# Supplementary material for: HOXA9 Cooperates with Activated JAK/STAT Signaling to Drive Leukemia Development
Source: Oxford University Press journal article supplement (doi:10.1158/2159-8290.cd-17-0583), 2018-03-01
Supplement: 21598290cd170583-sup-183828_2_supp_4577671_p4jhkc.xlsx [file 21598290cd170583-sup-183828_2_supp_4577671_p4jhkc.xlsx]

## Sheet: TALL-JAK3_vs_WT.DESeq2.csv
	baseMean	log2FoldChange	lfcSE	stat	pvalue	padj
Il18r1	8816.43	6.72372	0.156677	42.9146	0	0
S100a8	2805.55	7.77116	0.219878	35.3431	1.27805e-273	9.52021e-270
Lrrk1	2158.54	7.94717	0.239878	33.1301	1.09621e-240	5.44379e-237
Cxcr3	2573.19	6.96943	0.214397	32.5072	8.44778e-232	3.14638e-228
Tbx3	1549.43	6.37654	0.229621	27.7698	1.00463e-169	2.99339e-166
Fcgrt	3596.92	5.96628	0.215723	27.6571	2.2924e-168	5.69203e-165
Klrc1	4397.26	9.71783	0.372118	26.1149	2.46855e-150	5.25379e-147
Prkca	969.356	2.69981	0.103424	26.1044	3.24596e-150	6.04479e-147
Chst11	1158.93	4.09988	0.15934	25.7303	5.3495e-146	8.8552e-143
Plekha1	3921.16	7.89791	0.3099	25.4854	2.86169e-143	4.26335e-140
Klrk1	6284.49	8.20459	0.325164	25.2321	1.7789e-140	2.40928e-137
Ctla2a	1784.23	5.65397	0.225403	25.0839	7.45888e-139	9.26021e-136
Aqp9	1299.12	6.65358	0.266463	24.97	1.29491e-137	1.48397e-134
Ccr5	1591.08	7.77709	0.31271	24.8699	1.57358e-136	1.67452e-133
Il18rap	3924.99	8.00658	0.323541	24.7467	3.36073e-135	3.33788e-132
Naip6	604.389	6.78371	0.274543	24.7092	8.52733e-135	7.94001e-132
2700081O15Rik	554.145	-5.71328	0.234588	-24.3546	5.18446e-131	4.54341e-128
Klrb1c	3151.34	9.39187	0.38713	24.2603	5.15325e-130	4.26518e-127
Atp2b1	4630.13	2.90702	0.119973	24.2307	1.05774e-129	8.29378e-127
Ly6c2	3770.81	4.89066	0.204974	23.8599	7.99841e-126	5.95801e-123
Pde3b	9614.3	6.18558	0.260413	23.7529	1.02449e-124	7.26803e-122
Samd4b	2426.89	7.6197	0.32284	23.6021	3.66939e-123	2.48484e-120
Ccr9	4109.67	-8.13419	0.346699	-23.4618	1.00112e-121	6.48465e-119
Serpina3i	751.368	6.8552	0.292952	23.4004	4.2292e-121	2.62528e-118
Prr14l	1775.92	2.42293	0.105037	23.0674	9.84343e-118	5.8659e-115
Aim1	3903.21	2.45408	0.107583	22.8112	3.55067e-115	2.03453e-112
S100a6	667.872	6.75319	0.296477	22.7781	7.55865e-115	4.1707e-112
Eomes	2968.09	4.49036	0.197874	22.693	5.24796e-114	2.79229e-111
Slc9a9	421.943	3.91531	0.173405	22.579	6.9631e-113	3.57711e-110
Scd4	4367.1	-2.66663	0.118579	-22.4883	5.40348e-112	2.68337e-109
Hip1	426.469	4.20505	0.189254	22.2191	2.2458e-109	1.07929e-106
Atf6	909.287	2.51473	0.11355	22.1464	1.12974e-108	5.25965e-106
Lyn	464.475	5.99636	0.27108	22.1203	2.01665e-108	9.10428e-106
Fam46a	2240.31	4.57184	0.207186	22.0663	6.66197e-108	2.91912e-105
Slc26a1	704.906	4.04794	0.183646	22.042	1.13881e-107	4.84742e-105
Cd97	15372.5	3.6139	0.165168	21.8801	4.01838e-106	1.66294e-103
Tysnd1	453.121	6.48161	0.299072	21.6724	3.73937e-104	1.50565e-101
Timp4	903.246	-3.46857	0.160416	-21.6223	1.10716e-103	4.34064e-101
Cd55	1162.62	4.308	0.199885	21.5524	5.02794e-103	1.92067e-100
Sigirr	5893.24	3.07608	0.143019	21.5082	1.3034e-102	4.85453e-100
Ctla2b	524.349	5.78651	0.269927	21.4373	5.99539e-102	2.17852e-99
Gas7	1093.74	8.93102	0.425766	20.9764	1.07787e-97	3.82337e-95
Emilin1	366.285	-3.94072	0.188844	-20.8676	1.05425e-96	3.65261e-94
Gzmm	3858.27	7.78593	0.374232	20.8051	3.8932e-96	1.3182e-93
Cdh24	654.006	-3.06152	0.147344	-20.7781	6.83007e-96	2.26121e-93
Ccr2	1815.99	7.49517	0.361941	20.7083	2.91815e-95	9.451e-93
Naip7	555.547	7.98885	0.38975	20.4974	2.27136e-93	7.19973e-91
Heatr9	838.343	8.70353	0.426926	20.3865	2.20289e-92	6.83723e-90
Dnmt3a	2726.39	-1.92322	0.0947773	-20.292	1.51317e-91	4.60066e-89
Slco4c1	2051.82	2.10252	0.103688	20.2774	2.0378e-91	6.07182e-89
Fam49a	1769.92	3.30848	0.163368	20.2516	3.43606e-91	1.00373e-88
Proser1	550.637	7.08415	0.354199	20.0005	5.45703e-89	1.56344e-86
Ptprh	958.987	-8.46264	0.423232	-19.9953	6.05643e-89	1.70243e-86
Atp2b4	1658.61	5.19855	0.260786	19.9342	2.05695e-88	5.67489e-86
Hopx	2080.11	5.53988	0.284216	19.4918	1.28803e-84	3.48891e-82
Klre1	1095.28	8.65918	0.444667	19.4734	1.84622e-84	4.91159e-82
Mfsd7a	1259.26	2.66319	0.136902	19.4533	2.73523e-84	7.14903e-82
Prss2	648.453	8.34714	0.42987	19.4178	5.45512e-84	1.40121e-81
Lpar5	345.269	3.27331	0.168859	19.3849	1.03435e-83	2.61183e-81
Gzmb	2798.93	7.5426	0.393887	19.1492	9.835e-82	2.44203e-79
Smoc2	743.717	-7.11564	0.374799	-18.9852	2.26093e-80	5.52187e-78
Ahnak	24818	4.31191	0.227646	18.9413	5.20835e-80	1.25152e-77
Myo1h	4491.5	4.36042	0.230859	18.8878	1.43688e-79	3.39788e-77
Ccl5	13945.4	7.8133	0.420266	18.5913	3.77852e-77	8.79568e-75
F2rl2	298.675	6.48924	0.349741	18.5544	7.50892e-77	1.72104e-74
Slamf9	1129.51	5.53442	0.298831	18.5202	1.41825e-76	3.20137e-74
Tppp3	850.583	7.15131	0.387329	18.4631	4.0889e-76	9.09201e-74
Dmrta1	717.999	8.95676	0.486218	18.4213	8.8651e-76	1.94224e-73
Setd1b	485.636	4.70391	0.255454	18.4139	1.01584e-75	2.19334e-73
Cd22	829.493	8.56142	0.466842	18.339	4.03985e-75	8.59795e-73
Gbp3	784.75	2.39643	0.130834	18.3166	6.10629e-75	1.28129e-72
Bmpr1a	462.381	6.7547	0.369103	18.3003	8.22674e-75	1.70225e-72
Gab3	572.215	3.27414	0.179069	18.2843	1.1038e-74	2.25266e-72
Rai1	2474.91	-11.4701	0.629153	-18.2311	2.92478e-74	5.8883e-72
Abcb1a	2202.94	5.08605	0.279067	18.2252	3.25648e-74	6.46866e-72
5430427O19Rik	207.782	4.96098	0.274014	18.1049	2.91626e-73	5.71663e-71
Arpp21	1473.35	-10.2449	0.568821	-18.0107	1.60451e-72	3.10442e-70
Wdsub1	274.63	5.92026	0.328954	17.9973	2.04688e-72	3.90954e-70
Yif1b	380.571	7.87658	0.444706	17.7119	3.39606e-70	6.40436e-68
Ank	730.646	3.46308	0.197332	17.5495	6.00051e-69	1.11745e-66
Itpripl2	615.927	4.80639	0.274275	17.5239	9.40884e-69	1.73053e-66
Zdhhc21	289.399	3.98714	0.227828	17.5006	1.41687e-68	2.5742e-66
Myo5b	237.985	4.26053	0.244703	17.411	6.80796e-68	1.22199e-65
Lyz2	937.26	6.60296	0.381169	17.323	3.15735e-67	5.59978e-65
Crebrf	2422.6	2.27646	0.131706	17.2845	6.15557e-67	1.07889e-64
Lats2	1063.53	2.23367	0.129348	17.2686	8.10691e-67	1.40438e-64
Rp1	620.419	-8.54707	0.496097	-17.2286	1.61929e-66	2.7729e-64
Rhot2	384.067	3.50207	0.203475	17.2113	2.1849e-66	3.69894e-64
Ppm1l	1004.88	6.54102	0.380749	17.1794	3.79058e-66	6.34517e-64
Il10rb	2287.15	3.02976	0.176493	17.1664	4.73512e-66	7.8382e-64
Pglyrp3	449.698	3.59237	0.210375	17.076	2.24009e-65	3.66735e-63
Ttc39d	2529.56	3.6462	0.214116	17.0291	4.99851e-65	8.09432e-63
C1qtnf6	426.179	5.31407	0.313306	16.9613	1.58789e-64	2.54369e-62
Anxa1	802.778	8.2414	0.486149	16.9524	1.84699e-64	2.92728e-62
Fcer1g	447.623	7.02533	0.415018	16.9278	2.80749e-64	4.40274e-62
Tpra1	422.351	6.88086	0.406943	16.9087	3.88301e-64	6.02595e-62
Ptprm	423.993	2.29499	0.135844	16.8944	4.95017e-64	7.60285e-62
Ephb6	650.26	-2.56458	0.152209	-16.8491	1.06518e-63	1.61929e-61
Il2rb	25119.9	3.66709	0.217666	16.8473	1.098e-63	1.65233e-61
Fcgr2b	2039.19	9.34444	0.55567	16.8165	1.8463e-63	2.75061e-61
Rpusd1	1856.39	1.38844	0.0825787	16.8135	1.94341e-63	2.86663e-61
Tmie	321.778	7.06584	0.420466	16.8048	2.25188e-63	3.28907e-61
Arhgef3	4689.73	1.53683	0.0914972	16.7965	2.58873e-63	3.71462e-61
Csf1r	494.587	8.43921	0.502441	16.7964	2.5931e-63	3.71462e-61
Nek9	2979.99	1.98198	0.118151	16.7751	3.71529e-63	5.27147e-61
Osbpl7	1160.52	2.40199	0.143301	16.7619	4.63391e-63	6.51283e-61
Saa2	1330.82	9.22083	0.550817	16.7403	6.66782e-63	9.28385e-61
Itga2	674.021	6.92417	0.414112	16.7205	9.28897e-63	1.28136e-60
Tcp10a	4674.51	-1.25943	0.0754041	-16.7024	1.25975e-62	1.72182e-60
Prdm11	573.807	6.51498	0.390486	16.6843	1.70526e-62	2.30954e-60
Itgae	4857.24	-5.50216	0.330236	-16.6613	2.50447e-62	3.3614e-60
Plekho1	515.078	2.57846	0.154782	16.6586	2.62067e-62	3.48596e-60
Fasl	1271.4	7.50137	0.451695	16.6072	6.18614e-62	8.15585e-60
Bcl2	12820.3	2.81603	0.170055	16.5595	1.36676e-61	1.78614e-59
Ryr2	224.945	5.34001	0.323101	16.5273	2.33173e-61	3.02071e-59
Socs1	179.963	5.14612	0.311675	16.5112	3.05001e-61	3.91716e-59
Olfm3	894.266	9.59951	0.581842	16.4985	3.76209e-61	4.7904e-59
Utp11l	517.872	5.00592	0.304893	16.4186	1.40807e-60	1.77774e-58
Serpinb9c	1059.83	3.25333	0.199754	16.2867	1.22762e-59	1.5369e-57
Colq	753.616	-3.6294	0.223361	-16.249	2.26959e-59	2.81769e-57
Epsti1	6093.12	1.67541	0.103194	16.2355	2.82926e-59	3.4835e-57
Cobll1	880.755	5.10336	0.314676	16.2178	3.77214e-59	4.60634e-57
Hmgn2	2631.47	-3.11981	0.192556	-16.2021	4.87005e-59	5.8987e-57
Cd44	4306.82	4.59144	0.283615	16.189	6.03391e-59	7.19146e-57
Idh2	1068.33	-2.47146	0.152663	-16.189	6.02806e-59	7.19146e-57
Ung	654.994	3.71683	0.229857	16.1702	8.1848e-59	9.67755e-57
Tjp1	186.778	4.09403	0.254026	16.1166	1.95176e-58	2.28955e-56
5830416P10Rik	525.911	3.61328	0.224324	16.1074	2.2641e-58	2.6352e-56
Chdh	321.23	-6.73349	0.418147	-16.1032	2.42395e-58	2.79938e-56
Rhobtb2	638.303	4.6702	0.291253	16.0349	7.29422e-58	8.35918e-56
Efhd2	2880.34	1.6465	0.102691	16.0336	7.44351e-58	8.46514e-56
Plekhb2	176.198	5.33573	0.333221	16.0126	1.04346e-57	1.17768e-55
Tbl1xr1	315.152	5.5133	0.344545	16.0017	1.24356e-57	1.39298e-55
F2r	4610.42	4.25197	0.266528	15.9532	2.70786e-57	3.01058e-55
Nt5e	565.202	-4.43157	0.278864	-15.8915	7.25296e-57	8.00404e-55
Cblb	2868.9	1.41183	0.0889506	15.8721	9.88664e-57	1.08302e-54
6530402F18Rik	607.726	4.11897	0.261397	15.7575	6.0988e-56	6.63211e-54
Tnfsf9	199.578	6.17654	0.39229	15.7449	7.44998e-56	8.04274e-54
Mtfp1	2079.91	-1.42158	0.0903668	-15.7312	9.24287e-56	9.90649e-54
Ranbp2	3001.34	1.49108	0.0949428	15.705	1.39809e-55	1.48776e-53
Noto	367.141	-7.8473	0.499938	-15.6965	1.5973e-55	1.6877e-53
Ptprtos	1421.77	-3.64923	0.234179	-15.5831	9.4884e-55	9.9548e-53
Nid1	849.439	7.89963	0.50719	15.5753	1.07188e-54	1.11671e-52
Myo7b	2846.78	7.00761	0.45249	15.4868	4.26213e-54	4.40953e-52
Syt15	702.758	-9.55765	0.617575	-15.4761	5.03098e-54	5.16907e-52
Eea1	784.997	3.17962	0.205688	15.4585	6.61592e-54	6.70504e-52
Gda	264.506	7.81589	0.505601	15.4586	6.60008e-54	6.70504e-52
Ctsd	9284.97	1.37536	0.0889859	15.456	6.87829e-54	6.92384e-52
Pitpnm2	3273.3	1.58644	0.102671	15.4518	7.33873e-54	7.33774e-52
Slc25a26	992.041	4.47461	0.290641	15.3957	1.75051e-53	1.73861e-51
Gpr183	1787.17	3.18675	0.207667	15.3455	3.79686e-53	3.74607e-51
Fam19a3	437.587	7.76316	0.510225	15.2152	2.8044e-52	2.74868e-50
Cdc42ep3	839.821	2.57043	0.168992	15.2104	3.01746e-52	2.93818e-50
Rusc1	559.605	3.51585	0.231437	15.1914	4.03253e-52	3.90108e-50
Dennd4a	4799.08	3.44686	0.227065	15.18	4.79429e-52	4.60808e-50
Fndc3b	166.601	4.01828	0.264716	15.1796	4.82907e-52	4.61176e-50
Cd101	411.157	2.43031	0.16032	15.1592	6.5904e-52	6.25374e-50
Dgke	1493.05	-1.96152	0.129523	-15.1441	8.28268e-52	7.80983e-50
Angptl2	247.846	-6.27745	0.414913	-15.1296	1.03343e-51	9.68304e-50
Lair1	470.651	2.94857	0.19515	15.1092	1.40757e-51	1.31062e-49
Nodal	3642.9	2.81129	0.18607	15.1088	1.41663e-51	1.31087e-49
Samsn1	13041.6	2.6501	0.175461	15.1036	1.53324e-51	1.41001e-49
Stat5b	3805.84	2.46612	0.163622	15.0721	2.47082e-51	2.2583e-49
Arl4d	995.602	5.78277	0.384028	15.0582	3.04928e-51	2.77001e-49
Camk2n1	325.646	4.98393	0.33153	15.0331	4.45425e-51	4.02178e-49
B430306N03Rik	322.764	3.01629	0.200881	15.0153	5.83143e-51	5.23353e-49
Ldhb	440.571	-4.50314	0.300297	-14.9956	7.84212e-51	6.99592e-49
Golm1	2203.65	2.41999	0.162156	14.9238	2.30595e-50	2.04488e-48
Znrf3	4170.36	-1.87988	0.126071	-14.9112	2.7856e-50	2.45561e-48
Aqp11	261.718	-6.52855	0.439056	-14.8695	5.19933e-50	4.55645e-48
Pcgf5	217.536	4.059	0.273289	14.8524	6.71045e-50	5.84633e-48
Wt1os	248.622	4.12701	0.277983	14.8462	7.35799e-50	6.37322e-48
Gimap3	15328.2	1.92927	0.130178	14.8202	1.0846e-49	9.34006e-48
Zbtb8a	517.579	8.13554	0.550676	14.7738	2.16322e-49	1.85217e-47
Tmem158	225.618	-6.73073	0.456973	-14.7289	4.20204e-49	3.57726e-47
Serpinb1c	336.804	7.19533	0.489819	14.6898	7.49446e-49	6.34389e-47
Tnik	3130.58	4.11317	0.280063	14.6866	7.85785e-49	6.61391e-47
Xrn1	2398.9	-2.45286	0.167548	-14.6398	1.56569e-48	1.31043e-46
Ssc5d	1944.62	-2.02407	0.138985	-14.5632	4.81726e-48	4.00936e-46
Mx2	743.59	2.17833	0.149709	14.5504	5.80247e-48	4.80251e-46
Arvcf	194.502	-4.1996	0.288874	-14.5378	6.97883e-48	5.74423e-46
Klrd1	2144.97	2.6174	0.180198	14.5251	8.40418e-48	6.87942e-46
Gramd4	6428.76	1.36422	0.0949363	14.3699	7.99761e-47	6.51084e-45
Ncam2	301.332	4.28738	0.298821	14.3476	1.10236e-46	8.9255e-45
Cd200r4	235.918	5.32886	0.37173	14.3353	1.31685e-46	1.06045e-44
Kctd12	1324.91	2.5245	0.17767	14.2089	8.06591e-46	6.46053e-44
Nicn1	223.06	-6.53362	0.461023	-14.172	1.3651e-45	1.08756e-43
Pebp4	767.685	4.29841	0.303384	14.1682	1.44141e-45	1.14224e-43
Lrp1	219.893	4.26003	0.30095	14.1553	1.73249e-45	1.36564e-43
Setbp1	169.23	-4.51372	0.319521	-14.1265	2.60738e-45	2.04446e-43
Tmem38b	363.431	8.41002	0.596113	14.1081	3.38645e-45	2.64143e-43
D630039A03Rik	145.197	4.95487	0.352511	14.0559	7.0861e-45	5.47905e-43
Unc5c	369.821	4.98554	0.354696	14.0558	7.09798e-45	5.47905e-43
Pik3c2b	768.757	5.77173	0.411679	14.02	1.17685e-44	9.03747e-43
Palm3	442.664	-4.15335	0.29829	-13.9239	4.53603e-44	3.46553e-42
Gimap7	1973.27	2.94664	0.21205	13.8959	6.70392e-44	5.09566e-42
Atxn1	523.653	2.6477	0.190882	13.8709	9.51278e-44	7.19398e-42
Vit	1604.3	2.26508	0.163681	13.8384	1.49595e-43	1.12559e-41
Cbx1	1161.18	-1.43813	0.103992	-13.8292	1.69963e-43	1.27242e-41
Vwa5b2	920.664	1.93093	0.139827	13.8093	2.23852e-43	1.66747e-41
Cybb	514.33	6.53816	0.475282	13.7564	4.66288e-43	3.4561e-41
Kcnj8	716.806	7.80637	0.570197	13.6907	1.15453e-42	8.51497e-41
Epb4.1l2	1562.23	-1.3925	0.101988	-13.6535	1.92293e-42	1.41123e-40
Man2a1	2763.06	1.43025	0.104898	13.6347	2.49015e-42	1.81854e-40
Itga1	928.881	8.07473	0.59314	13.6135	3.32775e-42	2.41838e-40
Tmem67	619.618	2.3536	0.173004	13.6043	3.77373e-42	2.72918e-40
Egr1	626.569	-2.51942	0.185362	-13.5919	4.47204e-42	3.21857e-40
Apobec3	3689.08	1.00496	0.0739445	13.5908	4.54224e-42	3.25338e-40
Ampd1	188.195	-6.5765	0.486461	-13.5191	1.20687e-41	8.60284e-40
Ntan1	2620.15	3.05186	0.225802	13.5156	1.26455e-41	8.97104e-40
Spry3	173.899	-3.63434	0.269657	-13.4777	2.11704e-41	1.49477e-39
Capn2	2854.15	2.3055	0.17117	13.4691	2.37883e-41	1.67169e-39
Adamtsl2	258.356	-7.71124	0.572582	-13.4675	2.43021e-41	1.69978e-39
Zmat5	978.993	2.32624	0.172876	13.4561	2.83364e-41	1.97269e-39
Tmem74	2377.49	1.98558	0.147572	13.455	2.87765e-41	1.99401e-39
Arhgap26	1321.49	2.80956	0.208817	13.4546	2.89168e-41	1.99446e-39
Gm4980	182.631	5.06508	0.376642	13.448	3.16323e-41	2.1717e-39
Bcl7a	788.859	-1.65056	0.122811	-13.4398	3.5331e-41	2.4145e-39
Serinc5	14577.7	1.61053	0.12039	13.3776	8.1756e-41	5.56165e-39
S100g	611.55	7.1651	0.535807	13.3725	8.74935e-41	5.9249e-39
Atp8b4	3904.9	1.82053	0.136251	13.3616	1.01412e-40	6.83635e-39
Pikfyve	8378.01	2.07727	0.156	13.3159	1.87137e-40	1.25584e-38
Syk	153.141	-5.69982	0.428208	-13.3109	2.00146e-40	1.33712e-38
Casp1	340.916	6.03333	0.453288	13.3102	2.02039e-40	1.34374e-38
Pde9a	213.321	2.50236	0.18805	13.3069	2.11101e-40	1.39777e-38
Anp32e	7256.34	-2.26257	0.17009	-13.3022	2.24645e-40	1.47434e-38
Klrc2	234.134	7.90362	0.594151	13.3024	2.24189e-40	1.47434e-38
Arsi	176.218	-6.65307	0.5003	-13.2982	2.37209e-40	1.54997e-38
Emr4	145.729	6.98528	0.525581	13.2906	2.62555e-40	1.7081e-38
Rabep2	1729.88	1.34853	0.101713	13.2582	4.04515e-40	2.6202e-38
Pogz	2756.98	3.82001	0.288518	13.2401	5.14895e-40	3.32074e-38
Dut	2581.36	-2.47357	0.187155	-13.2167	7.02909e-40	4.51376e-38
Itgb3	2000.5	2.19709	0.166374	13.2057	8.13459e-40	5.20125e-38
Plxna2	150.113	-5.88231	0.445581	-13.2014	8.60881e-40	5.48094e-38
N4bp2l1	3590.1	2.46608	0.186825	13.2	8.77881e-40	5.56539e-38
Dusp3	223.98	8.4806	0.642516	13.1991	8.88431e-40	5.60841e-38
Gm1966	4040.83	2.38897	0.181182	13.1855	1.0637e-39	6.68653e-38
Anp32a	5453.79	-1.21096	0.091851	-13.184	1.08464e-39	6.78946e-38
Desi1	2012.83	-1.71346	0.130049	-13.1754	1.2156e-39	7.57739e-38
Rmrp	5546.58	-1.18009	0.0895903	-13.1721	1.26975e-39	7.88195e-38
Rnf125	249.933	2.38454	0.181097	13.1673	1.35437e-39	8.37234e-38
Dgkeos	276.535	-8.01683	0.60961	-13.1508	1.68479e-39	1.03719e-37
Stmn2	1714.58	-2.78691	0.211947	-13.1491	1.72187e-39	1.05566e-37
Disc1	144.35	4.0361	0.307677	13.118	2.59734e-39	1.58587e-37
Atp10d	1504.65	1.55013	0.118423	13.0898	3.76793e-39	2.29121e-37
Slc9a2	339.449	2.38981	0.182815	13.0723	4.74292e-39	2.87236e-37
Lancl3	135.28	6.88231	0.526772	13.0651	5.21455e-39	3.1452e-37
Aldh7a1	325.187	-2.8975	0.221923	-13.0563	5.84688e-39	3.51237e-37
Kbtbd11	15779.7	3.42581	0.26354	12.9992	1.23674e-38	7.39956e-37
Mxd3	157.298	-3.76671	0.290019	-12.9878	1.43468e-38	8.54955e-37
Rab2a	495.722	8.9842	0.692123	12.9806	1.57546e-38	9.35107e-37
Spsb3	348.843	-3.72927	0.287347	-12.9783	1.62465e-38	9.60478e-37
Fgfr1op	738.631	-1.47946	0.114031	-12.9742	1.71414e-38	1.00906e-36
Vapb	176.224	-6.81899	0.525593	-12.9739	1.72037e-38	1.00906e-36
Zcchc24	883.033	4.95214	0.382178	12.9577	2.12605e-38	1.24211e-36
Mettl21c	468.317	3.05591	0.236105	12.943	2.57291e-38	1.49731e-36
Park2	228.107	-4.86715	0.376559	-12.9253	3.23851e-38	1.87733e-36
Akt3	1074.79	1.76302	0.136427	12.9228	3.34629e-38	1.93229e-36
Osbpl6	1995.23	5.22832	0.404624	12.9214	3.40753e-38	1.96005e-36
Nptx2	3617.77	1.9944	0.154375	12.9192	3.50943e-38	2.0109e-36
Tbc1d19	388.302	2.17328	0.168441	12.9023	4.368e-38	2.49328e-36
Adora2a	1100.6	3.28363	0.254825	12.8858	5.41006e-38	3.0763e-36
Prickle3	232.249	-5.94425	0.4625	-12.8524	8.333e-38	4.72034e-36
H2-Q10	200.325	4.6791	0.366076	12.7818	2.07277e-37	1.1697e-35
Tmem81	707.023	1.76849	0.138738	12.747	3.24122e-37	1.82218e-35
Lpin1	8494.53	4.24285	0.333189	12.7341	3.8243e-37	2.14189e-35
Fam46c	997.822	1.98652	0.156403	12.7013	5.81354e-37	3.24383e-35
Crtam	1021.28	2.0905	0.165039	12.6667	9.04334e-37	5.02715e-35
Cbx2	535.039	-2.1346	0.1687	-12.6532	1.07381e-36	5.94708e-35
Il17rb	152.264	-6.01	0.475261	-12.6457	1.18191e-36	6.52153e-35
Golim4	844.876	1.51743	0.120062	12.6387	1.29102e-36	7.09729e-35
Ntrk1	180.276	3.78233	0.299291	12.6376	1.30948e-36	7.17227e-35
Palb2	277.873	3.61215	0.286236	12.6195	1.64901e-36	8.99891e-35
Ms4a6d	9008.57	1.48067	0.117342	12.6185	1.67067e-36	9.08381e-35
Asap2	454.7	2.78199	0.220971	12.5898	2.40221e-36	1.30139e-34
Fcgr3	122.321	6.72549	0.53467	12.5788	2.76304e-36	1.49144e-34
Cbx7	2698.83	1.76976	0.140964	12.5547	3.74396e-36	2.01363e-34
Emilin2	527.049	7.57091	0.603051	12.5544	3.76246e-36	2.0163e-34
Zfp764	271.518	2.49877	0.199132	12.5483	4.06115e-36	2.16857e-34
Pygo1	604.683	6.18751	0.494071	12.5235	5.5514e-36	2.95374e-34
Fgl2	5017.88	8.70465	0.695187	12.5213	5.70846e-36	3.0265e-34
Apobr	1165.39	3.59024	0.287131	12.5039	7.11129e-36	3.75688e-34
Rcn3	2216.66	2.25002	0.18001	12.4994	7.5195e-36	3.9585e-34
Il7r	13010.9	2.96414	0.237162	12.4984	7.61872e-36	3.99661e-34
Nxf1	189.808	-7.58799	0.607323	-12.4942	8.0345e-36	4.19993e-34
Trim50	302.862	3.14828	0.252041	12.4912	8.34387e-36	4.3464e-34
Smpx	1146.17	1.78463	0.14293	12.4861	8.89531e-36	4.6175e-34
Hnrnpa2b1	21387.6	-1.03272	0.0827487	-12.4802	9.56936e-36	4.95015e-34
Trpm3	190.789	-7.58709	0.608661	-12.4652	1.15559e-35	5.95707e-34
Phldb2	186.878	2.99851	0.240719	12.4565	1.28938e-35	6.62388e-34
Cux1	3277.69	-1.91771	0.154008	-12.452	1.3637e-35	6.9816e-34
Tgfbr2	152.142	6.10939	0.490944	12.4442	1.50432e-35	7.67512e-34
Ramp3	1007.34	-5.29706	0.425782	-12.4408	1.56987e-35	7.9822e-34
Itgam	293.564	4.40005	0.35401	12.4292	1.81519e-35	9.1982e-34
H2-Q5	516.917	2.6398	0.212561	12.419	2.06025e-35	1.04046e-33
Runx1	391.429	2.36002	0.190209	12.4075	2.37965e-35	1.1977e-33
Tmem161a	105.293	5.49393	0.443909	12.3763	3.51367e-35	1.76252e-33
Sema4g	7626.78	1.07926	0.0872467	12.3702	3.78942e-35	1.89446e-33
Npas4	132.809	7.23729	0.585291	12.3653	4.02708e-35	2.00654e-33
Cpeb2	365.174	1.94417	0.157621	12.3344	5.91121e-35	2.93551e-33
Plscr5	345.85	-2.19359	0.178072	-12.3186	7.19758e-35	3.56244e-33
Arhgap20	149.267	-6.58133	0.535557	-12.2888	1.0409e-34	5.13488e-33
Tcp1	381.156	2.26497	0.184487	12.2772	1.20157e-34	5.90791e-33
Sik3	3042.96	-4.54075	0.370008	-12.272	1.28002e-34	6.27292e-33
Gsap	872.324	4.00125	0.326148	12.2682	1.34188e-34	6.55454e-33
Slc15a3	171.831	-6.70086	0.546495	-12.2615	1.45743e-34	7.09569e-33
Camkv	166.28	-6.51809	0.531682	-12.2594	1.4962e-34	7.26072e-33
Dtx4	324.567	3.92979	0.320598	12.2577	1.52807e-34	7.39129e-33
9030617O03Rik	503.762	2.04961	0.167483	12.2377	1.95479e-34	9.42476e-33
Camk4	2287.92	-2.00364	0.163976	-12.2191	2.45898e-34	1.18174e-32
2610318N02Rik	219.94	-3.72894	0.305281	-12.2148	2.59128e-34	1.24132e-32
Sgsm2	750.21	2.06547	0.1694	12.1928	3.39355e-34	1.62042e-32
Crip2	168.282	2.83726	0.232847	12.1851	3.73312e-34	1.77687e-32
Prg3	3056.43	3.90266	0.320384	12.1812	3.91441e-34	1.85722e-32
Kcnk5	668.355	2.4989	0.205499	12.1602	5.06469e-34	2.39536e-32
Nynrin	224.537	-3.84781	0.316884	-12.1427	6.27474e-34	2.95826e-32
Elovl7	400.542	2.26295	0.186707	12.1204	8.23934e-34	3.87223e-32
Mphosph10	973.868	5.32817	0.439661	12.1188	8.39416e-34	3.93259e-32
Trim3	7758.12	-1.13351	0.0935568	-12.1157	8.7191e-34	4.07201e-32
Spic	125.957	6.70932	0.553799	12.1151	8.78609e-34	4.09048e-32
Dennd5a	1892.52	2.4528	0.202516	12.1116	9.16603e-34	4.25407e-32
Kcnh3	128.714	-6.23079	0.515968	-12.0759	1.4157e-33	6.55002e-32
Sirpb1b	282.377	6.37793	0.528654	12.0645	1.62707e-33	7.50466e-32
Dyrk4	110.04	4.70911	0.391298	12.0346	2.33844e-33	1.07525e-31
Sidt1	475.87	-1.84943	0.153741	-12.0295	2.48668e-33	1.13989e-31
Aars2	601.324	-1.63515	0.136259	-12.0003	3.54047e-33	1.61797e-31
Dapk2	284.239	5.36816	0.447557	11.9944	3.80354e-33	1.73288e-31
Abhd5	257.952	2.22409	0.185478	11.9911	3.95639e-33	1.79702e-31
Ell2	165.487	4.96987	0.414526	11.9893	4.04478e-33	1.83158e-31
Tek	1031.09	1.75151	0.146203	11.98	4.52456e-33	2.04263e-31
Entpd1	532.583	5.405	0.451469	11.972	4.979e-33	2.241e-31
Srsf9	8920.18	-1.05763	0.0883719	-11.9679	5.2326e-33	2.34805e-31
Sytl4	1331.66	4.00706	0.336005	11.9256	8.70815e-33	3.89591e-31
Ace	198.356	7.55733	0.634007	11.92	9.31532e-33	4.15508e-31
Id3	630.214	-5.28569	0.443778	-11.9107	1.04145e-32	4.6315e-31
Pawr	1328.58	-1.12576	0.0946722	-11.8911	1.31629e-32	5.83635e-31
9430015G10Rik	803.4	-1.31614	0.110759	-11.8829	1.45177e-32	6.41796e-31
Rnmt	941.179	1.4324	0.120702	11.8673	1.75081e-32	7.71701e-31
Nbn	10037.7	2.08879	0.176196	11.8549	2.02862e-32	8.91516e-31
St8sia6	1849.42	1.97182	0.166396	11.8501	2.14818e-32	9.41283e-31
Ptprg	869.239	1.96971	0.166416	11.8361	2.54062e-32	1.10998e-30
Pin1	1989.22	1.57636	0.133285	11.827	2.83203e-32	1.23367e-30
Edaradd	357.936	2.31114	0.195466	11.8237	2.94429e-32	1.27883e-30
Srsf6	454.876	-1.54924	0.131094	-11.8178	3.15905e-32	1.36813e-30
Stard3	525.118	3.26457	0.27637	11.8123	3.37211e-32	1.45616e-30
Hck	147.516	6.01869	0.50965	11.8095	3.48765e-32	1.50171e-30
Sh3d19	2304.75	1.88822	0.160088	11.7949	4.14541e-32	1.77978e-30
Sec31b	387.595	1.69326	0.143809	11.7744	5.29049e-32	2.26488e-30
Nrsn1	1029.67	5.6551	0.480541	11.7682	5.69202e-32	2.42979e-30
2017-08-31	2240.47	1.20919	0.102798	11.7628	6.06619e-32	2.58212e-30
Hdac7	8487.28	-0.820107	0.0697491	-11.758	6.42653e-32	2.72771e-30
Rassf6	175.955	4.40382	0.374802	11.7497	7.08513e-32	2.9987e-30
Amigo2	512.773	-3.0603	0.26086	-11.7316	8.78124e-32	3.70603e-30
Sos1	4813.75	1.95532	0.16683	11.7204	1.00169e-31	4.21559e-30
Ms4a7	911.859	2.76714	0.236355	11.7076	1.1658e-31	4.89241e-30
Thumpd2	633.204	2.48503	0.212555	11.6912	1.41312e-31	5.91368e-30
Nav3	292.899	6.31264	0.54088	11.671	1.79208e-31	7.47853e-30
Plch2	417.8	2.672	0.228989	11.6687	1.84212e-31	7.66592e-30
St6gal1	910.998	2.59358	0.222716	11.6452	2.42633e-31	1.00689e-29
Crebl2	547.215	2.4856	0.21347	11.6438	2.46694e-31	1.0209e-29
Mex3c	535.571	-2.35325	0.202256	-11.635	2.73637e-31	1.12926e-29
Tead1	198.936	-5.26875	0.453394	-11.6207	3.23553e-31	1.33157e-29
Snhg11	1540.07	-1.78505	0.153715	-11.6127	3.55072e-31	1.45726e-29
Serpinb6d	822.804	2.54322	0.219045	11.6105	3.64574e-31	1.49215e-29
Gria3	132.588	-6.03324	0.520083	-11.6005	4.09523e-31	1.67153e-29
Inppl1	387.682	4.72145	0.407895	11.5752	5.50668e-31	2.24149e-29
Dse	1335.96	2.06877	0.178781	11.5715	5.74593e-31	2.3325e-29
Map4k4	6036.23	-1.12787	0.0976833	-11.5462	7.71522e-31	3.1234e-29
Tlr3	112.199	6.96451	0.603931	11.532	9.10354e-31	3.67546e-29
Cyb5	1589.89	-1.12065	0.0972515	-11.5232	1.00819e-30	4.05945e-29
Asah1	454.261	1.99087	0.172972	11.5098	1.17806e-30	4.73067e-29
Itfg3	1092.47	2.66126	0.231329	11.5043	1.25569e-30	5.01537e-29
Klhl18	896.668	1.40867	0.122447	11.5043	1.25482e-30	5.01537e-29
S100b	328.06	7.24931	0.630693	11.4942	1.41086e-30	5.62007e-29
Ptdss2	183.708	-8.18962	0.713293	-11.4814	1.63556e-30	6.49776e-29
Cd53	10679.7	1.37686	0.120093	11.465	1.97796e-30	7.83713e-29
Wdr45b	831.796	1.37568	0.120087	11.4557	2.20056e-30	8.69602e-29
Zfp707	404.999	-5.09505	0.447945	-11.3743	5.61625e-30	2.21352e-28
Tdrd7	152.742	-7.57507	0.666454	-11.3662	6.15962e-30	2.42127e-28
H2-Ob	1094.25	2.62336	0.230813	11.3657	6.19304e-30	2.428e-28
Tmem144	114.848	5.08992	0.448451	11.35	7.41787e-30	2.90056e-28
Tmem66	1091.69	1.80026	0.158711	11.3431	8.0292e-30	3.13139e-28
Pard6a	224.592	7.78133	0.686326	11.3377	8.5395e-30	3.32171e-28
Bahcc1	242.82	-5.02712	0.443919	-11.3244	9.93471e-30	3.85436e-28
Tgs1	2903.01	1.33008	0.117929	11.2787	1.6717e-29	6.46882e-28
Mcph1	508.472	2.20463	0.19549	11.2774	1.69634e-29	6.54717e-28
Map6	2475	8.67482	0.769502	11.2733	1.77796e-29	6.84446e-28
Cul9	687.462	1.69809	0.15096	11.2486	2.3533e-29	9.03596e-28
Gprc5b	117.185	-6.40646	0.569698	-11.2453	2.4413e-29	9.34975e-28
Dennd4c	1861.36	1.89849	0.168837	11.2445	2.46504e-29	9.41645e-28
Txndc9	3075.24	2.14123	0.19049	11.2407	2.57458e-29	9.80975e-28
Lgals3	526.681	5.4018	0.480629	11.239	2.62266e-29	9.96744e-28
Zfp296	333.842	1.77401	0.15795	11.2315	2.85706e-29	1.08306e-27
Trib3	673.417	-3.45261	0.30746	-11.2295	2.92282e-29	1.10518e-27
Shoc2	598.469	-2.0662	0.184251	-11.214	3.47909e-29	1.31219e-27
Sall4	311.755	-2.95675	0.263702	-11.2125	3.54123e-29	1.33226e-27
Mex3d	784.959	-2.1572	0.192872	-11.1847	4.8473e-29	1.81902e-27
Csrnp1	1479.76	-2.32875	0.208519	-11.1681	5.84429e-29	2.18764e-27
Apol11b	243.024	7.5704	0.678074	11.1646	6.07866e-29	2.26967e-27
Smc6	10606.6	-1.33113	0.119245	-11.163	6.19019e-29	2.30554e-27
Irf5	172.453	4.17851	0.374637	11.1535	6.88548e-29	2.5581e-27
Atp6v0d2	94.4423	7.03353	0.63076	11.1509	7.08906e-29	2.62718e-27
Acvr2a	666.374	2.96904	0.266464	11.1423	7.80385e-29	2.88246e-27
Gimap4	16260	2.16555	0.194356	11.1422	7.81659e-29	2.88246e-27
Prl2a1	1620.34	1.98993	0.178687	11.1364	8.34525e-29	3.06982e-27
Sepw1	476.631	2.29257	0.206037	11.127	9.26726e-29	3.40058e-27
Il15ra	209.509	2.35417	0.211852	11.1123	1.09253e-28	3.99914e-27
S100a13	4064.43	1.72015	0.155107	11.0901	1.40177e-28	5.1185e-27
Nlrc4	386.396	1.98825	0.179385	11.0838	1.50432e-28	5.47954e-27
Tjp3	523.903	8.05333	0.727588	11.0685	1.78282e-28	6.47817e-27
Arc	155.787	-2.84843	0.257591	-11.0579	2.00692e-28	7.27472e-27
Gyg	783.751	1.50696	0.136412	11.0471	2.2651e-28	8.19064e-27
Casp4	147.952	5.31524	0.481622	11.0361	2.55863e-28	9.22965e-27
Eaf1	2333.22	-0.87716	0.0794912	-11.0347	2.59939e-28	9.35405e-27
Dock5	1503.9	3.06491	0.278227	11.0159	3.20439e-28	1.15034e-26
Kremen1	1628.32	-1.35975	0.123639	-10.9978	3.9156e-28	1.40227e-26
Chic1	116.206	3.52817	0.321047	10.9896	4.28859e-28	1.53217e-26
Nmral1	357.132	3.60171	0.327808	10.9872	4.4017e-28	1.56882e-26
Mbd3l2	2223.05	-0.838206	0.076304	-10.9851	4.50828e-28	1.60297e-26
Tspan8	108.118	-5.74143	0.523072	-10.9764	4.96534e-28	1.76128e-26
Aifm2	98.023	5.51303	0.502312	10.9753	5.02376e-28	1.77777e-26
Rai2	2444.14	-1.14084	0.103972	-10.9726	5.17673e-28	1.82756e-26
Tmem203	788.037	-1.2317	0.112505	-10.948	6.79602e-28	2.39355e-26
Ifitm3	92.6693	4.12538	0.376874	10.9463	6.9215e-28	2.43199e-26
Qrich1	355.399	5.27171	0.481981	10.9376	7.61869e-28	2.67067e-26
Tmem178	343.788	2.88058	0.26341	10.9357	7.77725e-28	2.71985e-26
Cnrip1	140.124	4.65714	0.426069	10.9305	8.24059e-28	2.87513e-26
Lonrf1	156.331	-2.58738	0.236772	-10.9277	8.49408e-28	2.95665e-26
Plxna4os1	160.474	-2.41297	0.22093	-10.9219	9.06098e-28	3.14663e-26
Herpud1	1785.46	1.17589	0.107723	10.9158	9.68354e-28	3.35501e-26
Sec24c	1502.38	1.77768	0.162899	10.9128	1.00148e-27	3.46173e-26
Narfl	189.713	6.4265	0.58912	10.9086	1.04803e-27	3.61425e-26
Phkb	113.456	7.14914	0.655668	10.9036	1.10783e-27	3.81164e-26
Kif7	183.425	-2.6758	0.245972	-10.8785	1.45987e-27	5.01132e-26
Ephb2	133.588	-7.00474	0.644494	-10.8686	1.62673e-27	5.57128e-26
Gpr25	114.48	-6.89071	0.634439	-10.8611	1.76576e-27	6.03356e-26
Csf2rb	117.483	5.81678	0.535638	10.8595	1.79649e-27	6.1245e-26
Nubp1	197.679	4.60907	0.424723	10.852	1.95198e-27	6.63939e-26
Actn2	97.6767	-5.81284	0.535957	-10.8457	2.08987e-27	7.09222e-26
Celsr2	365.744	-2.70703	0.250348	-10.8131	2.9856e-27	1.0109e-25
Cdca7	2568.74	-2.62612	0.243211	-10.7977	3.52926e-27	1.19226e-25
Tm7sf2	1276.01	2.03193	0.188591	10.7743	4.55451e-27	1.53514e-25
4930523C07Rik	1953.42	1.34505	0.124866	10.772	4.66899e-27	1.57017e-25
Enpp1	214.44	2.70374	0.251229	10.7621	5.19991e-27	1.74478e-25
Ms4a8a	186.006	3.36714	0.313104	10.7541	5.66977e-27	1.89816e-25
Gpr160	111.753	3.22327	0.299734	10.7538	5.68835e-27	1.90011e-25
Cd19	343.572	7.17094	0.666919	10.7523	5.77742e-27	1.92555e-25
Ydjc	165.315	-7.90858	0.735914	-10.7466	6.14849e-27	2.04465e-25
Cysltr2	228.636	3.38743	0.315345	10.742	6.46443e-27	2.14492e-25
Mettl10	254.655	6.89972	0.642683	10.7358	6.91109e-27	2.28803e-25
Rap2a	948.925	2.06471	0.192364	10.7333	7.09772e-27	2.34461e-25
Adrbk2	121.618	3.87693	0.361301	10.7305	7.32127e-27	2.4131e-25
Sntg2	1001.12	2.85409	0.266111	10.7252	7.75358e-27	2.54995e-25
Hipk1	11764.7	1.66299	0.155086	10.7231	7.9332e-27	2.60328e-25
Kcnmb4	93.4465	-4.84038	0.451488	-10.721	8.11643e-27	2.65657e-25
Xirp1	2924.47	3.74421	0.349248	10.7208	8.13128e-27	2.65657e-25
Phlda3	135.448	-3.27984	0.305983	-10.719	8.28722e-27	2.7016e-25
Zdhhc1	544.55	-1.27017	0.118571	-10.7124	8.90418e-27	2.89639e-25
Daam1	524.857	2.8055	0.261936	10.7106	9.07514e-27	2.94557e-25
Ifitm10	554.137	4.29093	0.400991	10.7008	1.00883e-26	3.2673e-25
Fam129a	359.492	2.93453	0.274402	10.6943	1.08246e-26	3.49815e-25
Sgpp2	1801.41	1.43295	0.13404	10.6905	1.12809e-26	3.63772e-25
Csf3r	245.542	7.02201	0.657109	10.6862	1.18078e-26	3.7994e-25
Tfe3	2155.48	-1.53886	0.144086	-10.6801	1.26079e-26	4.04812e-25
Piezo2	832.156	-1.67954	0.157372	-10.6724	1.36983e-26	4.38876e-25
Lyst	8180.87	2.30246	0.215894	10.6648	1.48728e-26	4.75484e-25
Recql4	1982.91	4.19165	0.393103	10.663	1.51627e-26	4.83714e-25
Pgap3	851.377	1.92098	0.180182	10.6613	1.54355e-26	4.91364e-25
Pisd	103.625	5.90354	0.554569	10.6453	1.83445e-26	5.82723e-25
Plekhg4	2736.83	-1.5037	0.14128	-10.6434	1.87209e-26	5.93414e-25
Ngrn	1527.8	1.06749	0.100461	10.6259	2.25719e-26	7.13964e-25
Slc27a3	306.969	-2.07643	0.195588	-10.6163	2.50183e-26	7.89668e-25
Aldh1a1	101.654	7.32397	0.691278	10.5948	3.14925e-26	9.91915e-25
Plekha8	332.406	2.81486	0.265868	10.5874	3.40933e-26	1.07157e-24
AW112010	3056.41	2.50157	0.236287	10.587	3.42496e-26	1.07421e-24
Cd300a	96.1754	6.95348	0.658276	10.5632	4.41495e-26	1.3818e-24
Farp1	145.681	3.16638	0.300297	10.5442	5.40559e-26	1.68831e-24
Slc34a2	462.516	1.43387	0.136067	10.538	5.77399e-26	1.7996e-24
Hnrnpr	2115.99	-1.19241	0.113163	-10.5371	5.82557e-26	1.81189e-24
Mob2	2575.03	1.28062	0.121565	10.5345	5.99134e-26	1.85956e-24
Klrc3	98.2308	7.7341	0.734652	10.5276	6.44793e-26	1.99712e-24
Rrnad1	543.744	1.97691	0.187832	10.5249	6.63654e-26	2.05127e-24
Sult1b1	389.763	7.58144	0.720594	10.5211	6.90645e-26	2.13028e-24
Tyr	1047.62	-2.52822	0.240374	-10.5179	7.14653e-26	2.19977e-24
Dock2	14776.9	1.30327	0.123993	10.5108	7.70628e-26	2.36718e-24
Ccdc136	163.905	6.93313	0.660043	10.5041	8.27413e-26	2.53638e-24
Ccnl1	3833	-0.913606	0.0870188	-10.4989	8.73465e-26	2.67205e-24
Dgcr6	239.62	-2.33318	0.222246	-10.4982	8.80282e-26	2.68739e-24
Tdpoz1	584.742	-1.67385	0.159508	-10.4938	9.22282e-26	2.80985e-24
Mlph	352.804	2.09376	0.19972	10.4835	1.02896e-25	3.12845e-24
Abhd17c	573.275	-1.43625	0.137189	-10.4691	1.1977e-25	3.63408e-24
Ap3m2	795.153	1.81803	0.173706	10.4662	1.23551e-25	3.74118e-24
Pdzd8	171.534	-2.60764	0.249448	-10.4536	1.41023e-25	4.2616e-24
Ttc4	104.141	5.85898	0.560963	10.4445	1.55279e-25	4.68288e-24
Ppara	472.581	1.38157	0.132456	10.4304	1.80123e-25	5.42115e-24
Rictor	2008.62	0.931968	0.0894653	10.4171	2.07219e-25	6.22409e-24
Zfp426	966.538	-1.53373	0.147279	-10.4138	2.14518e-25	6.43035e-24
Hnrnpa1	407.503	-1.53815	0.147845	-10.4038	2.38272e-25	7.12807e-24
Ano10	588.23	1.62417	0.156197	10.3982	2.52576e-25	7.54084e-24
Plxnc1	153.297	3.99302	0.384251	10.3917	2.70506e-25	8.05999e-24
Limd1	3876.84	1.19829	0.115346	10.3887	2.79079e-25	8.29883e-24
Ccdc85c	83.7315	-4.47845	0.431143	-10.3874	2.83031e-25	8.3996e-24
Ptms	98.1303	-5.91875	0.570215	-10.3799	3.06225e-25	9.06986e-24
Elmo1	3059.23	0.765992	0.0738184	10.3767	3.16521e-25	9.35621e-24
Epas1	504.919	5.82387	0.561386	10.3741	3.25283e-25	9.59617e-24
Tspan6	150.254	2.64182	0.25466	10.3739	3.2596e-25	9.59714e-24
Rps6ka6	994.305	1.24888	0.120456	10.3679	3.46994e-25	1.01963e-23
Lzic	556.77	-1.40109	0.135228	-10.3609	3.73337e-25	1.09488e-23
Ppp1r11	1622.08	-0.904324	0.0874915	-10.3361	4.83623e-25	1.41552e-23
Crim1	2073.86	3.11581	0.301455	10.3359	4.84853e-25	1.41634e-23
Ms4a4d	18377.5	1.98988	0.192608	10.3313	5.08908e-25	1.4837e-23
Rgs12	1425.64	-2.2602	0.218995	-10.3208	5.67652e-25	1.65173e-23
Steap2	93.4727	6.59092	0.638665	10.3199	5.73125e-25	1.66441e-23
Cdc7	1193.51	-1.35253	0.131253	-10.3047	6.70869e-25	1.94448e-23
Alox5ap	122.16	3.42001	0.332136	10.297	7.26721e-25	2.10227e-23
Plcd4	166.613	6.71549	0.652481	10.2922	7.63779e-25	2.20519e-23
Pcyox1	229.655	2.76585	0.268901	10.2858	8.16948e-25	2.35414e-23
Cyb5r4	1337.17	1.07724	0.104753	10.2836	8.35295e-25	2.40236e-23
Lrrc42	812.234	-2.81153	0.273723	-10.2714	9.47825e-25	2.72075e-23
Tnfaip6	176.84	7.9236	0.771506	10.2703	9.59105e-25	2.74784e-23
Tspo	1703.51	-4.36408	0.425022	-10.2679	9.83343e-25	2.81187e-23
Zc3h14	1044.86	1.89696	0.185094	10.2487	1.19987e-24	3.42446e-23
Zfp180	642.756	1.85993	0.181559	10.2442	1.25645e-24	3.57909e-23
Snx16	878.135	1.48564	0.145052	10.2422	1.28346e-24	3.64904e-23
1700025G04Rik	1931.65	1.99268	0.194649	10.2373	1.34979e-24	3.83032e-23
Dapk1	244.912	-3.82127	0.373417	-10.2332	1.40724e-24	3.98574e-23
Pmm2	2348.82	-0.897693	0.087828	-10.221	1.59628e-24	4.5126e-23
Ninj1	78.1668	-4.71455	0.461629	-10.2129	1.73674e-24	4.90038e-23
Foxp4	1380.49	-1.3085	0.128238	-10.2037	1.90846e-24	5.3747e-23
Nkiras2	7170.82	1.92926	0.189163	10.199	2.00396e-24	5.633e-23
1810026B05Rik	1223.83	-1.35821	0.133184	-10.198	2.02429e-24	5.67945e-23
Rpl36a	4428.54	-0.80138	0.0785839	-10.1978	2.02888e-24	5.68163e-23
Fbln2	98.4304	-6.61936	0.649194	-10.1963	2.0603e-24	5.75878e-23
Ero1lb	388.166	1.34207	0.131679	10.1919	2.15441e-24	6.01057e-23
B4galt5	1637.17	1.61445	0.158487	10.1866	2.27476e-24	6.33446e-23
Psma1	4144.41	-1.15989	0.113903	-10.1832	2.35674e-24	6.55051e-23
Slc12a1	82.2994	6.73484	0.663367	10.1525	3.22987e-24	8.96064e-23
Ccl6	127.71	6.17044	0.607978	10.1491	3.34382e-24	9.24646e-23
Dcun1d5	1282.52	-0.924567	0.0910987	-10.1491	3.34531e-24	9.24646e-23
Evpl	105.838	-4.54668	0.448596	-10.1353	3.85001e-24	1.06218e-22
Acsl3	332.76	-2.27529	0.224586	-10.131	4.02346e-24	1.10798e-22
Cldn12	90.1102	3.08156	0.304177	10.1308	4.03285e-24	1.10851e-22
Slc25a53	4603.43	-1.13185	0.111781	-10.1255	4.25624e-24	1.16776e-22
Polq	782.549	0.993219	0.0982394	10.1102	4.97867e-24	1.36346e-22
S100a14	730.398	1.48124	0.146651	10.1005	5.49729e-24	1.50273e-22
Rbm11	2599.46	1.11792	0.110699	10.0988	5.59482e-24	1.52659e-22
Axin2	959.869	1.61726	0.160166	10.0974	5.67242e-24	1.54493e-22
Rai14	139.418	-7.60483	0.753934	-10.0869	6.31546e-24	1.71693e-22
Sdhd	1714.09	-1.41002	0.140114	-10.0634	8.01794e-24	2.1758e-22
Dtymk	1185.55	-1.29411	0.12868	-10.0568	8.57173e-24	2.32185e-22
Zbtb44	159.683	2.63292	0.262023	10.0484	9.3347e-24	2.52393e-22
Dnajc15	1623.94	1.17955	0.117485	10.04	1.01643e-23	2.73829e-22
Rtn1	133.638	-3.74291	0.372795	-10.0401	1.01559e-23	2.73829e-22
Samd11	1205.69	-1.53323	0.152751	-10.0374	1.04358e-23	2.80636e-22
Ndrg3	517.201	-2.90305	0.289354	-10.0329	1.09296e-23	2.93385e-22
Ptpn3	7475.71	1.43896	0.143904	9.9994	1.53323e-23	4.10827e-22
Begain	99.152	-7.40735	0.741079	-9.99535	1.59717e-23	4.27192e-22
Zfhx3	686.397	1.65306	0.165414	9.99349	1.62753e-23	4.34533e-22
6430548M08Rik	77.772	3.65866	0.366495	9.98284	1.81198e-23	4.82913e-22
Six2	365.057	-2.00845	0.201346	-9.97509	1.95916e-23	5.21206e-22
Ephx1	692.582	-3.39012	0.339937	-9.97279	2.00522e-23	5.32509e-22
Itsn1	585.655	4.17317	0.418813	9.96429	2.18431e-23	5.79036e-22
Vcpip1	365.134	2.04684	0.205516	9.95951	2.29183e-23	6.0646e-22
Cdc25a	1103.47	-1.51911	0.15255	-9.95808	2.32516e-23	6.14188e-22
Gbp9	1904.1	-1.14358	0.115071	-9.93803	2.84387e-23	7.49876e-22
Als2	755.614	-1.20603	0.121452	-9.93012	3.07881e-23	8.1039e-22
Lyrm9	460.263	1.59409	0.160659	9.9222	3.33339e-23	8.75852e-22
Cdkn2a	73.3837	6.31873	0.637436	9.91273	3.66511e-23	9.61316e-22
Rcbtb2	471.663	-1.71643	0.173164	-9.91212	3.68724e-23	9.65421e-22
Hnrnpab	10230.2	-1.55755	0.157233	-9.90599	3.92082e-23	1.02478e-21
Stx16	288.694	3.47944	0.351321	9.90388	4.00431e-23	1.04477e-21
Socs4	3801.54	8.03538	0.811814	9.89806	4.24442e-23	1.10548e-21
Gm19589	153.397	6.55769	0.662757	9.89456	4.39521e-23	1.14275e-21
Hsf4	81.8598	3.35547	0.339379	9.88708	4.73622e-23	1.22927e-21
Tmlhe	596.926	-4.51407	0.456605	-9.88617	4.77967e-23	1.23839e-21
Trim31	529.905	1.3078	0.13239	9.87837	5.16683e-23	1.33638e-21
Armcx4	307.055	-1.4521	0.147084	-9.87261	5.47214e-23	1.41289e-21
Trex1	83.0774	6.66725	0.675828	9.86531	5.88529e-23	1.51694e-21
Palm	109.794	5.75051	0.583448	9.85608	6.45215e-23	1.66018e-21
Cd180	118.418	5.358	0.544232	9.84506	7.19966e-23	1.84932e-21
Chst15	395.134	-2.08364	0.211708	-9.84208	7.41609e-23	1.90163e-21
Hnrnph1	8123.5	-1.01623	0.103303	-9.83734	7.77382e-23	1.98994e-21
Fli1	1745.8	1.20401	0.122511	9.82773	8.55247e-23	2.1855e-21
Stx8	964.847	-1.30017	0.13253	-9.81037	1.01592e-22	2.59163e-21
Lmna	954.023	3.7936	0.387159	9.79857	1.14192e-22	2.90808e-21
Bcl9	481.076	-2.93832	0.299926	-9.7968	1.1621e-22	2.95444e-21
Rasal1	8727.71	1.20511	0.123077	9.79147	1.22508e-22	3.10923e-21
Zcchc14	99.3675	-7.3375	0.750165	-9.78118	1.35616e-22	3.4344e-21
Zcrb1	1828.1	-0.75828	0.0775254	-9.78106	1.35781e-22	3.4344e-21
Gm5124	103.898	4.4791	0.458095	9.77766	1.40424e-22	3.54581e-21
Stk35	103.872	6.60076	0.676075	9.76335	1.61717e-22	4.07658e-21
Prkch	436.272	3.13191	0.32083	9.7619	1.64051e-22	4.12843e-21
Rbbp6	5862.41	-1.6065	0.164584	-9.76099	1.65531e-22	4.15864e-21
Slc43a1	141.374	7.2961	0.747725	9.75773	1.70942e-22	4.28736e-21
Spred3	387.495	-1.49237	0.153026	-9.75238	1.80192e-22	4.51176e-21
Gfpt1	1548.9	0.890529	0.091323	9.75143	1.81892e-22	4.54669e-21
Slc28a2	95.8056	-4.63122	0.475276	-9.74428	1.95154e-22	4.87003e-21
Col27a1	119.076	-3.17661	0.326309	-9.73497	2.13873e-22	5.32823e-21
Clock	1022.74	1.14922	0.118053	9.73475	2.1434e-22	5.33094e-21
Cyp4v3	329.636	3.09705	0.318185	9.73348	2.17042e-22	5.38915e-21
Trabd	2405.85	-1.30893	0.134485	-9.73291	2.18268e-22	5.41059e-21
Pla2g2a	898.063	2.53488	0.260553	9.72885	2.27149e-22	5.62137e-21
Glrx	234.211	1.79043	0.184325	9.71344	2.64263e-22	6.52901e-21
Trim38	158.638	2.49644	0.257022	9.71293	2.65579e-22	6.55067e-21
Lrrc75b	604.133	3.28644	0.338518	9.70833	2.77841e-22	6.84177e-21
Atp6v0a1	141.788	4.2769	0.440655	9.70578	2.84885e-22	7.00367e-21
Cd300ld	68.331	6.49571	0.669501	9.7023	2.94768e-22	7.23469e-21
Iqgap2	4077.89	2.0336	0.20966	9.6995	3.02971e-22	7.42378e-21
Tmem30c	3711.11	1.30322	0.134525	9.68753	3.40663e-22	8.33365e-21
Nebl	7672.89	1.86928	0.193008	9.68495	3.4938e-22	8.5329e-21
Socs5	2191.03	2.62974	0.27154	9.68452	3.50856e-22	8.55491e-21
Rps19	5584.94	-1.31061	0.135423	-9.67793	3.74211e-22	9.10947e-21
Glipr1	872.47	1.53277	0.158484	9.67148	3.98587e-22	9.68703e-21
Setd1a	3515.91	-0.892167	0.0922503	-9.67116	3.99821e-22	9.70119e-21
Bbs9	1143.03	2.3933	0.247673	9.66315	4.32352e-22	1.04735e-20
Sema5b	72.8873	-3.48324	0.360524	-9.66162	4.38888e-22	1.06092e-20
Zfp35	67.3101	6.48226	0.670937	9.6615	4.39379e-22	1.06092e-20
Mbnl2	215.958	1.92285	0.199031	9.66109	4.41164e-22	1.06351e-20
Tk1	203.634	3.43253	0.355308	9.66072	4.42731e-22	1.06556e-20
Cipc	1284.28	1.48872	0.15445	9.6388	5.48264e-22	1.31742e-20
Trpm4	121.712	7.51807	0.780714	9.62975	5.98759e-22	1.43644e-20
Rmdn2	3463.83	-1.33548	0.138705	-9.6282	6.07865e-22	1.45595e-20
Lrrc1	359.974	-1.77111	0.183964	-9.62745	6.123e-22	1.46421e-20
Smurf2	378.119	1.68389	0.174936	9.62576	6.22455e-22	1.48611e-20
Tmem177	187.159	2.77482	0.288731	9.61043	7.22477e-22	1.72215e-20
Irak2	453.993	2.41724	0.251707	9.60339	7.73547e-22	1.84094e-20
Il1b	121.551	6.66579	0.69492	9.59217	8.62506e-22	2.04938e-20
Hdgfrp3	1300.7	1.49036	0.155413	9.58968	8.836e-22	2.09282e-20
Txlnb	3723.46	2.50257	0.260965	9.58969	8.83482e-22	2.09282e-20
Atn1	4538.02	1.81643	0.189446	9.58809	8.97269e-22	2.12183e-20
Cx3cr1	377.924	3.38608	0.353197	9.58693	9.07439e-22	2.14248e-20
Clec4a1	58.7114	4.73269	0.493944	9.58143	9.57089e-22	2.25612e-20
Rbx1	248.747	5.82492	0.608101	9.57887	9.81122e-22	2.30912e-20
B4galt4	175.889	3.97754	0.415308	9.57732	9.95961e-22	2.34035e-20
Csrp1	2055.9	-1.56915	0.163941	-9.57139	1.0548e-21	2.47081e-20
Srsf10	5700.58	-0.848002	0.0885963	-9.57152	1.05341e-21	2.47081e-20
Atxn10	1711.62	-1.0865	0.113585	-9.5655	1.1166e-21	2.61147e-20
Myb	1791.61	7.84456	0.820478	9.56097	1.16663e-21	2.72421e-20
Mzf1	123.456	-4.68888	0.490441	-9.56053	1.17155e-21	2.73143e-20
Emr1	129.223	6.91646	0.725142	9.53807	1.45516e-21	3.38734e-20
Trp53inp1	2116.83	-1.1387	0.119416	-9.53558	1.49051e-21	3.46421e-20
Pim1	68.896	6.79105	0.712642	9.52939	1.5821e-21	3.67135e-20
Pdgfd	504.346	3.55089	0.372868	9.52319	1.6795e-21	3.89131e-20
Ano6	3699.9	-1.44105	0.151538	-9.50948	1.91613e-21	4.43268e-20
Rev1	86.0492	6.3931	0.672419	9.50762	1.95081e-21	4.50593e-20
Chchd3	2098.24	-1.25245	0.131762	-9.50539	1.99305e-21	4.59635e-20
Mios	1052.64	-1.67278	0.176018	-9.50345	2.03053e-21	4.67555e-20
Arsb	2620	3.60784	0.379652	9.50303	2.03879e-21	4.68734e-20
Apol10b	145.08	5.62764	0.59231	9.50117	2.07552e-21	4.76441e-20
Tnfrsf11b	216.091	1.81729	0.191331	9.49811	2.13732e-21	4.89873e-20
Dbf4	1368.3	-1.45549	0.153244	-9.49787	2.1422e-21	4.90238e-20
Ptprb	614.319	1.20225	0.126625	9.49459	2.2108e-21	5.05162e-20
Bbs12	209.477	1.96269	0.206967	9.48307	2.46902e-21	5.633e-20
Klc3	95.729	-2.79564	0.294862	-9.48116	2.51474e-21	5.72853e-20
Prpsap2	2960.5	-1.03252	0.108997	-9.47291	2.72148e-21	6.19001e-20
Cd36	180.69	6.26594	0.661682	9.46972	2.80603e-21	6.36985e-20
Fbxl2	101.348	3.23831	0.341969	9.4696	2.80909e-21	6.36985e-20
Naaladl1	464.72	3.65668	0.386157	9.46942	2.81396e-21	6.36999e-20
Slc9b2	872.052	1.00865	0.106518	9.46928	2.81771e-21	6.36999e-20
Endod1	446.469	2.08839	0.220838	9.45663	3.18041e-21	7.17906e-20
Hdac2	2372.96	-1.01112	0.107049	-9.44542	3.53979e-21	7.97818e-20
Kifc3	689.602	1.87314	0.198356	9.44332	3.61153e-21	8.12758e-20
Cntrob	879.727	-1.64994	0.174754	-9.44151	3.67441e-21	8.25662e-20
Plcb1	352.073	5.59459	0.593234	9.43066	4.07506e-21	9.14311e-20
Rrbp1	179.884	2.22517	0.236055	9.42652	4.23905e-21	9.49674e-20
Itgax	561.097	5.50974	0.584828	9.42113	4.46251e-21	9.98236e-20
Samd12	322.312	1.65644	0.175988	9.41223	4.85721e-21	1.0849e-19
Faim3	133.018	7.14442	0.759519	9.4065	5.12932e-21	1.14396e-19
Gmfb	2940.83	0.691623	0.0735806	9.39954	5.48039e-21	1.22043e-19
Srsf5	4748.09	-1.00293	0.106781	-9.39245	5.86179e-21	1.30342e-19
Abhd2	1974.55	1.74077	0.185342	9.39222	5.87503e-21	1.30442e-19
Ube2g1	728.909	-1.69177	0.18014	-9.39141	5.92038e-21	1.31253e-19
Phf3	150.642	2.87246	0.305938	9.38905	6.05417e-21	1.34019e-19
Fn1	160.199	4.25297	0.453606	9.37591	6.85824e-21	1.51593e-19
2810474O19Rik	4858.38	2.17619	0.232264	9.36947	7.28992e-21	1.60897e-19
Ppp1r2	71.3806	-6.55794	0.700559	-9.36101	7.89745e-21	1.74048e-19
Ndor1	163.875	5.12498	0.547531	9.36017	7.96109e-21	1.75191e-19
Cdca8	1189.47	-2.67437	0.286016	-9.35045	8.72792e-21	1.91783e-19
Lat	9531.51	-1.02487	0.109616	-9.34965	8.79389e-21	1.92948e-19
Fut7	67.2041	3.44245	0.368198	9.34946	8.80975e-21	1.93011e-19
Plaa	75.9149	7.20519	0.770975	9.34556	9.14079e-21	1.9997e-19
Strip1	1262.42	-1.46283	0.156574	-9.34279	9.38321e-21	2.04972e-19
Abhd14b	210.883	1.76178	0.188779	9.33246	1.03439e-20	2.25627e-19
Tgm4	172.489	6.50853	0.697624	9.32957	1.06305e-20	2.3154e-19
Msi2	2211.26	-1.26874	0.136028	-9.32702	1.08891e-20	2.36825e-19
Gpr63	58.7627	7.08187	0.759309	9.32674	1.09175e-20	2.37098e-19
Dhrs7	450.855	1.70269	0.182621	9.32365	1.12403e-20	2.43752e-19
Lrr1	147.306	-2.34738	0.251847	-9.32068	1.156e-20	2.50321e-19
Cpeb3	53.2797	4.01894	0.43265	9.28913	1.55562e-20	3.36365e-19
Theg	97.6157	3.67974	0.396162	9.28848	1.56514e-20	3.37933e-19
Znrf4	2707.34	1.16542	0.125481	9.28764	1.57748e-20	3.40106e-19
Nop14	5752.77	-0.878761	0.0946213	-9.28714	1.58489e-20	3.4121e-19
Phtf1	391.068	-1.85318	0.199578	-9.2855	1.60954e-20	3.46015e-19
Mpp4	84.5126	5.66317	0.610367	9.27829	1.72213e-20	3.69686e-19
Lpp	879.85	1.26608	0.136499	9.27541	1.76943e-20	3.79294e-19
Prss33	100.55	4.30377	0.465029	9.25484	2.14559e-20	4.59267e-19
Chsy1	3780.37	3.01312	0.325655	9.25249	2.1933e-20	4.68807e-19
Lrrk2	194.726	5.61066	0.606563	9.24993	2.24646e-20	4.79482e-19
Ppp1r9b	1184.5	-1.3463	0.145591	-9.24717	2.30523e-20	4.9132e-19
Gab2	55.2557	3.65057	0.3951	9.23961	2.47391e-20	5.26518e-19
Pebp1	3035.24	1.98229	0.214564	9.23866	2.49597e-20	5.30456e-19
Arntl	552.588	-1.19932	0.129822	-9.23819	2.50696e-20	5.32032e-19
Rasl2-9	135.033	-3.66156	0.396404	-9.23695	2.53613e-20	5.37458e-19
Thpo	1009.93	-1.10426	0.11968	-9.22674	2.78996e-20	5.90409e-19
Commd1	464.883	-1.26769	0.137404	-9.226	2.80936e-20	5.93672e-19
Tmem165	97.203	4.95049	0.536591	9.22582	2.81389e-20	5.93786e-19
Itga3	102.453	2.69458	0.292094	9.22504	2.8346e-20	5.97311e-19
Mefv	118.595	5.63323	0.61075	9.22347	2.87631e-20	6.05245e-19
Ppp3cc	999.246	1.33451	0.144731	9.22067	2.9525e-20	6.204e-19
Tubb4a	240.384	-5.02781	0.545405	-9.21848	3.0134e-20	6.32304e-19
Usp11	2577.65	-1.81848	0.197272	-9.21816	3.02243e-20	6.33308e-19
Hsd11b1	1565.36	1.69126	0.183515	9.21589	3.08705e-20	6.45938e-19
Ctsh	142.15	5.09639	0.553179	9.21291	3.17388e-20	6.63177e-19
Thg1l	187.191	4.98015	0.540614	9.21202	3.20058e-20	6.67818e-19
Ifngr2	674.001	-3.17459	0.344626	-9.21172	3.20935e-20	6.68713e-19
Nrros	595.6	-2.30174	0.249939	-9.20921	3.28524e-20	6.83569e-19
Cd3g	8384.72	-0.950707	0.10324	-9.20872	3.30047e-20	6.8578e-19
Gm9199	112.775	3.68159	0.399856	9.20729	3.34448e-20	6.93957e-19
AI467606	2507.84	1.92197	0.208791	9.20526	3.4085e-20	7.06255e-19
2700029M09Rik	993.95	-1.18241	0.128526	-9.19976	3.58766e-20	7.42347e-19
Cd5	2665.6	-1.41937	0.154364	-9.19496	3.75123e-20	7.75115e-19
Upk1b	738.354	-0.967358	0.105237	-9.19217	3.84983e-20	7.94387e-19
BC048403	274.076	1.59924	0.173997	9.1912	3.8848e-20	8.00494e-19
Fbxo4	208.348	1.70188	0.185173	9.19074	3.90134e-20	8.02792e-19
Pask	83.5003	5.75805	0.62665	9.18862	3.97931e-20	8.17706e-19
Usp34	1524.12	1.15051	0.125239	9.18648	4.0592e-20	8.32976e-19
Prss8	70.8043	-5.63622	0.613845	-9.18182	4.23864e-20	8.686e-19
U90926	4465.43	-0.843813	0.0919386	-9.17801	4.39138e-20	8.98664e-19
Nudcd2	1562.51	-1.78333	0.194393	-9.17387	4.56324e-20	9.32554e-19
Pld6	266.65	3.00136	0.327337	9.169	4.77416e-20	9.74322e-19
Sec14l4	81.5242	4.82127	0.525887	9.16788	4.8241e-20	9.83166e-19
Tbc1d1	1117.92	0.826187	0.0901221	9.16742	4.84482e-20	9.8604e-19
Gosr1	1938.64	1.20979	0.131993	9.16551	4.93136e-20	1.00228e-18
Ids	1044.05	1.22711	0.133887	9.16527	4.94249e-20	1.00318e-18
Ssh3	472.157	1.54326	0.168454	9.16134	5.12549e-20	1.03891e-18
Ptpn6	1472.15	2.60603	0.284704	9.15345	5.51457e-20	1.11625e-18
Kdm7a	2665.46	1.24422	0.135963	9.15117	5.63188e-20	1.13845e-18
Ppp2cb	7310.09	1.48684	0.162499	9.14984	5.70166e-20	1.15099e-18
Pdcd2l	87.3324	2.81471	0.307793	9.1448	5.97391e-20	1.20432e-18
Plaur	159.235	5.99273	0.655569	9.14127	6.17258e-20	1.24269e-18
Maoa	96.9958	-4.35147	0.476087	-9.14006	6.24188e-20	1.25495e-18
Cd244	83.2991	5.74639	0.628875	9.13757	6.38727e-20	1.28245e-18
Tdrkh	676.382	4.53405	0.496338	9.13499	6.54115e-20	1.31158e-18
Hcst	762.992	1.17537	0.128672	9.1346	6.56512e-20	1.31461e-18
Wdfy1	224.115	1.74878	0.19147	9.13341	6.63731e-20	1.32728e-18
Itgad	137.811	4.8399	0.530575	9.12199	7.37595e-20	1.47302e-18
Tnfrsf26	116.452	3.98471	0.437075	9.11676	7.74038e-20	1.54372e-18
Rara	474.599	3.14317	0.345377	9.10071	8.97433e-20	1.78743e-18
Gar1	634.726	-1.25152	0.137526	-9.10026	9.01189e-20	1.79251e-18
Ifngr1	7872.17	1.97967	0.217557	9.09951	9.07407e-20	1.80247e-18
Rcsd1	136.918	-2.90213	0.318979	-9.09819	9.18463e-20	1.82201e-18
Endou	1561.31	-7.01634	0.771311	-9.09665	9.31622e-20	1.84565e-18
Gbp7	3526.76	1.45696	0.160215	9.09378	9.5653e-20	1.89248e-18
Pp2d1	1741.27	2.20721	0.242855	9.08862	1.00306e-19	1.9819e-18
Cpsf3l	1314.59	-1.29933	0.142986	-9.08713	1.01692e-19	2.00663e-18
Tnfrsf25	188.85	2.09975	0.23135	9.07603	1.12602e-19	2.21898e-18
Hp	87.499	6.50624	0.717393	9.06928	1.1981e-19	2.35791e-18
Neurod1	3074.99	1.85355	0.204414	9.06762	1.21647e-19	2.39089e-18
Zmym5	1282.43	-1.21716	0.134345	-9.05996	1.30501e-19	2.56154e-18
Ubl4b	1665.46	0.990623	0.109358	9.05854	1.32212e-19	2.5917e-18
Cpne3	2141.09	2.6814	0.296067	9.0567	1.34453e-19	2.63218e-18
Vsig2	47.5559	4.65513	0.514841	9.04186	1.54022e-19	3.0113e-18
Mbnl3	20159.8	0.726707	0.0804809	9.02956	1.72361e-19	3.36544e-18
Cyp4f16	144.087	3.02792	0.335414	9.02742	1.75766e-19	3.42743e-18
Pik3r3	5004.98	1.53721	0.170317	9.02555	1.78792e-19	3.48189e-18
Snhg7	765.097	-1.70144	0.188527	-9.02495	1.79772e-19	3.4964e-18
Ppp3r2	2061.01	2.05654	0.227939	9.02234	1.84116e-19	3.57622e-18
Nalcn	54.3467	6.93733	0.769291	9.01782	1.91872e-19	3.72201e-18
Naa25	953.684	-0.960779	0.106593	-9.01355	1.99489e-19	3.86475e-18
Phip	1520.68	-1.30114	0.14437	-9.01249	2.01426e-19	3.8972e-18
C3	115.883	5.559	0.616937	9.01065	2.04838e-19	3.95807e-18
Pygl	604.723	-1.53062	0.16992	-9.00785	2.1014e-19	4.05526e-18
Ngb	1145.9	-0.94141	0.104521	-9.00693	2.11912e-19	4.08417e-18
Cdkn1a	291.384	3.72414	0.413537	9.00556	2.14561e-19	4.12989e-18
Ttc30a2	3396.6	-1.13415	0.125954	-9.00448	2.16681e-19	4.16532e-18
Ptn	11485.4	-1.90256	0.211311	-9.00363	2.18377e-19	4.1925e-18
Ppp3ca	1925.32	-0.910726	0.101158	-9.00298	2.19678e-19	4.21204e-18
Ddx39b	7190.68	-0.741532	0.0823726	-9.00217	2.21301e-19	4.23771e-18
Primpol	670.957	-1.45068	0.161171	-9.00087	2.23941e-19	4.28276e-18
Sgk3	2577.22	1.74919	0.194497	8.9934	2.39687e-19	4.57802e-18
Pias2	54.1	4.89854	0.545076	8.98688	2.54344e-19	4.85174e-18
Tal1	10277.7	1.56868	0.174685	8.98002	2.70705e-19	5.15725e-18
Xkr4	753.202	7.29944	0.813418	8.97379	2.8649e-19	5.45099e-18
Hmgcs2	65.0391	-6.03459	0.672884	-8.96824	3.01277e-19	5.72503e-18
Apitd1	181.996	-2.98876	0.333292	-8.96738	3.03644e-19	5.76266e-18
Gna15	131.555	3.7939	0.423334	8.96196	3.1897e-19	6.04582e-18
Tubd1	23016.5	-1.42418	0.159237	-8.94377	3.76112e-19	7.11984e-18
Nrarp	157.488	2.33241	0.260798	8.94336	3.77515e-19	7.13734e-18
Snrpe	979.975	-1.13938	0.127417	-8.94211	3.81802e-19	7.20924e-18
Selo	11538.2	1.37112	0.153463	8.93456	4.08808e-19	7.70939e-18
Gramd3	9312.75	2.36622	0.264922	8.93175	4.19304e-19	7.89733e-18
Antxr2	1163.4	2.68205	0.300472	8.92612	4.41204e-19	8.29931e-18
Panx2	1220.27	-1.74579	0.195627	-8.9241	4.49333e-19	8.44157e-18
Dhx58	684.247	-0.994801	0.111524	-8.92007	4.65988e-19	8.74344e-18
Tlr8	133.979	2.20037	0.246984	8.90896	5.15115e-19	9.65305e-18
Rccd1	1274.43	-2.41616	0.271339	-8.90458	5.35908e-19	1.00301e-17
Clec7a	61.4443	6.54328	0.73503	8.90206	5.48196e-19	1.02472e-17
Lsm3	677.192	-1.51955	0.170757	-8.89889	5.64063e-19	1.05306e-17
Wdfy3	645.152	2.21131	0.248579	8.89581	5.79952e-19	1.08137e-17
Rps3	2927.12	-0.810337	0.0911403	-8.8911	6.05088e-19	1.12682e-17
Ap3s1	710.596	-1.91329	0.215321	-8.88578	6.34764e-19	1.18061e-17
Acoxl	100.738	2.39048	0.269135	8.88206	6.56324e-19	1.21919e-17
Lad1	168.89	-4.98378	0.561122	-8.88182	6.57762e-19	1.22034e-17
Klhl6	4061.18	1.58064	0.178087	8.87567	6.95122e-19	1.28805e-17
Rnf130	71.3122	6.99858	0.789119	8.86886	7.38996e-19	1.36765e-17
Ifng	209.239	4.62843	0.521904	8.86835	7.42409e-19	1.37226e-17
Fn3k	101.079	3.73199	0.420926	8.86614	7.57285e-19	1.39802e-17
2810417H13Rik	2700.99	-2.66727	0.300907	-8.8641	7.71214e-19	1.42197e-17
A430078G23Rik	2007.98	1.55193	0.17522	8.85706	8.215e-19	1.51282e-17
1700017B05Rik	1219.19	-2.27549	0.257049	-8.85238	8.56718e-19	1.57573e-17
Taf8	688.943	-1.26682	0.143205	-8.84623	9.05216e-19	1.66287e-17
Tmem63c	1116.09	0.854493	0.0966017	8.84553	9.10978e-19	1.6714e-17
Fcgr4	65.3771	6.94982	0.785921	8.84289	9.32711e-19	1.70917e-17
Tmprss11a	8560.94	-1.38129	0.156352	-8.83447	1.00576e-18	1.84077e-17
D730005E14Rik	83.4111	2.51825	0.285123	8.83215	1.02681e-18	1.87699e-17
Trabd2b	2421.08	-1.19438	0.135264	-8.83	1.04677e-18	1.91112e-17
Rrp15	4030.44	-0.841754	0.095332	-8.82971	1.0495e-18	1.91376e-17
Chil3	132.043	7.20953	0.816738	8.82723	1.07305e-18	1.95431e-17
Cd82	4057.53	0.949118	0.107608	8.82014	1.14312e-18	2.07939e-17
Gpr83	74.7802	-6.09702	0.691859	-8.81252	1.22361e-18	2.22309e-17
Homer3	117.822	-2.33803	0.265376	-8.81025	1.2487e-18	2.26591e-17
Pilrb2	44.7013	5.28416	0.599785	8.81009	1.25048e-18	2.26637e-17
Zfp866	146.081	2.0987	0.238238	8.80926	1.25974e-18	2.28039e-17
Stab2	212.488	4.85086	0.551037	8.80315	1.3303e-18	2.40519e-17
L1cam	290.49	1.85441	0.210688	8.8017	1.34758e-18	2.43348e-17
Uap1l1	75.1041	-6.42839	0.731092	-8.79286	1.45804e-18	2.62976e-17
D10Wsu102e	1826.45	-1.0451	0.118891	-8.79038	1.49059e-18	2.68523e-17
Pdcd6	7078.15	1.06704	0.121394	8.78992	1.49665e-18	2.69288e-17
Rad9a	470.358	-1.97759	0.224987	-8.78977	1.49861e-18	2.69316e-17
Sf3a3	3199.49	-0.740947	0.0843311	-8.78617	1.54746e-18	2.77759e-17
Hip1r	1644.96	1.2235	0.139268	8.78519	1.56095e-18	2.79843e-17
C920009B18Rik	415.905	1.63891	0.186571	8.78436	1.57255e-18	2.81585e-17
Pm20d2	327.411	-2.80185	0.319213	-8.77738	1.67325e-18	2.99257e-17
Cd300e	47.6676	6.78686	0.774063	8.76784	1.82126e-18	3.25338e-17
Itgb1	6138.11	1.90466	0.217263	8.76662	1.84114e-18	3.28494e-17
Unkl	633.673	-1.88389	0.214954	-8.76416	1.88179e-18	3.35346e-17
Mbtd1	979.179	-0.902792	0.103044	-8.76125	1.93101e-18	3.43705e-17
Erlin2	754.228	1.12875	0.128938	8.75423	2.05495e-18	3.65331e-17
Cyp4f18	62.0627	5.73844	0.655594	8.75305	2.07663e-18	3.68744e-17
Hivep3	727.075	-2.86363	0.327179	-8.75249	2.08691e-18	3.70128e-17
4930486L24Rik	237.743	3.28945	0.37584	8.75225	2.09135e-18	3.70475e-17
Tmem56	995.303	3.1813	0.363538	8.75093	2.116e-18	3.74397e-17
Tktl1	929.115	1.33391	0.152558	8.74362	2.25754e-18	3.98965e-17
Bscl2	1104.26	1.18443	0.135557	8.7375	2.38332e-18	4.20696e-17
Slc25a25	995.315	-1.58138	0.181046	-8.73467	2.44361e-18	4.30828e-17
Txnl4a	23806.5	2.33492	0.267393	8.73215	2.49874e-18	4.40026e-17
Speer1-ps1	196.757	3.53093	0.404457	8.73006	2.5453e-18	4.47696e-17
Unc119b	1212.27	-1.30797	0.149961	-8.72206	2.73189e-18	4.79949e-17
Nfatc3	3189.91	2.08185	0.238757	8.71952	2.79385e-18	4.90257e-17
Klf3	3391.35	1.97463	0.226549	8.71613	2.87868e-18	5.04549e-17
4921525O09Rik	105.039	-5.25512	0.603093	-8.7136	2.94361e-18	5.15323e-17
Fkbp5	3912.42	-2.31391	0.265572	-8.7129	2.96191e-18	5.17918e-17
Efr3a	4481.8	0.905503	0.103933	8.71236	2.9761e-18	5.19789e-17
St3gal4	231.774	2.91625	0.334887	8.70815	3.08868e-18	5.3882e-17
Pds5a	581.789	1.07299	0.123239	8.70655	3.13266e-18	5.45853e-17
Zer1	154.281	3.71064	0.426237	8.70556	3.16001e-18	5.49975e-17
Lef1	4875.93	-0.851674	0.0978441	-8.70439	3.19282e-18	5.55037e-17
Ankrd26	652.314	-0.971879	0.111692	-8.70143	3.27731e-18	5.6906e-17
Gimap8	6332.21	1.19404	0.137253	8.69956	3.33187e-18	5.7786e-17
Nap1l3	5267.02	-1.43705	0.165371	-8.68987	3.62859e-18	6.28591e-17
Stat5a	4876.47	1.21499	0.139953	8.68146	3.90729e-18	6.76083e-17
Cers4	481.85	1.93183	0.222641	8.67687	4.06825e-18	7.03119e-17
Phf20l1	3467.09	-1.11915	0.12907	-8.67088	4.28805e-18	7.40248e-17
Cep85	874.739	-1.13718	0.131181	-8.66878	4.36792e-18	7.53163e-17
Arel1	1725.15	0.840642	0.0970119	8.66535	4.50139e-18	7.7528e-17
Tcf7	3589.87	-0.866177	0.100034	-8.65883	4.7664e-18	8.19975e-17
Ptpn23	147.592	2.36217	0.272853	8.65732	4.82974e-18	8.29912e-17
D430019H16Rik	459.806	7.1886	0.830422	8.65656	4.86235e-18	8.34554e-17
Unc13a	465.74	2.08648	0.241038	8.6562	4.87771e-18	8.36227e-17
Lmo4	686.225	-1.38576	0.160139	-8.6535	4.9943e-18	8.55231e-17
Sh3pxd2a	1200.92	-0.80909	0.0935155	-8.65194	5.06329e-18	8.6605e-17
Xlr3a	173.571	-4.09523	0.473355	-8.6515	5.08253e-18	8.68344e-17
Rreb1	2587.5	1.40772	0.162744	8.64989	5.15494e-18	8.79706e-17
Kdm6b	2047.71	-1.2145	0.140431	-8.64838	5.22367e-18	8.90414e-17
Galk1	636.735	-1.782	0.206227	-8.64098	5.57339e-18	9.48941e-17
Rnaset2b	1744.89	1.21264	0.140366	8.63912	5.66472e-18	9.63391e-17
Glipr2	9390.04	2.86029	0.331155	8.63732	5.75482e-18	9.77597e-17
H2-Q2	311.832	-3.35715	0.388884	-8.63278	5.9878e-18	1.01602e-16
Arl5a	1931.97	1.51037	0.175013	8.63006	6.13178e-18	1.03926e-16
Rab3gap2	873.337	2.48774	0.288299	8.62904	6.18708e-18	1.04744e-16
Trhde	219.187	4.64492	0.5385	8.62566	6.37249e-18	1.07761e-16
Ern1	295.473	1.94187	0.225182	8.62355	6.49073e-18	1.09636e-16
Fam160a2	1157.26	1.74279	0.202168	8.62053	6.66428e-18	1.1244e-16
Mmrn2	123.756	5.88315	0.682471	8.62036	6.67434e-18	1.12482e-16
Hexb	1037.86	0.847355	0.0983272	8.6177	6.83095e-18	1.14991e-16
Gprasp2	63.0641	-4.00917	0.465555	-8.61159	7.20513e-18	1.21153e-16
Naprt1	204.464	2.37135	0.275678	8.60186	7.84357e-18	1.3174e-16
Ap2b1	4544.06	0.823909	0.0958291	8.59769	8.13333e-18	1.36453e-16
Abi3	717.042	-1.4397	0.16747	-8.59676	8.19986e-18	1.37415e-16
Acsbg1	1153.34	2.914	0.339243	8.58972	8.71807e-18	1.45935e-16
Hfe	57.622	4.64437	0.540785	8.58821	8.83363e-18	1.47703e-16
Phf11c	79.525	3.91414	0.455968	8.58426	9.14267e-18	1.52699e-16
Lmnb2	1193.12	-1.08635	0.12656	-8.58371	9.18633e-18	1.53256e-16
Whsc1l1	444.277	-2.36546	0.275604	-8.58283	9.25677e-18	1.54259e-16
Hmgcr	1716.04	-0.789514	0.0920153	-8.58025	9.46683e-18	1.57583e-16
Khnyn	2393.14	1.19158	0.138897	8.57888	9.58042e-18	1.59296e-16
Oxsr1	1199.49	1.03114	0.120267	8.57381	1.00117e-17	1.66281e-16
Hnrnpl	7831.22	-0.705232	0.0822739	-8.57175	1.01921e-17	1.69089e-16
Khdrbs1	4133.25	-1.09312	0.127545	-8.57051	1.03026e-17	1.70733e-16
F730043M19Rik	43.3346	4.28026	0.499553	8.56817	1.05139e-17	1.7404e-16
Pdss1	5047.12	-0.852508	0.0995076	-8.56727	1.0597e-17	1.75221e-16
Pcbd2	4270.86	1.9044	0.222302	8.56673	1.06466e-17	1.75845e-16
Wap	45.5555	6.25934	0.730783	8.56526	1.07835e-17	1.7791e-16
Bcdin3d	168.218	1.68718	0.19715	8.55785	1.14993e-17	1.8951e-16
Aim1l	81.0054	-3.24046	0.378884	-8.55265	1.20299e-17	1.98035e-16
Zg16	87.9789	-3.2655	0.381847	-8.55184	1.21138e-17	1.99196e-16
Atp13a3	5121.96	-0.793463	0.0928163	-8.54875	1.24431e-17	2.04386e-16
Uck2	1057.6	-1.30857	0.15317	-8.54323	1.30516e-17	2.14145e-16
Serpina3h	60.6981	6.79998	0.795982	8.54289	1.30909e-17	2.14553e-16
Fbln1	54.3997	-6.16739	0.722464	-8.53661	1.38213e-17	2.26275e-16
Hmgn1	1639.83	-1.17864	0.138218	-8.52738	1.49703e-17	2.44816e-16
Ube2n	460.939	4.90255	0.575034	8.52568	1.51914e-17	2.48159e-16
Tube1	92.9381	2.49813	0.293042	8.52483	1.5304e-17	2.49725e-16
Uhrf1bp1l	4089.45	-2.39284	0.280896	-8.51861	1.6148e-17	2.63209e-16
Ikbkg	1628.95	0.819874	0.0962471	8.51843	1.61732e-17	2.63331e-16
Nphp4	80.0608	-3.53341	0.414861	-8.5171	1.63598e-17	2.66079e-16
Dcakd	413.103	-1.18017	0.138671	-8.5106	1.73036e-17	2.81122e-16
Tox3	990.584	-1.33042	0.156346	-8.50946	1.74752e-17	2.836e-16
Zxdc	180.012	1.65353	0.194354	8.50785	1.77186e-17	2.87238e-16
Fam83h	49.1937	3.74026	0.4402	8.49675	1.94978e-17	3.15395e-16
Rnf151	606.176	-1.38125	0.16256	-8.49684	1.94819e-17	3.15395e-16
Tigd3	89.4081	3.11932	0.367254	8.49365	2.00248e-17	3.23568e-16
Cd47	3827.35	1.15611	0.136126	8.49298	2.01413e-17	3.25097e-16
Redrum	474.362	-2.11107	0.248635	-8.49063	2.05521e-17	3.31369e-16
Gpr162	135.342	-4.8762	0.574533	-8.48723	2.11614e-17	3.40824e-16
Nfe2l2	94.7057	5.14657	0.606675	8.48325	2.18988e-17	3.5232e-16
Hps3	1335.49	0.93116	0.109773	8.48262	2.20184e-17	3.53862e-16
Snhg8	354.866	-1.56427	0.184498	-8.47848	2.28161e-17	3.66286e-16
Ralgps2	652.421	2.07462	0.244769	8.47583	2.33409e-17	3.74308e-16
Rabggta	2397.26	1.68221	0.198543	8.47277	2.39635e-17	3.8388e-16
Tram2	4198.41	0.745631	0.088045	8.46876	2.48026e-17	3.96896e-16
Plxdc1	88.6028	3.48893	0.412013	8.468	2.49641e-17	3.99051e-16
Fcer2a	93.1985	5.75201	0.679657	8.46311	2.60343e-17	4.15711e-16
H2-K1	38856.6	1.07864	0.127459	8.4626	2.61485e-17	4.17088e-16
Gas5	4182.72	-1.28878	0.152579	-8.44661	2.99874e-17	4.7781e-16
Uqcrb	741.471	-1.31705	0.155968	-8.44437	3.05702e-17	4.86576e-16
Polr2f	742.255	-1.34837	0.159777	-8.43904	3.19954e-17	5.08716e-16
Taok2	1270.86	-1.16651	0.138272	-8.4363	3.2755e-17	5.20238e-16
Errfi1	352.824	1.33634	0.158429	8.43492	3.31415e-17	5.25817e-16
Il13ra1	49.1589	4.98903	0.591991	8.42754	3.53009e-17	5.59482e-16
Nxph1	45.0383	5.40842	0.641907	8.42555	3.59054e-17	5.68457e-16
Fgr	380.435	1.90259	0.22588	8.42301	3.66943e-17	5.80331e-16
Sdcbp2	83.5864	3.42655	0.406935	8.42037	3.75297e-17	5.92914e-16
Tnnt3	60.7341	-3.4484	0.409607	-8.4188	3.80372e-17	6.00295e-16
Uhrf2	237.576	1.52794	0.1816	8.4138	3.96941e-17	6.25781e-16
Tram1	1236.14	-0.990191	0.117711	-8.41204	4.02942e-17	6.3457e-16
Icosl	342.731	2.06617	0.245862	8.40378	4.32345e-17	6.80156e-16
Arid5a	2903.11	0.801848	0.0954742	8.39858	4.51912e-17	7.10189e-16
Saa1	2580.53	1.11773	0.133117	8.39656	4.59743e-17	7.21733e-16
Rab3b	36.2481	5.4387	0.648027	8.39271	4.75074e-17	7.45016e-16
H2-Aa	1556.37	5.71388	0.680848	8.39231	4.76675e-17	7.46741e-16
Clec4a3	44.7512	6.61611	0.788515	8.39059	4.83698e-17	7.56947e-16
Tm9sf4	2808.53	1.06032	0.126508	8.38145	5.22799e-17	8.17278e-16
Map3k5	743.902	1.52675	0.182221	8.3786	5.35622e-17	8.36447e-16
Glul	1728.83	0.889538	0.106216	8.37479	5.53212e-17	8.63011e-16
Itga5	252.392	-1.74258	0.2082	-8.36974	5.77458e-17	8.99892e-16
Tmem17	837.14	0.895791	0.107063	8.36696	5.91226e-17	9.20385e-16
Pbxip1	141.133	3.76829	0.450624	8.36239	6.14614e-17	9.55795e-16
Lmo2	126.733	5.66012	0.677004	8.36055	6.24278e-17	9.69812e-16
Parp11	3686.29	-1.23626	0.147901	-8.35874	6.33932e-17	9.83783e-16
Adcy9	150.272	3.49354	0.418165	8.35444	6.57431e-17	1.01919e-15
Zfp947	433.194	1.10253	0.131976	8.35403	6.59748e-17	1.02172e-15
Frat2	936.511	-2.74214	0.328299	-8.35256	6.67981e-17	1.03339e-15
Setdb2	2213.85	-0.882963	0.105718	-8.35206	6.70811e-17	1.0367e-15
Pabpc1l	5693.42	-1.37662	0.164904	-8.348	6.94306e-17	1.07189e-15
Oxt	419.786	1.53306	0.183757	8.34284	7.25259e-17	1.11852e-15
Cdkn2b	62.2886	6.38754	0.765658	8.34255	7.27043e-17	1.12011e-15
Pdzd11	360.716	-1.52701	0.18307	-8.34111	7.35963e-17	1.13268e-15
H2afx	1875.83	-2.16217	0.259299	-8.33852	7.52265e-17	1.15658e-15
Snrnp70	1293.77	-1.33161	0.159784	-8.33382	7.82762e-17	1.20223e-15
Ntn4	68.4428	-4.03603	0.484751	-8.32597	8.36382e-17	1.28326e-15
Dctpp1	444.928	-2.23443	0.268409	-8.32471	8.45378e-17	1.29572e-15
Ubtfl1	167.946	-1.72516	0.207237	-8.32456	8.46406e-17	1.29597e-15
1500012F01Rik	893.671	-1.45937	0.175423	-8.31916	8.85893e-17	1.35503e-15
Ogn	262.016	1.85989	0.223747	8.31247	9.37295e-17	1.43219e-15
Pold1	1616.09	-1.06785	0.128475	-8.31175	9.42994e-17	1.43942e-15
Osr1	351.505	2.80265	0.337229	8.31082	9.50444e-17	1.44931e-15
Hmgcs1	1023.6	-0.812724	0.0978468	-8.30608	9.89151e-17	1.50679e-15
Nos1	3331.13	-1.20249	0.144789	-8.30513	9.97073e-17	1.5173e-15
Ift80	1708.2	-2.352	0.283248	-8.30369	1.0093e-16	1.53435e-15
Nipal1	48.3239	5.47927	0.659958	8.30246	1.01974e-16	1.54864e-15
Hpgd	45.2146	5.86463	0.706457	8.30146	1.02837e-16	1.56015e-15
Ehd3	2545.74	0.856838	0.103261	8.29781	1.06051e-16	1.60727e-15
Vsig4	68.6226	3.92086	0.472604	8.29628	1.07425e-16	1.62644e-15
Arl3	249.975	-1.48879	0.17948	-8.29501	1.08577e-16	1.64221e-15
Hirip3	1020.23	-1.70297	0.205441	-8.28932	1.13893e-16	1.72087e-15
Sepsecs	279.854	3.85445	0.465285	8.28406	1.19048e-16	1.79694e-15
Snrpa1	6483.45	-0.550211	0.0664201	-8.28381	1.19299e-16	1.7989e-15
Ilf3	2825.09	-1.0319	0.124593	-8.2822	1.20925e-16	1.82158e-15
Ankrd55	79.3025	-5.05317	0.610485	-8.2773	1.25994e-16	1.89411e-15
Gm525	51.5651	-6.49763	0.784993	-8.27731	1.25984e-16	1.89411e-15
Thop1	415.165	-1.20626	0.145752	-8.27612	1.27257e-16	1.91116e-15
Dnajb9	954.736	-1.44252	0.174458	-8.26858	1.35562e-16	2.03385e-15
Pim2	43.2174	6.55204	0.792458	8.268	1.36224e-16	2.04171e-15
H3f3a	3334.85	-0.845303	0.102301	-8.26288	1.42193e-16	2.12904e-15
Arap1	2472.77	0.888857	0.107709	8.25239	1.55257e-16	2.32231e-15
Tomt	964.166	-1.0477	0.126974	-8.25133	1.56643e-16	2.34069e-15
Znf41-ps	508.428	-1.3439	0.162875	-8.25114	1.56891e-16	2.34204e-15
Mnat1	765.882	-1.25064	0.151683	-8.24512	1.64991e-16	2.46049e-15
Nde1	415.906	-1.73949	0.211002	-8.24394	1.66634e-16	2.48252e-15
Sfmbt2	1756.87	1.60708	0.194961	8.24308	1.67838e-16	2.49795e-15
5430416N02Rik	168.389	-1.82032	0.220887	-8.24097	1.70827e-16	2.5399e-15
Snta1	981.74	-1.04123	0.126359	-8.24024	1.71871e-16	2.55287e-15
Nr4a2	39.8416	6.50849	0.790244	8.23605	1.77988e-16	2.64109e-15
Irak1	3379.06	0.649146	0.0788622	8.23139	1.85055e-16	2.74323e-15
Tmem129	3033.6	1.1525	0.140019	8.231	1.85657e-16	2.74943e-15
Dcun1d3	465.791	1.69097	0.205746	8.21874	2.05646e-16	3.03939e-15
Ptbp3	7802.64	-1.08382	0.131871	-8.21879	2.05572e-16	3.03939e-15
Zfp282	1367.1	-0.999227	0.121593	-8.2178	2.07269e-16	3.06034e-15
Snrpg	1435.72	-1.26089	0.153455	-8.21668	2.09223e-16	3.08614e-15
Mospd4	389.509	1.102	0.134474	8.19495	2.50689e-16	3.69413e-15
Zfp653	1364.79	1.13045	0.137977	8.19302	2.54761e-16	3.75043e-15
Sostdc1	1363.93	1.7168	0.209766	8.18435	2.73785e-16	4.02651e-15
Spdyb	347.742	-1.3515	0.165163	-8.18278	2.77361e-16	4.07508e-15
Gmeb1	839.491	-1.0266	0.125483	-8.18119	2.81061e-16	4.12537e-15
Selenbp2	167.041	4.89119	0.598151	8.17718	2.90558e-16	4.26057e-15
Fert2	123.428	4.75216	0.581237	8.17594	2.93557e-16	4.30031e-15
Abcf2	1975.88	-0.872306	0.106723	-8.17357	2.99407e-16	4.38169e-15
Mageh1	40.6867	5.26971	0.644739	8.17341	2.99799e-16	4.38312e-15
Dnaja4	591.44	2.57722	0.315333	8.17301	3.00781e-16	4.39317e-15
Tmem181a	673.525	1.01676	0.124427	8.17152	3.04535e-16	4.44364e-15
Rab20	387.304	1.5343	0.187766	8.17133	3.05005e-16	4.44615e-15
Cd300lb	44.3233	6.52339	0.798566	8.16888	3.11263e-16	4.53294e-15
Oit1	9303.62	1.02948	0.126067	8.16609	3.18535e-16	4.63431e-15
Ei24	1409.77	1.09213	0.13375	8.1655	3.20114e-16	4.65274e-15
Ext1	304.191	-1.96035	0.240116	-8.16418	3.23634e-16	4.69932e-15
Soat1	118.027	2.31058	0.283104	8.16159	3.30643e-16	4.79642e-15
Cdipt	2645.65	1.31407	0.161077	8.15804	3.40511e-16	4.93476e-15
Cyp3a13	36.2157	6.43717	0.789079	8.15783	3.41106e-16	4.93858e-15
Rnf219	404.06	2.30323	0.282348	8.15742	3.42267e-16	4.95058e-15
Stxbp1	575.854	1.10293	0.13522	8.15656	3.44711e-16	4.98109e-15
Hnrnpll	1353.36	-0.973619	0.119434	-8.15196	3.58066e-16	5.16905e-15
Inpp5d	3658.88	1.02618	0.125912	8.14992	3.64151e-16	5.25181e-15
H2-Eb1	1204.41	5.69964	0.699394	8.1494	3.65734e-16	5.26954e-15
Gsn	1250.55	-2.83475	0.347868	-8.14891	3.67206e-16	5.28564e-15
Ank1	618.408	6.199	0.760751	8.14853	3.68362e-16	5.29716e-15
Exosc6	465.424	-1.27482	0.156559	-8.14272	3.86482e-16	5.55237e-15
Prkci	82.5863	6.73609	0.827677	8.13855	4.00035e-16	5.74154e-15
Ivns1abp	7728.61	-0.903071	0.110994	-8.13625	4.07718e-16	5.84618e-15
Psg-ps1	405.25	1.75932	0.2163	8.13368	4.16438e-16	5.96548e-15
Lrrc47	1302.53	-1.21244	0.149207	-8.12584	4.44261e-16	6.35792e-15
Exoc8	568.406	1.8717	0.230351	8.12543	4.45796e-16	6.37376e-15
Sft2d3	420.835	1.29687	0.159698	8.12078	4.63202e-16	6.61628e-15
Klhl17	798.268	-1.11838	0.137834	-8.11401	4.89772e-16	6.98357e-15
Lrfn4	113.261	-3.61431	0.445442	-8.11399	4.89853e-16	6.98357e-15
Ccdc138	102.464	-2.1702	0.267477	-8.11361	4.91378e-16	6.99861e-15
Glud1	4047.18	0.8924	0.110015	8.11164	4.99417e-16	7.10631e-15
Dip2a	235.104	2.3432	0.28904	8.10683	5.19581e-16	7.38618e-15
Klhl7	371.149	1.38967	0.17146	8.10493	5.27747e-16	7.49512e-15
Rbbp8nl	4342.23	-1.05067	0.129701	-8.10069	5.46462e-16	7.75352e-15
Ranbp17	2390.49	-1.31309	0.162202	-8.09541	5.70716e-16	8.08994e-15
Pank1	1874.74	-0.707297	0.087406	-8.09208	5.86543e-16	8.30638e-15
Aldh3a2	997.644	0.849595	0.105009	8.09065	5.93453e-16	8.39626e-15
Ccdc50	1501.76	1.29932	0.160709	8.08493	6.21979e-16	8.79151e-15
Mettl7a2Higd1c	138.489	1.7894	0.221391	8.0825	6.34526e-16	8.96035e-15
Prrc2b	465.311	1.09094	0.135048	8.07819	6.57332e-16	9.27361e-15
Zfp300	135.019	2.92045	0.361547	8.07766	6.60238e-16	9.3058e-15
Gpr18	1314.3	1.9892	0.246264	8.07752	6.60999e-16	9.30771e-15
Chpf	827.544	1.27955	0.158438	8.07603	6.69076e-16	9.41256e-15
5730409E04Rik	40.3602	5.72935	0.70967	8.07326	6.84438e-16	9.61958e-15
Trim2	170.765	5.02953	0.623121	8.07152	6.94281e-16	9.74873e-15
Ctso	794.11	1.02798	0.127442	8.0663	7.24625e-16	1.01652e-14
Txlna	665.426	-1.30128	0.16138	-8.06347	7.41607e-16	1.03937e-14
Plekha4	3221.68	0.601618	0.0746235	8.06205	7.50227e-16	1.05046e-14
Ly86	82.6674	4.77812	0.592787	8.06044	7.60195e-16	1.06342e-14
Peli3	4616.92	0.708632	0.0879178	8.06017	7.619e-16	1.0648e-14
Map3k8	461.258	1.90698	0.236815	8.05259	8.10595e-16	1.13179e-14
Alas2	2958.93	6.33439	0.787084	8.04792	8.42127e-16	1.17279e-14
Gbp6	555.578	-1.63013	0.202553	-8.04789	8.42317e-16	1.17279e-14
Sfrp1	10101.7	-1.43614	0.178446	-8.04803	8.4138e-16	1.17279e-14
Nlk	172.693	-3.90031	0.484952	-8.04268	8.78976e-16	1.22269e-14
Lyl1	55.9308	5.19762	0.646321	8.04186	8.84849e-16	1.22971e-14
Arhgap27os3	848.528	1.24018	0.154366	8.034	9.43448e-16	1.30992e-14
AI504432	2987.33	-1.06478	0.132541	-8.03355	9.46886e-16	1.31347e-14
Mdga2	358.542	2.23363	0.278091	8.03202	9.5883e-16	1.3288e-14
Zfp825	49.1513	-4.44596	0.553688	-8.02973	9.76895e-16	1.35258e-14
Reep3	64.4225	-3.75131	0.467277	-8.02802	9.90599e-16	1.37028e-14
2017-03-09	131.682	4.59785	0.572746	8.02772	9.93004e-16	1.37233e-14
Ccdc92	363.629	1.48634	0.185154	8.0276	9.93945e-16	1.37236e-14
Glcci1	1518.48	-1.87259	0.233296	-8.02669	1.00141e-15	1.38139e-14
Ostn	3896.48	1.16808	0.145551	8.02522	1.01344e-15	1.39669e-14
Man2b2	1092.7	1.12163	0.139767	8.02502	1.01512e-15	1.39772e-14
Zzz3	9638.07	2.04599	0.254965	8.02461	1.01847e-15	1.40104e-14
Arhgef18	6870.99	1.42308	0.177385	8.02253	1.0359e-15	1.4237e-14
Ppcs	58.1694	6.21893	0.775202	8.02234	1.03749e-15	1.42456e-14
Cbx3	1171.62	-1.0486	0.130778	-8.01817	1.07335e-15	1.47245e-14
Syne4	1504.22	1.99703	0.249083	8.01755	1.07878e-15	1.47853e-14
Arl13b	693.62	2.17942	0.271888	8.01587	1.09359e-15	1.49745e-14
Srms	57.8328	-3.81708	0.476249	-8.01488	1.10243e-15	1.50817e-14
Smco1	4386.72	-1.06534	0.132924	-8.01462	1.10476e-15	1.50998e-14
Mapre2	1470.45	2.26678	0.282837	8.01446	1.10618e-15	1.51053e-14
Ilvbl	1225.7	-1.1833	0.14765	-8.01419	1.10866e-15	1.51253e-14
Gcnt2	626.845	6.20077	0.774279	8.00844	1.16169e-15	1.58343e-14
Lnpep	4691.55	1.10336	0.137808	8.00648	1.18036e-15	1.6074e-14
Wdhd1	65.7517	5.31439	0.663941	8.00431	1.20137e-15	1.63453e-14
Bbip1	530.57	-1.06172	0.132719	-7.99972	1.24706e-15	1.69514e-14
Maf	136.625	3.68727	0.461059	7.99739	1.27082e-15	1.72585e-14
Pdp1	1379.9	1.07632	0.134677	7.99183	1.32953e-15	1.80395e-14
Cnot6l	6031.67	1.14783	0.143676	7.98903	1.36005e-15	1.84368e-14
Cd37	3164.68	0.963396	0.120623	7.98684	1.38442e-15	1.87501e-14
Nabp2	878.381	-2.59854	0.325574	-7.98142	1.44657e-15	1.9574e-14
Ak2	1494.31	-1.73245	0.217136	-7.97865	1.4794e-15	2.00001e-14
5031439G07Rik	497.649	1.23455	0.154756	7.97739	1.49465e-15	2.0188e-14
Zim3	169.952	-1.70925	0.214307	-7.97571	1.51504e-15	2.04447e-14
2900079G21Rik	50.1926	-6.36662	0.798449	-7.97374	1.53938e-15	2.07544e-14
Elac1	369.815	1.14387	0.143528	7.96965	1.59123e-15	2.14341e-14
Camta2	1392.17	0.776011	0.0974003	7.96723	1.62268e-15	2.1838e-14
Hk3	120.304	4.10907	0.515844	7.96572	1.6426e-15	2.20861e-14
Acss1	1934.22	0.767938	0.096449	7.96211	1.69135e-15	2.27212e-14
Alg8	428.005	-1.18272	0.148612	-7.95844	1.74226e-15	2.33839e-14
Slc33a1	363.94	2.42868	0.305245	7.95648	1.77005e-15	2.37356e-14
Traf6	1298.79	-2.13433	0.268272	-7.95584	1.77921e-15	2.38369e-14
Rab33a	104.01	2.2422	0.282018	7.95055	1.85692e-15	2.48556e-14
Cfdp1	1155.79	-0.9157	0.115184	-7.94987	1.86704e-15	2.49463e-14
Tmem106c	92.4634	2.62374	0.330031	7.94998	1.86541e-15	2.49463e-14
Dnph1	118.724	-2.74114	0.344838	-7.94907	1.87912e-15	2.50853e-14
Rnf133	993.218	1.08892	0.137021	7.94707	1.90969e-15	2.54705e-14
Zfyve20	431.789	1.23045	0.154848	7.94619	1.92338e-15	2.56302e-14
Usp9x	6547.95	-0.57989	0.0730125	-7.94233	1.98411e-15	2.64158e-14
Kdm3b	3764.69	0.650229	0.0818937	7.93991	2.02327e-15	2.69131e-14
Gpr137b-ps	168.49	2.23832	0.282034	7.93636	2.08208e-15	2.76706e-14
Plekha5	727.918	1.0327	0.130136	7.93556	2.09552e-15	2.78245e-14
Lcn2	135.406	6.24257	0.786812	7.93401	2.12183e-15	2.81488e-14
Tox2	1764.02	1.92431	0.242873	7.92311	2.31635e-15	3.0702e-14
Smr2	105.484	5.14336	0.649261	7.92186	2.33979e-15	3.09851e-14
Rab22a	50.5009	3.30875	0.417771	7.92	2.37511e-15	3.14248e-14
Pard3b	66.8804	6.25793	0.790154	7.91988	2.3773e-15	3.1426e-14
Hs3st3b1	2554.99	3.50906	0.443167	7.91814	2.41088e-15	3.18416e-14
Mrps14	323.509	-1.32699	0.167614	-7.91697	2.43371e-15	3.21146e-14
Nup107	734.373	1.11856	0.141322	7.91498	2.47287e-15	3.26024e-14
Crocc	362.247	-1.37555	0.173823	-7.91354	2.50179e-15	3.29546e-14
2610307P16Rik	43.5427	-5.83696	0.737726	-7.9121	2.53091e-15	3.33087e-14
Vip	21011.8	1.55764	0.196877	7.91174	2.53808e-15	3.33736e-14
Acsl4	1484.83	0.949796	0.120102	7.90823	2.61064e-15	3.42975e-14
Gpr35	47.3193	5.55683	0.702713	7.90767	2.62241e-15	3.44217e-14
Klrb1f	107.896	2.90751	0.367711	7.90706	2.63533e-15	3.45609e-14
E2f3	649.941	-1.31313	0.166078	-7.90671	2.64277e-15	3.46279e-14
Dcbld2	66.3221	3.48099	0.440308	7.9058	2.66211e-15	3.48507e-14
C530008M17Rik	224.972	2.9108	0.368706	7.89465	2.9112e-15	3.80782e-14
Slc7a7	1446.4	-1.05282	0.133373	-7.89378	2.93171e-15	3.83128e-14
Spata9	833.504	-1.31403	0.166472	-7.89342	2.94021e-15	3.83902e-14
Chd7	5398.59	2.30276	0.291757	7.89275	2.95611e-15	3.8564e-14
Atp10a	1681.24	0.868282	0.110053	7.8897	3.02922e-15	3.94833e-14
Jun	823.243	-2.50447	0.317635	-7.88473	3.15215e-15	4.10496e-14
Fam210b	235.023	2.21202	0.280591	7.88345	3.18452e-15	4.14349e-14
Skida1	239.533	1.42351	0.180593	7.88239	3.21181e-15	4.17535e-14
Cd300lf	50.9312	5.41246	0.687102	7.87723	3.34707e-15	4.3474e-14
Bcl2l11	2968.11	1.3477	0.171113	7.8761	3.3776e-15	4.38324e-14
Marco	746.638	-3.81811	0.484827	-7.87519	3.40212e-15	4.41121e-14
Ccdc69	430.353	-1.43331	0.182017	-7.87457	3.41926e-15	4.42958e-14
2010107E04Rik	1062.61	-0.903024	0.11471	-7.87222	3.48416e-15	4.50973e-14
Dhx15	6791	-0.609554	0.0774445	-7.87084	3.52256e-15	4.55345e-14
Hook3	1816.2	1.09688	0.13936	7.87079	3.52405e-15	4.55345e-14
Ppic	10418.7	-1.12442	0.142888	-7.86929	3.56664e-15	4.60449e-14
AF251705	34.6355	5.89541	0.749321	7.86768	3.61285e-15	4.6601e-14
Slc35b2	478.318	1.65795	0.21079	7.86542	3.67858e-15	4.74079e-14
Eml6	68.5878	3.82866	0.486849	7.86416	3.7157e-15	4.78448e-14
Mfap4	1112.41	0.858088	0.109117	7.86396	3.72178e-15	4.78818e-14
Elovl5	5149.9	1.1907	0.151455	7.86169	3.78994e-15	4.87166e-14
Amigo1	184.656	2.10114	0.267324	7.85989	3.84462e-15	4.93768e-14
Vwc2	1019.06	1.69257	0.215355	7.85945	3.85823e-15	4.9509e-14
Rpl38	3594.66	-0.904094	0.115138	-7.85223	4.08711e-15	5.24008e-14
Xpo5	5807.83	-0.660539	0.0841524	-7.84932	4.18295e-15	5.35835e-14
Pdhb	2162.99	-0.605099	0.0770947	-7.84878	4.2012e-15	5.3771e-14
Slc4a9	837.831	1.34148	0.170929	7.84817	4.22142e-15	5.39834e-14
Sigmar1	112.908	5.87895	0.749691	7.84183	4.44033e-15	5.67342e-14
Tbp	1182.93	0.889895	0.113537	7.83791	4.58101e-15	5.84815e-14
Fam216a	324.675	-1.14143	0.145674	-7.8355	4.66965e-15	5.9562e-14
Txlng	2570.45	-1.40839	0.179754	-7.83512	4.68406e-15	5.96947e-14
Clnk	350.191	6.78961	0.866813	7.83284	4.76961e-15	6.0733e-14
Ppp1r12c	4520.63	1.44474	0.184514	7.82999	4.87896e-15	6.20723e-14
2410006H16Rik	831.202	-1.40663	0.179714	-7.82702	4.99588e-15	6.35057e-14
Nmrk2	246.177	-2.11683	0.2707	-7.81986	5.28805e-15	6.71623e-14
Fbxo44	69.6044	-2.56926	0.328565	-7.81964	5.29754e-15	6.71973e-14
Tada3	265.364	-1.69646	0.21695	-7.81958	5.29983e-15	6.71973e-14
Afap1	239.532	-4.19707	0.536766	-7.81918	5.31674e-15	6.73544e-14
Rnaseh1	71.342	4.93579	0.631658	7.81402	5.5394e-15	7.01155e-14
Kif5c	106.152	3.45887	0.442822	7.81098	5.67464e-15	7.17664e-14
Ttc3	987.178	1.86346	0.23859	7.81028	5.70592e-15	7.21008e-14
Tmprss11bnl	1118.57	1.49707	0.191737	7.80793	5.81357e-15	7.33988e-14
Spryd7	802.197	1.15809	0.148325	7.80777	5.82103e-15	7.34307e-14
Athl1	432.713	-1.18141	0.151356	-7.80553	5.92527e-15	7.46825e-14
Dip2c	109.137	-2.68561	0.344279	-7.80067	6.15816e-15	7.75522e-14
Ncf2	582.436	1.32586	0.170012	7.79863	6.25851e-15	7.87494e-14
Cacnb4	48.2216	3.79608	0.486848	7.79726	6.32638e-15	7.95362e-14
Cd177	61.0872	5.92688	0.760792	7.79041	6.67916e-15	8.39006e-14
Nt5dc2	1723.11	-0.777959	0.0999273	-7.78525	6.95782e-15	8.73273e-14
Ptges	167.195	5.62572	0.722663	7.78472	6.98704e-15	8.76204e-14
2810459M11Rik	64.6846	5.15998	0.662909	7.78385	7.035e-15	8.81475e-14
Rasip1	111.81	5.96005	0.765749	7.7833	7.06557e-15	8.84562e-14
Fgd6	188.075	1.83169	0.235364	7.78238	7.11732e-15	8.90292e-14
Trim29	1933.18	-0.692017	0.0889301	-7.78158	7.16258e-15	8.95202e-14
Ly75	1253.78	0.941142	0.120998	7.77817	7.35826e-15	9.18888e-14
Ccdc22	441.055	-1.25665	0.161579	-7.77734	7.40635e-15	9.24119e-14
Fes	117.814	3.19684	0.411088	7.77654	7.45347e-15	9.2922e-14
Papln	848.261	-1.13575	0.146059	-7.77601	7.48459e-15	9.32319e-14
Elfn2	39.5307	-5.73699	0.738011	-7.77359	7.62921e-15	9.49541e-14
Iqsec1	2923.92	1.93656	0.249216	7.7706	7.81141e-15	9.71405e-14
Atp5b	18707.4	-0.838507	0.107933	-7.76879	7.92416e-15	9.84604e-14
Exosc2	1025.46	-1.00733	0.129689	-7.76723	8.02229e-15	9.95968e-14
Lrrc25	35.7757	5.86894	0.756818	7.75476	8.85109e-15	1.09795e-13
Rubie	823.745	-1.12323	0.144882	-7.75267	8.99785e-15	1.11522e-13
Dnajc8	2167.1	-0.974879	0.125887	-7.74409	9.62673e-15	1.19218e-13
Cab39l	782.954	0.782607	0.101128	7.73881	1.00351e-14	1.24172e-13
Dhcr7	731.258	-0.809132	0.104594	-7.73595	1.02631e-14	1.26888e-13
Sarnp	43.502	-5.18426	0.671151	-7.72443	1.12357e-14	1.38797e-13
2700089E24Rik	902.744	1.49505	0.193677	7.71931	1.16962e-14	1.44366e-13
Krt80	41.4848	6.30602	0.817737	7.71154	1.24305e-14	1.53303e-13
Riok1	5285.99	0.985	0.127771	7.70912	1.26688e-14	1.56112e-13
Clstn1	464.949	1.0707	0.1389	7.70837	1.27431e-14	1.56898e-13
Tmbim6	128.455	3.40446	0.441752	7.70673	1.29079e-14	1.58796e-13
Psd	1456.91	-1.47348	0.19126	-7.70409	1.31782e-14	1.61988e-13
Cep83	993.481	-1.32357	0.171885	-7.70035	1.35696e-14	1.66558e-13
Vegfc	101.604	-2.88528	0.374696	-7.70032	1.35724e-14	1.66558e-13
Hnrnpm	8332.9	-0.703629	0.0913833	-7.69975	1.36332e-14	1.67167e-13
Lamp1	3472.74	0.842498	0.109437	7.69845	1.37731e-14	1.68743e-13
Ifit1	600.002	-2.25476	0.292932	-7.69722	1.39054e-14	1.70224e-13
Bdh1	862.303	-1.24553	0.161832	-7.69643	1.39915e-14	1.71138e-13
Clu	31.2649	5.76543	0.749695	7.69038	1.46703e-14	1.79293e-13
Limk2	1899.73	-0.620295	0.0806853	-7.68783	1.49651e-14	1.82746e-13
Rfc3	2587.34	-1.02323	0.133167	-7.6838	1.54439e-14	1.88438e-13
Ctage5	3697.05	-0.917969	0.119481	-7.68294	1.55473e-14	1.89545e-13
Enpp5	162.88	1.45345	0.189194	7.68235	1.56199e-14	1.90274e-13
Tnfsf18	333.589	3.23681	0.421338	7.6822	1.56376e-14	1.90334e-13
Ropn1	286.714	1.56333	0.203505	7.68199	1.56633e-14	1.90491e-13
2700094K13Rik	804.924	-1.43295	0.186553	-7.6812	1.57608e-14	1.9152e-13
Srrm3	4082.04	-1.03781	0.135129	-7.68015	1.58902e-14	1.92935e-13
Gbp10	56.3584	-3.35637	0.43716	-7.67767	1.62013e-14	1.96553e-13
H2-Eb2	73.0711	6.00932	0.782935	7.67538	1.64929e-14	1.99928e-13
Kcna2	633.564	-3.28745	0.428356	-7.67458	1.65956e-14	2.0101e-13
Midn	518.87	1.76512	0.230006	7.67424	1.66404e-14	2.01387e-13
Cxcr2	70.9534	5.95787	0.776948	7.66831	1.7428e-14	2.10748e-13
Agpat2	305.44	1.68996	0.220387	7.66816	1.74479e-14	2.10818e-13
Sf3b3	16149.6	-0.434446	0.0566598	-7.66764	1.75196e-14	2.11513e-13
Ddah2	111.307	-2.13565	0.278975	-7.65534	1.92796e-14	2.32572e-13
1600012H06Rik	637.297	1.06449	0.139116	7.65176	1.9825e-14	2.38958e-13
Agbl5	554.428	-1.04318	0.136352	-7.65067	1.9994e-14	2.40801e-13
E2f2	2702.48	-2.49147	0.32574	-7.64867	2.03073e-14	2.44376e-13
Tcte2	288.071	1.43569	0.187725	7.64782	2.04419e-14	2.45798e-13
Padi1	999.101	1.3206	0.172709	7.64642	2.0665e-14	2.4828e-13
Vdac3	2304.09	-1.13818	0.148927	-7.64252	2.1301e-14	2.55715e-13
Fbl	1318.3	-0.994424	0.130209	-7.63713	2.2212e-14	2.66437e-13
I730030J21Rik	203.206	-1.84825	0.242016	-7.63687	2.22562e-14	2.66752e-13
4930453N24Rik	1081.89	1.48662	0.1949	7.62762	2.39121e-14	2.86369e-13
Lman2l	601.412	-1.50041	0.196746	-7.62614	2.41881e-14	2.89441e-13
Rce1	5984.44	-1.94132	0.254758	-7.62025	2.53181e-14	3.0272e-13
Cd79a	206.345	4.08067	0.536	7.6132	2.67402e-14	3.19467e-13
Ikzf4	156.304	-2.50071	0.32856	-7.61113	2.71716e-14	3.24361e-13
Atg13	1139.31	0.806513	0.105988	7.60945	2.75258e-14	3.28326e-13
Smpd3	726.324	0.875367	0.115213	7.59784	3.01125e-14	3.58892e-13
U2af2	1310.39	-1.30338	0.171615	-7.59478	3.08326e-14	3.67182e-13
Wdpcp	658.066	4.49699	0.592387	7.59131	3.16683e-14	3.76832e-13
Trim23	136.956	2.08518	0.274807	7.58779	3.25401e-14	3.86898e-13
Baiap3	4414.37	2.98299	0.393242	7.58564	3.3085e-14	3.93063e-13
Wwtr1	3506.13	3.12635	0.412189	7.58476	3.33099e-14	3.95419e-13
Cyp27a1	40.7236	5.60581	0.739407	7.5815	3.41591e-14	4.05177e-13
Leo1	488.902	-0.993567	0.131086	-7.5795	3.46892e-14	4.11137e-13
Itga2b	129.158	2.28623	0.301809	7.57507	3.58927e-14	4.25064e-13
Bspry	108.663	4.54376	0.599905	7.57413	3.61545e-14	4.27823e-13
Ciita	274.307	4.78535	0.632023	7.57149	3.6898e-14	4.36275e-13
Ikbkb	5868.74	1.10664	0.146275	7.56545	3.8651e-14	4.5664e-13
Shpk	1709.54	0.992777	0.131234	7.56492	3.881e-14	4.58155e-13
Nfix	845.691	2.55481	0.338078	7.55686	4.12926e-14	4.87077e-13
Pigo	2478.19	1.22613	0.162276	7.55584	4.16179e-14	4.90524e-13
Sema5a	671.221	1.59523	0.21116	7.55459	4.20183e-14	4.94852e-13
Kdelc2	39.964	4.18375	0.554062	7.55105	4.31753e-14	5.08078e-13
Bank1	172.945	4.10021	0.543241	7.54768	4.43068e-14	5.2098e-13
Cast	3578.41	0.679605	0.090061	7.54605	4.4865e-14	5.27128e-13
Cst7	1204.08	1.95823	0.259726	7.53958	4.71497e-14	5.53536e-13
Tubb2a-ps2	52.7384	6.30565	0.836846	7.53501	4.883e-14	5.7281e-13
Zbtb7c	2401.29	1.20969	0.160548	7.53477	4.89196e-14	5.7341e-13
Bub1	1146.55	-2.16601	0.287706	-7.52857	5.12998e-14	6.00836e-13
Stx5a	146.751	2.02523	0.269079	7.52652	5.21092e-14	6.09837e-13
Sepn1	1388.66	-0.924988	0.122907	-7.52591	5.23559e-14	6.12243e-13
Snrnp35	309.879	-1.2802	0.170139	-7.52443	5.29512e-14	6.1872e-13
Lrrc23	286.534	3.05304	0.4058	7.52352	5.33202e-14	6.22542e-13
Map4k2	10319	-1.84576	0.245423	-7.52072	5.44762e-14	6.35045e-13
Srpx	1707.66	0.652275	0.0867297	7.52078	5.44516e-14	6.35045e-13
Uba1y	187.937	1.47839	0.196725	7.51504	5.68941e-14	6.62711e-13
Actb	46954.3	1.12508	0.149742	7.51348	5.75754e-14	6.696e-13
Gabrr2	86.2871	-2.75146	0.366198	-7.51358	5.75309e-14	6.696e-13
Ninj2	5105.21	0.881548	0.117361	7.51143	5.8486e-14	6.7966e-13
Tnfrsf8	1279.39	1.90213	0.25338	7.50702	6.04893e-14	7.02392e-13
Rap2c	1039.86	2.9655	0.39509	7.50589	6.10144e-14	7.07938e-13
Gatsl3	155.837	2.57115	0.342759	7.50132	6.31773e-14	7.32463e-13
Cox7b	1428.54	-0.81564	0.108734	-7.50121	6.32305e-14	7.3251e-13
Aldh1a2	73.0075	6.37942	0.851217	7.49447	6.65662e-14	7.70555e-13
Zfp810	563.819	1.12481	0.150122	7.49268	6.74794e-14	7.80519e-13
Evi2a	303.026	1.52448	0.203473	7.49229	6.76837e-14	7.82274e-13
Gp49a	78.2739	4.79474	0.640479	7.48618	7.09071e-14	8.18894e-13
Tbca	115.636	5.21324	0.697033	7.47919	7.47845e-14	8.63005e-13
Bora	516.084	-1.51077	0.202017	-7.47845	7.52054e-14	8.6719e-13
Shisa2	1326.05	-1.0228	0.136784	-7.47751	7.57454e-14	8.72741e-13
Bbx	1187.02	0.867879	0.116081	7.47651	7.63197e-14	8.7868e-13
Engase	369.024	-1.25499	0.167883	-7.47541	7.69614e-14	8.85383e-13
Kif19a	52.7046	5.97259	0.799152	7.47366	7.7993e-14	8.96559e-13
Notch4	2078.84	1.05186	0.140766	7.47236	7.87717e-14	9.04812e-13
Eif4a1	6586.84	-0.930609	0.124593	-7.4692	8.06813e-14	9.26033e-13
Tmem52	35.4802	4.06633	0.544661	7.4658	8.27935e-14	9.49544e-13
Gba	1010.5	0.83799	0.112256	7.46498	8.33124e-14	9.54761e-13
Dgcr8	1353.81	-0.795711	0.10664	-7.46163	8.54602e-14	9.78621e-13
Slu7	155.067	4.60545	0.617228	7.46151	8.55394e-14	9.78775e-13
Sema3a	14109.6	1.35409	0.181499	7.4606	8.61275e-14	9.84194e-13
Uba5	3654.59	-0.903129	0.121053	-7.46058	8.6145e-14	9.84194e-13
Dock9	1001.91	1.15637	0.155012	7.4599	8.65913e-14	9.88534e-13
Smarcc2	1044.72	-0.725385	0.0972659	-7.45775	8.80132e-14	1.004e-12
Zfp868	822.754	0.893318	0.119832	7.45473	9.00501e-14	1.02645e-12
Pnpt1	672.361	0.865421	0.116131	7.4521	9.18684e-14	1.04637e-12
Rarres2	757.289	-2.13111	0.286166	-7.44711	9.5406e-14	1.08584e-12
Serp2	669.918	-1.70722	0.229268	-7.4464	9.59191e-14	1.09084e-12
Tubgcp2	724.831	-1.34332	0.180475	-7.44323	9.82548e-14	1.11655e-12
Eci1	301.507	1.72471	0.231747	7.44221	9.90181e-14	1.12437e-12
Dck	2281.46	-0.777253	0.104511	-7.43703	1.02971e-13	1.16836e-12
G0s2	271.648	3.87949	0.521945	7.43277	1.06348e-13	1.20576e-12
Calhm2	153.69	2.15889	0.290602	7.42901	1.09416e-13	1.23961e-12
Zfp366	827.846	-1.19774	0.161287	-7.42616	1.11793e-13	1.26557e-12
Enkur	28.8788	5.32602	0.717314	7.42494	1.12829e-13	1.27633e-12
Scrt2	207.95	1.8805	0.253306	7.42382	1.13789e-13	1.28621e-12
Clspn	1452.39	-2.39555	0.322751	-7.42228	1.1512e-13	1.29952e-12
Slc35f2	79.5403	3.09849	0.417459	7.42226	1.1514e-13	1.29952e-12
Coa5	3048.95	0.569747	0.0767899	7.41956	1.17508e-13	1.32523e-12
LOC101055769	62.9675	3.49758	0.471549	7.41721	1.19615e-13	1.34797e-12
5830418P13Rik	40.2106	-4.61929	0.622863	-7.41622	1.20507e-13	1.357e-12
H2-D1	6459.34	1.04857	0.141401	7.41559	1.21082e-13	1.36141e-12
Stim2	659.674	-2.29597	0.309612	-7.41565	1.21026e-13	1.36141e-12
Oasl1	944.867	-4.01942	0.542299	-7.4118	1.24596e-13	1.39987e-12
Cmklr1	526.687	6.37844	0.860688	7.41086	1.25487e-13	1.40882e-12
Pkn1	7860.55	-0.863189	0.116519	-7.40811	1.28109e-13	1.43718e-12
Slc26a3	633.848	1.96972	0.265891	7.408	1.28216e-13	1.4373e-12
Tmem199	83.7567	2.23988	0.302392	7.40721	1.28989e-13	1.44487e-12
Cacng8	44.8225	6.19278	0.83611	7.40666	1.29523e-13	1.44977e-12
Hsf2	319.646	-1.05188	0.142024	-7.40633	1.29844e-13	1.45227e-12
Gpc2	88.2173	-2.73241	0.369085	-7.40321	1.32929e-13	1.48566e-12
Fam65c	80.777	4.07984	0.551171	7.40213	1.34015e-13	1.49667e-12
Csnk1g1	1505.85	0.793705	0.107314	7.39609	1.40251e-13	1.56513e-12
Fam72a	108.66	-2.1633	0.292809	-7.38809	1.48949e-13	1.66095e-12
Dusp18	221.066	5.31964	0.720225	7.38608	1.51224e-13	1.68506e-12
Ampd3	278.154	1.81936	0.246369	7.38469	1.52804e-13	1.69926e-12
Sox14	109.467	-2.61271	0.353796	-7.3848	1.52683e-13	1.69926e-12
Tmem245	368.862	-1.26664	0.171524	-7.38466	1.5284e-13	1.69926e-12
Ms4a13	291.328	6.47156	0.876541	7.38307	1.54679e-13	1.71843e-12
Slc39a6	171.838	1.90033	0.257415	7.38236	1.5551e-13	1.72637e-12
Lrwd1	1257.9	-0.681373	0.0923295	-7.37979	1.58537e-13	1.75867e-12
Fam163b	33.8096	-5.96605	0.808681	-7.3775	1.61284e-13	1.7878e-12
Ppie	80.5979	-3.77872	0.512425	-7.37418	1.65354e-13	1.83155e-12
Ly9	4099.85	0.784774	0.10647	7.37085	1.69546e-13	1.8766e-12
Impdh1	2932.67	-0.705602	0.0957353	-7.37035	1.70184e-13	1.88226e-12
Pcnt	4935.08	-1.50673	0.204462	-7.36923	1.71617e-13	1.89669e-12
Ezh2	3312.34	-2.16924	0.294601	-7.36331	1.7941e-13	1.98136e-12
Pde4dip	52.8209	-2.89185	0.392781	-7.36249	1.80505e-13	1.99197e-12
Slc35a5	990.274	1.13263	0.153853	7.36178	1.81471e-13	2.00115e-12
Tnfsf12	2248.88	2.73369	0.371424	7.36005	1.83846e-13	2.02584e-12
Syndig1l	4738.1	-0.607043	0.0824924	-7.35877	1.85614e-13	2.04381e-12
Slc35e1	257.911	1.68771	0.229478	7.35454	1.91589e-13	2.10805e-12
Lyar	1037.59	-1.21982	0.165949	-7.35056	1.97378e-13	2.17013e-12
Asb2	101.299	4.93935	0.672002	7.3502	1.97918e-13	2.17447e-12
Atp5g3	3599.43	-1.061	0.144362	-7.34959	1.98814e-13	2.18186e-12
Fkbp4	4929.51	-0.955133	0.129958	-7.34954	1.98883e-13	2.18186e-12
Cldn25	1219.08	1.76449	0.240087	7.34938	1.99122e-13	2.18287e-12
Flna	24978.2	1.0629	0.144754	7.34282	2.0914e-13	2.29101e-12
Ykt6	818.328	0.837416	0.114073	7.34105	2.11917e-13	2.31972e-12
Dnajc9	2406.18	-1.01984	0.139044	-7.33466	2.22279e-13	2.43136e-12
Id2	7246.85	2.4246	0.330789	7.32976	2.30563e-13	2.52012e-12
Sae1	1543.97	0.877359	0.119765	7.3257	2.37658e-13	2.59577e-12
Gsk3a	2150.38	-0.769693	0.105103	-7.3232	2.42126e-13	2.64263e-12
Prmt2	2361.72	-1.05913	0.144754	-7.31675	2.54056e-13	2.77081e-12
Hdac1	1661.54	-1.39812	0.191213	-7.31186	2.63467e-13	2.87135e-12
Gm14446	1206.64	2.12253	0.290398	7.30904	2.69062e-13	2.93018e-12
Ctsl	377.865	-2.92709	0.400856	-7.30211	2.83284e-13	3.08281e-12
Tnfrsf10b	1077.03	1.84446	0.252792	7.29635	2.95672e-13	3.21527e-12
Epm2aip1	1905.85	0.633638	0.086872	7.29392	3.01055e-13	3.27142e-12
Reg1	2350.79	0.912092	0.125065	7.29297	3.03198e-13	3.29231e-12
Dusp7	1088.57	1.69398	0.232353	7.29055	3.08701e-13	3.34962e-12
S100a16	599.434	1.11467	0.152921	7.28915	3.11919e-13	3.38207e-12
Klhl14	72.918	6.2684	0.860248	7.28674	3.17546e-13	3.44058e-12
Rhof	94.1075	3.61194	0.495768	7.28554	3.20376e-13	3.46872e-12
Gm4944	245.985	1.61	0.221102	7.2817	3.29632e-13	3.56634e-12
Tubb2b	399.699	-3.13699	0.430848	-7.28097	3.3142e-13	3.58309e-12
Ctcf	5074.74	-0.766223	0.105269	-7.27871	3.37034e-13	3.64114e-12
Mettl1	588.448	-1.55708	0.214051	-7.27431	3.48204e-13	3.75909e-12
Gimap9	2082.02	0.83571	0.114897	7.27355	3.50173e-13	3.77761e-12
Pde2a	878.439	0.991753	0.136374	7.27232	3.53363e-13	3.80926e-12
Ppm1k	3521.37	0.786324	0.108144	7.27106	3.56689e-13	3.84233e-12
6030458C11Rik	1132.75	1.07686	0.148109	7.2707	3.57635e-13	3.8477e-12
Hmgn5	836.215	-1.87201	0.257474	-7.27067	3.57703e-13	3.8477e-12
Hibadh	1133.03	-0.962823	0.132433	-7.27029	3.58723e-13	3.85589e-12
Trim30b	168.882	1.43519	0.197422	7.26966	3.60406e-13	3.87119e-12
Lilrb4	90.4031	4.48335	0.617073	7.26551	3.7163e-13	3.98886e-12
Hsdl1	1922.35	-0.879371	0.12104	-7.26512	3.72695e-13	3.99742e-12
Spsb2	211.049	1.23777	0.170394	7.26417	3.75349e-13	4.02299e-12
Atp1b3	9809.16	0.977947	0.134638	7.26351	3.77178e-13	4.03968e-12
Dclk2	432.473	-3.68247	0.507011	-7.26309	3.78342e-13	4.04924e-12
Bivm	309.299	1.00645	0.138596	7.26177	3.82047e-13	4.08595e-12
Csf2ra	261.438	1.44842	0.199498	7.26031	3.86198e-13	4.12739e-12
Asf1b	1129.43	-1.71772	0.236607	-7.25977	3.87739e-13	4.14089e-12
Hes1	117.008	-3.22539	0.444493	-7.25635	3.97672e-13	4.24392e-12
F5	34.1256	5.68827	0.784063	7.25486	4.02084e-13	4.28538e-12
Sycn	256.087	-2.39913	0.330693	-7.25484	4.02132e-13	4.28538e-12
Thap1	254.639	1.63963	0.226016	7.2545	4.03152e-13	4.29318e-12
Fam214b	535.619	2.8386	0.391658	7.24765	4.24078e-13	4.5128e-12
Fabp5	221.715	-3.43137	0.473463	-7.24739	4.24881e-13	4.51812e-12
Ccl9	42.3589	6.09703	0.841347	7.24675	4.26898e-13	4.53633e-12
D130040H23Rik	179.666	1.93027	0.266407	7.24556	4.30644e-13	4.57287e-12
Mars	1788.94	-0.565123	0.0780233	-7.243	4.38883e-13	4.65703e-12
Gpr141	41.0939	6.0842	0.840057	7.24261	4.40134e-13	4.66699e-12
Ap1g2	2058.93	0.933216	0.128863	7.2419	4.42428e-13	4.68798e-12
Plet1	1236.9	1.12036	0.154821	7.23649	4.60451e-13	4.87548e-12
Mcts2	898.21	0.949589	0.131277	7.23348	4.70759e-13	4.98108e-12
Tenm3	33.4086	-5.1497	0.71197	-7.23302	4.72367e-13	4.99456e-12
Far1	2519.88	0.893542	0.123546	7.23245	4.74374e-13	5.01222e-12
Ccser2	1732.44	0.760889	0.10521	7.23207	4.75677e-13	5.02242e-12
Tagap1	377.169	1.44581	0.199921	7.23192	4.76212e-13	5.02451e-12
Camk2a	164.345	-4.52695	0.626311	-7.22797	4.90277e-13	5.16924e-12
Chd3os	97.7647	-2.0949	0.289858	-7.22734	4.92531e-13	5.18934e-12
1110038B12Rik	323.933	-1.67396	0.231635	-7.22671	4.94822e-13	5.20979e-12
Mnx1	834.334	-1.95027	0.270045	-7.22202	5.12201e-13	5.38896e-12
Gnptab	2980.52	1.89701	0.262748	7.21987	5.20371e-13	5.47106e-12
F630028O10Rik	32.2925	5.99244	0.830693	7.21379	5.4416e-13	5.71713e-12
Hmg20b	593.994	-0.781464	0.108363	-7.21151	5.53341e-13	5.8095e-12
Leprotl1	3557.32	1.21939	0.169192	7.20713	5.71428e-13	5.99517e-12
Malt1	2979.59	1.07395	0.149063	7.20468	5.81812e-13	6.09981e-12
Ada	556.375	-1.67657	0.232761	-7.20297	5.89134e-13	6.17223e-12
Sprn	473.239	-0.955926	0.132741	-7.20144	5.95794e-13	6.23762e-12
Kcnip3	39.9863	4.02455	0.559133	7.19785	6.11716e-13	6.39982e-12
Flot1	890.065	1.21229	0.168451	7.19667	6.16989e-13	6.45046e-12
Igsf6	108.95	2.65531	0.369257	7.19096	6.43355e-13	6.72139e-12
Fam114a1	44.4757	2.92551	0.407069	7.18676	6.63454e-13	6.92167e-12
Maff	93.7527	-2.48163	0.345304	-7.18682	6.63194e-13	6.92167e-12
Tlr5	86.6702	4.85541	0.676313	7.17923	7.01036e-13	7.30864e-12
Kctd3	514.34	-0.813004	0.11325	-7.17887	7.02888e-13	7.32282e-12
Ctnnbip1	74.26	-2.74915	0.383128	-7.17554	7.20213e-13	7.49806e-12
Rab6b	3239.91	0.513838	0.0716427	7.17223	7.37856e-13	7.67638e-12
Erh	615.043	-1.10644	0.154333	-7.16918	7.54491e-13	7.84397e-12
Nudt1	716.942	-1.17928	0.164507	-7.16856	7.57932e-13	7.87425e-12
Lgals9	3667.68	-0.806941	0.112616	-7.16543	7.75454e-13	8.05067e-12
Tecta	1769.13	-0.882004	0.123099	-7.16501	7.77804e-13	8.06944e-12
Gtf2e2	586.101	-1.13688	0.158857	-7.15665	8.26747e-13	8.57124e-12
Add3	6116.02	0.86377	0.120761	7.15272	8.50722e-13	8.81367e-12
Ubc	582.786	1.19614	0.167307	7.14938	8.71724e-13	9.02498e-12
Ptk6	311.362	1.40967	0.197214	7.14794	8.80872e-13	9.10703e-12
Pycr2	1273.88	-0.716157	0.10019	-7.148	8.80507e-13	9.10703e-12
Cask	109.835	1.73873	0.243325	7.1457	8.95409e-13	9.2509e-12
Gabarap	2123.58	0.527398	0.0738129	7.14507	8.99511e-13	9.28684e-12
Nfkb1	306.494	2.15547	0.301679	7.14491	9.00567e-13	9.29131e-12
Tuba1b	28.8365	5.54068	0.775517	7.14451	9.03203e-13	9.31205e-12
Zeb1	2142.37	-0.779178	0.109171	-7.13722	9.52349e-13	9.81196e-12
Rpain	1316.77	-1.4154	0.198383	-7.13469	9.70038e-13	9.9873e-12
Ift74	118.624	-2.0563	0.288295	-7.13263	9.8471e-13	1.01314e-11
Rasgrp2	58.2495	-3.1165	0.437046	-7.13083	9.97641e-13	1.02573e-11
Mgst3	30.1604	5.55487	0.779017	7.13062	9.99184e-13	1.02661e-11
Gdpgp1	235.699	1.83724	0.257668	7.13024	1.00191e-12	1.02799e-11
Nrbf2	423.001	2.62656	0.368368	7.13025	1.00187e-12	1.02799e-11
Arid1a	9369.93	-1.05431	0.147896	-7.12869	1.01326e-12	1.03836e-11
Ropn1l	240.659	-1.25618	0.176216	-7.12867	1.0134e-12	1.03836e-11
Tnfsf10	58.1933	-3.69793	0.518929	-7.12609	1.03258e-12	1.05728e-11
Pcm1	214.076	2.34018	0.328466	7.12457	1.04407e-12	1.06831e-11
Senp3	1926.17	-0.784643	0.110171	-7.12203	1.06348e-12	1.08742e-11
Pla2g15	311.022	-2.00836	0.282019	-7.12138	1.06854e-12	1.09185e-11
Nrip3	944.641	-1.0935	0.153616	-7.11835	1.09227e-12	1.11533e-11
Ifitm2	61.349	3.2037	0.450252	7.11537	1.11617e-12	1.13895e-11
Tmem106b	565.806	1.01374	0.142485	7.11468	1.12171e-12	1.14382e-11
Arhgap39	509.061	-1.77362	0.249295	-7.11453	1.12291e-12	1.14426e-11
Tspan5	189.913	5.58139	0.785253	7.10777	1.17935e-12	1.20095e-11
Slmo2	1977.08	0.681779	0.0959572	7.10503	1.20294e-12	1.22414e-11
Clcn3	1670.63	1.01955	0.143538	7.10302	1.22057e-12	1.24123e-11
Aar2	550.229	1.01373	0.142812	7.09837	1.26236e-12	1.28236e-11
G3bp1	4898.42	-0.609923	0.0859249	-7.09833	1.26273e-12	1.28236e-11
Thbs2	26.8801	4.71554	0.66443	7.09712	1.27385e-12	1.29277e-11
Cacna2d2	122.577	1.72682	0.243346	7.09616	1.28268e-12	1.30085e-11
Cpne7	89.0492	5.69925	0.803188	7.09579	1.28619e-12	1.30352e-11
Sars2	1154.96	-0.749552	0.10565	-7.0947	1.29637e-12	1.31293e-11
Adipor1	2344.78	0.986566	0.13907	7.09404	1.30248e-12	1.31823e-11
Baiap2	553.21	-1.21411	0.171218	-7.09107	1.33082e-12	1.346e-11
Ehmt1	1794.68	-0.55534	0.0783511	-7.08784	1.36219e-12	1.37679e-11
Rrm2b	4733.11	-1.70041	0.239961	-7.0862	1.37842e-12	1.39225e-11
Mapk6	1381.93	-1.21485	0.171573	-7.08066	1.43474e-12	1.44815e-11
AA414768	75.4881	-2.20169	0.310949	-7.08054	1.43591e-12	1.44836e-11
Cables2	784.92	0.831679	0.117463	7.08032	1.43822e-12	1.4497e-11
Cmtm6	3362.33	0.714198	0.100882	7.07957	1.44604e-12	1.4566e-11
Dusp2	2931.69	-1.66297	0.234908	-7.07923	1.44954e-12	1.45914e-11
Pm20d1	737.684	1.9508	0.275609	7.07815	1.46087e-12	1.46955e-11
Ranbp10	3686.68	-1.00706	0.142281	-7.07792	1.46332e-12	1.47102e-11
Aaed1	359.272	1.28862	0.18215	7.07449	1.50002e-12	1.50689e-11
Cnn3	538.888	-3.68821	0.521435	-7.07319	1.51415e-12	1.52007e-11
Hdac10	766.476	0.836363	0.118281	7.07099	1.53831e-12	1.54328e-11
Sfxn5	1869.47	1.09215	0.154526	7.06776	1.57456e-12	1.57858e-11
Lpcat2	40.0529	3.54916	0.502171	7.06763	1.57597e-12	1.57894e-11
Havcr2	80.3651	5.28422	0.747869	7.0657	1.59808e-12	1.60001e-11
Ifitm6	36.9604	5.65721	0.800688	7.06544	1.60114e-12	1.60092e-11
Rps27a	6794.46	-0.967779	0.136973	-7.06546	1.6009e-12	1.60092e-11
Gm11346	719.19	1.40756	0.199294	7.06271	1.63285e-12	1.63154e-11
Usp1	530.54	-1.05058	0.148882	-7.05648	1.70777e-12	1.70525e-11
Vapa	69.54	5.90675	0.837386	7.05379	1.74108e-12	1.73735e-11
Nr4a3	1511.65	-2.57672	0.365302	-7.05367	1.74264e-12	1.73759e-11
Trip10	1049.61	2.07639	0.294374	7.05359	1.74365e-12	1.73759e-11
Parp8	2186.07	0.954335	0.135309	7.05299	1.7511e-12	1.74384e-11
Utp18	230.284	-3.54613	0.50279	-7.0529	1.75229e-12	1.74386e-11
Fcho2	1502.74	1.47087	0.208567	7.05226	1.76037e-12	1.75074e-11
Prkab1	1351.46	1.1646	0.165187	7.05017	1.787e-12	1.77604e-11
Btk	111.304	4.32164	0.613167	7.04807	1.81413e-12	1.80059e-11
Fam63a	397.826	0.935133	0.132678	7.04816	1.81294e-12	1.80059e-11
Exosc10	1815	-1.0765	0.152744	-7.04774	1.81841e-12	1.80364e-11
Miip	750.509	-1.16299	0.16538	-7.03219	2.0331e-12	2.01524e-11
Fam221a	66.0922	-2.41465	0.34338	-7.03201	2.03575e-12	2.01653e-11
Lpcat4	1390.05	1.41483	0.201222	7.03119	2.04779e-12	2.02711e-11
Prkcd	1884.14	0.838576	0.119302	7.02899	2.08031e-12	2.05793e-11
Zswim7	62.3394	5.09168	0.724815	7.0248	2.14377e-12	2.1193e-11
Aplp2	2215.39	2.22589	0.317332	7.01439	2.30953e-12	2.28014e-11
Smarcd1	3297.06	-1.0182	0.145158	-7.01443	2.30896e-12	2.28014e-11
Ypel4	259.105	-2.92681	0.417404	-7.01193	2.35055e-12	2.31911e-11
Rassf1	31.3091	4.67976	0.667481	7.01107	2.36496e-12	2.33177e-11
Ctdspl	94.7571	-2.48916	0.355087	-7.01002	2.38284e-12	2.34786e-11
B3gnt5	785.758	2.42915	0.34664	7.0077	2.42268e-12	2.38554e-11
Daglb	204.083	1.25184	0.178656	7.00698	2.43518e-12	2.39626e-11
Myl12b	34.0783	-4.59881	0.656423	-7.00586	2.45468e-12	2.41385e-11
Rufy1	993.395	1.30257	0.185949	7.00501	2.46971e-12	2.42703e-11
Siae	23.3385	5.78612	0.826026	7.00477	2.47392e-12	2.42956e-11
Rhbdl2	455.662	1.57688	0.225151	7.00365	2.49373e-12	2.4474e-11
Cr1l	1018.76	0.756114	0.107976	7.00262	2.51216e-12	2.46387e-11
Bhlhe40	1164.41	2.54076	0.362946	7.00038	2.55275e-12	2.50203e-11
Atrip	544.339	-0.925372	0.132273	-6.99591	2.63542e-12	2.58136e-11
Sncb	421.133	6.08276	0.869887	6.99258	2.6987e-12	2.64161e-11
Hdgf	4919.9	-0.951891	0.136275	-6.98506	2.84732e-12	2.78525e-11
Tlx2	60.9637	4.93247	0.706234	6.98419	2.86496e-12	2.80067e-11
Fhl2	135.139	1.70212	0.243722	6.98387	2.87163e-12	2.80535e-11
Tex35	598.896	-1.1403	0.163305	-6.98262	2.89733e-12	2.82859e-11
Rnf139	2948.42	1.91732	0.274626	6.98155	2.91933e-12	2.84821e-11
C030034I22Rik	218.54	1.33101	0.190651	6.98135	2.92352e-12	2.85044e-11
Gpr55	233.995	-4.04085	0.578825	-6.98113	2.92823e-12	2.85293e-11
Lfng	5663.46	1.18911	0.170334	6.98105	2.92992e-12	2.85293e-11
Nat6	220.166	1.41535	0.202764	6.98029	2.94564e-12	2.86637e-11
Rpl3	4627.82	-1.05711	0.151585	-6.97373	3.08653e-12	3.00151e-11
Slc47a2	161.102	2.02891	0.290948	6.97344	3.09273e-12	3.00557e-11
H2-T10	977.902	-0.8504	0.121962	-6.97269	3.10945e-12	3.01789e-11
Rgl2	1537.02	-3.03074	0.434655	-6.97275	3.10807e-12	3.01789e-11
Naa60	1731.15	-0.775293	0.11121	-6.97141	3.13773e-12	3.04336e-11
Pnoc	5107.3	-0.60272	0.0864572	-6.97131	3.14009e-12	3.04366e-11
Zyg11a	288.719	2.09817	0.301052	6.96947	3.18143e-12	3.08172e-11
Rhbdd3	451.345	1.52408	0.218692	6.96906	3.19074e-12	3.08873e-11
Lsm7	225.078	-1.41669	0.203408	-6.96474	3.29019e-12	3.18294e-11
Mbtps2	1613.76	-0.896501	0.128845	-6.95797	3.45199e-12	3.3373e-11
Gypa	383.982	6.14102	0.882894	6.95556	3.51167e-12	3.3928e-11
Rhoa	862.889	-1.08647	0.15622	-6.95472	3.53272e-12	3.41092e-11
Gspt1	3591.05	-0.657991	0.094619	-6.95411	3.548e-12	3.42346e-11
5031414D18Rik	66.8077	4.93096	0.709127	6.95356	3.56193e-12	3.43467e-11
Mybpc2	642.902	-2.24279	0.322587	-6.95251	3.58836e-12	3.45792e-11
Acan	27.9837	-5.71143	0.821902	-6.94905	3.67766e-12	3.54168e-11
Bbc3	617.482	1.81726	0.261543	6.94821	3.69943e-12	3.56034e-11
Eif1ax	1384.6	-0.931331	0.134071	-6.94657	3.74273e-12	3.59969e-11
Snrpc	4028.37	-0.902291	0.129904	-6.94582	3.76278e-12	3.61663e-11
Atrnl1	219.739	-1.46061	0.210363	-6.94329	3.83077e-12	3.67961e-11
Nhsl1	587.761	-1.17403	0.169103	-6.94271	3.84657e-12	3.69241e-11
Prop1	26.5877	4.87518	0.70244	6.94035	3.91117e-12	3.752e-11
Pde5a	1631.4	-2.07849	0.29981	-6.93271	4.12841e-12	3.95785e-11
Cnot2	2628.09	-0.781535	0.112755	-6.93129	4.17027e-12	3.99541e-11
Gpr34	138.378	2.93364	0.423805	6.92215	4.4485e-12	4.25924e-11
Arhgap12	829.743	0.684335	0.0989024	6.91929	4.53906e-12	4.34315e-11
Tmem246	647.282	2.19561	0.31738	6.91792	4.58319e-12	4.38256e-11
Shq1	226.645	1.44665	0.209184	6.91565	4.65725e-12	4.45053e-11
Zbtb32	385.157	1.86403	0.269558	6.91514	4.67391e-12	4.46358e-11
Pde4c	107.745	2.35841	0.341091	6.91432	4.70108e-12	4.48665e-11
Pycr1	594.205	1.70944	0.247282	6.91293	4.74734e-12	4.5279e-11
Ttc1	36.3663	5.08883	0.73635	6.91088	4.81652e-12	4.59094e-11
Ier3	96.3388	3.03591	0.439881	6.90166	5.13977e-12	4.89592e-11
Adam15	77.1276	2.13285	0.309088	6.90047	5.18318e-12	4.93413e-11
P2rx3	68.8345	-2.63709	0.38228	-6.89831	5.26233e-12	5.00627e-11
Ermp1	1159.06	0.848925	0.123066	6.89812	5.26937e-12	5.00977e-11
Hiatl1	1554.24	0.862732	0.125093	6.89675	5.32059e-12	5.05524e-11
Cdv3	1607.77	-0.823832	0.119513	-6.89325	5.45319e-12	5.17793e-11
Smad5	4284.17	2.04209	0.296323	6.89143	5.52344e-12	5.24128e-11
Ccdc28b	134.616	-1.69884	0.246659	-6.88741	5.68181e-12	5.38813e-11
Cds2	6381.9	1.09132	0.158454	6.88731	5.68554e-12	5.38824e-11
Jade3	453.423	-0.893553	0.129807	-6.88369	5.83234e-12	5.52102e-11
Pfn2	3378.05	1.36137	0.197768	6.88367	5.83305e-12	5.52102e-11
Pcid2	566.867	-0.932934	0.135576	-6.88127	5.93199e-12	5.61109e-11
Dpy19l1	2603.5	1.45132	0.211041	6.87694	6.11504e-12	5.78058e-11
Ankrd10	3067.45	-0.857516	0.124745	-6.87414	6.23659e-12	5.88669e-11
Hgsnat	635.338	0.84669	0.123171	6.87408	6.23903e-12	5.88669e-11
Scd3	206.478	5.16047	0.750714	6.87408	6.23915e-12	5.88669e-11
Plin5	703.585	1.24092	0.180593	6.87135	6.35972e-12	5.99665e-11
Adrb1	36.1703	4.6111	0.671524	6.86661	6.57455e-12	6.1953e-11
Gtf3c1	2355.81	-0.63398	0.0923527	-6.86477	6.65993e-12	6.27178e-11
Cd93	309.685	3.99114	0.581788	6.86012	6.88009e-12	6.47502e-11
Trat1	2884.47	0.964379	0.140711	6.85359	7.20177e-12	6.77348e-11
Prmt7	2185.36	-0.646377	0.094325	-6.85266	7.24913e-12	6.81373e-11
Ggt7	115.78	-2.20369	0.321783	-6.84839	7.46846e-12	7.01545e-11
5730559C18Rik	27.3514	-5.65842	0.82629	-6.84799	7.48973e-12	7.031e-11
Slc27a6	607.601	1.27524	0.186242	6.84726	7.52794e-12	7.06242e-11
Naca	1288.64	1.57252	0.229814	6.84257	7.77867e-12	7.29306e-11
Tspyl1	53.7289	5.94911	0.869557	6.84154	7.83488e-12	7.34114e-11
Cd74	3704.92	4.45582	0.651406	6.84032	7.90165e-12	7.39904e-11
Psmc5	151.551	-1.65663	0.242269	-6.83795	8.0332e-12	7.5175e-11
5330426P16Rik	198.166	1.80062	0.263383	6.83651	8.11446e-12	7.58878e-11
Usp5	4050.45	0.728283	0.10654	6.83577	8.15638e-12	7.62319e-11
Mttp	537.422	-3.04769	0.446515	-6.82549	8.76242e-12	8.18448e-11
Msh5	881.886	-0.922581	0.135186	-6.82452	8.82194e-12	8.23492e-11
Cpd	299.48	1.56177	0.229033	6.81898	9.16921e-12	8.55372e-11
Gdf11	200.285	2.78849	0.409026	6.81739	9.27078e-12	8.64306e-11
Spdl1	2447.82	0.661616	0.0971311	6.81158	9.653e-12	8.99377e-11
Tars	6130.36	-0.827738	0.12165	-6.80428	1.01558e-11	9.45634e-11
Syngr4	1014.77	1.14086	0.167759	6.80057	1.04204e-11	9.69662e-11
Prok1	61.6093	-2.65733	0.390827	-6.79925	1.05166e-11	9.78007e-11
Fbxo5	1166.06	-1.96589	0.289195	-6.7978	1.06229e-11	9.87271e-11
0610030E20Rik	1751.12	1.00203	0.147456	6.79542	1.07999e-11	1.0031e-10
Nck2	744.251	0.989198	0.145598	6.79405	1.09028e-11	1.01202e-10
AI846148	476.741	-1.01783	0.149862	-6.79179	1.10747e-11	1.02734e-10
Chd1l	1214.53	-0.669526	0.0985882	-6.79114	1.11248e-11	1.03135e-10
Dennd1b	1837.53	0.982151	0.144731	6.78603	1.1526e-11	1.06787e-10
Dmc1	26.5544	-4.86947	0.717784	-6.78403	1.16866e-11	1.08208e-10
Eif5a	9775.68	-0.919506	0.135622	-6.77989	1.20265e-11	1.11286e-10
Hps1	866.426	0.74862	0.11049	6.77544	1.24032e-11	1.14701e-10
Esyt2	5529.37	1.10155	0.162731	6.76917	1.29521e-11	1.19703e-10
H6pd	845.228	-1.0882	0.160774	-6.76847	1.30151e-11	1.2021e-10
Fgd2	124.092	4.4937	0.664471	6.76283	1.35326e-11	1.24912e-10
Eda2r	29.7528	5.74931	0.850148	6.76272	1.35426e-11	1.24928e-10
Camk2b	472.177	3.17178	0.469119	6.76115	1.36901e-11	1.2621e-10
Orm2	883.684	-1.45845	0.215806	-6.75813	1.39789e-11	1.28792e-10
Cd160	960.607	1.96068	0.290329	6.75331	1.44512e-11	1.33061e-10
St3gal5	190.126	-1.30499	0.193278	-6.75187	1.45956e-11	1.34309e-10
Clns1a	1554.54	-0.875152	0.129646	-6.75031	1.47526e-11	1.3567e-10
Ccpg1	1667.27	0.995271	0.147486	6.74824	1.49645e-11	1.37533e-10
Rap1gap2	8737.8	0.603066	0.0893728	6.74776	1.50149e-11	1.37911e-10
Acox3	1044.05	1.01687	0.150749	6.74543	1.52576e-11	1.40054e-10
Cyp2d22	160.853	1.91726	0.284275	6.7444	1.53664e-11	1.40966e-10
Lztfl1	432.586	-1.16644	0.172963	-6.7439	1.54187e-11	1.41359e-10
2017-03-04	60.7712	2.83723	0.420972	6.7397	1.5871e-11	1.45416e-10
Snx13	562.649	0.816456	0.121203	6.73626	1.62514e-11	1.4881e-10
Cdh17	21.2014	5.63036	0.835964	6.73517	1.63733e-11	1.49834e-10
Sp6	2609.3	0.942787	0.140011	6.73365	1.65459e-11	1.5132e-10
Chaf1b	793.208	-1.61978	0.240663	-6.73048	1.69105e-11	1.5456e-10
Daxx	1842.64	-0.71693	0.106548	-6.72869	1.71202e-11	1.56381e-10
Atl3	2910.61	0.494402	0.0734788	6.7285	1.71426e-11	1.56489e-10
Rab4a	1288.81	1.43964	0.213991	6.72759	1.72498e-11	1.57371e-10
Klra2	28.7326	5.11265	0.759979	6.72736	1.72772e-11	1.57525e-10
Gm4759	1765.98	2.13205	0.316946	6.72684	1.73382e-11	1.57984e-10
Cndp2	1638.81	0.950938	0.141399	6.72522	1.75325e-11	1.59657e-10
Cactin	1475.43	-0.663593	0.0986781	-6.72482	1.75804e-11	1.59996e-10
Arhgap6	31.4664	3.67043	0.546068	6.72156	1.79795e-11	1.63428e-10
Magoh	1106.67	-1.63842	0.243755	-6.72159	1.79749e-11	1.63428e-10
Tuba3a	1188.65	-1.45416	0.216392	-6.72001	1.81712e-11	1.65069e-10
Pld3	68.9962	5.04604	0.751268	6.7167	1.85889e-11	1.68762e-10
Larp7	1283.61	-1.07315	0.159883	-6.71209	1.91861e-11	1.74077e-10
Alox12	29.7919	4.37565	0.652045	6.71065	1.93761e-11	1.75694e-10
Slc18a2	1686.06	1.01423	0.151142	6.71047	1.94003e-11	1.75806e-10
Mmrn1	53.3003	5.8715	0.875136	6.70924	1.95635e-11	1.77177e-10
Smek1	2136.59	0.920066	0.137149	6.7085	1.96641e-11	1.7798e-10
Gng2	1445.89	0.904973	0.134906	6.70818	1.97065e-11	1.78256e-10
Atp11b	7859.46	1.0424	0.155398	6.70797	1.97344e-11	1.784e-10
Ubiad1	1756.19	-1.09372	0.163253	-6.69953	2.09084e-11	1.88898e-10
Tspan2	22.1318	4.95002	0.738895	6.69922	2.09538e-11	1.89193e-10
Nr1h3	1024.08	1.86757	0.278798	6.69865	2.10357e-11	1.89818e-10
Serpinb12	21.5622	5.61972	0.839007	6.69806	2.11211e-11	1.90473e-10
Smpdl3a	1608.16	-1.23331	0.184193	-6.69574	2.14583e-11	1.93398e-10
Arid3a	300.395	1.08139	0.161622	6.69087	2.21854e-11	1.9983e-10
Sparc	2419.2	0.774687	0.115794	6.69022	2.22833e-11	2.0059e-10
Shroom1	1295.13	1.0934	0.163547	6.68556	2.30041e-11	2.06954e-10
Dennd5b	38.1741	5.49088	0.821417	6.68465	2.31481e-11	2.08123e-10
Plcl1	92.9843	3.87969	0.580412	6.68438	2.3191e-11	2.08383e-10
Nucks1	2514.81	0.799934	0.119702	6.68273	2.34527e-11	2.10608e-10
Ptprr	29.1811	4.71451	0.705535	6.68218	2.35408e-11	2.11272e-10
Gna13	5675.67	0.78682	0.117796	6.67952	2.39723e-11	2.15015e-10
Blvrb	199.423	3.03001	0.453705	6.67837	2.41619e-11	2.16455e-10
Lmbrd1	744.946	1.18899	0.178033	6.67845	2.41487e-11	2.16455e-10
Lpxn	1731.34	0.91529	0.137067	6.6777	2.42721e-11	2.17312e-10
Hnrnpc	5570.32	-0.747711	0.111989	-6.67664	2.44484e-11	2.18758e-10
Ndufa7	360.091	-1.04906	0.157127	-6.67651	2.44701e-11	2.18821e-10
Ccdc17	88.4717	2.13624	0.319974	6.6763	2.45043e-11	2.18864e-10
Eif4h	5725.18	-0.618388	0.092624	-6.67632	2.45013e-11	2.18864e-10
Card6	2564.6	1.25193	0.18757	6.67447	2.48122e-11	2.21481e-10
Dhcr24	866.809	-1.12052	0.167887	-6.67426	2.48483e-11	2.21671e-10
Scn10a	33.9889	-3.5543	0.532598	-6.67352	2.49746e-11	2.22664e-10
Slc35d2	830.072	0.792924	0.118835	6.67248	2.51522e-11	2.24113e-10
H2-DMb1	102.477	3.61502	0.541823	6.67196	2.52411e-11	2.24771e-10
Samt2	551.151	0.762322	0.114323	6.66815	2.59047e-11	2.30542e-10
Hps6	291.068	1.14802	0.172182	6.66747	2.60246e-11	2.31471e-10
Tmem38a	28.1203	-4.21587	0.632329	-6.6672	2.6073e-11	2.31763e-10
Zmat2	725.879	1.11094	0.166697	6.66444	2.6567e-11	2.36014e-10
Impa2	462.469	-1.30442	0.195841	-6.66062	2.72668e-11	2.41942e-10
St3gal6	1143.12	1.53727	0.230798	6.66069	2.72541e-11	2.41942e-10
Lphn1	3689.52	-0.844927	0.126888	-6.65886	2.75967e-11	2.44724e-10
Hdc	69.4007	3.70974	0.557176	6.65811	2.77377e-11	2.45682e-10
Nlrp14	33.4588	5.21575	0.783364	6.65814	2.77322e-11	2.45682e-10
Pmel	486.646	2.077	0.31198	6.6575	2.78525e-11	2.46552e-10
Zwint	1643.88	-0.692014	0.103992	-6.65448	2.84304e-11	2.51518e-10
Cog5	914.774	0.783816	0.117796	6.65404	2.85163e-11	2.52128e-10
Dntt	5007.74	-6.07684	0.913871	-6.64956	2.93976e-11	2.59766e-10
Lrp5	388.018	-2.69764	0.405818	-6.64742	2.98273e-11	2.63407e-10
Clhc1	119.398	-2.40096	0.361301	-6.64532	3.02565e-11	2.66962e-10
Mc1r	3051	-0.61051	0.0918713	-6.64527	3.02657e-11	2.66962e-10
Slc29a3	1802.89	-1.31292	0.197638	-6.64303	3.07295e-11	2.70892e-10
Map3k1	2510.68	0.603268	0.0908264	6.64199	3.09481e-11	2.72658e-10
Afmid	524.859	1.63108	0.245598	6.64124	3.11058e-11	2.73886e-10
F2rl3	186.913	1.72512	0.259913	6.6373	3.19472e-11	2.81128e-10
Mmp13	49.7391	-3.34198	0.503638	-6.63568	3.23018e-11	2.8408e-10
Tk2	146.706	-1.78901	0.26988	-6.6289	3.38189e-11	2.97247e-10
Alcam	83.6651	2.89462	0.436697	6.62843	3.39275e-11	2.98026e-10
Ilkap	1426.68	-0.57542	0.0868757	-6.62349	3.50815e-11	3.07981e-10
Atad5	1169.09	-1.31531	0.198612	-6.62249	3.53193e-11	3.09886e-10
Tbc1d22a	1313.28	1.05124	0.158798	6.61999	3.59234e-11	3.15001e-10
Eps8	39.9639	5.29737	0.800225	6.61985	3.59559e-11	3.151e-10
Hbs1l	1104.03	-0.739939	0.111793	-6.61882	3.6209e-11	3.17132e-10
Trdmt1	271.481	-4.16043	0.628758	-6.61691	3.66788e-11	3.21058e-10
Phf11d	298.269	1.03704	0.156733	6.61661	3.67529e-11	3.21518e-10
Snrpb	884.102	-0.957539	0.144764	-6.61449	3.72832e-11	3.25965e-10
Nlrp4b	21.4251	4.8826	0.738221	6.61402	3.74034e-11	3.26824e-10
Smtnl1	834.999	-1.22865	0.185852	-6.61093	3.81912e-11	3.33512e-10
Pag1	252.939	-1.15132	0.17419	-6.60956	3.85459e-11	3.36413e-10
Amfr	2927.98	0.591352	0.0894739	6.60921	3.86385e-11	3.37024e-10
1110007C09Rik	369.704	1.86649	0.282493	6.60722	3.91614e-11	3.41246e-10
Crip1	3454.03	0.851104	0.128815	6.60719	3.91684e-11	3.41246e-10
Sppl2c	2422.5	0.632419	0.0957201	6.60696	3.92284e-11	3.41569e-10
Nr5a1	238.314	-3.04463	0.460926	-6.60546	3.96285e-11	3.44851e-10
Atp2a2	3729.15	-0.620596	0.0940558	-6.59817	4.1627e-11	3.6182e-10
Ccr1	35.1599	5.19608	0.787496	6.59823	4.16098e-11	3.6182e-10
Irf2	1882.67	0.865268	0.131194	6.59531	4.24364e-11	3.6864e-10
Usp8	484.089	-1.20503	0.182785	-6.59263	4.32092e-11	3.75134e-10
Tyms	2379.38	0.683383	0.103679	6.5913	4.35981e-11	3.7829e-10
Uckl1os	1573.66	-1.0019	0.152018	-6.59064	4.37935e-11	3.79765e-10
Atp6v0e	1299.37	0.635364	0.096439	6.58825	4.45035e-11	3.85697e-10
Kcna3	1024.51	-1.04245	0.158271	-6.5865	4.50318e-11	3.90049e-10
Apbb1	91.3721	1.98027	0.300816	6.583	4.61053e-11	3.99115e-10
Lactb2	358.488	0.896348	0.136305	6.57604	4.83137e-11	4.17888e-10
Notch3	6042.72	-0.831297	0.126414	-6.57599	4.83301e-11	4.17888e-10
B2m	43415	0.933696	0.142097	6.57082	5.00384e-11	4.32408e-10
Selk	70.0897	3.03799	0.4624	6.57004	5.03017e-11	4.34432e-10
Pamr1	287.165	2.08393	0.317199	6.56979	5.03857e-11	4.34906e-10
Epha3	29.9093	5.65433	0.860703	6.56943	5.05085e-11	4.35712e-10
Tnfsf12Tnfsf13	137.992	-3.44902	0.52502	-6.56932	5.05458e-11	4.35782e-10
Fnbp4	4666.01	-0.476751	0.0725743	-6.56915	5.06034e-11	4.36027e-10
Erf	821.814	-1.22059	0.185819	-6.56871	5.07515e-11	4.3705e-10
Pik3cb	1308.27	0.808765	0.123158	6.56689	5.13781e-11	4.4219e-10
Chchd6	98.6496	-2.35276	0.358448	-6.56375	5.24705e-11	4.51331e-10
Dmxl2	30.461	4.67838	0.713165	6.56003	5.37978e-11	4.62481e-10
Pde6a	962.452	1.22558	0.186929	6.55639	5.5125e-11	4.73617e-10
Slfn5os	98.2714	4.48527	0.684382	6.55375	5.61106e-11	4.81808e-10
Tmem261	27.1765	5.61522	0.857311	6.54981	5.76102e-11	4.94399e-10
Gapdh	6526.45	-1.03442	0.158054	-6.54473	5.96023e-11	5.11201e-10
Mapre3	402.681	2.80501	0.428629	6.54414	5.98371e-11	5.12624e-10
Ndufs1	266.926	-1.13356	0.173216	-6.54422	5.98054e-11	5.12624e-10
Mtrf1	5133.71	0.848794	0.129715	6.54352	6.00878e-11	5.14476e-10
Arpc5	5385.96	0.644382	0.098484	6.54301	6.02928e-11	5.15934e-10
Ttc9	1452.39	1.78252	0.272559	6.53993	6.15483e-11	5.26376e-10
Psmb9	1806.11	-0.866326	0.132528	-6.53694	6.27917e-11	5.36702e-10
Dffb	418.578	-1.31136	0.20066	-6.53524	6.35092e-11	5.42523e-10
Gdpd5	118.254	1.67783	0.25675	6.53487	6.36656e-11	5.43547e-10
4930506M07Rik	57.4512	5.11086	0.782452	6.53185	6.49616e-11	5.5366e-10
Dnajc11	902.207	-0.996569	0.152569	-6.53192	6.4934e-11	5.5366e-10
Sorcs2	83.3075	2.12321	0.325052	6.5319	6.49388e-11	5.5366e-10
Psmd3	1792.11	-0.563121	0.0862183	-6.53134	6.51826e-11	5.55226e-10
Gas2l1	32.711	3.9047	0.598058	6.52897	6.62249e-11	5.63761e-10
Plekhg5	592.169	2.40779	0.36879	6.52889	6.62603e-11	5.63761e-10
4931428F04Rik	134.074	-1.473	0.225693	-6.52659	6.72837e-11	5.71853e-10
Cdk14	32.9778	4.92503	0.754611	6.52658	6.72881e-11	5.71853e-10
Slbp	35.9124	5.42209	0.830922	6.52539	6.78262e-11	5.76098e-10
Fxn	226.454	-1.21692	0.186568	-6.52264	6.90787e-11	5.86402e-10
Fcrla	80.2888	4.48898	0.688283	6.52199	6.9379e-11	5.88615e-10
Cdip1	856.973	-0.721833	0.11074	-6.51824	7.11382e-11	6.03197e-10
Csnk1e	802.9	-1.16175	0.178268	-6.51688	7.17848e-11	6.08333e-10
Fech	911.882	2.14483	0.329212	6.51502	7.26778e-11	6.15551e-10
Pcca	81.1508	-3.34413	0.513345	-6.51439	7.2988e-11	6.17827e-10
Lsm2	605.771	-1.04279	0.160082	-6.5141	7.3125e-11	6.18635e-10
Srp14	947.924	-1.62534	0.249596	-6.51186	7.42241e-11	6.27577e-10
Slc2a4rg-ps	1491.36	1.1181	0.171726	6.51095	7.46753e-11	6.31034e-10
Nudt9	221.298	1.6897	0.259634	6.50802	7.61466e-11	6.43102e-10
Akr1c12	70.0426	4.58068	0.70388	6.50776	7.62802e-11	6.43865e-10
Zfp189	23.6003	-5.02853	0.772713	-6.50763	7.63462e-11	6.44058e-10
Chst12	289.43	1.14812	0.176473	6.50593	7.72133e-11	6.51004e-10
Zfp235	883.419	-1.39279	0.214086	-6.50576	7.73041e-11	6.51401e-10
Hexim1	1767.95	-1.19404	0.183575	-6.50437	7.80221e-11	6.57079e-10
Scmh1	323.847	-1.02009	0.156866	-6.50292	7.87771e-11	6.63063e-10
5031425F14Rik	47.3904	4.62917	0.711899	6.50257	7.89578e-11	6.64208e-10
Gtf2h4	462.206	-0.953704	0.146678	-6.50204	7.92373e-11	6.66184e-10
Slc35a4	460.954	0.845932	0.130105	6.50191	7.93046e-11	6.66373e-10
Adsl	1507.36	-0.773293	0.118949	-6.50104	7.97657e-11	6.6987e-10
Cep152	977.773	-0.823758	0.126837	-6.49462	8.32406e-11	6.98658e-10
Tlr6	31.0903	5.3277	0.820499	6.49325	8.40047e-11	7.04675e-10
Zscan10	495.073	1.13336	0.174605	6.49102	8.52595e-11	7.14798e-10
Clpb	485.646	-0.867752	0.133836	-6.48372	8.94887e-11	7.49833e-10
Ebf1	52.7005	4.93452	0.761099	6.48342	8.96661e-11	7.50897e-10
Agps	2036.6	0.664674	0.102528	6.48287	8.9997e-11	7.53244e-10
Ccdc18	213.94	-2.68516	0.414315	-6.48097	9.11333e-11	7.61932e-10
Fkbp1a	1729.3	-0.608609	0.0939072	-6.48097	9.11373e-11	7.61932e-10
Sv2b	5149.04	-0.730043	0.112675	-6.47917	9.22265e-11	7.70606e-10
AI607873	47.1394	4.84342	0.74789	6.47611	9.41147e-11	7.85942e-10
Exo1	455.201	-2.05029	0.316832	-6.47122	9.72157e-11	8.11383e-10
Emg1	2003.08	-0.61358	0.0948185	-6.4711	9.72904e-11	8.11553e-10
Stau1	3390.15	-1.05073	0.162457	-6.46777	9.94609e-11	8.29193e-10
Ap5b1	462.443	1.91346	0.295884	6.46693	1.00016e-10	8.33358e-10
Zfp687	304.377	0.94593	0.146302	6.4656	1.00897e-10	8.40225e-10
Inpp1	896.738	0.94361	0.146012	6.46257	1.02939e-10	8.56755e-10
Cd14	22.0291	5.15404	0.797677	6.46131	1.03802e-10	8.63451e-10
Zadh2	2701.47	-0.548443	0.0849124	-6.45893	1.05445e-10	8.76627e-10
Mocs2	43.1028	3.55449	0.550352	6.45858	1.05693e-10	8.78201e-10
Ulk4	1489.68	0.778783	0.120594	6.45788	1.06177e-10	8.81731e-10
Ddx3x	9994.3	-1.00148	0.155109	-6.45657	1.07101e-10	8.88907e-10
Slc41a2	267.675	5.84922	0.906013	6.456	1.07505e-10	8.91764e-10
Raly	363.824	-1.11474	0.172688	-6.45523	1.08057e-10	8.95846e-10
Dhrs11	309.497	2.163	0.335092	6.45496	1.08247e-10	8.96422e-10
Il1rl1	36.4639	5.37051	0.831995	6.45498	1.08235e-10	8.96422e-10
Mdm4	667.066	-1.7155	0.265826	-6.45346	1.09323e-10	9.04827e-10
Arl6ip5	4400.82	0.668989	0.103675	6.45275	1.09837e-10	9.08582e-10
Itgb2	14410.7	1.41255	0.218955	6.45132	1.10877e-10	9.16677e-10
Padi6	26.1679	-4.08997	0.634151	-6.44953	1.12201e-10	9.27104e-10
Sptssa	1293.28	0.770838	0.119525	6.44917	1.12463e-10	9.28751e-10
Nr0b2	280.163	1.24393	0.192892	6.44886	1.12692e-10	9.29619e-10
Spcs1	606.242	-2.1362	0.331248	-6.44895	1.12631e-10	9.29619e-10
Cacna1i	37.985	5.01208	0.777361	6.44755	1.13669e-10	9.37159e-10
Scfd1	26.8172	-3.92786	0.609609	-6.44325	1.16943e-10	9.63617e-10
Ifi27l2a	872.206	-2.90701	0.451197	-6.4429	1.17212e-10	9.65294e-10
Phf11a	2325.94	1.05596	0.163959	6.4404	1.19157e-10	9.80334e-10
Rap1gds1	22.3476	4.85641	0.754056	6.44039	1.19169e-10	9.80334e-10
Ppp1r14d	756.768	-1.30262	0.202327	-6.4382	1.20903e-10	9.94043e-10
Abca1	1109.57	-1.58232	0.245842	-6.43634	1.2239e-10	1.00572e-09
Abl1	2753.17	-0.92186	0.143255	-6.43511	1.23387e-10	1.01335e-09
Birc5	1375.83	-1.87456	0.291427	-6.43233	1.25659e-10	1.03144e-09
Cyld	4107.18	0.856876	0.133263	6.42998	1.27619e-10	1.04695e-09
Clec4e	27.163	5.55339	0.863735	6.42951	1.28016e-10	1.04963e-09
Phf12	511.107	-1.07266	0.166897	-6.42706	1.30092e-10	1.06607e-09
Cym	62.1836	5.39404	0.839326	6.42663	1.3046e-10	1.0685e-09
Xkrx	98.2523	1.64586	0.256195	6.42427	1.32504e-10	1.08464e-09
Mroh2b	1153.6	0.893285	0.139067	6.4234	1.33259e-10	1.09022e-09
Slc15a5	40.8147	4.01685	0.625364	6.42322	1.3342e-10	1.09094e-09
Yif1a	1178.58	-0.851057	0.132576	-6.41937	1.36843e-10	1.11832e-09
Ahdc1	959.318	-1.7077	0.266164	-6.41597	1.3993e-10	1.14291e-09
4930426D05Rik	51.7751	5.69374	0.887455	6.41582	1.40071e-10	1.14344e-09
Plekhs1	654.645	-2.45348	0.38244	-6.41534	1.40506e-10	1.14636e-09
Vpreb1	1746.1	1.5536	0.242281	6.41239	1.43251e-10	1.16812e-09
Mnda	38.4746	-2.99801	0.467748	-6.40947	1.46029e-10	1.19012e-09
Actl6a	1749.06	-0.835813	0.130422	-6.40855	1.46911e-10	1.19665e-09
Pigm	952.006	0.904191	0.141118	6.40733	1.48088e-10	1.20558e-09
Alkbh1	832.54	-1.16358	0.181608	-6.40709	1.48322e-10	1.20682e-09
Tmem154	21.9166	4.86024	0.75899	6.40356	1.51794e-10	1.2344e-09
Hadha	2671.81	-0.490391	0.0765894	-6.40285	1.52503e-10	1.23949e-09
Pbdc1	2155.45	-0.576121	0.0900258	-6.39951	1.55875e-10	1.26621e-09
Ncstn	36.0622	5.60462	0.876312	6.39569	1.59827e-10	1.29761e-09
Nifk	459.39	5.88493	0.920416	6.39378	1.61839e-10	1.31322e-09
Morn2	1258.93	-0.747356	0.116979	-6.38878	1.67214e-10	1.3561e-09
Dbi	665.925	-1.15914	0.181453	-6.38812	1.67937e-10	1.36048e-09
Zbtb2	743.482	-1.10188	0.172487	-6.38819	1.67856e-10	1.36048e-09
Dis3	1089.56	-0.774279	0.121219	-6.38744	1.68685e-10	1.3658e-09
Pbx3	25.423	4.5256	0.708617	6.38652	1.69706e-10	1.37332e-09
Themis	941.641	-1.26771	0.198542	-6.38513	1.71253e-10	1.38508e-09
Herc4	2315.45	0.884909	0.138647	6.38244	1.74284e-10	1.40884e-09
Alg13	255.12	-1.20542	0.188919	-6.3806	1.7639e-10	1.42509e-09
Napa	3840.91	-0.467339	0.0732553	-6.37958	1.77569e-10	1.43384e-09
Gpr137b	23.4394	4.25976	0.668002	6.37687	1.80745e-10	1.45869e-09
Synj2bp	1566.06	0.855021	0.134085	6.37672	1.80921e-10	1.45932e-09
Eepd1	61.1997	-2.58609	0.405597	-6.376	1.81774e-10	1.46541e-09
Smyd2	2338.27	-0.788633	0.123693	-6.37575	1.82067e-10	1.46697e-09
Mcf2l	26.6319	5.22655	0.819816	6.37527	1.82641e-10	1.4708e-09
Apol9b	48.3688	-2.97336	0.466461	-6.37429	1.83808e-10	1.4794e-09
Yy1	2129.15	1.31653	0.206559	6.37362	1.84621e-10	1.48515e-09
Tdpoz2	1089.64	-0.808132	0.126816	-6.37248	1.85998e-10	1.49541e-09
Mylk	20.1571	5.09248	0.799736	6.3677	1.91885e-10	1.54191e-09
Cgrrf1	137.2	1.67005	0.262329	6.36624	1.93721e-10	1.55583e-09
Bmi1	930.833	-0.913079	0.143472	-6.36414	1.96385e-10	1.57637e-09
Col6a2	21.2801	-5.34921	0.840805	-6.36201	1.99134e-10	1.59672e-09
Marveld2	432.486	0.854201	0.134266	6.36202	1.99123e-10	1.59672e-09
Lck	16587.3	-0.992163	0.15598	-6.36083	2.00668e-10	1.60815e-09
Irgm2	931.518	1.95663	0.307809	6.35664	2.06215e-10	1.65172e-09
Gm12216	120.56	2.10113	0.330568	6.35612	2.06916e-10	1.65644e-09
Ptpn20	1538.67	0.550578	0.0866366	6.35502	2.08393e-10	1.66737e-09
4930452B06Rik	24.9374	-4.26245	0.670932	-6.35303	2.11112e-10	1.68821e-09
Abcc3	47.1165	5.23263	0.82372	6.35244	2.1193e-10	1.69385e-09
Prkd1	2116.09	-0.559353	0.0880777	-6.35067	2.14381e-10	1.71252e-09
Banf1	2225.78	-0.964485	0.151888	-6.34999	2.15333e-10	1.7192e-09
Hat1	1330.43	-1.06207	0.16727	-6.34941	2.16145e-10	1.72476e-09
Dram2	365.618	1.01456	0.159838	6.34739	2.18996e-10	1.74657e-09
Golga1	715.87	0.925007	0.145754	6.34634	2.20492e-10	1.75757e-09
Ehbp1l1	1574.29	1.47798	0.232925	6.34531	2.21978e-10	1.76846e-09
Tmem9b	150.882	-1.69583	0.267518	-6.33915	2.31043e-10	1.8397e-09
Wipf3	7579.77	1.24859	0.196982	6.33856	2.31919e-10	1.84569e-09
Lig4	418.576	-1.13428	0.17896	-6.33817	2.32507e-10	1.84938e-09
Zfp939	160.925	2.67532	0.42243	6.33316	2.40189e-10	1.90946e-09
Paip2	3020.15	-0.735054	0.116068	-6.33295	2.4051e-10	1.911e-09
Sipa1l3	2515.85	-0.852614	0.134646	-6.33228	2.41563e-10	1.91834e-09
Polb	1549.45	-1.61659	0.255382	-6.33011	2.4499e-10	1.94452e-09
Ticam1	575.266	-1.03173	0.163025	-6.3287	2.47238e-10	1.96131e-09
Cd40	35.2405	5.56044	0.878779	6.32746	2.49233e-10	1.97609e-09
Col15a1	53.0303	-2.30275	0.364026	-6.32578	2.51956e-10	1.99662e-09
Gtf2a1	534.382	0.86284	0.136454	6.32332	2.56006e-10	2.02764e-09
Gcnt1	84.6398	3.99318	0.631565	6.32267	2.57083e-10	2.03508e-09
Gpalpp1	1387.21	0.599423	0.0948075	6.32253	2.57322e-10	2.03589e-09
Lrg1	23.2585	5.45284	0.862739	6.32038	2.60924e-10	2.0633e-09
Tspan33	681.414	1.01837	0.161165	6.31881	2.63579e-10	2.08318e-09
Fnip2	133.484	2.65875	0.421078	6.31415	2.71655e-10	2.14587e-09
Ggta1	620.714	-1.16381	0.184408	-6.31107	2.77119e-10	2.18672e-09
Slc5a2	49.466	4.24005	0.671841	6.31109	2.77072e-10	2.18672e-09
Anapc5	7067.4	-0.817426	0.129531	-6.31066	2.77851e-10	2.19133e-09
Pbld2	604.889	-2.26812	0.359422	-6.31047	2.78185e-10	2.19281e-09
Ptrf	346.829	1.44061	0.228349	6.30879	2.81234e-10	2.21566e-09
Hspb11	147.436	-3.08588	0.489242	-6.30747	2.83633e-10	2.23339e-09
Ezh1	1733.51	1.17545	0.186378	6.30677	2.8491e-10	2.24225e-09
Pola2	1743.43	-0.577383	0.0915719	-6.30524	2.8775e-10	2.26341e-09
Clip1	2620.68	0.836486	0.132684	6.30435	2.894e-10	2.27519e-09
Adamts14	514.156	3.16317	0.501862	6.30287	2.92185e-10	2.29538e-09
Dstn	399.739	1.04791	0.166262	6.30278	2.92353e-10	2.29538e-09
Myo1e	1217.67	1.09146	0.173173	6.30274	2.9243e-10	2.29538e-09
Armcx6	33.0319	-3.6288	0.57587	-6.30143	2.9492e-10	2.3137e-09
Rab28	1922.25	0.719641	0.114258	6.29837	3.00794e-10	2.35854e-09
Gbp2	1531.4	0.991387	0.157426	6.29748	3.02529e-10	2.3709e-09
Ankib1	2140.26	0.843439	0.133976	6.29544	3.06537e-10	2.40105e-09
2010015L04Rik	48.1143	-3.55862	0.565321	-6.29487	3.07663e-10	2.4086e-09
2810408A11Rik	85.5648	-2.16521	0.343989	-6.29442	3.08558e-10	2.41433e-09
Osbpl5	641.885	0.714687	0.113573	6.29275	3.11896e-10	2.43918e-09
Ube2i	1910.3	1.13628	0.180603	6.29156	3.14283e-10	2.45656e-09
4921524J17Rik	341.787	-1.08139	0.171895	-6.29098	3.15462e-10	2.46318e-09
Celf1	6938.99	0.467989	0.0743897	6.29104	3.15345e-10	2.46318e-09
Edem1	8771	-0.880318	0.140134	-6.28197	3.3431e-10	2.60899e-09
Pi4k2b	23.5737	5.11599	0.814527	6.28093	3.36543e-10	2.62504e-09
Snrpd3	1302.2	-1.49028	0.237363	-6.27849	3.41875e-10	2.66523e-09
Litaf	199.296	1.23311	0.196455	6.27684	3.45514e-10	2.69219e-09
Chrna9	23.5443	-4.64734	0.740435	-6.2765	3.46286e-10	2.6968e-09
Bphl	169.517	-1.66618	0.265533	-6.27486	3.49958e-10	2.72397e-09
Psmc6	2176.59	-0.787146	0.125447	-6.27474	3.50221e-10	2.72459e-09
Mllt10	37.0781	2.97036	0.473526	6.27286	3.54479e-10	2.75628e-09
Pik3r1	1614.68	0.749143	0.119515	6.26821	3.65228e-10	2.83838e-09
Tbc1d23	2479.6	1.15608	0.184529	6.26505	3.72695e-10	2.8949e-09
Armc7	1982.51	1.60498	0.256253	6.26326	3.77011e-10	2.92689e-09
Pex19	338.699	-0.926807	0.148011	-6.26174	3.8071e-10	2.95407e-09
Orc1	463.004	1.2062	0.192634	6.26163	3.80971e-10	2.95456e-09
Asxl1	2919.06	-0.69311	0.110698	-6.26126	3.81879e-10	2.96006e-09
Etohi1	282.131	1.53202	0.244845	6.25711	3.92179e-10	3.03832e-09
Gemin2	293.992	-0.93505	0.149458	-6.25629	3.94251e-10	3.05278e-09
C330027C09Rik	1297.46	-1.82884	0.292393	-6.25472	3.98222e-10	3.08193e-09
Sgpl1	647.788	-1.70288	0.272286	-6.25401	4.00044e-10	3.09442e-09
Gm2a	1570.54	1.07571	0.172152	6.24857	4.14221e-10	3.20242e-09
Gm12250	639.764	1.85793	0.297414	6.24694	4.1856e-10	3.23429e-09
Abcd3	549.522	-0.918143	0.147012	-6.24537	4.22801e-10	3.26536e-09
Qsox2	713.07	-0.987691	0.158155	-6.24509	4.23569e-10	3.2696e-09
Ube2v1	271.917	-1.13677	0.182038	-6.24469	4.24655e-10	3.27629e-09
Zrsr2	331.351	-1.4622	0.234164	-6.24434	4.25583e-10	3.28175e-09
Appl2	1059.86	-1.22052	0.195465	-6.24417	4.2605e-10	3.28365e-09
Hpse	59.6482	2.87158	0.459895	6.24398	4.26584e-10	3.28607e-09
Mrpl15	609.289	-0.914421	0.146485	-6.2424	4.30905e-10	3.31764e-09
Sash3	1849.75	-0.664911	0.106528	-6.24168	4.32898e-10	3.33125e-09
Lmnb1	4643.77	-1.75185	0.280761	-6.23967	4.38488e-10	3.37253e-09
Capn1	3846.35	0.787236	0.126216	6.23719	4.45491e-10	3.42462e-09
Rusc2	2644.34	0.795654	0.12758	6.23649	4.47487e-10	3.4382e-09
C2cd5	1252.4	-0.546357	0.0876095	-6.23627	4.48116e-10	3.44126e-09
Smarca2	6737.22	1.59553	0.255928	6.23431	4.53769e-10	3.48287e-09
Bcar3	37.2167	5.0702	0.813324	6.23392	4.54901e-10	3.48796e-09
Zfp12	93.6718	2.39139	0.383609	6.23394	4.54833e-10	3.48796e-09
Arhgap25	1670.79	0.976911	0.156728	6.23315	4.57137e-10	3.50331e-09
Snrpn	150.57	-1.47487	0.236725	-6.23032	4.65474e-10	3.56536e-09
Cln3	1305.88	1.2729	0.204362	6.22863	4.70523e-10	3.60218e-09
Uimc1	1978.9	1.07942	0.173354	6.2267	4.76375e-10	3.64511e-09
Alox8	36.1771	4.01764	0.645457	6.22449	4.83116e-10	3.69479e-09
Dap3	1750.42	-0.563384	0.090526	-6.22345	4.86329e-10	3.71746e-09
Lrp8	413.769	-2.29174	0.368291	-6.22262	4.88913e-10	3.7353e-09
Anapc11	924.248	0.595813	0.0957907	6.21995	4.9731e-10	3.7975e-09
Farsa	1328.19	-0.649543	0.104465	-6.21781	5.04142e-10	3.8477e-09
Phf7	955.909	-0.994479	0.15998	-6.21628	5.0908e-10	3.8834e-09
Cd48	2869.66	1.06175	0.170852	6.21444	5.15086e-10	3.9272e-09
Ankrd44	7490.35	0.646892	0.104105	6.21382	5.1711e-10	3.93659e-09
Fip1l1	2172.72	-0.640265	0.103038	-6.21387	5.16938e-10	3.93659e-09
Plp1	71.8403	-3.66767	0.59023	-6.21397	5.16621e-10	3.93659e-09
Sox5os3	1131.31	-5.50555	0.886098	-6.21325	5.19e-10	3.94896e-09
Usp22	1075.98	1.56743	0.252378	6.21064	5.27683e-10	4.01298e-09
Rpl32	5873.13	-1.14557	0.184528	-6.20812	5.36206e-10	4.07571e-09
Plekhm3	1501.92	0.876893	0.14126	6.20766	5.37783e-10	4.08562e-09
Cxadr	132.727	2.53176	0.407891	6.20695	5.40234e-10	4.10214e-09
Pcnp	1949.01	1.16419	0.187796	6.19924	5.67374e-10	4.30603e-09
Sel1l3	1983.08	0.647008	0.104371	6.19911	5.67837e-10	4.30735e-09
Mppe1	528.142	-1.07041	0.172717	-6.19749	5.737e-10	4.34961e-09
Plxnb3	177.564	-3.3311	0.537747	-6.19455	5.84529e-10	4.42945e-09
Abcb8	460.843	-1.22628	0.198028	-6.19245	5.92355e-10	4.48648e-09
Wdr83	1145.56	0.972103	0.157001	6.19169	5.95214e-10	4.50584e-09
Penk	995.377	-0.621624	0.100403	-6.19132	5.96639e-10	4.51434e-09
Coro2b	51.0674	-2.5223	0.407427	-6.19081	5.98565e-10	4.52661e-09
Gstm5	21.5639	5.03806	0.813946	6.18968	6.02873e-10	4.55688e-09
Spcs2	645.366	-2.16633	0.350285	-6.18447	6.23125e-10	4.70757e-09
Itgb5	46.4594	4.42772	0.716017	6.18382	6.25683e-10	4.72244e-09
Sema4f	81.6875	-2.93332	0.474355	-6.18381	6.25728e-10	4.72244e-09
Rbakdn	1630.44	0.659299	0.106639	6.18252	6.30866e-10	4.75881e-09
Smad7	1588.02	0.88491	0.143199	6.17958	6.42737e-10	4.8459e-09
1810013L24Rik	1241.25	0.789677	0.127846	6.1768	6.54158e-10	4.92951e-09
Ush1g	1715.05	-0.772444	0.125071	-6.17606	6.57191e-10	4.94987e-09
Ptpn12	3431.25	0.617607	0.100036	6.17387	6.66394e-10	5.01665e-09
Cluap1	473.713	-0.940401	0.152355	-6.17243	6.72474e-10	5.05986e-09
Ndufaf4	138.256	-1.32021	0.213985	-6.16963	6.84514e-10	5.14785e-09
Dnase1l1	224.785	1.07265	0.173903	6.1681	6.91162e-10	5.19522e-09
Srl	3302.19	1.12399	0.182246	6.16744	6.94049e-10	5.21429e-09
Tssk2	409.762	-0.81784	0.132651	-6.16535	7.03294e-10	5.28109e-09
Pgm5	1065.44	0.888672	0.144218	6.162	7.1831e-10	5.39113e-09
H2-Ab1	1349.74	4.43852	0.720634	6.1592	7.31145e-10	5.48469e-09
Rbms2	1302.32	-0.859312	0.139602	-6.15546	7.48615e-10	5.61292e-09
Herc3	3090.01	1.00825	0.163823	6.1545	7.53148e-10	5.64406e-09
Pold4	1071.91	-0.977689	0.158866	-6.15416	7.54769e-10	5.65336e-09
Cyb561a3	813.526	1.05209	0.171028	6.15157	7.67199e-10	5.74297e-09
Slc38a7	64.7979	5.5625	0.904251	6.15151	7.67502e-10	5.74297e-09
Pigg	401.894	1.62395	0.264024	6.15077	7.71073e-10	5.76679e-09
Rcor1	601.022	-0.726548	0.118125	-6.15065	7.71674e-10	5.76839e-09
Chml	363.816	-1.26813	0.206223	-6.14933	7.78112e-10	5.8136e-09
Camk1d	1596.33	0.753625	0.122561	6.14897	7.79865e-10	5.82378e-09
Sdk2	1751.19	-0.69836	0.1136	-6.14751	7.87071e-10	5.87464e-09
Zfp317	55.251	2.1794	0.354605	6.146	7.94596e-10	5.92784e-09
Rpa1	581.741	0.836343	0.136133	6.14359	8.0676e-10	6.01557e-09
Atxn7l3b	2727.68	0.489004	0.0796596	6.13867	8.3214e-10	6.20171e-09
[truncated: 22,061 more rows]

## Sheet: TALL-JAK3HOXA9_vs_JAK3.DESeq2.c
	baseMean	log2FoldChange	lfcSE	stat	pvalue	padj
Rpl17	11665.6	10.3877	0.260161	39.9278	0	0
Srrm2	17995.1	8.83764	0.206483	42.8008	0	0
Tubb5	7253.28	8.0043	0.2069	38.6868	0	0
Rps7	12936.8	6.70999	0.169333	39.6259	0	0
Rps20	10024.2	6.61623	0.151162	43.769	0	0
Supt5	3383.65	6.12189	0.156713	39.0644	0	0
Msra	12624.9	-5.57513	0.121632	-45.8361	0	0
Rbm4	4471.49	-8.09741	0.215319	-37.6065	0	0
Rps3	29032.5	4.86412	0.130747	37.2026	6.19047e-303	1.10087e-299
Pdia3	3654.84	5.19669	0.140707	36.9326	1.38343e-298	2.21419e-295
Rpl35	3051.09	7.12684	0.193939	36.7478	1.25972e-295	1.8329e-292
Msn	11221.6	5.92971	0.162548	36.4797	2.32509e-291	3.10109e-288
Pabpc1	15278.5	10.3026	0.282692	36.4445	8.39274e-291	1.03328e-287
Srsf6	5159.2	5.59129	0.154522	36.1844	1.07248e-286	1.22607e-283
Tpt1	25822.1	8.90258	0.251117	35.4519	2.70725e-275	2.88864e-272
Tram2	2418.61	-6.00283	0.170681	-35.1698	5.78573e-271	5.78754e-268
Prrg2	5125.33	-7.51552	0.214972	-34.9605	8.97352e-268	8.44831e-265
Stk4	4103.82	5.12432	0.147899	34.6474	4.8932e-263	4.35087e-260
Satb1	7379.18	4.03476	0.1165	34.6331	8.01399e-263	6.75073e-260
Trim3	2302.35	-4.3683	0.126657	-34.4893	1.16029e-260	9.28526e-258
Tpmt	2811.61	-8.33626	0.243094	-34.2923	1.02316e-257	7.79796e-255
Psme2b	2171.74	-5.23514	0.153008	-34.2148	1.45463e-256	1.05824e-253
Ptpn3	4960.28	-9.37965	0.275613	-34.0319	7.50917e-254	5.2254e-251
Ptprc	26025.5	5.06073	0.148898	33.9878	3.37464e-253	2.25046e-250
Mbnl3	11696.3	-5.18679	0.153179	-33.8609	2.51168e-251	1.60798e-248
Sema4g	4701.25	-8.83243	0.261934	-33.7201	2.93561e-249	1.8071e-246
Sbf1	4702.96	5.12934	0.155779	32.927	9.02795e-238	5.35157e-235
Prrc2b	4684.92	3.93657	0.119594	32.916	1.29844e-237	7.42195e-235
Prex1	5734.64	3.56949	0.108828	32.7993	6.01749e-236	3.32103e-233
N4bp1	2966.51	6.26822	0.191449	32.741	4.08018e-235	2.17678e-232
Numbl	4516.74	-6.73731	0.206106	-32.6886	2.2711e-234	1.17255e-231
Plekha4	1769.06	-7.38228	0.226085	-32.6527	7.32938e-234	3.66584e-231
Rps2	9490.68	11.0957	0.342012	32.4423	6.95453e-231	3.37295e-228
Rpl23a	10083.3	3.8968	0.120259	32.4035	2.45181e-230	1.15416e-227
Pak4	2914.05	-4.53864	0.1405	-32.3036	6.22968e-229	2.84874e-226
Ms4a4d	13332.1	-11.6867	0.363761	-32.1273	1.83099e-226	8.14029e-224
Mkrn2	4546.86	-4.10722	0.128074	-32.0691	1.18852e-225	5.14116e-223
Sidt1	4311.24	5.49709	0.17267	31.8359	2.06379e-222	8.69234e-220
Rassf7	3520.45	-5.62552	0.177167	-31.7526	2.91927e-221	1.19802e-218
Pif1	1442.22	-5.80504	0.183977	-31.5531	1.62467e-218	6.50072e-216
Raly	3094.25	4.84699	0.153734	31.5283	3.553e-218	1.38697e-215
Mbnl1	9172.24	10.0605	0.320788	31.3619	6.69801e-216	2.55242e-213
Ms4a6d	6190.26	-5.08093	0.162994	-31.1726	2.50955e-213	9.34076e-211
Srsf4	2688.12	-3.7976	0.122095	-31.1037	2.14608e-212	7.80635e-210
Pafah1b3	2614.17	-5.69495	0.18353	-31.0301	2.11786e-211	7.53252e-209
Nkiras2	5236.54	-5.9633	0.193851	-30.7623	8.37381e-208	2.91354e-205
Rcsd1	2866.42	7.66511	0.249264	30.751	1.18473e-207	4.03439e-205
Rac1	1961.46	5.18796	0.168882	30.7194	3.13449e-207	1.04516e-204
Rasal1	5645.78	-5.41276	0.17623	-30.7142	3.68288e-207	1.20295e-204
Pdia5	3933.56	-8.8485	0.289099	-30.6072	9.82446e-206	3.14481e-203
Wnk3	5506.91	-10.7395	0.352381	-30.477	5.25015e-204	1.64762e-201
Tmtc2	20948.3	-13.4891	0.443652	-30.4047	4.75679e-203	1.46409e-200
Pcolce	1905.99	-7.56805	0.251696	-30.0682	1.2611e-198	3.80829e-196
Ppp1r13l	1238.63	-6.37535	0.212542	-29.9957	1.11626e-197	3.30848e-195
Xrn2	3406.04	6.33281	0.211462	29.9477	4.70872e-197	1.37024e-194
Ybx1	2491.73	4.11919	0.138182	29.8099	2.90577e-195	8.30478e-193
Zc3h12b	2577.06	-9.12037	0.306093	-29.796	4.3976e-195	1.2348e-192
Vash1	2615.43	-8.96568	0.303034	-29.5864	2.23573e-192	6.16945e-190
Pdcd6ip	3659.32	4.67668	0.158101	29.5803	2.68056e-192	7.2716e-190
Ugcg	2775.29	7.8351	0.264931	29.5741	3.21673e-192	8.58063e-190
Usp48	3712.17	5.65486	0.191435	29.5394	8.99752e-192	2.36074e-189
Serac1	3447.96	-5.46752	0.185358	-29.497	3.14513e-191	8.11899e-189
Tal1	6981.52	-10.2323	0.347641	-29.4334	2.0529e-190	5.21533e-188
Tagln2	5344.45	5.15761	0.175321	29.4181	3.22541e-190	8.06605e-188
Npm1	8943.14	11.1799	0.381984	29.2679	2.66069e-188	6.55145e-186
Stam	2645.63	-3.56924	0.12208	-29.2368	6.60572e-188	1.60189e-185
Zfp873	3167.59	-6.23935	0.214181	-29.1312	1.44488e-186	3.45154e-184
Sh3d19	1665.31	-6.48444	0.222746	-29.1113	2.57944e-186	6.07116e-184
Zpr1	1099.23	6.29427	0.217456	28.9451	3.23441e-184	7.50242e-182
Ranbp3l	3046.9	-9.62493	0.333284	-28.8791	2.18663e-183	4.99957e-181
Sag	1326.37	-6.47329	0.224417	-28.8449	5.86254e-183	1.32155e-180
Nap1l1	1819.72	7.74527	0.269124	28.7796	3.86478e-182	8.59109e-180
Pcbp4	2649.22	-5.12032	0.178145	-28.7425	1.1253e-181	2.46717e-179
Rasgrp2	3029.96	9.28358	0.324932	28.5708	1.54964e-179	3.35162e-177
Ralgps1	1638.76	-4.50751	0.158008	-28.5271	5.40638e-179	1.15372e-176
Zfp292	1383.54	6.36311	0.223059	28.5265	5.49005e-179	1.15616e-176
Pianp	1815.03	-7.5269	0.264493	-28.4579	3.8926e-178	8.09105e-176
Mast3	3218.25	6.62287	0.233304	28.3873	2.89962e-177	5.9498e-175
Traip	1200.91	-4.62019	0.163183	-28.3129	2.39872e-176	4.85968e-174
Yy2	2596.19	-4.93315	0.174334	-28.297	3.76013e-176	7.5226e-174
Ppic	2963.37	-8.6723	0.308661	-28.0966	1.07936e-173	2.13274e-171
Vcp	1172	6.80383	0.242304	28.0797	1.73534e-173	3.38709e-171
Plcg1	3073.81	8.52028	0.305392	27.8995	2.70421e-171	5.21457e-169
Setx	2806.96	3.28939	0.117963	27.885	4.05608e-171	7.72827e-169
Rbm42	1102	5.919	0.212818	27.8124	3.06799e-170	5.77684e-168
Thy1	10351.7	7.05846	0.254212	27.766	1.11617e-169	2.07724e-167
Mbp	2510.46	7.94037	0.287031	27.6638	1.90195e-168	3.49892e-166
Rps28	4207.14	4.033	0.147727	27.3004	4.19559e-164	7.63073e-162
Srrm1	2547.58	5.29859	0.194741	27.2084	5.16525e-163	9.28874e-161
Nfia	846.208	-4.94048	0.181619	-27.2024	6.08111e-163	1.08142e-160
Rac3	2043.44	-8.10093	0.29821	-27.1652	1.67571e-162	2.94723e-160
Stag2	1677.74	7.74698	0.28549	27.1357	3.73199e-162	6.49244e-160
Rpl10a	5653.75	3.75041	0.138222	27.1332	3.99298e-162	6.87179e-160
Nebl	5479.89	-9.16699	0.337931	-27.1268	4.75211e-162	8.09123e-160
Usp7	2774.53	5.0759	0.187186	27.117	6.2151e-162	1.04708e-159
Rps8	7774.25	9.9185	0.366606	27.0549	3.34029e-161	5.56889e-159
Nit2	2591.3	-4.29696	0.159759	-26.8966	2.40932e-159	3.97538e-157
Rangrf	800.445	-4.86708	0.182179	-26.7159	3.0778e-157	5.02656e-155
Snx5	3086.45	4.34776	0.162775	26.7103	3.57062e-157	5.7725e-155
S1pr3	4822.49	-9.36731	0.351346	-26.6612	1.32656e-156	2.12317e-154
Zfp101	1597.52	-4.90906	0.184426	-26.6181	4.19343e-156	6.64514e-154
2017-09-03	1345.22	-7.91833	0.297586	-26.6085	5.41008e-156	8.48905e-154
Nutf2	887.364	-5.54278	0.208624	-26.5683	1.57675e-155	2.45009e-153
Uevld	4862.87	-6.91155	0.260557	-26.5261	4.85112e-155	7.46559e-153
Ypel1	1682.48	-5.05039	0.190443	-26.5192	5.82247e-155	8.8751e-153
Mybl2	2404.65	-5.49458	0.208689	-26.3291	8.91574e-153	1.34619e-150
Nfe2l3	1264.1	-7.87227	0.299158	-26.3147	1.30105e-152	1.9461e-150
Nbeal2	8216.69	8.66266	0.329764	26.2693	4.30796e-152	6.38416e-150
Pcbp3	2163.81	-7.79707	0.297447	-26.2133	1.87431e-151	2.75214e-149
Rd3	2482.3	-8.58707	0.328027	-26.1779	4.73892e-151	6.89513e-149
Rpl14-ps1	10666.6	-12.2714	0.468945	-26.1681	6.13079e-151	8.83994e-149
Rps16	8840.51	12.106	0.463782	26.1028	3.38796e-150	4.84145e-148
Mlst8	5070.69	-4.15158	0.159435	-26.0393	1.77997e-149	2.5211e-147
Znfx1	873.407	5.89305	0.226529	26.0145	3.39229e-149	4.7626e-147
Siglec1	3183.27	-10.0168	0.386554	-25.9131	4.73716e-148	6.59289e-146
Wdr35	932.804	-5.98041	0.230925	-25.8977	7.07429e-148	9.76069e-146
Sf3a1	1608.73	5.52617	0.2136	25.8716	1.39001e-147	1.90147e-145
Zfp36l2	16704.8	5.80659	0.224581	25.8552	2.12484e-147	2.88204e-145
Rps15a-ps6	4956.9	-10.9894	0.426364	-25.7747	1.70459e-146	2.29261e-144
Rsl1d1	1704.66	7.72027	0.300318	25.707	9.76677e-146	1.30264e-143
Ssbp2	1813.82	-3.08902	0.120192	-25.7007	1.14654e-145	1.51655e-143
Supt7l	2541.12	-4.04458	0.157646	-25.6561	3.61191e-145	4.73841e-143
Zc3h8	1655.63	-3.67141	0.14334	-25.6133	1.08379e-144	1.41024e-142
Zfp248	1164.15	-6.08123	0.237667	-25.5872	2.11807e-144	2.73385e-142
Plcb4	1597.47	-8.33093	0.326381	-25.5251	1.0368e-143	1.32752e-141
Mastl	2270.51	-6.71083	0.263393	-25.4784	3.42317e-143	4.34825e-141
Mterf1b	1172.47	-6.59445	0.259251	-25.4365	9.95684e-143	1.2548e-140
Psmc3ip	776.125	-5.13485	0.202191	-25.3961	2.78625e-142	3.4839e-140
Trim34b	1067.81	-7.58169	0.298788	-25.3748	4.78921e-142	5.94196e-140
Slc6a8	1193.37	-7.43651	0.293179	-25.3651	6.13157e-142	7.5489e-140
Xpo6	2275.94	2.93155	0.115636	25.3515	8.6608e-142	1.05814e-139
Vdac2	1287.3	4.36669	0.172262	25.3492	9.17221e-142	1.11213e-139
Ppp4r1l-ps	1188.99	-3.98917	0.15742	-25.341	1.13002e-141	1.35984e-139
Rabl6	1033.25	5.71356	0.225528	25.3341	1.34518e-141	1.60669e-139
Ogt	3129.26	4.79174	0.189292	25.3141	2.23656e-141	2.65157e-139
Papolg	2898.19	-2.8581	0.113109	-25.2686	7.07545e-141	8.32666e-139
Setmar	688.439	-5.23631	0.207295	-25.2602	8.74166e-141	1.02124e-138
Rnf114	1833.53	5.35169	0.211878	25.2583	9.1793e-141	1.0646e-138
Vps13a	1399.13	7.91882	0.313869	25.2297	1.89162e-140	2.17809e-138
Son	5462.24	10.5972	0.42064	25.1931	4.77357e-140	5.45721e-138
Samhd1	5690.79	4.48689	0.178298	25.1651	9.65215e-140	1.09562e-137
Wdr37	689.967	4.51263	0.179611	25.1244	2.69077e-139	3.0328e-137
Tmem259	1987.39	4.60658	0.18338	25.1204	2.98027e-139	3.33561e-137
Tmsb15b1	1868.4	-8.80672	0.350955	-25.0936	5.83816e-139	6.48887e-137
Spdl1	1392.72	-5.29434	0.211062	-25.0842	7.38986e-139	8.15688e-137
2017-09-05	3100.99	7.40582	0.295285	25.0803	8.1651e-139	8.95085e-137
Myh9	18256.1	13.7383	0.547974	25.0712	1.02593e-138	1.117e-136
Wwp2	833.419	4.01664	0.160282	25.0599	1.36299e-138	1.47396e-136
Pabpc1l	1440.33	-6.6888	0.267051	-25.0469	1.8857e-138	2.02555e-136
Ptbp1	4888.67	8.89014	0.355447	25.0111	4.62426e-138	4.93409e-136
Pde2a	8671.95	3.93803	0.157697	24.9721	1.22862e-137	1.30225e-135
Zfp106	1789.03	3.97711	0.15928	24.9693	1.31724e-137	1.38701e-135
Nup210l	1046.13	-4.49884	0.18037	-24.9423	2.58677e-137	2.70597e-135
Trat1	1737.77	-7.42627	0.298669	-24.8645	1.801e-136	1.87176e-134
Pkm	4796.94	5.82143	0.23434	24.8418	3.17443e-136	3.27786e-134
Shisa7	10335.2	-12.8995	0.520863	-24.7657	2.10289e-135	2.15748e-133
Morn1	1147	-7.64031	0.308804	-24.7416	3.81409e-135	3.88819e-133
Pan2	924.919	4.42435	0.179138	24.698	1.1225e-134	1.13706e-132
Rnf44	2361.27	2.85076	0.115517	24.6781	1.83652e-134	1.84865e-132
Ppm1g	2169.2	7.46553	0.302729	24.6607	2.82365e-134	2.82454e-132
Ttyh3	1513.99	8.52541	0.346261	24.6213	7.47282e-134	7.42873e-132
Pfn2	2215.38	-7.99086	0.325	-24.5872	1.73009e-133	1.70926e-131
Npc1	1025.78	6.45561	0.26268	24.5759	2.28636e-133	2.24498e-131
Wwp1	825.302	5.9475	0.242772	24.4983	1.54035e-132	1.50325e-130
Rap1gds1	1122.19	5.7584	0.235235	24.4793	2.45254e-132	2.37896e-130
Trp53rk	6700.3	-8.38588	0.342726	-24.4682	3.2244e-132	3.10883e-130
Sgpp2	1195.33	-8.17391	0.334572	-24.431	8.0197e-132	7.68594e-130
Nbn	7650.41	-4.73383	0.193844	-24.4208	1.02751e-131	9.7889e-130
Rin3	1376.26	6.36766	0.260869	24.4095	1.35686e-131	1.285e-129
Snx21	734.882	-5.56159	0.227931	-24.4003	1.69751e-131	1.59815e-129
Stmn1	5873.21	-5.28784	0.216985	-24.3697	3.58812e-131	3.35836e-129
Sirt7	1427.19	4.63551	0.19045	24.3398	7.44118e-131	6.9242e-129
Trappc2	632.451	-4.64239	0.190989	-24.3072	1.64635e-130	1.52311e-128
Pdzk1	949.406	-4.07684	0.16792	-24.2784	3.31264e-130	3.04706e-128
Tyms	1432.03	-3.67626	0.151602	-24.2495	6.70105e-130	6.12859e-128
Uba1	4310.24	3.82703	0.157868	24.242	8.02874e-130	7.30114e-128
Ubtf	2344.78	4.71878	0.194684	24.2382	8.80693e-130	7.96355e-128
Pik3r3	3406.61	-6.91234	0.285324	-24.2263	1.1753e-129	1.05678e-127
Rpa3	1958.12	-4.66118	0.19265	-24.1951	2.50567e-129	2.24041e-127
Stk3	2038.54	-5.88504	0.243348	-24.1836	3.30982e-129	2.94298e-127
Tma16	2872.59	-4.97042	0.205965	-24.1323	1.14504e-128	1.01251e-126
Naa50	1015.81	3.67902	0.152903	24.0611	6.3907e-128	5.61996e-126
Ptpn7	1292.13	7.58144	0.315261	24.0481	8.73972e-128	7.64367e-126
Tle6	1359.02	-7.26845	0.302326	-24.0417	1.01886e-127	8.86239e-126
Plek2	5586.02	-11.8638	0.493481	-24.0411	1.03383e-127	8.94406e-126
Zdhhc2	1623.15	-7.02727	0.292773	-24.0025	2.61921e-127	2.25378e-125
Srl	2059.58	-9.11671	0.380445	-23.9633	6.71995e-127	5.75149e-125
Selplg	7562.84	5.06071	0.211402	23.9388	1.20823e-126	1.02861e-124
Papd5	962.648	6.02655	0.251786	23.9352	1.31918e-126	1.11711e-124
Myo1h	3893.29	-8.58591	0.358891	-23.9234	1.74678e-126	1.47143e-124
Pcbp2	3697.92	5.71075	0.238783	23.9161	2.08353e-126	1.74591e-124
Rasal3	6908.16	5.86143	0.245192	23.9054	2.68959e-126	2.24203e-124
Rusc2	1524	-8.68677	0.363555	-23.894	3.5352e-126	2.93165e-124
Otud5	2065.7	5.17687	0.216782	23.8806	4.87255e-126	4.01986e-124
Neurl4	1014.55	6.48469	0.27168	23.8688	6.45829e-126	5.30077e-124
Ppp1r13b	1090.52	3.36053	0.140855	23.8581	8.33463e-126	6.80591e-124
Pacs2	1327.51	4.89078	0.205081	23.8481	1.06021e-125	8.61354e-124
Trip13	910.868	-4.65488	0.195245	-23.8413	1.24797e-125	1.00877e-123
Tbc1d2b	1465.75	4.60835	0.193748	23.7853	4.74546e-125	3.81664e-123
Mdfic	1196.51	-3.45142	0.145126	-23.7822	5.10356e-125	4.08412e-123
Pnisr	1536.07	4.38525	0.184413	23.7795	5.44793e-125	4.33802e-123
Usp27x	1908.07	-8.03393	0.338466	-23.7363	1.52226e-124	1.20613e-122
Rnf141	754.443	-4.65883	0.196539	-23.7043	3.25397e-124	2.5655e-122
Spsb3	549.458	4.64793	0.196494	23.6543	1.06707e-123	8.37182e-122
Rpl10	6155.96	5.37964	0.22839	23.5546	1.1259e-122	8.79029e-121
Tmem231	991.654	-6.75903	0.287157	-23.5378	1.67453e-122	1.30101e-120
Ninj2	3002.07	-10.5743	0.449357	-23.532	1.92133e-122	1.48555e-120
Prkar2a	6376.43	-3.50654	0.149206	-23.5014	3.94488e-122	3.03547e-120
Phf12	1834.88	3.50326	0.149255	23.4716	7.95021e-122	6.08818e-120
Psmc5	795.736	4.54118	0.193481	23.4709	8.08369e-122	6.16092e-120
Mthfd2l	791.997	-6.20056	0.264202	-23.4691	8.44381e-122	6.40489e-120
Txn1	981.031	7.37478	0.31478	23.4283	2.19791e-121	1.65932e-119
Ppp1ca	4088.79	3.18161	0.135812	23.4266	2.29185e-121	1.72212e-119
Serinc5	10032.4	-6.8833	0.294033	-23.4099	3.38702e-121	2.53314e-119
Unc13d	2231.26	7.6881	0.328657	23.3925	5.09501e-121	3.79282e-119
Slc35e3	1340.99	-4.1565	0.177796	-23.3779	7.16616e-121	5.30992e-119
Serp1	1633.3	5.86098	0.25074	23.3747	7.73243e-121	5.70312e-119
Sorbs2	5862.42	-12.0885	0.517242	-23.371	8.43292e-121	6.19123e-119
Ncl	12175.2	4.81774	0.206847	23.2913	5.42629e-120	3.96565e-118
Ttc16	1033.76	-6.25005	0.268398	-23.2865	6.07079e-120	4.4165e-118
Nus1	884.86	7.16435	0.307759	23.2791	7.21874e-120	5.22787e-118
Pdcd4	4256.1	4.00171	0.172104	23.2517	1.36882e-119	9.86849e-118
Smc1a	2011.46	4.98503	0.214903	23.1966	4.92423e-119	3.53418e-117
Sema4a	4822.12	10.4117	0.448855	23.1962	4.9758e-119	3.55525e-117
Sbno1	1767.28	8.83508	0.381765	23.1428	1.71961e-118	1.22322e-116
Myl10	16429.1	-8.20236	0.354461	-23.1404	1.81728e-118	1.28697e-116
Rnf123	2352.88	3.36897	0.145619	23.1356	2.03225e-118	1.43287e-116
Otud6b	1841.28	-3.14988	0.136152	-23.135	2.06078e-118	1.44661e-116
Pole2	1216.68	-2.80375	0.121211	-23.1311	2.25165e-118	1.57369e-116
Ttc8	2474.67	-7.75892	0.336163	-23.0808	7.21963e-118	5.02392e-116
Ncmap	7083.86	-12.5366	0.543972	-23.0465	1.59566e-117	1.10556e-115
Slc25a14	730.888	-4.06468	0.176394	-23.0432	1.72254e-117	1.18833e-115
Tmem63a	1180.04	3.38632	0.146959	23.0426	1.744e-117	1.19797e-115
Sp6	1573.41	-6.40083	0.278703	-22.9665	1.00835e-116	6.89683e-115
Psd4	3233.66	6.22506	0.271144	22.9585	1.21264e-116	8.25884e-115
Ube2cbp	1564.55	-4.89715	0.213338	-22.9549	1.31646e-116	8.92793e-115
Rpl37a	6067.61	3.77623	0.164513	22.9541	1.34132e-116	9.05817e-115
Zfp708	822.037	-4.94716	0.215681	-22.9374	1.96737e-116	1.32302e-114
Zfp213	2548.72	-3.97687	0.173712	-22.8935	5.39349e-116	3.61184e-114
Slc39a7	1409.53	8.84902	0.387396	22.8423	1.74306e-115	1.16241e-113
Rps27	1947.41	-4.31559	0.189174	-22.8128	3.4221e-115	2.27264e-113
Rpl30	929.583	-5.4566	0.239353	-22.7973	4.87395e-115	3.22345e-113
Pfn1	10147	6.50416	0.285392	22.7902	5.72905e-115	3.77339e-113
Ms4a6b	4288.27	7.86513	0.345378	22.7725	8.5814e-115	5.62891e-113
Ptpdc1	1884.03	-6.82174	0.299735	-22.7592	1.1623e-114	7.59291e-113
Txlnb	2884.91	-8.5407	0.375348	-22.7541	1.3082e-114	8.51131e-113
Rps15a-ps4	4162.51	-11.2894	0.497462	-22.694	5.13311e-114	3.32613e-112
Rpusd1	1296.66	-3.9241	0.173056	-22.6753	7.85713e-114	5.0707e-112
Prrg1	6341.69	-8.76206	0.386693	-22.6589	1.13876e-113	7.31963e-112
Slc16a11	814.066	-7.27982	0.321362	-22.653	1.30384e-113	8.3472e-112
Rilp	1446.72	-8.60812	0.380247	-22.6382	1.82206e-113	1.16183e-111
Mtrf1	3025.63	-6.4296	0.284324	-22.6136	3.18586e-113	2.0234e-111
Slc25a5	2217.96	8.63443	0.381917	22.6081	3.60581e-113	2.28107e-111
Trpv2	1008.39	5.37739	0.23786	22.6074	3.66346e-113	2.30581e-111
Prelid2	1064.98	-4.67148	0.206636	-22.6073	3.67374e-113	2.30581e-111
Sema3b	1618.11	-9.37489	0.415482	-22.5639	9.80894e-113	6.1325e-111
Rhobtb1	2536.62	-10.5896	0.469715	-22.5447	1.5153e-112	9.43673e-111
Srsf9	2911.67	-3.16113	0.140379	-22.5186	2.72996e-112	1.69352e-110
Ptger3	1000.67	-5.26741	0.234156	-22.4952	4.62049e-112	2.85525e-110
Scaf1	1107.01	7.91262	0.351771	22.4937	4.78562e-112	2.94592e-110
Txnrd3	1160.75	-4.68294	0.208196	-22.4929	4.87061e-112	2.98675e-110
Pcnxl2	1279.66	-7.71926	0.344609	-22.4001	3.93018e-111	2.40086e-109
Synpo	720.549	-7.32615	0.327137	-22.3948	4.4257e-111	2.69329e-109
Tpx2	12237.6	-6.66126	0.297633	-22.3808	6.05034e-111	3.66802e-109
Ubald2	791.908	-6.4857	0.290052	-22.3605	9.54968e-111	5.76765e-109
Snx7	1913.54	-9.61205	0.42996	-22.3557	1.06259e-110	6.39353e-109
Xrra1	962.995	-7.13691	0.319718	-22.3225	2.23542e-110	1.34e-108
Nr1h3	743.077	-6.05974	0.271734	-22.3003	3.67025e-110	2.19188e-108
Nsun4	1523.64	-3.46568	0.155427	-22.2978	3.88382e-110	2.3108e-108
Rbl2	1088.39	4.32457	0.193954	22.2969	3.95954e-110	2.34713e-108
Selt	1259.94	6.9932	0.313655	22.2959	4.05275e-110	2.39352e-108
Prkar1a	4626.53	10.9436	0.490946	22.2908	4.5428e-110	2.67307e-108
Sec14l2	583.744	-6.78737	0.30452	-22.2887	4.75443e-110	2.78735e-108
Pkn3	2498.94	-6.9304	0.311011	-22.2835	5.34467e-110	3.12195e-108
Taok1	1366.16	3.39333	0.152363	22.2714	6.9966e-110	4.07202e-108
Zmiz2	2335.13	3.64755	0.163849	22.2616	8.71142e-110	5.05168e-108
Qpctl	1079.81	-2.99795	0.134719	-22.2534	1.04648e-109	6.04655e-108
Usp35	725.623	-4.07049	0.182937	-22.2508	1.10862e-109	6.38254e-108
Mgea5	3097.96	4.24169	0.191115	22.1945	3.88491e-109	2.2286e-107
Rhoa	2615.64	3.24436	0.146373	22.1651	7.46399e-109	4.26647e-107
Tulp2	2364.93	-10.2374	0.4621	-22.1542	9.50854e-109	5.41581e-107
R74862	668.471	-7.07142	0.320277	-22.079	5.02654e-108	2.85283e-106
Trap1	1325.53	5.32111	0.241065	22.0734	5.69807e-108	3.22253e-106
Slc18a2	1058.77	-4.83502	0.21933	-22.0445	1.0775e-107	6.0723e-106
Nrd1	1485.02	8.98882	0.407815	22.0414	1.15389e-107	6.48e-106
Pafah2	1052.34	-4.52413	0.205291	-22.0376	1.2557e-107	7.02708e-106
Ncs1	1231.12	-8.49752	0.385887	-22.0207	1.8227e-107	1.01646e-105
Ptpn11	1172.34	3.67554	0.167031	22.0052	2.56905e-107	1.4277e-105
Stk25	1114.17	3.31683	0.150736	22.0043	2.61881e-107	1.45032e-105
Rps17	3444.82	11.0198	0.501458	21.9756	4.934e-107	2.72305e-105
Ube2j2	977.907	-3.72522	0.169601	-21.9646	6.28165e-107	3.45491e-105
Slc25a3	3882.4	3.94621	0.179709	21.9588	7.129e-107	3.90752e-105
Vim	14825	13.8704	0.631687	21.9578	7.29844e-107	3.98674e-105
Pyroxd2	1784.37	-5.40241	0.246056	-21.956	7.58246e-107	4.1278e-105
Setbp1	649.708	6.74892	0.307391	21.9555	7.67326e-107	4.16307e-105
Pdss1	1670.95	-5.20144	0.237507	-21.9002	2.5871e-106	1.39887e-104
Rac2	13769.2	4.03301	0.184202	21.8945	2.92823e-106	1.57799e-104
Naa20	1343.83	-3.17085	0.145293	-21.8239	1.3767e-105	7.39401e-104
Ptma	4243.61	11.4584	0.525494	21.805	2.07931e-105	1.11302e-103
Nt5dc2	592.256	-5.02173	0.231143	-21.7257	1.17343e-104	6.26023e-103
Tpm4	1521.02	9.45477	0.435315	21.7194	1.34589e-104	7.15648e-103
Prkag2os1	968.51	-8.23329	0.379174	-21.7138	1.52085e-104	8.06e-103
Pag1	1679.32	4.49916	0.207863	21.6448	6.79855e-104	3.59111e-102
Psme2	1936.8	3.50728	0.162164	21.628	9.79741e-104	5.15814e-102
Tagap	2200.47	4.05172	0.187402	21.6205	1.15293e-103	6.05002e-102
Matn1	1187.45	-8.195	0.379073	-21.6186	1.20183e-103	6.28605e-102
Zmynd15	1589.42	-9.66815	0.448341	-21.5643	3.89081e-103	2.02842e-101
Npff	892.017	-4.46593	0.207297	-21.5436	6.07936e-103	3.1591e-101
Psen2	3533.64	-2.89367	0.134378	-21.5339	7.50139e-103	3.88543e-101
Ube2z	1098.97	2.94145	0.136667	21.5228	9.53051e-103	4.92051e-101
Tmem132b	1120.99	-8.68013	0.403526	-21.5107	1.23626e-102	6.36219e-101
Tbx21	1136.77	7.86604	0.365913	21.497	1.65926e-102	8.51168e-101
Tmem126a	2280.05	-3.9524	0.184056	-21.4739	2.73054e-102	1.39624e-100
Trpv4	993.689	-7.50389	0.349795	-21.4523	4.3494e-102	2.21695e-100
S100a10	1772.26	5.81049	0.27091	21.448	4.76388e-102	2.42051e-100
Mgarp	1605.97	-9.80673	0.457293	-21.4452	5.06517e-102	2.56544e-100
Sh2d2a	4449.6	8.6458	0.403249	21.4404	5.61628e-102	2.82669e-100
Rdx	1000.22	7.57217	0.353172	21.4404	5.60734e-102	2.82669e-100
Mrpl9	963.35	3.32372	0.155068	21.4339	6.44901e-102	3.23562e-100
Ptpla	1731.68	-9.57265	0.446881	-21.421	8.50633e-102	4.25449e-100
Pbx4	632.921	-4.81541	0.224922	-21.4093	1.09542e-101	5.46174e-100
Senp8	1172.82	-5.81245	0.271639	-21.3977	1.40284e-101	6.97282e-100
Stk10	4757.74	3.16574	0.147985	21.3923	1.57427e-101	7.80065e-100
St8sia6	1346.97	-6.97644	0.326137	-21.3911	1.61571e-101	7.98133e-100
Tomm70a	1033.03	7.43056	0.348015	21.3513	3.79344e-101	1.86812e-99
Rps4l	9656.04	-12.2012	0.572337	-21.3181	7.70594e-101	3.78324e-99
Rmdn2	908.772	-5.41063	0.253934	-21.3072	9.73684e-101	4.76569e-99
Snw1	1015.39	3.61268	0.169634	21.2969	1.21294e-100	5.91865e-99
Nt5e	1409.01	6.01194	0.282309	21.2956	1.24728e-100	6.06771e-99
Rap1b	4062.25	8.1135	0.381113	21.289	1.43669e-100	6.96793e-99
Mgll	2895.89	-8.12232	0.381552	-21.2876	1.47919e-100	7.15241e-99
Pde7a	2157.68	10.0535	0.472399	21.2818	1.67445e-100	8.07214e-99
Vars	5284.53	2.76557	0.129962	21.2798	1.74647e-100	8.39405e-99
Pdcd1lg2	706.231	-3.75017	0.176245	-21.2781	1.81097e-100	8.67803e-99
Tsnaxip1	1079.88	-8.89514	0.418382	-21.2608	2.61952e-100	1.25151e-98
Tmem183a	531.352	6.32033	0.297284	21.2603	2.64897e-100	1.26181e-98
Tsc2	769.491	5.70385	0.268416	21.25	3.29558e-100	1.56516e-98
Tcf7	10155.4	2.96679	0.139647	21.2449	3.67454e-100	1.73997e-98
Zfp317	562.689	3.6529	0.172098	21.2257	5.52646e-100	2.60917e-98
Plekhm1	729.295	5.34839	0.251998	21.2239	5.74103e-100	2.7025e-98
Reep4	557.491	4.70079	0.221566	21.2162	6.77298e-100	3.17893e-98
Wscd1	759.431	-7.82236	0.368768	-21.2121	7.37651e-100	3.45208e-98
Zfp229	1111.6	-9.04591	0.426475	-21.2109	7.57763e-100	3.53586e-98
Skor1	1873.4	-10.148	0.478834	-21.1932	1.10351e-99	5.1342e-98
Snrpb	2201.72	2.82834	0.133467	21.1913	1.14795e-99	5.32549e-98
Rpl41	3938.95	11.5453	0.545136	21.1788	1.49899e-99	6.9339e-98
Sf3b4	3264.23	-3.46133	0.163463	-21.1751	1.62091e-99	7.47626e-98
Tom1l1	842.324	-7.01463	0.331599	-21.154	2.53713e-99	1.16686e-97
Peli3	2595.44	-10.9265	0.516733	-21.1454	3.04057e-99	1.3944e-97
Pfkfb3	671.097	5.27054	0.249592	21.1166	5.59946e-99	2.56055e-97
Phf21b	2568.24	-3.49611	0.165817	-21.0841	1.11285e-98	5.07441e-97
Xpo1	1788.63	9.93905	0.471581	21.076	1.31978e-98	6.00086e-97
Upf3a	1900.07	-2.5529	0.121235	-21.0574	1.95449e-98	8.86163e-97
Rtcb	1723.96	9.74549	0.462863	21.0548	2.06687e-98	9.34472e-97
Pbrm1	1118.5	7.87537	0.374222	21.0447	2.55947e-98	1.15393e-96
Oxr1	602.791	4.36167	0.207306	21.0398	2.83621e-98	1.2751e-96
Sun2	6450.69	3.27094	0.1555	21.035	3.13535e-98	1.40564e-96
Tmem68	4598.02	-4.67497	0.222486	-21.0125	5.04229e-98	2.25424e-96
Prkcz	4165.12	-5.69095	0.271087	-20.9931	7.57982e-98	3.37925e-96
Slc24a1	520.372	-6.0596	0.288854	-20.9781	1.03952e-97	4.62152e-96
Tcf3	1676.23	9.58959	0.457536	20.9592	1.54578e-97	6.85326e-96
Ssr1	1026.21	7.13387	0.34063	20.9432	2.16457e-97	9.57015e-96
Rap1gap	737.629	-7.12824	0.340523	-20.9332	2.66928e-97	1.17691e-95
Nfatc1	1625.66	9.4063	0.449775	20.9133	4.04933e-97	1.78048e-95
Rnaset2b	1143.99	-4.81694	0.230409	-20.906	4.71957e-97	2.0695e-95
Psap	7891.13	12.7209	0.608486	20.9058	4.74182e-97	2.07358e-95
Tuba4a	2822.24	8.40166	0.402127	20.8931	6.18919e-97	2.69913e-95
Plch1	2637.66	-10.9424	0.524201	-20.8744	9.15722e-97	3.98265e-95
Zfp449	1547.94	-9.87673	0.47346	-20.8607	1.21792e-96	5.2826e-95
Rhoc	864.665	-4.53686	0.218384	-20.7747	7.33164e-96	3.17143e-94
Mtmr11	960.964	-6.21114	0.29914	-20.7633	9.29759e-96	4.011e-94
Tmc6	3091.3	5.96822	0.287519	20.7577	1.04536e-95	4.4976e-94
Vgf	1401.95	-9.60517	0.463382	-20.7284	1.92054e-95	8.24083e-94
Vezf1	1122.31	7.73292	0.373466	20.7058	3.06842e-95	1.3131e-93
Slain1os	587.076	-4.78734	0.231248	-20.7022	3.30658e-95	1.41125e-93
Rnf113a1	882.902	-4.38757	0.21229	-20.6678	6.74587e-95	2.87148e-93
Wdr12	3705.1	-3.4542	0.167228	-20.6557	8.67696e-95	3.68368e-93
Ncam1	1373.02	-7.57246	0.366966	-20.6353	1.32316e-94	5.60242e-93
Pikfyve	6602.22	-3.74567	0.181541	-20.6326	1.39837e-94	5.90525e-93
Tead2	809.869	-5.59241	0.27112	-20.627	1.57032e-94	6.61395e-93
Trappc8	1714.38	3.20423	0.155344	20.6267	1.58218e-94	6.6464e-93
Mki67	752.394	5.3181	0.257887	20.6218	1.74863e-94	7.3264e-93
Ndnf	471.967	-5.17123	0.25097	-20.605	2.4768e-94	1.03502e-92
Notch2	1292.56	8.40597	0.408395	20.5829	3.90483e-94	1.62752e-92
Uba52	6641.86	3.44345	0.16755	20.5518	7.41077e-94	3.08076e-92
Tubd1	5701.64	-6.23235	0.303506	-20.5345	1.05857e-93	4.38922e-92
Zfp207	1551.34	7.38068	0.359519	20.5293	1.17784e-93	4.87114e-92
Mtfp1	537.939	-4.23583	0.206426	-20.5198	1.43269e-93	5.90984e-92
Rae1	798.393	4.819	0.235135	20.4946	2.40648e-93	9.90121e-92
Supt3	1276.59	-3.85893	0.1885	-20.4718	3.84476e-93	1.57783e-91
Whsc1l1	3757.97	5.84499	0.286227	20.4208	1.09266e-92	4.47263e-91
Tnn	3085.79	-8.5175	0.41727	-20.4125	1.29615e-92	5.29204e-91
Ptp4a3	1262.77	5.72827	0.280785	20.4009	1.64056e-92	6.6812e-91
Slco3a1	1485.32	7.04279	0.345689	20.3732	2.89123e-92	1.17447e-90
Ndc1	1241.54	-3.61281	0.177347	-20.3714	3.00052e-92	1.21578e-90
Pxn	1628.22	6.07675	0.298714	20.343	5.35411e-92	2.16395e-90
Tmem127	1196.13	3.27969	0.161363	20.3249	7.74301e-92	3.12158e-90
Rps19bp1	3123.02	-4.61521	0.227163	-20.3167	9.15445e-92	3.68133e-90
Zfhx2os	1611.7	-9.93593	0.489106	-20.3145	9.57548e-92	3.84099e-90
Rtkn2	790.678	-8.35316	0.411199	-20.3141	9.64079e-92	3.85752e-90
Mcm8	2192.79	-5.64641	0.278015	-20.3097	1.05477e-91	4.20988e-90
Smg1	9694.24	2.63788	0.129933	20.3019	1.23811e-91	4.92934e-90
Vprbp	787.231	7.8336	0.385965	20.2961	1.39169e-91	5.52706e-90
Rabgap1l	1019.18	2.84679	0.140284	20.2931	1.48087e-91	5.86667e-90
Zbtb46	927.269	-6.86496	0.338405	-20.2862	1.7009e-91	6.7217e-90
Smpd3	430.48	-6.48758	0.319933	-20.278	2.0132e-91	7.93629e-90
Srsf3	2778.77	7.63199	0.37639	20.2768	2.06002e-91	8.08409e-90
Tmem216	562.531	-3.37474	0.166434	-20.2768	2.0608e-91	8.08409e-90
Sp140	4702.06	-3.21932	0.159177	-20.2247	5.93022e-91	2.32061e-89
Mllt10	812.15	4.69605	0.232282	20.2171	6.92891e-91	2.70481e-89
Sar1a	1141.09	9.03253	0.446781	20.2169	6.95409e-91	2.70804e-89
Pwp1	513.747	6.23343	0.308371	20.2141	7.36111e-91	2.85958e-89
Rab3il1	851.022	-7.50699	0.37152	-20.2062	8.6385e-91	3.34768e-89
Pabpc4	876.823	6.59803	0.326877	20.1851	1.32425e-90	5.11948e-89
Prdx1	947.988	8.56928	0.424677	20.1784	1.51684e-90	5.84987e-89
Sfmbt2	1236.47	-5.06374	0.251021	-20.1726	1.70575e-90	6.56261e-89
Vwa5b2	663.8	-7.92764	0.393185	-20.1626	2.086e-90	8.00634e-89
Os9	2180.49	4.64625	0.230674	20.1421	3.15931e-90	1.20968e-88
Ranbp9	1322.33	7.88984	0.391739	20.1405	3.25781e-90	1.24442e-88
Rtn4	852.691	7.71721	0.383338	20.1316	3.89937e-90	1.48594e-88
Tmbim6	3626.21	5.02083	0.249666	20.1102	6.01035e-90	2.28493e-88
Rps19-ps3	3829.32	-9.19141	0.457191	-20.1041	6.79545e-90	2.57728e-88
Ptp4a2	3026.13	4.01777	0.199985	20.0903	8.9666e-90	3.39268e-88
Msl3l2	1890.5	-6.1359	0.305677	-20.0732	1.26692e-89	4.78233e-88
Pes1	1019.22	4.7858	0.238619	20.0563	1.77902e-89	6.69957e-88
Rab9	1991.17	-3.7941	0.189186	-20.0549	1.83056e-89	6.87748e-88
Picalm	3233.08	3.47256	0.173206	20.0487	2.07037e-89	7.76025e-88
Zc3hc1	4024.98	-3.8645	0.192776	-20.0465	2.16507e-89	8.09627e-88
Tnk2	1484.13	8.80753	0.43945	20.0422	2.36321e-89	8.81661e-88
Rslcan18	1082.94	-6.86703	0.342794	-20.0325	2.86727e-89	1.06722e-87
Nsf	3618.25	-2.39731	0.119749	-20.0194	3.73044e-89	1.38528e-87
Tarsl2	724.99	-3.05066	0.152396	-20.018	3.84116e-89	1.4231e-87
Rnu11	1277.34	-9.35068	0.467212	-20.0138	4.1768e-89	1.54387e-87
Ppp6r1	5901.1	2.69305	0.13463	20.0033	5.15409e-89	1.90072e-87
Ubash3b	2689.01	-2.8141	0.141177	-19.9332	2.0982e-88	7.71992e-87
Sub1	1761.92	4.18691	0.210223	19.9165	2.9255e-88	1.07391e-86
Pdcl	4322.52	-3.85389	0.193722	-19.894	4.5906e-88	1.68129e-86
Serbp1	5897.38	2.78976	0.140249	19.8916	4.815e-88	1.75945e-86
Ms4a4b	7940.21	10.4992	0.52838	19.8705	7.32227e-88	2.66954e-86
Zfp112	738.862	-5.3463	0.269121	-19.8658	8.05377e-88	2.92956e-86
Qrsl1	1262.44	-2.75564	0.138767	-19.8581	9.38628e-88	3.40652e-86
Mier1	1487.56	3.11787	0.157029	19.8553	9.90753e-88	3.58756e-86
Phtf1os	1288.14	-9.75996	0.49158	-19.8543	1.01241e-87	3.65768e-86
Zbed6	1189.49	4.18262	0.210728	19.8484	1.13789e-87	4.10177e-86
Tlk2	614.075	7.57651	0.381932	19.8374	1.41702e-87	5.09648e-86
Zfp740	1521.54	2.89071	0.145832	19.8222	1.91688e-87	6.87885e-86
Zfp865	545.949	6.62567	0.334471	19.8094	2.47024e-87	8.84479e-86
Slc28a2	1185.27	8.74287	0.44166	19.7955	3.25805e-87	1.16395e-85
Wdr83os	2581.61	-2.94712	0.148912	-19.791	3.55868e-87	1.26852e-85
Rad17	2423.49	-2.95155	0.149182	-19.785	4.01146e-87	1.42674e-85
Tcp11l2	1813.33	5.36253	0.271117	19.7794	4.48365e-87	1.59115e-85
Vav3	2006.58	-3.29721	0.166729	-19.7758	4.80973e-87	1.70309e-85
Tpp1	533.667	5.911	0.298952	19.7724	5.1468e-87	1.81842e-85
Utf1	638.781	-6.22341	0.314949	-19.7601	6.57239e-87	2.31698e-85
Zeb2os	678.555	-7.72239	0.390919	-19.7544	7.34622e-87	2.58409e-85
Slc43a2	611.026	4.59758	0.232843	19.7454	8.78396e-87	3.08305e-85
Scd4	540.472	-6.49467	0.328968	-19.7425	9.29698e-87	3.25598e-85
Snhg12	1093.45	7.73887	0.392185	19.7327	1.12996e-86	3.9487e-85
Rps5	20295.6	14.9409	0.757668	19.7196	1.46525e-86	5.10922e-85
Psmf1	2376.21	-2.37411	0.120568	-19.6911	2.56902e-86	8.93853e-85
Zcchc3	759.17	-7.96395	0.404515	-19.6877	2.7513e-86	9.55196e-85
Phf11a	1475	-4.79723	0.243712	-19.684	2.95482e-86	1.02363e-84
Wdtc1	765.107	6.32458	0.321319	19.6832	3.00565e-86	1.03899e-84
Pim1	6809.44	6.74138	0.342579	19.6783	3.30819e-86	1.14111e-84
Sirt2	600.595	6.47625	0.329588	19.6495	5.83729e-86	2.00916e-84
Sugct	848.615	-8.5453	0.43523	-19.634	7.92152e-86	2.72068e-84
Tial1	1003.2	3.90266	0.198856	19.6256	9.34772e-86	3.20364e-84
Slc12a7	2454.14	7.63519	0.38965	19.595	1.70588e-85	5.82147e-84
Ppp2r5a	2285.31	4.48719	0.228996	19.595	1.70525e-85	5.82147e-84
Tox2	1270.39	-9.45492	0.482646	-19.5898	1.89084e-85	6.43891e-84
Prkrir	1083.43	4.54591	0.232129	19.5835	2.13724e-85	7.26254e-84
Sapcd1	399.363	-6.4238	0.328116	-19.5778	2.3891e-85	8.10117e-84
Rmrp	1537.71	-10.1726	0.519705	-19.5739	2.58385e-85	8.74303e-84
Nup85	515.637	6.97292	0.356316	19.5695	2.81516e-85	9.50562e-84
Upf2	590.745	7.50632	0.383678	19.5641	3.12842e-85	1.05411e-83
Pdxk-ps	509.346	-7.30862	0.374341	-19.524	6.86716e-85	2.30901e-83
Supv3l1	2138.16	-2.81958	0.144459	-19.5182	7.68734e-85	2.57937e-83
Snrnp27	3546.84	-4.28941	0.219774	-19.5174	7.81465e-85	2.6166e-83
Taf6l	656.181	-3.17533	0.162712	-19.515	8.18754e-85	2.73573e-83
Matk	1647.38	-5.08028	0.260602	-19.4944	1.2246e-84	4.08326e-83
Snd1	1490.58	9.67912	0.496643	19.4891	1.35888e-84	4.52161e-83
Yod1	951.615	-3.04907	0.156452	-19.4888	1.36616e-84	4.53638e-83
Nras	757.284	7.87215	0.404169	19.4774	1.7085e-84	5.66139e-83
Zfp647	490.283	-4.59804	0.236288	-19.4594	2.42424e-84	8.01651e-83
Rapgef3	2625.78	-8.41918	0.432786	-19.4534	2.72555e-84	8.99431e-83
Zc2hc1a	433.586	-6.54499	0.336856	-19.4297	4.33295e-84	1.42693e-82
Selo	7766.31	-5.11337	0.26321	-19.427	4.5653e-84	1.50036e-82
Psat1	6366.67	-3.58129	0.184372	-19.4243	4.8093e-84	1.57731e-82
Snrnp70	4135.22	3.51612	0.181165	19.4084	6.55242e-84	2.14461e-82
Zhx3	916.748	-3.30494	0.170312	-19.4053	6.96608e-84	2.27535e-82
Nsg2	4063.33	3.36848	0.173781	19.3835	1.06397e-83	3.46818e-82
Slc25a47	378.457	-5.47867	0.282758	-19.3758	1.23503e-83	4.0176e-82
Slc12a9	4542.3	-3.52259	0.181861	-19.3697	1.39119e-83	4.51642e-82
Ppp1r14b	446.201	5.58634	0.288514	19.3625	1.60038e-83	5.18504e-82
Slc12a8	1610.93	-10.2352	0.528659	-19.3607	1.65467e-83	5.35011e-82
Slc44a4	3752.48	-12.0727	0.623699	-19.3566	1.79223e-83	5.78318e-82
Spop	1383.32	4.57925	0.236749	19.3422	2.37322e-83	7.64252e-82
Sbno2	1327.62	9.37024	0.484531	19.3388	2.5334e-83	8.14197e-82
Plekhg4	645.678	-7.7991	0.403347	-19.336	2.67655e-83	8.58482e-82
Unc13b	842.114	-8.42508	0.436147	-19.3171	3.86056e-83	1.23577e-81
Tbc1d22bos	409.53	-5.70514	0.295476	-19.3083	4.57658e-83	1.46204e-81
Trim8	1142.9	9.29976	0.482041	19.2925	6.21542e-83	1.98163e-81
Zdhhc18	2805.44	3.31063	0.171619	19.2906	6.44441e-83	2.05055e-81
Padi2	1603.35	6.8738	0.356677	19.2718	9.27136e-83	2.94421e-81
Rabac1	1320.53	3.15378	0.16369	19.2668	1.02069e-82	3.23489e-81
Mdm1	1400.27	-3.95643	0.205357	-19.2661	1.03411e-82	3.27093e-81
Rab6b	1817.73	-4.22083	0.219106	-19.2638	1.08094e-82	3.4123e-81
Mn1	845.71	-8.74833	0.454551	-19.2461	1.52284e-82	4.79786e-81
2017-03-07	1321.53	-5.49307	0.285592	-19.234	1.92235e-82	6.04464e-81
Susd2	448.956	-4.3332	0.22546	-19.2194	2.54762e-82	7.99503e-81
Rhog	1099.95	9.08011	0.473203	19.1886	4.60512e-82	1.44237e-80
Snhg10	359.003	-5.91007	0.308074	-19.184	5.0401e-82	1.57552e-80
Sparc	1385.13	-9.84988	0.513643	-19.1765	5.8141e-82	1.81393e-80
Tars2	674.647	7.96714	0.415875	19.1575	8.37925e-82	2.60914e-80
Sec22a	1819.09	-4.94651	0.258225	-19.1558	8.65907e-82	2.69104e-80
Rpl3	15774.6	3.40599	0.177905	19.145	1.06456e-81	3.30201e-80
Prr11	916.132	-4.37481	0.228708	-19.1284	1.46494e-81	4.53508e-80
Rpp21	2094.33	-3.16842	0.165785	-19.1116	2.02175e-81	6.24674e-80
Pcgf1	894.555	-3.43045	0.179654	-19.0948	2.78919e-81	8.60134e-80
Ppp2ca	1639.48	9.93792	0.520642	19.0878	3.18711e-81	9.80955e-80
Zfml	1126.02	7.6715	0.402089	19.0791	3.76568e-81	1.15681e-79
Syngr4	636.511	-7.77837	0.408047	-19.0624	5.17998e-81	1.58823e-79
Piezo1	1854.86	6.39347	0.335444	19.0597	5.45451e-81	1.6692e-79
Syne4	1103.27	-6.87097	0.360791	-19.0442	7.34088e-81	2.24219e-79
Tcf7l2	9149.35	-11.131	0.584949	-19.0289	9.82077e-81	2.99393e-79
Nme2	2855.3	2.75682	0.144972	19.0162	1.25252e-80	3.81114e-79
Zfp109	1717.51	-5.65669	0.297634	-19.0055	1.53531e-80	4.66275e-79
Tmem222	417.858	6.28328	0.330738	18.9978	1.77969e-80	5.39468e-79
Npm2	971.116	-9.35805	0.492959	-18.9834	2.33758e-80	7.07241e-79
Plekhg3	408.107	6.12168	0.322494	18.9823	2.38996e-80	7.21722e-79
Rwdd2a	494.229	-4.81569	0.253826	-18.9724	2.88405e-80	8.69289e-79
Rad21	1925.34	2.5328	0.133797	18.9302	6.4265e-80	1.93339e-78
Rln3	861.675	-8.7762	0.463766	-18.9238	7.26698e-80	2.18214e-78
Ndufs2	1377.46	2.42796	0.128461	18.9003	1.1336e-79	3.39761e-78
Mob3c	3000.99	-2.87746	0.152278	-18.8961	1.22761e-79	3.67251e-78
Stxbp4	497.674	-4.55714	0.241196	-18.8939	1.28022e-79	3.82275e-78
Nap1l3	1281.53	-9.75444	0.516599	-18.882	1.60275e-79	4.7769e-78
Safb	1728.54	4.06469	0.215269	18.8819	1.60769e-79	4.78273e-78
Uqcrc1	1528.1	3.64205	0.192939	18.8767	1.77254e-79	5.26335e-78
Pipox	1345.14	-9.97248	0.52845	-18.8712	1.96864e-79	5.83482e-78
Zfp174	338.244	-5.33305	0.282665	-18.867	2.12895e-79	6.29831e-78
Slc26a1	606.315	-7.31049	0.387537	-18.864	2.25448e-79	6.65738e-78
Mertk	881.608	-9.06754	0.480712	-18.8627	2.31051e-79	6.81027e-78
Sipa1l2	3784.75	-3.12684	0.165841	-18.8544	2.70317e-79	7.95298e-78
Prpf6	983.03	3.50146	0.185714	18.854	2.72216e-79	7.99416e-78
Npdc1	1680.49	-9.08609	0.482064	-18.8483	3.03286e-79	8.89028e-78
Rpl3l	1462.03	-9.77478	0.518705	-18.8446	3.25606e-79	9.5271e-78
Tnfsf8	907.467	8.48996	0.450718	18.8365	3.79213e-79	1.10754e-77
Maz	2566.68	2.72831	0.144844	18.8362	3.81415e-79	1.11194e-77
Ptk7	3034.36	-10.3847	0.551517	-18.8293	4.34822e-79	1.26533e-77
Sptbn4	3560.81	-11.9894	0.637425	-18.8091	6.35738e-79	1.84664e-77
Tmem107	1117.18	-4.83636	0.257153	-18.8073	6.58234e-79	1.90852e-77
Rc3h1	1294.66	9.19361	0.48896	18.8024	7.22023e-79	2.08969e-77
Wdr36	741.311	4.51512	0.240223	18.7956	8.212e-79	2.37244e-77
Sh2d4b	2613.21	-9.2772	0.493776	-18.7883	9.42039e-79	2.71664e-77
Slc25a37	910.415	4.98692	0.265563	18.7787	1.12875e-78	3.24921e-77
Zfp184	795.515	-8.6687	0.461946	-18.7656	1.44344e-78	4.14763e-77
Rad9b	863.56	-3.65219	0.19466	-18.7619	1.54681e-78	4.43669e-77
Rab11a	2283.88	-2.37917	0.126872	-18.7526	1.84493e-78	5.28231e-77
Slc26a11	903.111	5.85422	0.312197	18.7517	1.87616e-78	5.36214e-77
Trp53cor1	675.188	-8.3197	0.444194	-18.7299	2.82648e-78	8.06378e-77
Zfp365	1012.64	-5.1643	0.275774	-18.7266	3.00629e-78	8.56152e-77
Pdzd8	887.527	5.32778	0.284643	18.7174	3.57123e-78	1.01523e-76
Naalad2	1134.6	-9.57082	0.511596	-18.7078	4.2782e-78	1.21405e-76
Mpnd	811.431	8.05929	0.43082	18.7069	4.35091e-78	1.2325e-76
Tgfbr2	2706.89	4.23341	0.226528	18.6882	6.17287e-78	1.74553e-76
Pnpla6	713.199	8.13011	0.435071	18.6869	6.33235e-78	1.78747e-76
Ndufs1	752.085	3.16321	0.169591	18.652	1.21687e-77	3.42886e-76
Plagl2	484.102	4.19734	0.225089	18.6475	1.32399e-77	3.71763e-76
Rtbdn	2334.42	-9.39326	0.503726	-18.6476	1.32176e-77	3.71763e-76
Nup214	7148.44	-2.50959	0.134611	-18.6433	1.43263e-77	4.01564e-76
Zcchc6	1650.07	4.04553	0.217269	18.6199	2.2156e-77	6.19941e-76
Phf3	1605.08	3.6178	0.194588	18.5922	3.71964e-77	1.03897e-75
Wipf1	4668.51	3.11769	0.167701	18.5908	3.813e-77	1.06319e-75
Pdp1	986.285	-2.61572	0.140802	-18.5773	4.90165e-77	1.36436e-75
Smarcd3	507.137	-4.64484	0.250135	-18.5694	5.6854e-77	1.57977e-75
Zfyve27	669.637	4.13739	0.222861	18.5649	6.17508e-77	1.71286e-75
Zfhx2	834.917	3.16891	0.170764	18.5573	7.12471e-77	1.97285e-75
Nub1	1570.42	8.52176	0.459275	18.5548	7.45803e-77	2.06158e-75
Stxbp1	366.467	-5.10362	0.275277	-18.5399	9.83415e-77	2.71372e-75
Mtmr12	1231.88	3.62767	0.195834	18.5242	1.3181e-76	3.63101e-75
Tm9sf1	630.608	3.41041	0.184242	18.5105	1.70047e-76	4.67628e-75
Sash1	1098.49	-6.32585	0.341839	-18.5054	1.86944e-76	5.13214e-75
Nup160	3301.22	-2.58854	0.13991	-18.5014	2.01145e-76	5.51256e-75
Ubtd1	2456.26	-4.4907	0.242982	-18.4816	2.90205e-76	7.9397e-75
Zfp91	824.018	8.3264	0.451501	18.4416	6.09209e-76	1.66389e-74
Ppip5k2	559.007	7.70082	0.417676	18.4373	6.59363e-76	1.7978e-74
Nktr	2153.26	10.8899	0.590837	18.4314	7.35855e-76	2.00295e-74
Rqcd1	556.491	3.62897	0.197026	18.4187	9.29453e-76	2.52562e-74
Src	301.55	-5.55541	0.301867	-18.4035	1.23149e-75	3.34069e-74
Zfp445	1245.65	4.66966	0.253801	18.3989	1.34011e-75	3.62918e-74
Mga	1470.44	2.93383	0.159554	18.3876	1.65076e-75	4.4629e-74
Prg3	2605.87	-11.0932	0.603729	-18.3744	2.10537e-75	5.68236e-74
Nin	3717.12	2.91021	0.158394	18.3733	2.15059e-75	5.79464e-74
Rasa3	6083.05	2.29327	0.124898	18.3612	2.68695e-75	7.22766e-74
Sh3bp4	1199.44	-7.85964	0.428067	-18.3608	2.70763e-75	7.27107e-74
Rsl1	968.347	-4.33534	0.236148	-18.3586	2.81983e-75	7.5597e-74
Rbm20	316.715	-4.99608	0.272141	-18.3584	2.82619e-75	7.56408e-74
Sema4f	910.322	6.87165	0.374325	18.3575	2.87765e-75	7.68894e-74
Ppip5k1	1018.66	-2.20612	0.120197	-18.3542	3.05375e-75	8.14587e-74
Sp3os	604.354	-4.95994	0.270239	-18.3539	3.07029e-75	8.17636e-74
Uckl1os	508.441	-3.7243	0.202965	-18.3495	3.33167e-75	8.85772e-74
Nmd3	556.685	4.08425	0.222617	18.3465	3.51891e-75	9.34e-74
Stxbp2	1447.38	2.76051	0.150655	18.3234	5.38557e-75	1.42709e-73
Traf3ip3	2081.8	3.50709	0.191418	18.3216	5.56452e-75	1.47207e-73
Polr3a	625.965	3.26345	0.178238	18.3095	6.94673e-75	1.83469e-73
Terc	531.794	-7.87019	0.430089	-18.299	8.43418e-75	2.22387e-73
Ptprg	631.046	-7.6136	0.416115	-18.2969	8.76402e-75	2.30704e-73
Sptlc1	381.503	6.15205	0.336786	18.2669	1.5178e-74	3.9889e-73
Znrf2	1063.01	4.73277	0.259223	18.2575	1.80244e-74	4.7292e-73
Rev3l	832.146	4.09094	0.224122	18.2532	1.95176e-74	5.11258e-73
Zfp777	578.722	3.0017	0.164566	18.2401	2.47931e-74	6.48389e-73
Utp18	602.596	5.42215	0.297498	18.2258	3.21972e-74	8.40648e-73
Rnf183	667.132	-8.67279	0.476215	-18.2119	4.15233e-74	1.08238e-72
U2af1	554.79	3.53431	0.194215	18.198	5.35631e-74	1.39395e-72
Rbm5	2357.14	3.52281	0.193629	18.1936	5.79983e-74	1.50692e-72
Slc36a1	491.421	3.36902	0.185205	18.1908	6.10857e-74	1.58457e-72
Rtkn	933.587	-9.29323	0.511608	-18.1647	9.82009e-74	2.54321e-72
Prpf38b	2596.77	2.1675	0.119378	18.1567	1.13732e-73	2.94069e-72
Ppox	451.955	6.9049	0.380345	18.1543	1.18722e-73	3.06475e-72
Mark3	790.157	7.67073	0.422623	18.1503	1.27685e-73	3.29081e-72
Zfand6	797.004	5.84052	0.321936	18.1419	1.4891e-73	3.83168e-72
Tbc1d5	543.439	4.10939	0.226591	18.1357	1.66432e-73	4.27566e-72
Zscan10	318.527	-4.94942	0.272962	-18.1323	1.77328e-73	4.54829e-72
Ube2q1	1634.28	2.36982	0.130858	18.1098	2.66655e-73	6.82851e-72
Scyl2	440.058	6.59162	0.364185	18.0996	3.20728e-73	8.20008e-72
Ubtd2	690.413	-4.73378	0.261862	-18.0774	4.80171e-73	1.2257e-71
Nab1	1045.95	9.29638	0.514327	18.0748	5.02981e-73	1.28188e-71
Slc25a13	625.963	-4.12116	0.228104	-18.067	5.79339e-73	1.47414e-71
Zfp110	564.507	3.18877	0.1766	18.0565	7.01921e-73	1.78321e-71
Sdhb	851.81	3.44816	0.19103	18.0504	7.83143e-73	1.9864e-71
Ripk2	1295.97	-2.84244	0.157662	-18.0286	1.1611e-72	2.94041e-71
Nip7	443.492	7.02128	0.389507	18.0261	1.21594e-72	3.07443e-71
Slc4a10	392.018	-6.35175	0.352437	-18.0223	1.30104e-72	3.28441e-71
Smoc1	547.937	-7.81667	0.433983	-18.0115	1.58366e-72	3.99157e-71
Tsta3	385.145	4.2419	0.235532	18.0099	1.62903e-72	4.09947e-71
Tsc22d3	5200.03	5.3865	0.299166	18.0051	1.7783e-72	4.46808e-71
Prss2	592.383	-6.62894	0.368345	-17.9965	2.07369e-72	5.2021e-71
Slc27a6	394.811	-6.439	0.357942	-17.9889	2.37842e-72	5.95722e-71
Zfp142	671.202	7.95345	0.442222	17.9852	2.54402e-72	6.36203e-71
Mtmr7	606.387	-7.28913	0.405346	-17.9825	2.67233e-72	6.67247e-71
Ppm1e	550.49	-5.83001	0.324302	-17.9771	2.94479e-72	7.34133e-71
Mark4	2562.59	-2.80266	0.155948	-17.9718	3.23953e-72	8.06356e-71
Slc16a8	489.29	-6.55383	0.364721	-17.9694	3.38132e-72	8.40342e-71
Tnpo2	1250.39	9.69663	0.539758	17.9648	3.67739e-72	9.12507e-71
Pdss2	1045.77	-4.25573	0.237005	-17.9563	4.28649e-72	1.062e-70
Rab23	782.361	-3.4344	0.191353	-17.948	4.97415e-72	1.23047e-70
Rnf223	1521.95	-8.6044	0.479588	-17.9412	5.62083e-72	1.38829e-70
Nt5c	864.981	2.62017	0.146077	17.9369	6.07976e-72	1.49933e-70
Smek2	1702.33	2.23109	0.12444	17.9291	6.99042e-72	1.72126e-70
Tsen15	4849.06	-7.09712	0.396322	-17.9075	1.03143e-71	2.53579e-70
Rnf208	2370.62	-10.3075	0.576664	-17.8744	1.8657e-71	4.57983e-70
Tacc3	1764.26	-3.15149	0.176382	-17.8674	2.11779e-71	5.19069e-70
Rnf121	1822.05	-3.19614	0.178953	-17.8603	2.40553e-71	5.88693e-70
Slc39a5	318.682	-5.95265	0.3333	-17.8597	2.42823e-71	5.93341e-70
Ubap2l	2501.94	11.3429	0.635302	17.8543	2.67776e-71	6.53316e-70
Tmc1	3945.05	-12.418	0.695925	-17.8439	3.22556e-71	7.8577e-70
Spp1	1179.98	-7.27688	0.408043	-17.8336	3.87455e-71	9.42434e-70
Ppp1r12a	2860.43	1.94155	0.108936	17.8229	4.6928e-71	1.13973e-69
Srp54a	587.939	-4.78176	0.268609	-17.802	6.82247e-71	1.65445e-69
Smyd1	590.021	-6.71127	0.377003	-17.8016	6.86636e-71	1.66257e-69
Stxbp3a	441.217	3.72761	0.209622	17.7825	9.65206e-71	2.33355e-69
Polr1a	932.748	5.78904	0.326156	17.7493	1.74564e-70	4.21403e-69
Shisa5	9120.47	13.7882	0.7775	17.7341	2.28842e-70	5.51599e-69
Pim2	1992.97	5.63445	0.31786	17.7262	2.63047e-70	6.33092e-69
Raver1	596.464	7.96857	0.449541	17.726	2.64117e-70	6.34714e-69
Mical1	2356	2.81806	0.15898	17.7259	2.64672e-70	6.35093e-69
Pyroxd1	965.782	-3.60294	0.203855	-17.674	6.65058e-70	1.59345e-68
Pde8a	3891.78	-4.59699	0.260225	-17.6654	7.74504e-70	1.85291e-68
Smad3	2264.66	3.31732	0.187837	17.6607	8.42201e-70	2.01186e-68
Rab27a	885.297	7.50153	0.42496	17.6523	9.76285e-70	2.32868e-68
Rem2	428.982	-7.1276	0.404173	-17.635	1.32661e-69	3.15957e-68
Phb2	1859.67	2.71572	0.154107	17.6222	1.66289e-69	3.95461e-68
Sntb2	642.259	7.13083	0.404736	17.6185	1.77765e-69	4.22127e-68
Sdhaf1	1632.46	-3.89062	0.22106	-17.5999	2.46827e-69	5.85253e-68
Pdia2	556.547	-8.15014	0.463408	-17.5874	3.07627e-69	7.28338e-68
Tgs1	2147	-2.8264	0.160719	-17.5859	3.15806e-69	7.46599e-68
Tia1	10253.1	-4.16187	0.236753	-17.5789	3.57275e-69	8.4339e-68
Sucla2	361.04	6.81309	0.387644	17.5756	3.78701e-69	8.92653e-68
Rps6ka5	2425.53	-3.77348	0.214732	-17.573	3.96536e-69	9.33317e-68
Tgfb2	877.999	-9.20492	0.523958	-17.568	4.32894e-69	1.0174e-67
Mef2d	2165.34	9.45302	0.538378	17.5583	5.13767e-69	1.2057e-67
Prpf18	539.56	3.50332	0.199561	17.5552	5.42934e-69	1.27228e-67
Sf1	4535.77	12.4391	0.708822	17.549	6.05149e-69	1.416e-67
Ppp6c	432.171	7.07451	0.403748	17.5221	9.71478e-69	2.26985e-67
Pdha1	1075.34	9.50283	0.542589	17.5139	1.12295e-68	2.61994e-67
Sptlc2	650.892	6.79146	0.387785	17.5135	1.13112e-68	2.63517e-67
Mdn1	5115.22	2.11697	0.120881	17.5128	1.1437e-68	2.6606e-67
Tbc1d20	578.612	4.06355	0.232152	17.5038	1.33944e-68	3.10692e-67
Mon2	1478.15	2.26716	0.129523	17.5039	1.33788e-68	3.10692e-67
S1pr1	2977.66	4.23994	0.242243	17.5028	1.36371e-68	3.15863e-67
Sh3d21	361.029	-5.46775	0.312429	-17.5007	1.41421e-68	3.27088e-67
Pcf11	2164.17	2.6839	0.153492	17.4856	1.84378e-68	4.25826e-67
Ugp2	2333.24	-2.64672	0.151511	-17.4688	2.47476e-68	5.70729e-67
Serf2	5148.83	-2.28245	0.130863	-17.4415	3.9952e-68	9.20046e-67
Mbd6	1347.83	2.92839	0.16798	17.433	4.63772e-68	1.06647e-66
Nckap5l	4787.99	-2.39698	0.137566	-17.4243	5.40106e-68	1.24023e-66
Tbc1d12	913.113	-4.25575	0.244298	-17.4203	5.78319e-68	1.32607e-66
Ube2l3	673.687	4.48204	0.257419	17.4115	6.75216e-68	1.54604e-66
Trim21	446.857	7.02529	0.403499	17.4109	6.81985e-68	1.55931e-66
Tert	454.205	-4.0734	0.233969	-17.41	6.92714e-68	1.58158e-66
Pin1	1619.93	-2.32748	0.133717	-17.4061	7.42198e-68	1.69215e-66
Pls3	453.869	-7.18939	0.413145	-17.4016	8.0239e-68	1.82678e-66
Rrp1	2509.71	1.77088	0.101779	17.3993	8.35659e-68	1.89982e-66
Pdcd1	419.951	-5.45688	0.313663	-17.3973	8.65555e-68	1.96499e-66
Tmsb10	6125.43	13.2494	0.762111	17.3852	1.06893e-67	2.42326e-66
Reep6	438.928	-7.81438	0.449693	-17.3771	1.22948e-67	2.78328e-66
Scarf2	876.41	-9.19891	0.52962	-17.3689	1.41966e-67	3.20928e-66
Znhit1	780.427	-2.69546	0.155223	-17.3651	1.51587e-67	3.42193e-66
Tmem17	495.194	-8.10572	0.466941	-17.3592	1.68027e-67	3.78771e-66
Rtn4r	760.067	-8.69988	0.50172	-17.3401	2.34313e-67	5.27451e-66
Wnk1	4982.13	2.94058	0.169692	17.3289	2.84776e-67	6.40146e-66
Pdlim4	481.479	-4.27696	0.246827	-17.3278	2.90461e-67	6.5201e-66
Ttc39a	421.292	-7.19302	0.415524	-17.3107	3.90399e-67	8.75117e-66
Morn2	428.653	-6.87404	0.397126	-17.3095	3.99127e-67	8.93431e-66
Ruvbl2	607.332	8.00887	0.462734	17.3077	4.11541e-67	9.19932e-66
Pkd1l2	657.552	-5.14372	0.29722	-17.3061	4.23131e-67	9.44519e-66
Sf3b1	9883.23	3.99544	0.231044	17.293	5.31454e-67	1.18467e-65
Wdr82	2470.27	4.17615	0.24179	17.2718	7.67553e-67	1.70858e-65
S100a14	489.718	-7.9744	0.462339	-17.248	1.15896e-66	2.57628e-65
Zfp131	676.398	4.2531	0.246678	17.2415	1.29563e-66	2.87609e-65
Minpp1	1673.36	-3.0994	0.179816	-17.2365	1.41272e-66	3.13167e-65
Tns1	2287.35	-4.49452	0.261334	-17.1983	2.73206e-66	6.04793e-65
Ssc5d	353.078	-5.61108	0.326615	-17.1795	3.7833e-66	8.36349e-65
Rab28	1245.01	-2.74267	0.159689	-17.1751	4.07667e-66	8.9996e-65
Srxn1	1781.48	-8.03079	0.467658	-17.1724	4.27741e-66	9.42974e-65
Zfp40	879.484	-3.79913	0.22135	-17.1635	4.9833e-66	1.09708e-64
Thumpd1	835.05	8.58735	0.500978	17.1412	7.3136e-66	1.60789e-64
Rps24	15291.7	2.21862	0.12951	17.1308	8.74627e-66	1.92022e-64
Ngly1	583.096	7.93637	0.464379	17.0903	1.75365e-65	3.84481e-64
Mdm2	1042.23	5.70425	0.333874	17.085	1.9182e-65	4.19984e-64
Spata13	4294.48	3.01984	0.176919	17.0691	2.52155e-65	5.51332e-64
Prkx	746.465	2.64083	0.154757	17.0644	2.73392e-65	5.96949e-64
Zbtb33	384.026	4.44778	0.261223	17.0268	5.20023e-65	1.13392e-63
Nbr1	1048.5	9.63948	0.566148	17.0264	5.22898e-65	1.13864e-63
Rad51ap1	671.682	-3.98654	0.234306	-17.0143	6.43711e-65	1.39981e-63
Rrp15	1646.02	-1.93866	0.114058	-16.9971	8.6228e-65	1.87256e-63
Tmem248	637.028	8.17488	0.480994	16.9958	8.82129e-65	1.91307e-63
Ttyh1	831.963	-9.47751	0.557723	-16.9932	9.21818e-65	1.99644e-63
Tsn	851.473	9.15234	0.538745	16.9883	1.00289e-64	2.1691e-63
Mrpl24	823.07	2.90728	0.171137	16.988	1.00833e-64	2.17792e-63
Sarm1	317.29	-3.42642	0.201775	-16.9814	1.12846e-64	2.4341e-63
Vimp	387.796	4.52084	0.266394	16.9705	1.35736e-64	2.9218e-63
Tcp1	2557.77	2.98287	0.175768	16.9705	1.35821e-64	2.9218e-63
Tshz3	611.796	-6.253	0.368719	-16.9587	1.65988e-64	3.56596e-63
Pitpnm1	4498.59	2.60507	0.153664	16.953	1.82768e-64	3.92117e-63
Tbr1	441.465	-7.81572	0.461254	-16.9445	2.11335e-64	4.528e-63
Ndst2	271.943	5.00086	0.295158	16.943	2.16651e-64	4.6357e-63
Wdr53	795.459	-3.17872	0.187624	-16.942	2.20673e-64	4.71544e-63
Ulk4	853.69	-9.5073	0.561667	-16.9269	2.84878e-64	6.0793e-63
Rbbp4	1846.71	3.77054	0.222765	16.9261	2.89113e-64	6.16145e-63
Phgdh	771.888	2.84697	0.16823	16.9231	3.03957e-64	6.4692e-63
Osbpl8	700.024	8.89426	0.52563	16.9211	3.1437e-64	6.68192e-63
Notch1	3494.75	2.87808	0.170131	16.9168	3.38149e-64	7.17781e-63
Vasp	5361.59	13.0565	0.773216	16.8859	5.71286e-64	1.21105e-62
Sart3	860.824	2.41141	0.142842	16.8816	6.14364e-64	1.30065e-62
Slc41a3	423.17	-4.36344	0.258518	-16.8787	6.4566e-64	1.3651e-62
Polr2a	3485.07	2.4577	0.145621	16.8774	6.59638e-64	1.39281e-62
Tas1r1	474.829	-7.51396	0.445226	-16.8767	6.67373e-64	1.40729e-62
Riiad1	1571.42	-10.8254	0.641448	-16.8764	6.70646e-64	1.41233e-62
Nfrkb	1603.86	3.25869	0.193094	16.8762	6.73445e-64	1.41636e-62
Mcts2	613.282	-2.80347	0.166238	-16.8642	8.2477e-64	1.73234e-62
Tmem109	538.817	3.5585	0.211031	16.8624	8.50058e-64	1.78312e-62
Vps45	920.394	-2.92816	0.173658	-16.8617	8.61171e-64	1.80406e-62
Ptger1	1113.84	5.61913	0.333251	16.8616	8.62753e-64	1.80501e-62
Uggt2	326.95	-4.83321	0.286726	-16.8566	9.39103e-64	1.96219e-62
Rassf1	883.855	4.9232	0.292209	16.8482	1.0816e-63	2.25698e-62
Zfp286	512.123	-7.30156	0.433505	-16.8431	1.17944e-63	2.45794e-62
Tsen54	453.963	2.97244	0.176534	16.8378	1.29034e-63	2.68554e-62
Vps29	1729.64	-2.14051	0.127155	-16.8339	1.3779e-63	2.86407e-62
Tsen2	1568.93	-4.29338	0.25511	-16.8295	1.48294e-63	3.0784e-62
Qpct	397.562	-4.43187	0.26351	-16.8186	1.78241e-63	3.69528e-62
Ncapg2	1205.09	-3.14693	0.187127	-16.8171	1.82994e-63	3.7889e-62
Ndufaf1	778.919	-2.86357	0.170411	-16.8039	2.2835e-63	4.72189e-62
Rmnd5a	1305.08	2.40092	0.142959	16.7946	2.67503e-63	5.52436e-62
Upb1	280.358	-5.96154	0.355182	-16.7844	3.17239e-63	6.54305e-62
Snx16	628.903	-3.79741	0.226464	-16.7683	4.16528e-63	8.57984e-62
Zfp72	446.243	-5.33329	0.318212	-16.7602	4.77286e-63	9.81872e-62
Ptges3	676.639	8.38026	0.500028	16.7596	4.81997e-63	9.90289e-62
Sin3b	1539.09	2.47268	0.147742	16.7364	7.11386e-63	1.45971e-61
Tnfrsf8	921.551	-8.97977	0.536765	-16.7294	8.00176e-63	1.6398e-61
Ssh2	6111.5	4.05345	0.24231	16.7284	8.14486e-63	1.66699e-61
Ngb	356.468	-7.40743	0.443014	-16.7205	9.2897e-63	1.89887e-61
Spns3	531.975	-5.35087	0.320075	-16.7175	9.76664e-63	1.99381e-61
Rsph1	273.933	-5.82363	0.348404	-16.7152	1.01663e-62	2.07276e-61
Tbcd	786.815	3.26742	0.195503	16.7129	1.05556e-62	2.1494e-61
Scn11a	1697.23	-6.38584	0.382111	-16.712	1.07176e-62	2.17962e-61
Zfp418	385.016	-4.18699	0.250562	-16.7104	1.10126e-62	2.23676e-61
Vpreb1	1188.58	-7.8151	0.467977	-16.6997	1.31637e-62	2.67028e-61
Ppm1k	2259.7	-3.07474	0.184353	-16.6786	1.87575e-62	3.80017e-61
Srd5a3	294.024	4.85081	0.290995	16.6697	2.17608e-62	4.40306e-61
Ufd1l	623.765	2.91753	0.175041	16.6677	2.24987e-62	4.54661e-61
Ndufb11	932.72	2.59749	0.155923	16.6588	2.6112e-62	5.27014e-61
Pcbd2	3140.35	-5.31161	0.319147	-16.6431	3.39526e-62	6.84398e-61
Stard6	258.374	-5.88842	0.353834	-16.6418	3.47155e-62	6.98894e-61
Mkln1os	383.167	-7.29671	0.438496	-16.6403	3.55841e-62	7.15482e-61
Utrn	3602.74	2.22302	0.133687	16.6285	4.33363e-62	8.7026e-61
Ppp2r4	1427.18	3.05007	0.183494	16.6222	4.8151e-62	9.65736e-61
Znhit2	1240.15	-2.58203	0.155465	-16.6085	6.04859e-62	1.21161e-60
Rfxank	1847.66	-2.64695	0.159447	-16.6009	6.86897e-62	1.37422e-60
Myo15	352.138	-7.28417	0.438816	-16.5996	7.01479e-62	1.40164e-60
U2af2	2712.68	2.79878	0.168888	16.5719	1.11339e-61	2.22192e-60
Unc5b	409.163	-7.07271	0.426942	-16.566	1.2277e-61	2.447e-60
Zc3h3	793.103	-2.52859	0.152805	-16.5478	1.66112e-61	3.30674e-60
Rlf	976.626	5.08468	0.307317	16.5454	1.72827e-61	3.43613e-60
Smarca5-ps	1933.04	-11.4136	0.689882	-16.5443	1.75924e-61	3.49338e-60
Med12	3768.17	3.31396	0.200344	16.5413	1.84902e-61	3.6671e-60
Plrg1	487.016	3.45174	0.208691	16.54	1.89117e-61	3.74606e-60
Zfp867	568.696	-3.84521	0.232623	-16.5298	2.23857e-61	4.42871e-60
Scd2	662.903	5.48749	0.331989	16.5291	2.26379e-61	4.47309e-60
Tob2	3106.95	11.3431	0.687238	16.5053	3.35871e-61	6.62838e-60
Ssh1	333.745	5.7466	0.34849	16.49	4.33119e-61	8.53703e-60
Rab4a	873.787	-5.47269	0.331919	-16.488	4.4735e-61	8.80669e-60
Tmem253	267.063	-5.78818	0.351365	-16.4734	5.69744e-61	1.12024e-59
Penk	366.005	-4.95623	0.300867	-16.4731	5.72159e-61	1.12361e-59
Polq	545.186	-2.68351	0.16294	-16.4693	6.09275e-61	1.19503e-59
Nsg1	653.769	-9.12884	0.554622	-16.4596	7.15996e-61	1.40263e-59
Raph1	5190.92	-5.4928	0.33377	-16.4568	7.49159e-61	1.4658e-59
Pelp1	433.715	7.52225	0.457469	16.4432	9.38429e-61	1.83389e-59
Myo18a	840.784	7.77876	0.473097	16.4422	9.5383e-61	1.86171e-59
Mib1	1680.65	-2.5647	0.156377	-16.4008	1.88887e-60	3.68226e-59
Mlxip	3034.76	3.63239	0.221586	16.3927	2.15596e-60	4.19783e-59
Skap1	2429.46	4.08358	0.249544	16.3642	3.44736e-60	6.70412e-59
Rabl2	369.817	-4.61074	0.281837	-16.3596	3.71433e-60	7.21455e-59
Meis3	354.205	7.13062	0.435919	16.3577	3.83409e-60	7.43813e-59
Rnf167	1398.38	9.61362	0.587793	16.3555	3.97713e-60	7.70629e-59
Moap1	597.141	-7.24154	0.442773	-16.355	4.00858e-60	7.75783e-59
Ppargc1b	300.291	4.67803	0.286071	16.3527	4.16432e-60	8.04951e-59
Slc9a4	1717.85	-11.2415	0.687954	-16.3405	5.08019e-60	9.80801e-59
Snrpc	1500.24	-2.45937	0.150549	-16.3361	5.46451e-60	1.05373e-58
Rnf170	630.565	-2.96633	0.181866	-16.3105	8.31003e-60	1.60051e-58
Xxylt1	4332.94	-4.4488	0.272844	-16.3053	9.05443e-60	1.74178e-58
Pde4dip	398.394	6.20204	0.380961	16.28	1.3691e-59	2.63054e-58
Rrbp1	1553.39	3.38901	0.2082	16.2777	1.42129e-59	2.72755e-58
Zfp623	751.816	-2.94544	0.18097	-16.2759	1.46454e-59	2.80718e-58
Usp49	1345.96	-3.56909	0.219298	-16.2751	1.48375e-59	2.84059e-58
Tecta	564.225	-8.73633	0.536939	-16.2706	1.59552e-59	3.05093e-58
l7Rn6	939.51	-2.15673	0.132561	-16.2697	1.61866e-59	3.09148e-58
Sh2b1	2465.48	1.86383	0.114637	16.2586	1.94166e-59	3.70397e-58
Rtn3	1109.75	6.52132	0.401111	16.2581	1.95577e-59	3.72645e-58
Slc22a1	3716.49	-12.6815	0.780257	-16.2529	2.1289e-59	4.05149e-58
Snrpa1	2766.33	-2.6269	0.161821	-16.2333	2.9309e-59	5.57115e-58
Sspo	333.946	-7.09469	0.437157	-16.2291	3.13779e-59	5.95734e-58
Tktl1	604.362	-8.82785	0.544076	-16.2254	3.33488e-59	6.32403e-58
2017-03-08	1126.78	-4.12523	0.254247	-16.2253	3.34167e-59	6.3294e-58
Ogfod1	2760.79	-2.9987	0.184831	-16.224	3.41157e-59	6.45415e-58
Mob3a	2171.1	3.37607	0.208203	16.2152	3.93614e-59	7.43778e-58
Skp1a	1039.27	9.84964	0.607807	16.2052	4.63311e-59	8.74444e-58
Tmem147	324.507	6.34175	0.391396	16.2029	4.80871e-59	9.06517e-58
Myl12b	2058.6	11.334	0.699917	16.1934	5.6178e-59	1.0578e-57
Vps37a	1562.45	-2.1723	0.134167	-16.191	5.84047e-59	1.09843e-57
Zfp14	554.348	-3.84561	0.237523	-16.1905	5.88957e-59	1.10637e-57
Pspn	403.181	-6.75575	0.417357	-16.187	6.2319e-59	1.1693e-57
Ppp1r9b	4425.74	3.7653	0.232668	16.1831	6.63579e-59	1.24363e-57
Vangl2	374.133	-7.58629	0.468843	-16.1809	6.88087e-59	1.28805e-57
Usp8	965.577	2.65905	0.164413	16.173	7.82503e-59	1.46308e-57
Mink1	2246.34	5.46763	0.338192	16.1672	8.58511e-59	1.60332e-57
Txlna	1441.12	2.8703	0.177634	16.1585	9.89225e-59	1.84529e-57
Polr2c	4135.38	-3.99904	0.247578	-16.1527	1.0875e-58	2.02625e-57
Psmb11	1256.48	-10.4988	0.650181	-16.1475	1.18196e-58	2.19969e-57
Snrnp48	497.712	3.53815	0.21919	16.1419	1.2944e-58	2.40614e-57
Pink1	732.008	3.82526	0.237087	16.1344	1.46214e-58	2.7148e-57
Zfp119a	247.073	-3.82381	0.237525	-16.0985	2.61236e-58	4.84483e-57
Tmem260	1629.68	-2.37836	0.147783	-16.0936	2.83118e-58	5.24457e-57
Smap2	2608.55	7.77979	0.483426	16.093	2.8548e-58	5.2822e-57
Tnfrsf1b	2083.54	9.90986	0.615912	16.0897	3.01111e-58	5.56499e-57
Nars	1774.25	2.5199	0.156675	16.0836	3.32512e-58	6.13824e-57
Sdhaf2	2613.19	-2.38546	0.148357	-16.0792	3.56951e-58	6.58179e-57
Srbd1	1891.8	-2.83283	0.176201	-16.0773	3.68025e-58	6.77818e-57
Sbk1	4769.45	-2.19576	0.136593	-16.0752	3.80773e-58	7.00491e-57
Rprd2	967.308	2.80459	0.174517	16.0706	4.1036e-58	7.54054e-57
Uso1	806.609	9.47902	0.590068	16.0643	4.54012e-58	8.33311e-57
Reep3	299.81	6.43025	0.400554	16.0534	5.41441e-58	9.92643e-57
Snapc4	1029.89	2.83473	0.176918	16.0228	8.86021e-58	1.62251e-56
Smarcad1	1205.63	-2.05151	0.128045	-16.0217	9.01611e-58	1.64918e-56
Mcoln1	1677.26	-1.80158	0.112463	-16.0192	9.38129e-58	1.71401e-56
Pip5k1b	764.583	-4.29809	0.268446	-16.011	1.07039e-57	1.95343e-56
Traf5	2264.96	-2.43316	0.15197	-16.0108	1.07473e-57	1.95912e-56
Vil1	318.719	-6.94324	0.433739	-16.0079	1.12626e-57	2.05072e-56
Uqcrc2	1674.81	3.06594	0.191545	16.0064	1.15253e-57	2.09617e-56
Zfp273	486.529	-4.26698	0.267005	-15.9809	1.73616e-57	3.15406e-56
Smim7	566.463	5.4114	0.338679	15.978	1.81949e-57	3.3017e-56
Uchl1	1118.51	-10.3392	0.647414	-15.9701	2.06582e-57	3.74444e-56
Sfrp2	928.406	-6.34092	0.397059	-15.9697	2.07721e-57	3.76084e-56
Nup62-il4i1	276.234	-6.93102	0.434027	-15.9691	2.09776e-57	3.79374e-56
Stk40	757.391	3.12285	0.195601	15.9654	2.22613e-57	4.02135e-56
Rtn4ip1	1913.97	-4.05704	0.254141	-15.9637	2.28667e-57	4.12606e-56
Naa38	892.938	-2.82597	0.177056	-15.9609	2.39391e-57	4.3147e-56
Selm	374.132	-5.47288	0.343019	-15.955	2.62951e-57	4.734e-56
Rnf10	1978.7	11.2723	0.706917	15.9457	3.05186e-57	5.48821e-56
Rad54b	423.097	-4.26582	0.267544	-15.9443	3.11894e-57	5.60254e-56
Spen	1749.55	11.1064	0.696774	15.9397	3.36153e-57	6.03153e-56
Srebf2	2305.48	2.53257	0.158932	15.9349	3.62534e-57	6.4976e-56
Nrros	1691.14	4.1615	0.261167	15.9342	3.66658e-57	6.56417e-56
Scrib	1226.93	10.3092	0.647263	15.9273	4.09379e-57	7.31263e-56
Terf2	521.882	8.46888	0.531719	15.9274	4.09262e-57	7.31263e-56
Ptpn1	2127.11	4.17561	0.262215	15.9244	4.29092e-57	7.65621e-56
Rmnd5b	686.598	8.84273	0.555387	15.9217	4.47805e-57	7.98119e-56
Zfp622	1359.61	4.6112	0.289665	15.9191	4.67178e-57	8.31723e-56
Tmem62	248.183	6.25507	0.393155	15.9099	5.4076e-57	9.61652e-56
Sardh	1427.11	-10.9772	0.690041	-15.908	5.57779e-57	9.90816e-56
Thyn1	534.957	-2.65312	0.166787	-15.9072	5.64769e-57	1.00212e-55
Mllt11	830.859	-3.50542	0.220452	-15.9011	6.22885e-57	1.10402e-55
2017-09-07	3318.89	-4.77914	0.300567	-15.9004	6.29382e-57	1.1143e-55
Timm8a2	257.687	-6.72549	0.42305	-15.8976	6.58105e-57	1.16386e-55
Polr2m	1367.4	4.64265	0.292044	15.8971	6.6381e-57	1.17266e-55
Ppfia3	940.163	-10.0954	0.635217	-15.8928	7.10542e-57	1.25383e-55
Uxt	473.064	-2.77365	0.174707	-15.876	9.29749e-57	1.63884e-55
Med11	1490.95	-2.15772	0.135942	-15.8723	9.85761e-57	1.73566e-55
Trim25	1272.06	1.99688	0.1259	15.8608	1.1831e-56	2.08082e-55
Zfp704	301.516	-6.23763	0.393285	-15.8603	1.19232e-56	2.09474e-55
Zmynd11	1906.59	2.88787	0.182155	15.8539	1.32055e-56	2.31747e-55
Pms1	725.237	-2.32932	0.147014	-15.8442	1.54114e-56	2.70164e-55
Rps3a1	11208.6	3.11246	0.196453	15.8433	1.56411e-56	2.73891e-55
Nop56	2676.64	3.84773	0.242904	15.8405	1.63419e-56	2.85849e-55
Pkp4	930.428	8.91396	0.563033	15.832	1.87086e-56	3.2689e-55
Zbtb3	283.575	-4.5734	0.289319	-15.8075	2.76303e-56	4.8225e-55
Zfp592	2290.94	7.29653	0.461854	15.7983	3.19369e-56	5.56808e-55
Rbm3os	1016.12	-3.95134	0.250247	-15.7898	3.65753e-56	6.36983e-55
Rpl9	10178.8	4.29331	0.271991	15.7847	3.96364e-56	6.89544e-55
Plin5	449.815	-8.25192	0.522819	-15.7835	4.0412e-56	7.02275e-55
Rcan1	1271.89	-4.09678	0.259599	-15.7812	4.19159e-56	7.27618e-55
Slc25a30	427.162	3.41741	0.216649	15.7739	4.7025e-56	8.15423e-55
Mob2	2067.18	-1.99509	0.126504	-15.7709	4.9313e-56	8.54172e-55
Padi1	647.832	-9.11555	0.578047	-15.7696	5.04008e-56	8.72069e-55
Zfp3	3083.78	-6.00987	0.381464	-15.7547	6.37287e-56	1.10149e-54
Nupl2	1192.46	-4.45226	0.282874	-15.7394	8.12319e-56	1.4025e-54
Rhot1	479.95	8.3518	0.531041	15.7272	9.84065e-56	1.69719e-54
Slc12a2	1274.02	-3.50294	0.222991	-15.7089	1.31535e-55	2.26611e-54
Trip4	4062.07	-3.16743	0.201667	-15.7062	1.37078e-55	2.35906e-54
Setd8	950.328	2.03717	0.129724	15.7039	1.42139e-55	2.44353e-54
Trps1	1792.41	-3.67192	0.233878	-15.7001	1.50945e-55	2.59215e-54
Rpl6	11110.9	2.98371	0.190053	15.6994	1.5266e-55	2.61878e-54
Surf4	1809.02	2.01229	0.128199	15.6966	1.59461e-55	2.73252e-54
Ppp2cb	5648.59	-2.67989	0.170805	-15.6897	1.77801e-55	3.04353e-54
Peg13	699.984	8.43662	0.537756	15.6886	1.81115e-55	3.09695e-54
T2	2722.15	-11.5587	0.736864	-15.6864	1.8748e-55	3.20236e-54
Sav1	354.677	7.47293	0.476769	15.6741	2.27424e-55	3.88052e-54
Tcea3	493.44	-8.72827	0.557197	-15.6646	2.64004e-55	4.49987e-54
Stk38	3120.57	2.71004	0.173043	15.6611	2.79186e-55	4.74977e-54
Samd11	282.853	-5.95955	0.380533	-15.661	2.79259e-55	4.74977e-54
Mknk2	6935.3	13.3635	0.853492	15.6575	2.95403e-55	5.01903e-54
Timm8a1	491.156	-3.15313	0.201436	-15.6533	3.15578e-55	5.35612e-54
Prr15	818.372	-9.89877	0.632485	-15.6506	3.2916e-55	5.58073e-54
Rock1	1415.24	10.8154	0.691189	15.6476	3.45184e-55	5.84622e-54
Slc4a2	792.87	9.20937	0.58865	15.6449	3.60044e-55	6.09144e-54
Tyw3	305.215	-3.77323	0.241212	-15.6428	3.7203e-55	6.28758e-54
Mtch1	656.697	8.97087	0.573843	15.633	4.34082e-55	7.32858e-54
Pik3cd	14203.8	3.59428	0.229939	15.6314	4.44759e-55	7.50092e-54
Pcgf2	1673.58	-3.13473	0.200564	-15.6296	4.57647e-55	7.71015e-54
Sbf2	444.516	-3.79463	0.242884	-15.6232	5.05894e-55	8.51401e-54
Ttc36	248.152	-6.33426	0.405624	-15.6161	5.6575e-55	9.51137e-54
Trappc3	335.095	3.00198	0.19231	15.6101	6.21547e-55	1.04385e-53
P2ry10	2650.38	5.79556	0.37139	15.6051	6.72564e-55	1.12834e-53
Prkd2	2138.95	4.65469	0.298329	15.6026	6.99355e-55	1.17206e-53
Marf1	1512	10.917	0.699775	15.6007	7.19898e-55	1.20523e-53
Rnft2	268.791	-4.33328	0.277806	-15.5982	7.48753e-55	1.25223e-53
Synrg	903.411	9.65149	0.618769	15.5979	7.52283e-55	1.25681e-53
Zfp688	582.752	-2.62308	0.168318	-15.5841	9.3405e-55	1.55886e-53
Stau2	2305.6	-8.1676	0.524144	-15.5827	9.53918e-55	1.59036e-53
Smagp	1083.77	-6.30194	0.404603	-15.5756	1.06625e-54	1.77578e-53
Syvn1	1090.36	8.85392	0.568593	15.5716	1.13507e-54	1.88843e-53
Myo5b	208.913	-5.75011	0.369321	-15.5694	1.17461e-54	1.9522e-53
Pitx2	540.704	-6.94119	0.446098	-15.5598	1.36571e-54	2.26744e-53
Samsn1	10587.5	-4.73672	0.304762	-15.5424	1.79206e-54	2.97223e-53
Rbm39	5537.94	4.05085	0.260782	15.5335	2.05861e-54	3.41076e-53
Parp1	1420.28	10.8148	0.696233	15.5333	2.06454e-54	3.41706e-53
Slc25a18	298.896	-6.26443	0.403407	-15.5288	2.214e-54	3.66064e-53
Tmsb4x	25963	16.3746	1.05495	15.5217	2.47567e-54	4.08907e-53
Sod1	1541.94	3.14161	0.20247	15.5164	2.68553e-54	4.43112e-53
Rpl4	34524.8	17.6619	1.13878	15.5095	2.99071e-54	4.92959e-53
Slfn14	2771.34	-12.2606	0.790806	-15.5039	3.26531e-54	5.37668e-53
Zbp1	684.911	7.41965	0.478682	15.5002	3.45937e-54	5.69036e-53
Rsrp1	3364.86	3.74785	0.241912	15.4926	3.89031e-54	6.39265e-53
Nckap1l	4082.16	3.10796	0.200636	15.4905	4.02028e-54	6.59945e-53
Sirt4	504.902	-3.44489	0.222398	-15.4898	4.06625e-54	6.66807e-53
Rab8b	1650.31	3.25527	0.210175	15.4884	4.15483e-54	6.80634e-53
Polh	1225.85	-2.79962	0.180851	-15.4802	4.71747e-54	7.72015e-53
Pigz	265.874	-6.02261	0.389372	-15.4675	5.74817e-54	9.39729e-53
Pck2	1063.61	-2.8208	0.182448	-15.4608	6.37519e-54	1.04117e-52
Nrn1l	349.12	-6.69144	0.432974	-15.4546	7.02252e-54	1.14572e-52
Slc38a1	2414.73	2.02931	0.131313	15.454	7.09206e-54	1.15589e-52
Rnf128	675.241	-6.49569	0.420547	-15.4458	8.05349e-54	1.31125e-52
Tmem198	577.047	-2.55133	0.165202	-15.4437	8.32039e-54	1.35333e-52
Tbc1d10c	3855.81	3.12262	0.202292	15.4362	9.34668e-54	1.51872e-52
Ppp1cc	4024.86	-2.80098	0.181466	-15.4353	9.47266e-54	1.53763e-52
N4bp2	661.612	8.99121	0.582648	15.4316	1.00292e-53	1.62632e-52
Mtl5	338.958	-7.84436	0.508561	-15.4246	1.1181e-53	1.81126e-52
Slc7a5	1496.47	8.61693	0.559007	15.4147	1.30383e-53	2.10999e-52
Trip12	2766.93	5.30977	0.344495	15.4132	1.3347e-53	2.15777e-52
Stat6	2958.14	2.12706	0.138005	15.4129	1.34027e-53	2.16459e-52
Prph2	5079	-13.5944	0.882241	-15.4089	1.42522e-53	2.29947e-52
Necap2	660.974	5.50118	0.357018	15.4087	1.43024e-53	2.30524e-52
Susd1	1527.45	-3.99516	0.259362	-15.4038	1.54345e-53	2.4852e-52
Stub1	1707.34	-2.46242	0.159945	-15.3954	1.75631e-53	2.8251e-52
Sh3bp5	2098.77	3.38702	0.220034	15.3932	1.81932e-53	2.92352e-52
Snhg8	745.162	3.0409	0.197635	15.3864	2.01951e-53	3.24195e-52
Mcmbp	1130.33	3.95363	0.257132	15.3759	2.37502e-53	3.80883e-52
Usp24	2847.83	2.51772	0.163749	15.3755	2.38998e-53	3.829e-52
Zfp599	402.253	-4.41707	0.287499	-15.3638	2.86386e-53	4.58362e-52
Upk1a	223.918	-4.34091	0.282712	-15.3545	3.30501e-53	5.28438e-52
Nelfe	1508.96	-2.63745	0.17182	-15.35	3.53965e-53	5.6539e-52
Tmem66	6105.6	2.78983	0.182046	15.3249	5.21651e-53	8.32404e-52
Ptprd	28212.5	-17.5366	1.1447	-15.3198	5.64079e-53	8.99212e-52
Slc37a1	865.004	8.02905	0.524154	15.3181	5.78779e-53	9.21727e-52
Nudt16l1	340.465	5.00476	0.326748	15.3169	5.89608e-53	9.3804e-52
Rassf5	3608.06	2.9524	0.192793	15.3138	6.18338e-53	9.82771e-52
Zfa-ps	865.262	-9.97979	0.651907	-15.3086	6.69814e-53	1.06353e-51
Mthfd1	998.266	2.80416	0.183239	15.3033	7.27045e-53	1.15326e-51
Nat2	1161.37	-3.93308	0.257011	-15.3032	7.28086e-53	1.15376e-51
Zcchc11	2168.9	6.69739	0.437726	15.3004	7.59962e-53	1.20309e-51
Wdr5	1134.16	1.92454	0.12581	15.2972	7.97888e-53	1.26188e-51
Nol3	456.318	-8.42855	0.551608	-15.28	1.03985e-52	1.64292e-51
Trmt2a	858.398	3.23324	0.211624	15.2782	1.0679e-52	1.68558e-51
Thoc1	527.369	2.57232	0.168374	15.2774	1.08161e-52	1.70553e-51
Ndufaf4	375.086	3.25074	0.212896	15.2692	1.22701e-52	1.9329e-51
Pigt	855.341	9.79952	0.641913	15.2661	1.28616e-52	2.0241e-51
Phf11d	191.801	-4.20006	0.275141	-15.2651	1.3062e-52	2.05361e-51
Snhg1	1890.3	9.28879	0.609583	15.2379	1.97994e-52	3.1098e-51
Shc1	643.286	4.95821	0.325816	15.2178	2.69404e-52	4.22727e-51
Ulbp1	875.16	-2.51888	0.165537	-15.2164	2.75263e-52	4.31497e-51
Phf13	460.388	4.86874	0.319972	15.2161	2.76388e-52	4.32836e-51
St3gal3	962.929	-3.17746	0.208824	-15.216	2.77006e-52	4.33381e-51
Myo1c	646.597	7.43017	0.488336	15.2153	2.80085e-52	4.3777e-51
Pik3r5	6406.48	7.07346	0.46512	15.2078	3.13852e-52	4.90069e-51
Stk11ip	4890.66	-2.91052	0.191393	-15.207	3.17694e-52	4.95584e-51
Wdr11	403.805	5.69733	0.374964	15.1944	3.85419e-52	6.00646e-51
Top1	1145.92	5.91042	0.389066	15.1913	4.03829e-52	6.28725e-51
Rilpl2	501.673	8.08123	0.53203	15.1894	4.15587e-52	6.46401e-51
Vps37d	2078.72	-11.4623	0.755521	-15.1713	5.47704e-52	8.51068e-51
Tnfsf12	1791.68	-7.94429	0.523879	-15.1644	6.08877e-52	9.45207e-51
Shisa2	395.887	-8.22177	0.542248	-15.1624	6.27554e-52	9.73256e-51
Tbc1d31	1221.79	-3.90016	0.257297	-15.1582	6.69187e-52	1.03682e-50
Treml2	1735.13	7.00125	0.461933	15.1564	6.8727e-52	1.06381e-50
Trim30d	1548.45	-2.57701	0.170164	-15.1443	8.26505e-52	1.27809e-50
Sfswap	761.382	9.63797	0.636501	15.1421	8.5417e-52	1.31959e-50
Tmem87a	697.865	5.10447	0.337451	15.1265	1.08229e-51	1.6704e-50
Slc7a8	353.708	-4.09082	0.270483	-15.1241	1.12267e-51	1.73106e-50
Mief2	1163.53	-2.48449	0.164366	-15.1155	1.27915e-51	1.97044e-50
Ms4a4c	1035.55	8.76737	0.580127	15.1128	1.3327e-51	2.05095e-50
Rab35	1538.83	2.29138	0.151628	15.1118	1.35376e-51	2.08135e-50
Traf3ip1	579.509	-2.18988	0.14492	-15.1109	1.37249e-51	2.10813e-50
Pdxdc1	459.887	2.92001	0.193246	15.1103	1.38417e-51	2.12402e-50
Tbc1d14	1001.08	3.35061	0.222094	15.0864	1.98858e-51	3.04858e-50
Ufc1	362.518	7.78664	0.516197	15.0846	2.04388e-51	3.13037e-50
Slfn5	497.623	2.80985	0.186375	15.0763	2.31983e-51	3.54622e-50
Trub2	2622.88	-3.32539	0.220571	-15.0763	2.31955e-51	3.54622e-50
Xdh	1516.9	3.53099	0.23432	15.0691	2.58637e-51	3.94989e-50
Psmd10	900.791	-2.12715	0.141163	-15.0687	2.60108e-51	3.96856e-50
Wars2	1759.62	-3.1758	0.210783	-15.0667	2.68298e-51	4.08964e-50
Myo6	382.166	7.69549	0.510978	15.0603	2.95316e-51	4.49718e-50
Zfpm1	648.574	4.2623	0.283075	15.0571	3.09899e-51	4.71476e-50
Slain1	3484.04	-2.29947	0.152797	-15.0492	3.49321e-51	5.30948e-50
Ostf1	2478.25	3.03549	0.201718	15.0482	3.54717e-51	5.38638e-50
Nxf1	5336.83	13.4912	0.897009	15.0402	4.00586e-51	6.07713e-50
Rab14	1022.94	2.34797	0.156149	15.0367	4.22079e-51	6.39713e-50
Sidt2	5862.35	8.56044	0.570373	15.0085	6.45884e-51	9.77991e-50
Msh5	298.438	-3.53181	0.235343	-15.0071	6.60037e-51	9.98477e-50
Pstpip1	2111.24	4.71829	0.31448	15.0035	6.96562e-51	1.05274e-49
Rbm6	950.614	2.70086	0.18014	14.9931	8.14405e-51	1.22967e-49
Mdfi	340.269	-7.0128	0.467798	-14.9911	8.39671e-51	1.26663e-49
Prps2	928.515	9.91293	0.661628	14.9826	9.53703e-51	1.43729e-49
Nudt19	263.131	4.53309	0.302737	14.9737	1.09033e-50	1.64165e-49
Sik1	2992.17	8.52875	0.569831	14.9672	1.20334e-50	1.8101e-49
Mtdh	1153.2	10.5284	0.703588	14.9638	1.2656e-50	1.90196e-49
Phkg1	214.109	-6.56115	0.438483	-14.9633	1.27542e-50	1.91493e-49
Mid1	777.994	-3.71837	0.248809	-14.9447	1.68661e-50	2.52992e-49
Ttll3	372.571	7.42606	0.497268	14.9337	1.98897e-50	2.98066e-49
Ube2d2a	565.061	4.06474	0.272199	14.9329	2.01183e-50	3.0121e-49
Ogg1	957.926	-3.16621	0.212133	-14.9256	2.24733e-50	3.36155e-49
Zfp947	269.678	-7.23158	0.484552	-14.9243	2.29187e-50	3.42497e-49
Rab10	1463.61	7.67441	0.514362	14.9202	2.43377e-50	3.63363e-49
Tcerg1	1552.96	2.00909	0.134686	14.9169	2.55875e-50	3.81666e-49
Mtss1l	251.484	-4.56727	0.306259	-14.9131	2.70909e-50	4.03715e-49
Tspan33	420.498	-5.95076	0.399073	-14.9115	2.77509e-50	4.13165e-49
Rbm11	1613.27	-11.5113	0.772566	-14.9001	3.28998e-50	4.89369e-49
Slfnl1	889.558	-10.3047	0.692143	-14.8882	3.93371e-50	5.84578e-49
Txn2	1588.37	2.65195	0.178142	14.8867	4.02317e-50	5.97318e-49
Xcr1	612.956	-6.11686	0.410919	-14.8858	4.0764e-50	6.04659e-49
Psme4	722.559	3.04357	0.204603	14.8755	4.75528e-50	7.04706e-49
Tug1	1443.28	2.41669	0.162607	14.8622	5.80228e-50	8.5907e-49
Notch4	1282.64	-6.80067	0.457635	-14.8604	5.9527e-50	8.80526e-49
Zfpl1	259.732	5.93552	0.399428	14.8601	5.98677e-50	8.84748e-49
Top3b	3893.85	-2.28693	0.153948	-14.8552	6.44138e-50	9.51055e-49
Mfng	1576.02	2.1383	0.143945	14.855	6.45725e-50	9.52518e-49
Xirp1	2477.74	-11.3819	0.766245	-14.8542	6.53853e-50	9.63621e-49
Sppl2a	841.562	8.27305	0.557204	14.8474	7.22754e-50	1.06418e-48
Plch2	329.637	-7.6455	0.515265	-14.838	8.31934e-50	1.22381e-48
Mtmr1	1002.54	10.3337	0.696755	14.8311	9.21628e-50	1.35451e-48
Mboat2	459.853	-8.82995	0.595676	-14.8234	1.034e-49	1.51828e-48
Oxct1	802.08	9.71238	0.655724	14.8117	1.23103e-49	1.80592e-48
Ptch2	447.639	-8.7942	0.59399	-14.8053	1.35396e-49	1.98444e-48
Zfp160	1176.9	-3.03467	0.204984	-14.8045	1.37082e-49	2.00732e-48
Psenen	1056.71	-2.18207	0.147471	-14.7966	1.54018e-49	2.25326e-48
Traf1	1867.56	8.52843	0.576735	14.7874	1.76564e-49	2.58073e-48
Ttc19	658.227	-2.07564	0.140392	-14.7847	1.83951e-49	2.68626e-48
Tmem190	499.784	-8.94908	0.605575	-14.7778	2.03627e-49	2.97088e-48
Shoc2	740.662	2.62241	0.17747	14.7767	2.0716e-49	3.01967e-48
Sec22b	364.417	6.67326	0.451631	14.7759	2.09498e-49	3.05098e-48
Nup50	1196.31	3.31225	0.224278	14.7685	2.33893e-49	3.40314e-48
Mlh1	361.374	4.06366	0.275206	14.7659	2.43156e-49	3.5347e-48
Zfp276	503.333	3.29813	0.223405	14.763	2.53853e-49	3.68686e-48
Vapb	641.549	9.39911	0.63691	14.7574	2.75881e-49	4.00316e-48
Pttg1	288.272	3.16721	0.214734	14.7495	3.09943e-49	4.49333e-48
Zfp128	366.267	-4.64042	0.314721	-14.7446	3.3339e-49	4.82888e-48
Mcur1	360.43	3.77395	0.255963	14.7441	3.3557e-49	4.85606e-48
Oscp1	701.955	-7.21996	0.489758	-14.7419	3.46891e-49	5.01535e-48
Prkag2	3879.73	-3.02937	0.205589	-14.735	3.84029e-49	5.54728e-48
Rbm44	843.857	-10.2287	0.69472	-14.7234	4.55835e-49	6.57858e-48
Slc17a9	1070.65	10.3977	0.706632	14.7145	5.20199e-49	7.5007e-48
Rps6ka4	591.301	5.32046	0.361626	14.7126	5.35212e-49	7.71023e-48
Snrpf	914.483	-3.15205	0.214347	-14.7054	5.95514e-49	8.57123e-48
Pdpr	2171.53	-3.61457	0.245843	-14.7028	6.18804e-49	8.89843e-48
Mgat1	707.68	9.53672	0.64913	14.6915	7.30311e-49	1.04831e-47
Mb21d1	2437.69	-3.5139	0.239178	-14.6915	7.30258e-49	1.04831e-47
Txnl4b	586.875	-2.87492	0.195712	-14.6895	7.52371e-49	1.07901e-47
Med19	718.995	-2.23677	0.152283	-14.6883	7.66591e-49	1.09841e-47
Zfp747	1556.47	-3.29841	0.224566	-14.6879	7.70291e-49	1.10273e-47
Prox1	438.162	-8.76251	0.597155	-14.6738	9.49265e-49	1.35773e-47
Pip4k2a	1072.39	3.23391	0.220494	14.6666	1.05437e-48	1.50671e-47
Zfp612	258.783	-6.80977	0.464427	-14.6628	1.11655e-48	1.59414e-47
Ptplb	716.765	-2.80305	0.191191	-14.661	1.1462e-48	1.63502e-47
Tnip3	696.41	-6.48621	0.44256	-14.6561	1.2312e-48	1.7547e-47
Wdr26	3279.39	2.66238	0.181722	14.6509	1.33034e-48	1.89431e-47
Pde6a	612.209	-9.48493	0.648476	-14.6265	1.90335e-48	2.70783e-47
Tbcc	489.799	-2.3027	0.15754	-14.6167	2.19855e-48	3.12502e-47
Supt20	906.377	2.40455	0.164523	14.6153	2.2445e-48	3.18751e-47
Jun	13369.2	6.90239	0.47258	14.6058	2.58019e-48	3.66098e-47
Sp3	1909.26	2.15038	0.147258	14.6028	2.69538e-48	3.82104e-47
Ube2l6	424.27	-4.89641	0.335342	-14.6012	2.75853e-48	3.9071e-47
Stx18	1053.27	-2.07122	0.14193	-14.5932	3.10144e-48	4.3889e-47
Trcg1	391.413	-8.38401	0.574643	-14.5899	3.25486e-48	4.60195e-47
Srp19	370.376	6.30527	0.432522	14.5779	3.88204e-48	5.48385e-47
Pycr1	415.783	-7.4894	0.513771	-14.5773	3.9171e-48	5.5285e-47
Rag2	1383.9	-11.294	0.774853	-14.5756	4.0132e-48	5.65914e-47
Sugp2	846.551	8.09403	0.555386	14.5737	4.12905e-48	5.81738e-47
Mybbp1a	3854.43	13.0454	0.89515	14.5734	4.14714e-48	5.83773e-47
Tle4	1086.27	5.44224	0.373453	14.5728	4.18687e-48	5.88847e-47
Numb	364.692	7.47648	0.513101	14.5712	4.28517e-48	6.02144e-47
Uhrf1bp1	698.972	-2.60498	0.178871	-14.5634	4.79754e-48	6.73549e-47
Vat1l	3235.04	-12.9561	0.890059	-14.5565	5.31358e-48	7.45344e-47
Sphk1	589.681	-9.42232	0.647413	-14.5538	5.5238e-48	7.74154e-47
Zufsp	309.617	3.75261	0.25785	14.5535	5.55175e-48	7.77391e-47
Slc4a3	363.485	-8.29574	0.570651	-14.5373	7.02938e-48	9.83438e-47
Mmp11	195.096	-6.06087	0.417295	-14.5242	8.51503e-48	1.19025e-46
Msgn1	257.803	-7.29903	0.502656	-14.5209	8.92715e-48	1.24676e-46
Nrg2	542.998	-5.97299	0.411488	-14.5156	9.64969e-48	1.3465e-46
Parpbp	611.053	-4.87063	0.335571	-14.5145	9.81398e-48	1.36823e-46
Tmem26	235.639	-6.80497	0.468898	-14.5127	1.00695e-47	1.40263e-46
Sytl4	1140.48	-9.85562	0.679141	-14.5119	1.01875e-47	1.41783e-46
Slc16a6	429.961	4.84415	0.334093	14.4994	1.22197e-47	1.69918e-46
Zfp451	461.422	2.62043	0.180803	14.4933	1.33632e-47	1.85658e-46
Nfx1	1679.7	2.28273	0.15769	14.476	1.71734e-47	2.38387e-46
Mical2	378.88	-4.53243	0.313245	-14.4693	1.89385e-47	2.6266e-46
Wdr59	266.324	5.97949	0.413545	14.4591	2.19645e-47	3.04365e-46
Papln	241.799	-6.44016	0.445696	-14.4497	2.51908e-47	3.48771e-46
Nr2c2	632.836	9.38448	0.649502	14.4487	2.55316e-47	3.53184e-46
Taf11	1494.55	-2.49328	0.172627	-14.4431	2.77024e-47	3.82881e-46
Zfp384	854.166	2.93061	0.202928	14.4416	2.83225e-47	3.91115e-46
Srrm4	13056.7	-16.4769	1.14122	-14.438	2.98562e-47	4.11939e-46
Rpl7l1	5943.15	-3.23918	0.224382	-14.436	3.06962e-47	4.23164e-46
Zmynd8	1144.6	7.73546	0.536001	14.4318	3.26406e-47	4.49581e-46
Sv2a	453.457	-3.83035	0.265474	-14.4283	3.43352e-47	4.72516e-46
Psma8	815.505	-10.1723	0.70508	-14.4271	3.49255e-47	4.80226e-46
Tdp2	438.098	7.64935	0.53031	14.4243	3.63912e-47	4.9995e-46
Nob1	1010.28	2.31922	0.160855	14.4182	3.97857e-47	5.46114e-46
Nkain1	161.369	-5.56486	0.386048	-14.4149	4.1683e-47	5.71668e-46
Rpl12	14327.9	16.4436	1.14091	14.4126	4.31127e-47	5.9077e-46
Mro	313.499	-7.88447	0.547292	-14.4063	4.72144e-47	6.46422e-46
Naip2	318.389	2.78004	0.192997	14.4046	4.84377e-47	6.62602e-46
Ppil6	186.884	-6.08226	0.422698	-14.3891	6.05438e-47	8.27501e-46
Tra2a	1351.74	10.7419	0.746675	14.3863	6.30605e-47	8.61163e-46
Ptpn21	1060.61	-3.26632	0.227098	-14.3829	6.62883e-47	9.04471e-46
Scap	1546.74	7.85562	0.546273	14.3804	6.87081e-47	9.36689e-46
Nr3c1	1411.01	11.1614	0.77618	14.3799	6.9232e-47	9.43028e-46
Usp53	267.08	7.04328	0.490104	14.371	7.86942e-47	1.071e-45
Pus10	212.846	3.60068	0.250662	14.3647	8.61824e-47	1.17192e-45
Rnf38	1651.15	6.6043	0.460046	14.3557	9.80899e-47	1.33271e-45
Stk39	2494.98	-3.83992	0.267669	-14.3458	1.13267e-46	1.5376e-45
Slc50a1	1017.25	3.67675	0.256355	14.3424	1.18803e-46	1.61139e-45
Pawr	378.793	-8.55734	0.596652	-14.3423	1.19083e-46	1.61382e-45
Vwa1	506.649	-9.21148	0.642314	-14.3411	1.21152e-46	1.64048e-45
Pced1a	335.212	7.82107	0.545372	14.3408	1.21645e-46	1.64576e-45
Rgs2	2562.92	6.75253	0.471184	14.331	1.40088e-46	1.89368e-45
Tnfsf10	561.791	7.45042	0.520239	14.3212	1.61392e-46	2.17982e-45
Osgep	328.244	7.78335	0.544041	14.3065	1.992e-46	2.68819e-45
Rbfox2	334.628	-7.97062	0.557266	-14.3031	2.09343e-46	2.82269e-45
Vip	14246.7	-16.5726	1.15966	-14.2909	2.49523e-46	3.36162e-45
Naip7	502.309	-9.20172	0.644481	-14.2777	3.01335e-46	4.05624e-45
Pid1	2975.91	-7.00457	0.490852	-14.2702	3.35541e-46	4.51289e-45
Zbtb18	293.382	6.22434	0.436375	14.2638	3.68116e-46	4.94685e-45
Tnip1	1075.93	5.98965	0.419974	14.262	3.77704e-46	5.07144e-45
Akt3	917.481	-2.19076	0.153642	-14.2589	3.94774e-46	5.29619e-45
Wipi2	800.949	7.92258	0.555822	14.2538	4.24472e-46	5.68985e-45
Pfdn5	1648.92	2.68844	0.188724	14.2453	4.79408e-46	6.42086e-45
Nf2	750.861	9.91071	0.696206	14.2353	5.53118e-46	7.40189e-45
Rabl3	564.101	-3.45886	0.243021	-14.2328	5.73532e-46	7.66865e-45
Ube2d3	3168.05	2.25328	0.15837	14.2279	6.14791e-46	8.21347e-45
Ubb	1378.5	-4.74753	0.333756	-14.2246	6.45157e-46	8.61196e-45
Mxra7	477.061	-8.46307	0.595579	-14.2098	7.96274e-46	1.06203e-44
Rpl39l	1010	-10.4567	0.735989	-14.2077	8.21103e-46	1.09423e-44
Phf6	1977.15	-1.74802	0.123074	-14.203	8.77509e-46	1.16843e-44
Pank3	686.487	3.33015	0.234497	14.2012	8.99962e-46	1.19733e-44
Psmc1	3145.41	-2.13089	0.150056	-14.2006	9.08084e-46	1.20713e-44
Vamp4	849.715	-2.18717	0.154051	-14.1977	9.46798e-46	1.25755e-44
Rere	1962.09	7.86817	0.554238	14.1964	9.64554e-46	1.28007e-44
Neu3	509.275	-4.07254	0.287183	-14.181	1.20174e-45	1.59353e-44
Ramp1	2412.24	-4.53995	0.320304	-14.1739	1.3294e-45	1.76135e-44
Zcchc17	246.667	7.08199	0.499686	14.1729	1.34839e-45	1.78503e-44
Ptpn14	1017.46	-5.61814	0.396537	-14.168	1.44558e-45	1.91211e-44
Rpp25	256.371	-7.60366	0.536686	-14.1678	1.44974e-45	1.91603e-44
Ranbp3	1107.02	8.21838	0.580902	14.1476	1.93181e-45	2.55104e-44
Tmem67	484.568	-4.9924	0.352956	-14.1446	2.01743e-45	2.6619e-44
S100a11	610.689	4.73053	0.33448	14.143	2.06443e-45	2.72169e-44
Rab26	298.543	-7.81467	0.552923	-14.1334	2.36479e-45	3.1151e-44
Mc1r	1093.6	-10.9554	0.775835	-14.1207	2.8305e-45	3.7255e-44
Smc1b	648.665	-9.85475	0.697981	-14.1189	2.90345e-45	3.81838e-44
Prmt5	1181.23	2.86953	0.20345	14.1043	3.57129e-45	4.69281e-44
Zfp668	999.236	-2.13044	0.15105	-14.1042	3.57981e-45	4.70016e-44
Uaca	1191.03	-11.0737	0.78525	-14.1021	3.68562e-45	4.83511e-44
Mettl18	387.854	-2.39006	0.169591	-14.0931	4.18859e-45	5.49044e-44
Mtmr3	2323.02	2.33162	0.165459	14.0918	4.2628e-45	5.58315e-44
Tjp1	169.076	-4.15324	0.294869	-14.085	4.69435e-45	6.14334e-44
Xrcc2	772.223	-3.73447	0.265305	-14.0761	5.32366e-45	6.96121e-44
Mdm4	1984.34	3.72652	0.264753	14.0755	5.3751e-45	7.02273e-44
Plcl2	1239.69	10.9753	0.77988	14.0731	5.55958e-45	7.25784e-44
Nsa2	1231.67	10.9667	0.779337	14.0718	5.65819e-45	7.38054e-44
Pcbp1	2644.01	12.5293	0.890417	14.0713	5.70222e-45	7.43193e-44
Rpl32	15134.1	3.02785	0.215274	14.0651	6.22295e-45	8.10401e-44
Ttc14	859.31	10.077	0.716485	14.0645	6.27939e-45	8.17087e-44
Pdcd6	5212.81	-2.32074	0.165262	-14.0428	8.53266e-45	1.10938e-43
Zfp595	1359.55	-3.67093	0.261466	-14.0398	8.89645e-45	1.15574e-43
Trmt44	658.421	-2.60679	0.185823	-14.0283	1.04558e-44	1.35722e-43
Ncr1	4495.56	-4.9112	0.350321	-14.0191	1.19059e-44	1.54419e-43
Purg	289.885	-4.21914	0.300974	-14.0183	1.20535e-44	1.56208e-43
Msh2	766.709	9.91896	0.70764	14.017	1.22759e-44	1.58961e-43
Mms19	1059.92	7.08809	0.505992	14.0083	1.38674e-44	1.79424e-43
Sh2d1a	476.806	5.94938	0.424775	14.006	1.43319e-44	1.85284e-43
Nono	2696.86	1.92771	0.137748	13.9944	1.68543e-44	2.17718e-43
Tnfsf14	352.715	7.082	0.506148	13.9919	1.74559e-44	2.25308e-43
Ncln	1787.77	3.7932	0.271111	13.9913	1.76065e-44	2.27069e-43
Samd9l	2630	12.5162	0.894667	13.9897	1.80074e-44	2.32052e-43
Parp10	1684.92	1.67593	0.119907	13.9769	2.15592e-44	2.77598e-43
Zfat	509.748	-2.16993	0.155281	-13.9742	2.23974e-44	2.8816e-43
Rps11	9902.81	15.9328	1.14115	13.9621	2.65675e-44	3.41536e-43
Smad6	1087.14	-8.63648	0.618585	-13.9617	2.67077e-44	3.43063e-43
Tln1	10417.5	15.9966	1.146	13.9586	2.78952e-44	3.58029e-43
Nhsl1	175.124	-3.71608	0.266238	-13.9577	2.82272e-44	3.62e-43
Sec61b	2451.1	-1.79786	0.128828	-13.9555	2.91326e-44	3.73312e-43
Ranbp17	618.699	-9.78942	0.701773	-13.9496	3.16528e-44	4.05283e-43
Tkt	3358.42	4.42758	0.317421	13.9486	3.2086e-44	4.10501e-43
Zfp455	418.654	-4.24017	0.304058	-13.9453	3.36194e-44	4.29775e-43
Mea1	1819.82	-2.33161	0.167319	-13.9351	3.87804e-44	4.95356e-43
Setd5	2409.73	1.81473	0.13023	13.9348	3.893e-44	4.9687e-43
Syngap1	853.093	-5.18235	0.371954	-13.9328	4.00469e-44	5.10718e-43
Prosc	629.539	2.42448	0.17403	13.9314	4.08359e-44	5.20366e-43
Pabpc2	8863.14	-15.9378	1.14411	-13.9303	4.14707e-44	5.28034e-43
Plbd2	381.071	8.18638	0.587683	13.9299	4.16817e-44	5.30299e-43
Sh3gl3	990.377	-10.8178	0.776662	-13.9286	4.24691e-44	5.39887e-43
Ppargc1a	205.095	-5.89225	0.423048	-13.9281	4.27637e-44	5.43201e-43
Ppfia1	1076.66	10.7821	0.774277	13.9253	4.44447e-44	5.64106e-43
Pik3c3	575.672	2.56967	0.184684	13.9138	5.21992e-44	6.62003e-43
Ubqln1	1497.48	3.34766	0.240833	13.9003	6.30432e-44	7.98896e-43
Matr3	2570.41	12.4805	0.898458	13.891	7.18017e-44	9.09166e-43
Zfp182	270.611	3.25876	0.234649	13.8878	7.50981e-44	9.50154e-43
Slc25a28	349.091	2.5938	0.186788	13.8863	7.6662e-44	9.69175e-43
Zfp870	596.392	-5.68426	0.409496	-13.8811	8.2457e-44	1.04161e-42
Zfp580	301.643	-3.63039	0.261663	-13.8743	9.06346e-44	1.14401e-42
N4bp2l1	3067.75	-3.16439	0.228115	-13.8719	9.37229e-44	1.18206e-42
Trrap	2406.31	12.393	0.893504	13.8701	9.61253e-44	1.21141e-42
Mon1b	474.794	8.95856	0.646508	13.8568	1.15641e-43	1.4562e-42
Tbc1d23	1744.99	-3.01159	0.217344	-13.8563	1.16477e-43	1.46558e-42
Parg	547.757	4.34952	0.314086	13.8482	1.30458e-43	1.6402e-42
Tk2	614.525	4.30784	0.311099	13.8472	1.3231e-43	1.66218e-42
Oxt	284.14	-7.75443	0.560523	-13.8343	1.58346e-43	1.98771e-42
Pnck	282.386	-7.9181	0.572554	-13.8295	1.69304e-43	2.12359e-42
Tuba3a	287.037	-6.94515	0.502896	-13.8103	2.20932e-43	2.76901e-42
Zfp275	522.836	2.95647	0.214186	13.8033	2.43616e-43	3.05092e-42
Tmem123	2202.86	5.38023	0.389888	13.7994	2.5694e-43	3.21527e-42
Recql	447.999	5.45232	0.395212	13.7959	2.69668e-43	3.3719e-42
Sema3a	9204.21	-15.0711	1.09268	-13.7928	2.81554e-43	3.51778e-42
Tcea1	445.236	8.8785	0.644007	13.7863	3.08025e-43	3.84551e-42
Stat5a	3734.75	-2.26231	0.164147	-13.7822	3.26129e-43	4.06835e-42
Mogs	779.71	9.94686	0.721797	13.7807	3.3307e-43	4.1517e-42
Mtcp1	569.073	-2.66044	0.193099	-13.7775	3.47907e-43	4.33327e-42
Myo5c	342.88	-8.00046	0.580857	-13.7735	3.67767e-43	4.57707e-42
Sell	8778.16	15.7619	1.14455	13.7713	3.79575e-43	4.72036e-42
Otud6a	2067.88	-12.329	0.895353	-13.7699	3.86604e-43	4.80403e-42
Scrn2	1225.25	-3.2097	0.233218	-13.7627	4.27405e-43	5.30638e-42
Nup37	1152.26	-3.86686	0.280968	-13.7626	4.27693e-43	5.30638e-42
Pars2	857.667	-4.13843	0.300754	-13.7602	4.42576e-43	5.48678e-42
Prph	928.939	-10.7263	0.77967	-13.7575	4.59218e-43	5.68869e-42
Mturn	219.637	5.06526	0.368738	13.7367	6.118e-43	7.57297e-42
Utp14a	648.376	9.69205	0.705623	13.7355	6.2262e-43	7.70095e-42
Sf3a2	3545.76	-1.62062	0.117992	-13.7349	6.27195e-43	7.75154e-42
Nudcd1	1411.57	-2.83168	0.206174	-13.7344	6.31917e-43	7.80388e-42
Tbc1d13	4072.11	-2.33876	0.170332	-13.7306	6.65654e-43	8.21417e-42
Zmym4	1283.66	-1.6687	0.121551	-13.7284	6.85895e-43	8.45743e-42
Prdm2	2941.62	2.97548	0.216745	13.728	6.90055e-43	8.50218e-42
Paxip1	596.948	9.58647	0.698839	13.7177	7.95427e-43	9.79293e-42
Vwa8	613.582	9.62387	0.701611	13.7168	8.05199e-43	9.90562e-42
Tes	1616.36	2.13332	0.155574	13.7126	8.53885e-43	1.04965e-41
Prr15l	935.449	-10.7335	0.782821	-13.7113	8.69147e-43	1.06759e-41
Vdr	979.5	-7.7435	0.564767	-13.711	8.72826e-43	1.07129e-41
Tmem43	754.54	2.58767	0.188847	13.7025	9.81304e-43	1.20351e-41
Zfp335	1785.38	2.18754	0.159726	13.6956	1.07896e-42	1.32227e-41
Rps10	7879.59	15.6177	1.14061	13.6923	1.12803e-42	1.38133e-41
Mina	296.296	7.50204	0.547934	13.6915	1.14142e-42	1.39666e-41
Pfn3	7554.55	-15.7127	1.14771	-13.6904	1.15821e-42	1.41613e-41
Nampt	609.453	7.51271	0.549225	13.6787	1.36044e-42	1.66213e-41
Zc3h11a	2227.46	7.45605	0.545204	13.6757	1.41792e-42	1.73102e-41
Tmed6	361.672	-8.4801	0.620238	-13.6723	1.4858e-42	1.81251e-41
Sncaip	388.17	-8.83069	0.646006	-13.6697	1.54105e-42	1.87848e-41
Nudt17	317.919	-4.90191	0.358617	-13.6689	1.55645e-42	1.89581e-41
Vnn3	656.224	-9.86385	0.722384	-13.6546	1.89581e-42	2.30741e-41
Gmfb	2239.69	-1.46756	0.10748	-13.6543	1.9041e-42	2.31574e-41
Sema4d	4559.02	3.62357	0.265382	13.6542	1.9059e-42	2.31617e-41
Zdhhc4	290.229	7.82134	0.573065	13.6483	2.06731e-42	2.51042e-41
Pik3ap1	250.165	6.62128	0.485265	13.6447	2.17205e-42	2.63561e-41
Tusc1	315.569	-3.66176	0.268377	-13.6441	2.1896e-42	2.65488e-41
Scnm1	259.337	7.47617	0.547983	13.6431	2.22029e-42	2.69006e-41
Xylt2	527.47	5.35252	0.392388	13.6409	2.28805e-42	2.77007e-41
Neat1	3320.34	2.5401	0.186263	13.6372	2.40558e-42	2.91015e-41
Noc2l	2988.88	2.63312	0.19311	13.6354	2.46709e-42	2.98231e-41
Trmt61b	495.914	-3.59746	0.263938	-13.6299	2.65841e-42	3.21115e-41
Scfd1	393.386	8.44069	0.619766	13.6192	3.08114e-42	3.71897e-41
Nkg7	5393.85	8.90058	0.653689	13.6159	3.22035e-42	3.88408e-41
Smg6	8027.82	-3.24519	0.238396	-13.6126	3.36997e-42	4.06148e-41
Tshz1	472.323	8.96168	0.658379	13.6117	3.40989e-42	4.1065e-41
Trim46	1495.8	-3.50351	0.257494	-13.6062	3.67896e-42	4.4272e-41
Notch3	1965.87	-12.2513	0.900704	-13.6019	3.90266e-42	4.69286e-41
Snai3	242.776	6.80875	0.500924	13.5924	4.44359e-42	5.33932e-41
Ufsp1	299.854	-5.65012	0.415699	-13.5919	4.47523e-42	5.3733e-41
Sash3	4379.07	2.52585	0.185847	13.591	4.5283e-42	5.43294e-41
Ms4a7	723.371	-10.0083	0.736461	-13.5897	4.60724e-42	5.52352e-41
Phlda2	241.414	-7.69842	0.566602	-13.587	4.78411e-42	5.73126e-41
Rab11b	777.758	2.57459	0.189544	13.5831	5.04496e-42	6.03923e-41
Tmem9b	545.441	4.00999	0.295253	13.5816	5.15217e-42	6.16296e-41
Pja1	874.728	6.99971	0.515587	13.5762	5.54363e-42	6.62627e-41
Zfp869	721.831	2.72951	0.20116	13.5688	6.13022e-42	7.32195e-41
Pvt1	202.451	6.54077	0.482331	13.5608	6.84317e-42	8.16741e-41
Snhg5	714.356	3.66747	0.270708	13.5477	8.17784e-42	9.75308e-41
Rnf181	601.993	2.39868	0.177082	13.5456	8.41023e-42	1.00228e-40
Rpl27a	7032.99	15.4594	1.1416	13.5419	8.85156e-42	1.05409e-40
Mustn1	175.512	-4.22511	0.312007	-13.5417	8.8675e-42	1.0552e-40
Rbmxl1	566.072	-2.30133	0.170024	-13.5353	9.6769e-42	1.15066e-40
Ppie	374.109	6.48441	0.479221	13.5312	1.024e-41	1.21671e-40
Pds5a	2091.29	2.27587	0.168341	13.5194	1.20177e-41	1.42688e-40
Phka2	1799.83	-2.44627	0.181082	-13.5092	1.3796e-41	1.63681e-40
Wwc1	792.046	-10.4995	0.777521	-13.5038	1.48543e-41	1.76106e-40
Mical3	2188.72	-3.95065	0.292599	-13.5019	1.5241e-41	1.80557e-40
Strada	442.49	8.8523	0.655763	13.4992	1.58011e-41	1.87054e-40
Timm9	190.778	5.7967	0.429589	13.4936	1.70574e-41	2.01671e-40
S1pr4	1591.63	3.34974	0.248247	13.4936	1.70611e-41	2.01671e-40
Mlh3	877.317	-2.83736	0.210305	-13.4916	1.75264e-41	2.07019e-40
Rbm41	212.179	4.43899	0.329174	13.4852	1.91037e-41	2.25483e-40
Txnip	10003.8	15.8976	1.17892	13.4848	1.92119e-41	2.26593e-40
a	1745.58	-12.0892	0.89655	-13.4841	1.93924e-41	2.28553e-40
Sf3b3	8935.05	-1.19384	0.0885846	-13.4769	2.14036e-41	2.52072e-40
Stbd1	487.788	-9.4469	0.701213	-13.4722	2.27884e-41	2.68182e-40
Sry	303.349	-8.23655	0.612161	-13.4549	2.88205e-41	3.38922e-40
Ppap2b	402.257	-6.39356	0.475199	-13.4545	2.89701e-41	3.40431e-40
Oit1	5660.95	-15.3248	1.13907	-13.4538	2.9247e-41	3.43432e-40
Ppp1r15a	7875.52	15.5932	1.15935	13.45	3.07829e-41	3.61203e-40
Osbp2	1961.52	-12.2385	0.911023	-13.4338	3.83137e-41	4.49238e-40
Wdr86	152.068	-6.16295	0.458876	-13.4305	4.00508e-41	4.69263e-40
Yes1	1304.98	-3.17455	0.236402	-13.4286	4.11059e-41	4.81272e-40
Sigirr	5399.15	-2.93388	0.218574	-13.4228	4.44313e-41	5.19826e-40
Polrmt	653.082	2.61743	0.195034	13.4204	4.59351e-41	5.37028e-40
Zbtb44	697.371	2.19235	0.163386	13.4182	4.72751e-41	5.52291e-40
Prrc2a	6172.01	15.2811	1.13984	13.4064	5.54692e-41	6.47545e-40
Slc15a1	483.91	-7.91624	0.590597	-13.4038	5.74362e-41	6.70019e-40
Smim14	572.755	2.05774	0.153546	13.4014	5.93312e-41	6.91621e-40
Misp	316.578	-8.29651	0.619101	-13.4009	5.97336e-41	6.95805e-40
Slco4c1	1517.69	-7.30342	0.545089	-13.3986	6.16376e-41	7.17462e-40
Slc25a45	436.067	6.24282	0.465955	13.3979	6.21952e-41	7.23426e-40
Rab30	1394.16	-6.68618	0.499079	-13.397	6.29254e-41	7.31388e-40
Msto1	211.428	6.5904	0.491946	13.3966	6.33134e-41	7.35364e-40
Zfp28	473.487	-3.12678	0.233459	-13.3933	6.62149e-41	7.68506e-40
Rn45s	7368.39	15.5029	1.1582	13.3853	7.36851e-41	8.54587e-40
Tcf19	1917.82	-2.85445	0.213323	-13.3809	7.82018e-41	9.06314e-40
Msantd2	211.241	6.18071	0.461978	13.3788	8.04498e-41	9.31693e-40
Rplp2-ps1	5979.23	-15.3853	1.15109	-13.3659	9.56245e-41	1.10663e-39
Spata7	144.149	-5.46451	0.408985	-13.3612	1.01976e-40	1.17928e-39
N28178	451.716	-9.34363	0.699351	-13.3604	1.02969e-40	1.1899e-39
Orm2	224.325	-4.00814	0.300039	-13.3587	1.05366e-40	1.21673e-39
Rnf115	764.913	2.03903	0.152722	13.3513	1.16447e-40	1.34372e-39
Zfp36	12136.9	6.85375	0.513438	13.3487	1.20485e-40	1.38931e-39
Shkbp1	572.605	9.51062	0.712489	13.3484	1.20952e-40	1.3937e-39
Satl1	5373.52	-15.2479	1.14306	-13.3395	1.36348e-40	1.56996e-39
Rrp12	1272.38	1.83887	0.138035	13.3218	1.72925e-40	1.98969e-39
Nrip3	275.347	-6.22985	0.468189	-13.3063	2.12886e-40	2.44773e-39
Pus1	3600.05	-2.31273	0.173843	-13.3035	2.20743e-40	2.53624e-39
S100a13	3373.57	-2.37311	0.178385	-13.3033	2.2155e-40	2.54369e-39
Phax	297.872	8.043	0.604924	13.2959	2.4455e-40	2.80575e-39
Slc35e2	337.439	7.67702	0.577444	13.2948	2.48042e-40	2.84377e-39
Tomt	301.078	-4.05302	0.304947	-13.2909	2.61342e-40	2.99412e-39
Mavs	2977.37	-2.7823	0.209438	-13.2846	2.84252e-40	3.25426e-39
Ppia	4088.57	7.78013	0.586013	13.2764	3.17315e-40	3.63019e-39
Xpnpep2	283.393	-7.91585	0.596508	-13.2703	3.44106e-40	3.93387e-39
Ptplad1	523.864	3.5257	0.265762	13.2664	3.62688e-40	4.14334e-39
Mtrr	344.82	3.4009	0.25638	13.2651	3.68978e-40	4.21219e-39
Zyx	5882.21	15.2065	1.14648	13.2637	3.76021e-40	4.28953e-39
Poln	153.586	-3.96375	0.298887	-13.2617	3.86022e-40	4.40049e-39
Mis18bp1	427.376	-3.10387	0.234082	-13.2597	3.96278e-40	4.51419e-39
Peli1	2303.88	12.2833	0.926474	13.2581	4.05094e-40	4.61133e-39
Tssk1	266.143	-8.03929	0.60641	-13.2572	4.0997e-40	4.66352e-39
Plec	5877.07	14.3044	1.07914	13.2554	4.20149e-40	4.77592e-39
Snta1	292.21	-6.87951	0.519241	-13.2492	4.56313e-40	5.18331e-39
Pbk	736.263	-4.88694	0.368922	-13.2465	4.72563e-40	5.3641e-39
S100a4	717.342	9.83846	0.743092	13.2399	5.16223e-40	5.85552e-39
Slc8b1	266.59	7.14511	0.53973	13.2383	5.27244e-40	5.9763e-39
Rnf31	1320.82	2.25701	0.170652	13.2258	6.22435e-40	7.0503e-39
Vcpkmt	2271.82	-4.93529	0.373195	-13.2244	6.34157e-40	7.17799e-39
Psph	283.204	7.7609	0.587125	13.2185	6.86356e-40	7.75948e-39
Slk	1597.87	6.48326	0.49047	13.2185	6.865e-40	7.75948e-39
Trerf1	1665.33	-3.62951	0.274701	-13.2126	7.42137e-40	8.38243e-39
Pfdn1	267.848	4.66082	0.352821	13.2102	7.66531e-40	8.65186e-39
Psme1	4001.21	1.99841	0.1513	13.2083	7.85706e-40	8.86203e-39
Slc39a8	447.313	-2.94984	0.223334	-13.2082	7.86965e-40	8.86998e-39
Rab18	552.404	9.45697	0.716195	13.2045	8.26931e-40	9.31389e-39
Ttc39b	1651.4	2.22087	0.168194	13.2042	8.29347e-40	9.33452e-39
Rasd2	5762.98	-14.4346	1.09322	-13.2037	8.34845e-40	9.38981e-39
Srgap2	843.69	2.25867	0.171149	13.1971	9.1163e-40	1.02462e-38
Ranbp1	795.166	10.3452	0.784622	13.1849	1.07142e-39	1.20338e-38
Prr24	194.483	3.95049	0.299792	13.1774	1.18395e-39	1.32883e-38
Tmem129	2056.84	-3.55322	0.26966	-13.1766	1.19615e-39	1.34158e-38
Rptn	6327.35	-15.4375	1.17161	-13.1763	1.2016e-39	1.34675e-38
U90926	1445.98	-11.827	0.897808	-13.1732	1.25255e-39	1.40288e-38
Mcfd2	258.403	7.6294	0.579322	13.1695	1.31425e-39	1.47095e-38
Pfkp	3074.5	1.82763	0.13878	13.1692	1.31919e-39	1.47545e-38
Tmem121	147.911	-6.01652	0.456974	-13.166	1.37663e-39	1.53861e-38
Mx2	573.555	-4.66841	0.354765	-13.1592	1.50758e-39	1.68379e-38
Mcl1	7076.87	15.4286	1.17277	13.1558	1.57679e-39	1.75987e-38
Tm7sf3	222.641	4.57896	0.348138	13.1527	1.64186e-39	1.83122e-38
Rom1	1113.55	-1.98313	0.150818	-13.1491	1.72104e-39	1.9182e-38
Ppap2a	142.524	-5.77521	0.439375	-13.1442	1.83813e-39	2.04727e-38
Ston1	578.328	-7.42692	0.565077	-13.1432	1.86151e-39	2.07187e-38
Mtfr1l	591.86	4.97568	0.378618	13.1417	1.89991e-39	2.11314e-38
Sun5	4600.03	-15.0321	1.14391	-13.141	1.91719e-39	2.13088e-38
Pqbp1	887.06	2.34756	0.178678	13.1385	1.98017e-39	2.19935e-38
Msl3	1730.17	-2.09596	0.15959	-13.1334	2.11896e-39	2.35187e-38
Nek7	812.356	10.3905	0.791199	13.1326	2.14271e-39	2.37658e-38
Pls1	313.62	-8.52502	0.649354	-13.1285	2.26209e-39	2.50725e-38
Mtmr9	1360.84	-2.52382	0.192317	-13.1232	2.42428e-39	2.68516e-38
Zfp800	422.524	8.06782	0.614962	13.1192	2.5554e-39	2.82843e-38
Tmem56	817.941	-9.58484	0.730694	-13.1175	2.61557e-39	2.89304e-38
Nrcam	1526.55	-11.8958	0.907005	-13.1155	2.68366e-39	2.9663e-38
Rassf2	2488.25	2.33248	0.177882	13.1125	2.79316e-39	3.0852e-38
Zfp507	618.691	3.38695	0.258302	13.1124	2.79638e-39	3.08663e-38
Stx5a	1029.83	3.0964	0.23615	13.112	2.81126e-39	3.10091e-38
Taok2	2146.07	2.33984	0.178521	13.1068	3.01163e-39	3.31963e-38
Zfand2a	1438.52	10.1895	0.777937	13.098	3.37844e-39	3.7214e-38
Tmem63c	651.612	-10.2265	0.781042	-13.0934	3.58997e-39	3.95168e-38
Oaz1	173.954	-6.05453	0.462606	-13.0879	3.86289e-39	4.24917e-38
Scaf11	2074.24	2.30324	0.176017	13.0853	3.99479e-39	4.39126e-38
Tceanc2	285.403	4.4444	0.339656	13.085	4.01184e-39	4.40696e-38
Me1	4717.06	-15.0584	1.15084	-13.0847	4.02587e-39	4.41934e-38
Ucp2	4943.49	14.9693	1.14408	13.0841	4.06078e-39	4.45461e-38
Rec8	139.365	-4.81779	0.368319	-13.0805	4.25756e-39	4.66728e-38
Prpf4	1943.97	-1.6193	0.123812	-13.0787	4.35964e-39	4.77591e-38
Tspan14	756.956	10.2854	0.78721	13.0656	5.17792e-39	5.66844e-38
Prkacb	2213.36	3.82569	0.292933	13.0599	5.57741e-39	6.10161e-38
Wipf3	4843.6	-15.0893	1.15544	-13.0594	5.61715e-39	6.14088e-38
Ogdhl	226.382	-7.59284	0.582109	-13.0437	6.90416e-39	7.54273e-38
Srsf10	2470.02	-1.55074	0.118903	-13.042	7.0572e-39	7.70467e-38
Serinc1	1171.03	3.88703	0.298097	13.0395	7.29624e-39	7.96021e-38
Prkdc	2863.97	-1.26924	0.0974142	-13.0293	8.34061e-39	9.09343e-38
Prkg1	1349.1	-11.7306	0.900848	-13.0217	9.21324e-39	1.0038e-37
Tex22	234.168	-7.86445	0.604093	-13.0186	9.58821e-39	1.04394e-37
Ywhab	2654.85	2.8248	0.21699	13.0181	9.65047e-39	1.05001e-37
Rchy1	680.078	2.30927	0.177396	13.0176	9.71186e-39	1.05597e-37
Vipr2	407.322	-9.19475	0.706438	-13.0156	9.97049e-39	1.08335e-37
Ptpn22	4971.79	14.969	1.15085	13.0069	1.11727e-38	1.21316e-37
Tuft1	619.63	-3.83794	0.295103	-13.0054	1.13983e-38	1.23681e-37
Wif1	3999.53	-14.841	1.14215	-12.9939	1.32447e-38	1.43619e-37
Myo9b	4303.41	14.7844	1.13848	12.986	1.46851e-38	1.5913e-37
Psma7	1453.91	1.72821	0.133088	12.9855	1.47946e-38	1.602e-37
Ssmem1	5305.21	-15.1963	1.17026	-12.9854	1.48038e-38	1.602e-37
Parp12	1098.46	-2.58813	0.199585	-12.9676	1.86782e-38	2.01989e-37
Znrf1	1066.17	1.97724	0.152544	12.9618	2.01536e-38	2.17798e-37
Trp53bp1	747.517	2.75062	0.212266	12.9584	2.10586e-38	2.27424e-37
Tprg	3742.18	-14.7529	1.13893	-12.9534	2.24809e-38	2.42621e-37
Tnfaip3	22607.4	6.18316	0.477843	12.9397	2.68591e-38	2.89676e-37
Rps29	4285.36	14.774	1.14231	12.9334	2.91555e-38	3.14232e-37
Plcb2	2559.65	2.6698	0.206517	12.9277	3.13969e-38	3.38161e-37
Mrps11	638.845	-2.21017	0.171002	-12.9248	3.26001e-38	3.50884e-37
Vash2	378.919	-9.08923	0.703386	-12.9221	3.37781e-38	3.63318e-37
Spns1	6872.56	-3.22023	0.24942	-12.9109	3.90828e-38	4.20094e-37
Mxra8	305.247	-5.22905	0.40504	-12.91	3.95519e-38	4.24851e-37
Rpgr	430.035	-2.50115	0.193788	-12.9067	4.12804e-38	4.4312e-37
Zfp236	1006.12	6.96735	0.539877	12.9054	4.1939e-38	4.49889e-37
Rnf135	583.524	-3.12214	0.242032	-12.8997	4.52101e-38	4.84654e-37
Rpl26	4622.45	-15.0138	1.16425	-12.8957	4.7605e-38	5.09985e-37
Nacad	281.702	-3.77524	0.29288	-12.89	5.12211e-38	5.48357e-37
Uhrf2	959.075	2.31892	0.179939	12.8873	5.30937e-38	5.68024e-37
Wls	239.629	7.21209	0.559873	12.8817	5.70974e-38	6.1045e-37
Rbbp8nl	1276.82	-11.6455	0.904075	-12.8811	5.75099e-38	6.1445e-37
Rnf207	579.903	-10.0576	0.78089	-12.8796	5.8622e-38	6.25914e-37
Rnf187	1517.08	2.69734	0.209491	12.8757	6.16985e-38	6.58323e-37
Tmem39a	207.196	3.65044	0.283542	12.8744	6.2717e-38	6.68745e-37
Nlrc5	8249.85	2.25056	0.174868	12.87	6.63638e-38	7.07159e-37
Rps6kl1	280.292	-4.34186	0.337683	-12.8578	7.7772e-38	8.28171e-37
Snap23	319.204	8.38899	0.652648	12.8538	8.19101e-38	8.71657e-37
Rif1	1338.84	1.99185	0.154995	12.8511	8.4813e-38	9.01948e-37
Zfp811	125.182	-5.11256	0.39784	-12.8508	8.51387e-38	9.0481e-37
Stamos	207.359	-7.11489	0.55369	-12.85	8.60637e-38	9.14035e-37
Upk1b	226.912	-7.82505	0.609112	-12.8467	8.98145e-38	9.53237e-37
Prx	285.914	-4.29993	0.334826	-12.8423	9.50168e-38	1.00778e-36
Rps6kc1	954.936	-2.67488	0.208311	-12.8408	9.69211e-38	1.0273e-36
Poc1a	1939.51	-5.28096	0.411409	-12.8363	1.02699e-37	1.08782e-36
Scarf1	219.437	-4.31091	0.335928	-12.8328	1.07376e-37	1.13661e-36
Nol6	1357.6	11.5844	0.903793	12.8175	1.30804e-37	1.38346e-36
Otud4	2322.87	3.30164	0.257589	12.8175	1.30869e-37	1.38346e-36
Spin2c	629.027	-3.64525	0.284459	-12.8147	1.35711e-37	1.4337e-36
Sez6l	3518.75	-14.6613	1.14451	-12.8101	1.43954e-37	1.51978e-36
Tmem168	917.553	-1.93631	0.151156	-12.81	1.44091e-37	1.52022e-36
Nans	632.069	10.0325	0.783236	12.809	1.45942e-37	1.53874e-36
Tmem131	1548.41	2.32977	0.181929	12.8059	1.51908e-37	1.60059e-36
Trabd2b	671.368	-6.75447	0.527465	-12.8055	1.52664e-37	1.60749e-36
Sec63	1058.39	2.15382	0.168244	12.8018	1.60175e-37	1.68547e-36
Rab17	1188.48	-11.5469	0.902063	-12.8005	1.62855e-37	1.71254e-36
Mia3	1279.82	11.5007	0.899222	12.7896	1.8747e-37	1.9701e-36
Sdc1	687.141	-6.72621	0.52598	-12.788	1.9145e-37	2.0106e-36
Rps6ka2	3132.63	-6.4926	0.507871	-12.784	2.01539e-37	2.11517e-36
Mpzl1	135.323	-5.68838	0.44499	-12.7831	2.03654e-37	2.13596e-36
Stard7	961.49	3.1074	0.243166	12.7789	2.15002e-37	2.25351e-36
Top2b	2561.35	5.28978	0.41395	12.7788	2.15377e-37	2.25596e-36
Neurl3	2271.32	5.5187	0.431897	12.7778	2.18087e-37	2.28286e-36
Myo3a	3229.49	-14.5496	1.13867	-12.7777	2.18432e-37	2.28497e-36
Srek1ip1	1651.47	-4.38113	0.342927	-12.7757	2.24168e-37	2.34344e-36
Tm7sf2	992.034	-3.90956	0.30603	-12.7751	2.25931e-37	2.36033e-36
Smim1	351.138	-8.98379	0.703301	-12.7738	2.2978e-37	2.39898e-36
Plcb3	256.95	6.24775	0.489426	12.7655	2.55636e-37	2.66718e-36
Tmem81	595.801	-2.29806	0.180032	-12.7647	2.58069e-37	2.69081e-36
Sptan1	3731.4	14.5825	1.14252	12.7634	2.62453e-37	2.73474e-36
Nid1	770.807	-7.46336	0.584763	-12.7631	2.63637e-37	2.74529e-36
Rpl18	11140.7	2.90995	0.228008	12.7625	2.65606e-37	2.76399e-36
Srcin1	283.793	-8.12372	0.636748	-12.7581	2.80814e-37	2.92036e-36
Prickle3	285.517	6.72738	0.527468	12.7541	2.95792e-37	3.07412e-36
Rab22a	297.953	2.6117	0.204815	12.7515	3.05673e-37	3.17475e-36
Nim1k	161.039	-4.3892	0.344216	-12.7513	3.06686e-37	3.18321e-36
Rimbp3	212.285	-7.72674	0.606355	-12.7429	3.41351e-37	3.54072e-36
Spata17	4791.69	-14.1576	1.11147	-12.7377	3.64988e-37	3.78344e-36
Slc38a4	3856.6	-14.7691	1.16022	-12.7295	4.05351e-37	4.19912e-36
Rpl35a	3652.67	14.5522	1.14321	12.7292	4.06988e-37	4.21335e-36
Rock2	633.886	10.0306	0.788028	12.7288	4.09105e-37	4.23253e-36
Sos1	4011.67	-2.6849	0.210999	-12.7247	4.31124e-37	4.45745e-36
Pex11a	173.714	-7.04071	0.553336	-12.7241	4.34287e-37	4.48726e-36
Zscan26	891.095	2.76774	0.217574	12.7209	4.52544e-37	4.67288e-36
Tulp4	224.905	6.95454	0.546838	12.7177	4.7136e-37	4.86403e-36
Sh3glb2	677.486	10.1097	0.795149	12.7142	4.93081e-37	5.08489e-36
Peo1	258.847	4.99295	0.39272	12.7138	4.95864e-37	5.11031e-36
Tpr	3541.18	14.5111	1.14172	12.7098	5.21456e-37	5.3706e-36
Sos2	908.071	3.74729	0.294835	12.7098	5.21824e-37	5.37093e-36
Ptrh2	147.047	5.74282	0.451861	12.7093	5.25244e-37	5.40265e-36
Spdef	1095.14	-11.4387	0.900318	-12.7051	5.53762e-37	5.69233e-36
Ran	1309.5	11.5268	0.907592	12.7004	5.88217e-37	6.04263e-36
2017-08-31	7925.8	2.19751	0.173078	12.6967	6.16714e-37	6.33131e-36
Sorl1	3435.74	14.4714	1.14001	12.6941	6.37412e-37	6.5396e-36
Phex	602.452	-10.1002	0.795892	-12.6904	6.6865e-37	6.8557e-36
Wbp1l	1250.93	2.54784	0.20078	12.6897	6.74527e-37	6.91152e-36
Zgpat	1281.09	11.4939	0.905838	12.6887	6.83389e-37	6.99785e-36
Rpl34-ps1	3673.62	-14.7033	1.15897	-12.6864	7.03008e-37	7.19415e-36
Mlxipl	546.134	-9.97146	0.786129	-12.6842	7.23048e-37	7.39449e-36
Rnf111	1239.89	2.07653	0.163734	12.6823	7.41386e-37	7.57719e-36
Tmem150b	526.009	-7.13957	0.563141	-12.6781	7.81862e-37	7.98577e-36
Pctp	832.847	-2.36921	0.186989	-12.6703	8.63853e-37	8.81758e-36
Zbtb32	293.481	-3.87052	0.305498	-12.6696	8.72014e-37	8.89521e-36
Nxf3	3090.96	-14.4834	1.14331	-12.668	8.89193e-37	9.06467e-36
Mta2	3313.17	14.4224	1.13893	12.6632	9.45823e-37	9.63584e-36
Pnpla2	829.437	6.55794	0.518688	12.6433	1.21808e-36	1.24016e-35
Rad51	1699.19	-4.65561	0.368415	-12.6369	1.32219e-36	1.34531e-35
Mfsd6l	416.597	-7.46971	0.591107	-12.6368	1.32309e-36	1.34536e-35
Plcd1	182.896	-3.71911	0.294325	-12.6361	1.33594e-36	1.35757e-35
Myocd	2940.84	-14.4172	1.14126	-12.6327	1.39377e-36	1.41544e-35
Zfp37	6888.53	-15.4831	1.226	-12.629	1.46146e-36	1.48324e-35
Vps41	579.75	9.90634	0.78499	12.6197	1.64449e-36	1.66794e-35
P2ry13	2414.18	-8.19291	0.64926	-12.6189	1.66222e-36	1.68485e-35
Rorc	224.04	-4.82673	0.382586	-12.6161	1.72226e-36	1.74461e-35
Nisch	3220.36	14.3819	1.14008	12.6148	1.74926e-36	1.77084e-35
Stk17b	7601.26	3.94293	0.312682	12.61	1.85922e-36	1.88097e-35
Mycl	4669.53	-8.61167	0.68295	-12.6095	1.87122e-36	1.89191e-35
Ric8b	375.955	8.91792	0.707285	12.6087	1.89178e-36	1.91149e-35
Prpsap2	1116.11	-1.89235	0.150156	-12.6026	2.04361e-36	2.06359e-35
Nbl1	251.357	-7.95218	0.631077	-12.601	2.08593e-36	2.105e-35
Nosip	580.121	9.90654	0.786489	12.5959	2.22405e-36	2.24297e-35
Rell2	385.133	-2.52638	0.200666	-12.5899	2.39844e-36	2.41732e-35
Rnf220	1132.18	11.3312	0.900465	12.5837	2.59567e-36	2.61446e-35
Zyg11b	1494.22	1.48156	0.117767	12.5805	2.70375e-36	2.7216e-35
Pp2d1	1302.23	-11.6587	0.926767	-12.5799	2.72311e-36	2.73937e-35
R3hdm1	1059.47	2.57052	0.20434	12.5796	2.7338e-36	2.74839e-35
Zfp52	756.112	-1.75644	0.139628	-12.5794	2.74028e-36	2.75318e-35
Twf2	1546.39	2.67981	0.213036	12.5792	2.74902e-36	2.76023e-35
Mkrn3	1359.98	-11.7085	0.930904	-12.5776	2.80586e-36	2.81554e-35
Prdm5	1312.75	-11.6685	0.927776	-12.5768	2.83238e-36	2.84036e-35
Tcf25	3397.53	13.553	1.07785	12.5741	2.93265e-36	2.93908e-35
Ppm1l	940.402	-4.50533	0.358393	-12.5709	3.05189e-36	3.05666e-35
Sp100	3360.41	14.4314	1.14804	12.5705	3.06934e-36	3.07222e-35
Ptk2b	3142.64	14.3462	1.14166	12.5661	3.24129e-36	3.24231e-35
Wwtr1	2874.91	-12.666	1.00798	-12.5658	3.25453e-36	3.25351e-35
Zfp746	785.456	2.54485	0.20254	12.5647	3.30231e-36	3.29922e-35
Uts2b	3024.22	-14.4455	1.14998	-12.5616	3.43388e-36	3.42853e-35
Racgap1	12124.6	-2.42631	0.193167	-12.5607	3.47194e-36	3.46437e-35
Stim1	1122.29	11.3156	0.900906	12.5603	3.49202e-36	3.48222e-35
Mppe1	1058.12	2.55507	0.203454	12.5585	3.57179e-36	3.55956e-35
Slc38a10	1534.85	2.28263	0.181766	12.5581	3.58826e-36	3.57375e-35
Ppp6r3	5879.65	-2.08429	0.16599	-12.5567	3.65091e-36	3.63389e-35
Tyk2	1665.63	3.72766	0.296887	12.5558	3.69204e-36	3.67254e-35
Naaladl1	394.24	-7.12031	0.567221	-12.553	3.82894e-36	3.80635e-35
Tmeff2	1044.08	-11.3636	0.905263	-12.5528	3.83562e-36	3.81062e-35
Mfap3	350.965	2.96606	0.236392	12.5472	4.11935e-36	4.08996e-35
Slc30a5	555.942	9.84998	0.785071	12.5466	4.14937e-36	4.11721e-35
Pitpnm2os1	3233.07	-14.5283	1.15808	-12.5452	4.22442e-36	4.18908e-35
Mtag2	2711.5	-14.3059	1.14048	-12.5437	4.30386e-36	4.26522e-35
Rnf215	251.86	7.03418	0.560827	12.5425	4.36979e-36	4.32788e-35
Zfp689	622.793	-2.86566	0.228663	-12.5322	4.97349e-36	4.92274e-35
Six1	625.442	-9.4449	0.753717	-12.5311	5.04628e-36	4.9917e-35
Nubpl	371.36	-3.25872	0.260289	-12.5196	5.83258e-36	5.76593e-35
Rnf11	2224.06	-2.79503	0.223254	-12.5195	5.83771e-36	5.76744e-35
Slc20a1	3275.83	14.3939	1.14997	12.5168	6.04373e-36	5.96729e-35
Pllp	246.395	-6.11416	0.488738	-12.5101	6.57468e-36	6.48753e-35
Nkx1-2	2656.72	-14.2767	1.14142	-12.5078	6.7661e-36	6.6723e-35
Rps19	8382.65	2.25611	0.180393	12.5066	6.86777e-36	6.76839e-35
Zfp943	138.927	5.57939	0.446326	12.5007	7.39984e-36	7.28827e-35
Smc2	2512.91	-2.62756	0.210352	-12.4913	8.33247e-36	8.2018e-35
Spata21	345.157	-8.94531	0.716908	-12.4776	9.88785e-36	9.7268e-35
Nodal	2893.18	-14.3814	1.15267	-12.4767	1.00088e-35	9.83976e-35
Msh4	1004.08	-11.3139	0.906831	-12.4763	1.00558e-35	9.87989e-35
Slc25a31	2525.88	-14.2096	1.13896	-12.4759	1.01007e-35	9.91786e-35
Ube2dnl2	2507.61	-14.1993	1.13926	-12.4635	1.18011e-35	1.15804e-34
Sgk1	3004.03	14.2789	1.14606	12.4592	1.24669e-35	1.22263e-34
Napg	555.524	4.1979	0.337078	12.4538	1.33358e-35	1.30703e-34
Xpo5	2645.46	-1.74011	0.139739	-12.4526	1.35421e-35	1.32645e-34
Tpo	2840.45	-14.355	1.1535	-12.4448	1.49227e-35	1.46078e-34
Mllt6	5147.66	3.52082	0.282944	12.4435	1.51664e-35	1.48373e-34
Mtf2	536.146	2.39973	0.192943	12.4375	1.63568e-35	1.59921e-34
Zfp60	957.626	-2.89551	0.23291	-12.4319	1.75458e-35	1.71442e-34
Nipsnap3a	2536.6	-14.2106	1.14317	-12.4309	1.77712e-35	1.73537e-34
Srsf12	575.639	-4.12933	0.332205	-12.4301	1.79496e-35	1.75172e-34
Sbp	2408.04	-14.1443	1.13837	-12.425	1.91125e-35	1.86408e-34
2017-09-06	1315.51	7.71611	0.621066	12.424	1.93679e-35	1.88669e-34
Rad51d	363.155	3.76163	0.302771	12.424	1.93596e-35	1.88669e-34
Pced1b	611.367	9.9649	0.802213	12.4218	1.99102e-35	1.93834e-34
Sec24d	1342.59	-2.3476	0.189005	-12.4209	2.01357e-35	1.9591e-34
Syngr2	737.881	4.12205	0.332	12.4158	2.14488e-35	2.08559e-34
Tecpr1	3178.52	13.4546	1.08422	12.4095	2.32005e-35	2.25455e-34
Pycard	525.9	9.77066	0.78791	12.4007	2.58942e-35	2.51478e-34
Tspan1	983.977	-11.2837	0.91028	-12.3958	2.75292e-35	2.67195e-34
Sbk3	1056.01	-11.3731	0.917834	-12.3912	2.91668e-35	2.82918e-34
Prkcsh	1197.79	2.96084	0.238972	12.3899	2.96303e-35	2.8715e-34
Sst	2441.55	-14.1584	1.14274	-12.3899	2.9639e-35	2.8715e-34
Sh2d4a	2350.14	-14.1101	1.13891	-12.3891	2.99391e-35	2.89882e-34
Rfc3	875.33	-2.87355	0.231999	-12.3861	3.10956e-35	3.00898e-34
Snord22	263.64	7.88029	0.63639	12.3828	3.23879e-35	3.13213e-34
Rhot2	1338.74	1.66775	0.13469	12.3821	3.26589e-35	3.15643e-34
Tmem30c	2394.46	-14.133	1.14152	-12.3809	3.3178e-35	3.20467e-34
Ppp1r1b	2422.89	-14.1477	1.14292	-12.3786	3.41293e-35	3.29457e-34
Spg7	1058.6	2.00303	0.16183	12.3774	3.46557e-35	3.34336e-34
Rab5c	2274.87	2.05623	0.166163	12.3748	3.57914e-35	3.45085e-34
Tmem242	158.844	5.85233	0.473169	12.3684	3.87604e-35	3.73486e-34
Tmem241	131.91	5.79913	0.468952	12.3662	3.98388e-35	3.83647e-34
Zfp583	146.291	-4.98908	0.403568	-12.3624	4.17349e-35	4.01664e-34
Snrnp25	836.613	-2.59468	0.209934	-12.3595	4.32861e-35	4.16343e-34
Szrd1	990.533	11.141	0.90153	12.3578	4.41882e-35	4.24764e-34
2017-03-04	503.156	3.22015	0.260783	12.348	4.99226e-35	4.79599e-34
Nfic	403.176	4.0905	0.331311	12.3464	5.09412e-35	4.89091e-34
Sim1	1004.12	-11.3043	0.915609	-12.3462	5.10411e-35	4.89756e-34
Slamf9	1005.57	-7.72033	0.625326	-12.3461	5.11284e-35	4.903e-34
Smim18	476.047	-9.7785	0.792039	-12.346	5.12045e-35	4.90736e-34
Oxct2a	452.402	-9.7061	0.786232	-12.3451	5.17803e-35	4.95957e-34
Myc	2881.63	14.215	1.15164	12.3433	5.29571e-35	5.06925e-34
Srrt	2589.51	14.0796	1.14096	12.3401	5.5093e-35	5.27055e-34
Rpl10l	2910.63	-14.3745	1.16533	-12.3352	5.85583e-35	5.59872e-34
Rpp14	1779.72	-2.71991	0.220585	-12.3304	6.21391e-35	5.93753e-34
Ostn	2444.63	-14.1542	1.14802	-12.3293	6.30299e-35	6.01906e-34
Pitpnm3	1037.8	-11.3424	0.92027	-12.3251	6.63852e-35	6.33569e-34
Tssk2	135.527	-6.36169	0.516234	-12.3233	6.78808e-35	6.47457e-34
Thtpa	435.609	8.79176	0.713725	12.3181	7.23524e-35	6.89697e-34
Rpl36a	5732.29	1.5462	0.125541	12.3163	7.40096e-35	7.05074e-34
St6galnac4	576.449	6.57375	0.533821	12.3145	7.5673e-35	7.20492e-34
Rbakdn	905.171	-11.1656	0.906822	-12.3129	7.71913e-35	7.34511e-34
Rhbdl3	130.656	-4.92461	0.399968	-12.3125	7.75697e-35	7.37673e-34
Rnf122	806.07	-2.07122	0.168264	-12.3094	8.06408e-35	7.66423e-34
Pisd-ps1	2473.02	14.0177	1.13944	12.3022	8.80965e-35	8.36786e-34
Nup210	6951.82	2.47379	0.201162	12.2975	9.34216e-35	8.8684e-34
Nme3	980.284	-2.6906	0.218813	-12.2963	9.48097e-35	8.99484e-34
Ubxn2a	333.919	8.76564	0.713319	12.2885	1.04401e-34	9.89893e-34
Zan	551.247	-9.9713	0.811453	-12.2882	1.04809e-34	9.93171e-34
Ppp1r27	473.49	-9.76597	0.794769	-12.2878	1.05317e-34	9.97397e-34
Pah	2349.21	-14.099	1.1482	-12.2793	1.16995e-34	1.10734e-33
Ubr2	2516.45	14.0373	1.14336	12.2773	1.19933e-34	1.13447e-33
Sf3b5	2459.05	-2.19933	0.179178	-12.2746	1.24057e-34	1.17279e-33
Phf10	252.04	8.04612	0.655552	12.2738	1.25212e-34	1.18301e-33
Sfrp1	2454.83	-14.1534	1.15345	-12.2705	1.30462e-34	1.23189e-33
Usp19	2530.28	14.0431	1.1449	12.2659	1.38138e-34	1.30359e-33
Rbck1	2456.1	14.0049	1.14233	12.26	1.48546e-34	1.40099e-33
Smco2	2142.16	-13.9803	1.14043	-12.2588	1.50769e-34	1.42111e-33
Nsd1	2350.69	13.949	1.13815	12.2558	1.56309e-34	1.47247e-33
Mcpt1	165.76	-6.96815	0.568601	-12.2549	1.58166e-34	1.48909e-33
Mcmdc2	204.402	-7.44689	0.607682	-12.2546	1.58769e-34	1.49389e-33
Tspan17	607.041	-5.44025	0.443956	-12.254	1.59875e-34	1.50341e-33
Qser1	164.345	4.65473	0.380446	12.2349	2.02313e-34	1.90136e-33
Stx19	960.295	-10.698	0.874437	-12.2342	2.04061e-34	1.91667e-33
Trpc4ap	2367.32	13.9555	1.14106	12.2303	2.14056e-34	2.00936e-33
2017-09-13	2163.76	-13.9902	1.14402	-12.2289	2.17738e-34	2.04273e-33
Trappc1	1100.76	-2.41942	0.197909	-12.2249	2.28843e-34	2.14566e-33
Tmem184c	352.631	8.81736	0.721346	12.2235	2.32889e-34	2.18231e-33
Pisd-ps3	2201.57	-14.011	1.14678	-12.2177	2.50108e-34	2.34229e-33
Nme4	1356.21	-5.14515	0.421195	-12.2156	2.5664e-34	2.40206e-33
Smpd5	231.755	5.53912	0.453559	12.2126	2.66363e-34	2.49161e-33
Ptpn23	937.174	2.87064	0.235148	12.2078	2.82387e-34	2.63995e-33
Rab39	893.3	-6.81181	0.558026	-12.207	2.85322e-34	2.66584e-33
Nnt	165.476	4.32915	0.354754	12.2033	2.98644e-34	2.78868e-33
Rogdi	1863.31	-4.23258	0.347073	-12.1951	3.30282e-34	3.08231e-33
Npffr1	639.357	-10.155	0.832948	-12.1917	3.44299e-34	3.21125e-33
Smarca4	2237.93	13.8793	1.13975	12.1775	4.09808e-34	3.82002e-33
Tmprss11a	2138.9	-13.9702	1.14754	-12.174	4.27546e-34	3.98304e-33
Mthfd1l	1117.67	2.19118	0.180142	12.1637	4.85298e-34	4.51844e-33
Tktl2	2029.05	-13.9021	1.14315	-12.1612	5.0019e-34	4.65438e-33
Mau2	2300.07	13.9122	1.14416	12.1593	5.11939e-34	4.76095e-33
Sfr1	1110.82	3.42891	0.282001	12.1592	5.12539e-34	4.76376e-33
Snora15	262.464	-7.42598	0.610787	-12.158	5.19915e-34	4.82951e-33
Taf15	1657.37	3.01642	0.248114	12.1574	5.24059e-34	4.86517e-33
Slc6a6	1372.18	7.03546	0.578829	12.1546	5.41983e-34	5.02866e-33
Tmem201	455.639	9.56208	0.78673	12.1542	5.44878e-34	5.05259e-33
Tex101	2173.73	-13.9883	1.15106	-12.1526	5.55819e-34	5.15106e-33
Rps27rt	2308.76	-14.0641	1.15739	-12.1516	5.62594e-34	5.21083e-33
Pgd	1111.93	11.2923	0.929314	12.1512	5.6528e-34	5.23268e-33
Trub1	231.826	7.48822	0.61634	12.1495	5.77129e-34	5.33928e-33
Slc38a11	1929.46	-13.8363	1.13986	-12.1386	6.59749e-34	6.10011e-33
Mgat2	898.292	11.0023	0.906546	12.1365	6.76948e-34	6.25552e-33
Ogfr	1497.08	2.69603	0.22218	12.1344	6.94057e-34	6.40992e-33
Rgs20	816.599	-11.0172	0.907964	-12.1339	6.98298e-34	6.44536e-33
Osm	431.743	4.99602	0.411772	12.133	7.06268e-34	6.51517e-33
Sarnp	447.165	9.5363	0.786015	12.1325	7.10723e-34	6.55249e-33
Ptn	2166.17	-13.9821	1.15255	-12.1314	7.199e-34	6.63327e-33
Smc4	2525.09	13.1391	1.08316	12.1304	7.29138e-34	6.71453e-33
Nod2	389.167	-2.89474	0.238721	-12.126	7.69125e-34	7.07869e-33
Mfap2	174.195	-7.43486	0.613155	-12.1256	7.73141e-34	7.11157e-33
Polg2	623.27	-2.1592	0.178101	-12.1234	7.93619e-34	7.29573e-33
Trpc5os	1960.52	-13.8549	1.14289	-12.1227	8.00601e-34	7.35569e-33
Zar1l	2093.18	-13.9376	1.15001	-12.1196	8.32109e-34	7.6408e-33
Snx27	528.949	7.3559	0.607193	12.1146	8.84031e-34	8.11291e-33
Yars2	197.309	7.47004	0.616741	12.1121	9.11195e-34	8.3574e-33
Pla2g10	1934.9	-12.1641	1.00433	-12.1116	9.16419e-34	8.40051e-33
Rbfox1	1879.18	-13.8004	1.13944	-12.1116	9.17291e-34	8.40369e-33
Tmem223	171.185	3.10142	0.256076	12.1113	9.20071e-34	8.42434e-33
Srgap1	787.208	-10.9716	0.905915	-12.111	9.23494e-34	8.45085e-33
Skiv2l	2120.08	13.8043	1.13994	12.1097	9.38506e-34	8.58331e-33
Nudt5	950.519	-1.85836	0.153595	-12.0991	1.068e-33	9.76203e-33
Tmem192	254.287	8.06102	0.667156	12.0827	1.30426e-33	1.19148e-32
Pnoc	1834.58	-13.767	1.13961	-12.0804	1.34056e-33	1.22394e-32
Phyhip	218.06	-7.99468	0.661823	-12.0798	1.35067e-33	1.23247e-32
Yipf4	468.638	1.81069	0.149957	12.0748	1.43596e-33	1.30955e-32
St6galnac6	405.203	-3.03801	0.251602	-12.0746	1.43798e-33	1.31064e-32
Tcof1	2099.54	13.7886	1.14198	12.0743	1.4445e-33	1.31583e-32
Zfp598	1706.71	2.81102	0.232999	12.0645	1.62672e-33	1.48098e-32
Pbdc1	1002.06	-1.84204	0.152696	-12.0635	1.64673e-33	1.49834e-32
Parm1	501.496	-9.83419	0.815261	-12.0626	1.66398e-33	1.51318e-32
Slc9b1	757.156	-10.9151	0.905037	-12.0604	1.70917e-33	1.55339e-32
Tnrc6a	2119.29	13.7988	1.1445	12.0567	1.78897e-33	1.625e-32
Myl6	2017.13	13.7362	1.13934	12.0563	1.79733e-33	1.63167e-32
Tdgf1	128.699	-4.81288	0.399212	-12.056	1.80415e-33	1.63693e-32
Rpn2	2154.47	13.8192	1.14646	12.0538	1.85223e-33	1.6796e-32
Srsf1	2027.15	13.7415	1.14076	12.046	2.03667e-33	1.84581e-32
Rnpep	538.715	2.90341	0.241104	12.0421	2.13368e-33	1.93263e-32
Rasgrp1	2773.85	13.2453	1.10033	12.0376	2.25435e-33	2.04078e-32
Ogdh	2028.67	13.7415	1.1417	12.036	2.29776e-33	2.07889e-32
Neurod1	2187.66	-13.9848	1.16205	-12.0347	2.33584e-33	2.11215e-32
Prdx2	618.572	2.29179	0.190443	12.034	2.35502e-33	2.12829e-32
Trnau1ap	293.929	2.87838	0.239273	12.0297	2.48133e-33	2.24118e-32
Snrnp200	2463.51	13.0977	1.08904	12.0268	2.56905e-33	2.3191e-32
Tfdp2	175.972	7.06267	0.587346	12.0247	2.63449e-33	2.37683e-32
Plek	2033.86	13.7435	1.14304	12.0236	2.66989e-33	2.40742e-32
Siah1a	202.856	7.11923	0.592198	12.0217	2.73294e-33	2.46288e-32
Pde5a	280.75	-5.50519	0.458198	-12.0149	2.9687e-33	2.67384e-32
Rdh11	162.968	6.61944	0.551206	12.009	3.1862e-33	2.86812e-32
Ttc13	1246.01	1.78038	0.148305	12.0048	3.35193e-33	3.01561e-32
Mtif2	378.799	4.00137	0.333415	12.0012	3.50299e-33	3.14974e-32
Nptx2	2623.31	-13.3378	1.11156	-11.9992	3.58869e-33	3.22498e-32
Upf1	2092.81	13.7769	1.14853	11.9953	3.76058e-33	3.37756e-32
Mpst	287.85	8.5396	0.71194	11.9948	3.78218e-33	3.39506e-32
Syndig1l	1699.5	-13.6618	1.13907	-11.9937	3.83268e-33	3.43845e-32
Ptchd1	262.564	-8.56041	0.713751	-11.9935	3.84112e-33	3.4441e-32
Sv2b	1750.97	-13.6997	1.14233	-11.9927	3.87887e-33	3.47599e-32
Ppp1r37	927.495	1.87996	0.156799	11.9896	4.02901e-33	3.60853e-32
Slc4a4	732.988	-10.8678	0.906828	-11.9844	4.28808e-33	3.8384e-32
Prkcdbp	2474.3	-13.2634	1.10687	-11.9828	4.37465e-33	3.91371e-32
Xaf1	210.034	7.55705	0.630799	11.9801	4.51632e-33	4.03819e-32
Myl12a	2001.49	13.7189	1.14518	11.9797	4.54027e-33	4.05734e-32
Rap1gap2	5490.51	-2.72863	0.227857	-11.9752	4.792e-33	4.27991e-32
Sh2d3c	2140.77	13.8033	1.15286	11.973	4.91968e-33	4.39149e-32
Qars	1885.02	13.6424	1.13944	11.9729	4.9269e-33	4.39548e-32
Pitpna	1873.47	13.6345	1.13899	11.9707	5.05999e-33	4.51171e-32
Pvrl2	262.927	-6.82191	0.569934	-11.9697	5.12412e-33	4.56635e-32
Pde11a	397.401	-3.62237	0.302865	-11.9603	5.73209e-33	5.10529e-32
Pde10a	372.546	-9.43132	0.788715	-11.9578	5.90842e-33	5.25941e-32
Rcbtb1	886.399	10.9776	0.918099	11.9569	5.97294e-33	5.31389e-32
Ppp1r15b	2617.78	13.1736	1.10179	11.9566	5.99942e-33	5.33449e-32
Prpf19	1840.08	13.6103	1.13838	11.9559	6.05034e-33	5.37677e-32
Rnf148	2013.47	-13.8719	1.16068	-11.9516	6.37071e-33	5.65834e-32
Proser2	387.152	-9.48202	0.793412	-11.9509	6.41962e-33	5.69861e-32
Themis3	1718.39	-13.6718	1.14404	-11.9504	6.46116e-33	5.73231e-32
Txndc9	2652.79	-2.57965	0.215872	-11.9499	6.49645e-33	5.76042e-32
Slc1a7	2381.99	-13.2126	1.10567	-11.9499	6.50242e-33	5.76252e-32
Tac1	1870.85	-13.779	1.15324	-11.948	6.6468e-33	5.88722e-32
Zfp574	276.781	8.48142	0.709953	11.9464	6.77592e-33	5.99826e-32
Znrf4	1697.19	-13.6557	1.14312	-11.946	6.81083e-33	6.02583e-32
Rfc4	615.847	-2.22267	0.186075	-11.9451	6.89036e-33	6.09283e-32
Neo1	712.728	-10.834	0.907067	-11.944	6.98019e-33	6.16885e-32
Unc45b	1701.12	-13.6581	1.1436	-11.943	7.06145e-33	6.23722e-32
Supt6	2475.64	2.23682	0.187337	11.9401	7.31414e-33	6.45685e-32
Scfd2	286.144	8.53454	0.714971	11.9369	7.59902e-33	6.70465e-32
Myef2	126.201	5.85223	0.490456	11.9322	8.03974e-33	7.08959e-32
Tescl	1968.2	-13.8413	1.16001	-11.9321	8.05123e-33	7.09581e-32
Sema5a	459.057	-9.71599	0.814563	-11.9279	8.4718e-33	7.46236e-32
Snx10	1196.16	-1.66727	0.139792	-11.9268	8.58277e-33	7.55595e-32
Nfatc2ip	2361.25	-2.84729	0.238755	-11.9255	8.71131e-33	7.6649e-32
Shpk	1189.53	-2.69339	0.225857	-11.9252	8.74471e-33	7.69006e-32
Pafah1b1	1857.16	13.6179	1.14301	11.9141	9.99874e-33	8.78802e-32
Plekho2	945.674	3.02876	0.254255	11.9123	1.02166e-32	8.97456e-32
Tmem74	1721.93	-13.6704	1.14786	-11.9095	1.05613e-32	9.27228e-32
Ttk	513.181	-4.47454	0.375834	-11.9056	1.10631e-32	9.70747e-32
Syn2	1582.04	-13.5628	1.1392	-11.9055	1.10816e-32	9.71839e-32
Setd4	1925.81	-3.35818	0.282196	-11.9002	1.18117e-32	1.0353e-31
Nup133	315.429	2.43924	0.205045	11.8961	1.23965e-32	1.08597e-31
Mbd2	1780.87	13.5628	1.14044	11.8926	1.29324e-32	1.13229e-31
Tpst2	1903.41	13.647	1.14757	11.8921	1.30041e-32	1.13795e-31
Sec16a	1750.84	13.5408	1.13906	11.8877	1.37089e-32	1.19896e-31
Nap1l4	1841.44	13.6046	1.14447	11.8873	1.3783e-32	1.20479e-31
Myl3	1607.97	-13.5814	1.1426	-11.8864	1.39329e-32	1.21723e-31
Vcpip1	1227.62	1.8445	0.155188	11.8856	1.40633e-32	1.22795e-31
Rab9b	1569.43	-13.5504	1.14015	-11.8848	1.41908e-32	1.23841e-31
Tppp2	1697.49	-13.6496	1.14887	-11.8809	1.48692e-32	1.2969e-31
Rps27l	194.814	3.31863	0.279515	11.8728	1.63924e-32	1.42898e-31
Pycrl	201.7	5.14483	0.433438	11.8698	1.69835e-32	1.4797e-31
Saa1	1601.63	-13.5747	1.14395	-11.8665	1.76634e-32	1.5381e-31
Smo	152.461	-6.85821	0.577996	-11.8655	1.78855e-32	1.55659e-31
Tek	720.901	-10.8429	0.913866	-11.8648	1.80259e-32	1.56796e-31
Pde12	445.688	9.51347	0.801962	11.8627	1.84824e-32	1.60679e-31
Pum1	1812.64	13.5822	1.14501	11.8621	1.86185e-32	1.61775e-31
Hoxa9	391.692	8.64194	0.728644	11.8603	1.90307e-32	1.65267e-31
Sod3	689.422	-10.7831	0.909398	-11.8574	1.97061e-32	1.71039e-31
Nkd1	350.395	-9.34693	0.788454	-11.8547	2.03339e-32	1.76392e-31
Ocln	1517.01	-13.5045	1.13946	-11.8516	2.11083e-32	1.83011e-31
Sgk3	1999.25	-3.18925	0.269101	-11.8515	2.11399e-32	1.83185e-31
Paqr9	382.118	-9.46104	0.798462	-11.8491	2.17581e-32	1.88441e-31
Thrap3	1807.37	13.577	1.14603	11.847	2.23036e-32	1.9306e-31
U2surp	1140.14	1.72383	0.145511	11.8467	2.23893e-32	1.93698e-31
Uba2	5351.72	-1.84797	0.156021	-11.8444	2.30094e-32	1.98955e-31
Pld5	1747.56	-13.6826	1.15526	-11.8438	2.3174e-32	2.0027e-31
Zbtb7c	1520.69	-13.5068	1.1405	-11.8428	2.34384e-32	2.02446e-31
Mms22l	179.815	6.30773	0.532685	11.8414	2.38495e-32	2.05886e-31
Snx11	1122.24	-1.87523	0.158411	-11.8378	2.49007e-32	2.14844e-31
Synj1	742.865	10.7338	0.906882	11.8359	2.54617e-32	2.19566e-31
Mia	141.305	-6.73748	0.569467	-11.8312	2.69275e-32	2.32081e-31
Pelo	137.748	5.4678	0.462192	11.8301	2.72709e-32	2.34914e-31
Runx3	1776.04	13.5532	1.14585	11.8281	2.79545e-32	2.40673e-31
Ttc7	2466.26	3.04628	0.257574	11.8268	2.83728e-32	2.44144e-31
Samm50	6319.67	-2.62479	0.22196	-11.8255	2.88071e-32	2.47748e-31
Rbfa	660.985	2.66721	0.225552	11.8253	2.88992e-32	2.48357e-31
Zp1	960.097	-11.2181	0.948659	-11.8252	2.8909e-32	2.48357e-31
Syncrip	1683.12	13.4845	1.1407	11.8212	3.03278e-32	2.60406e-31
Pcdh1	178.681	-7.46549	0.631821	-11.8158	3.23364e-32	2.77504e-31
Tfrc	2092.32	4.11608	0.348382	11.8148	3.27183e-32	2.80631e-31
Oraov1	1283.43	-2.34123	0.198179	-11.8137	3.31557e-32	2.8423e-31
Toporsl	1831.03	-13.738	1.16325	-11.81	3.46534e-32	2.9691e-31
Zmiz1	1762.55	13.541	1.14726	11.8029	3.77118e-32	3.22942e-31
Zap70	2254.98	6.50704	0.55139	11.8012	3.8499e-32	3.29506e-31
Ptk6	206.35	-7.91561	0.671105	-11.7949	4.14765e-32	3.54801e-31
Nmt1	748.801	10.7402	0.910665	11.7938	4.20055e-32	3.59134e-31
Rars	719.754	10.6979	0.907581	11.7872	4.54191e-32	3.88111e-31
Ptcd2	10365.7	-4.56717	0.387514	-11.7858	4.62026e-32	3.94596e-31
Ttc17	2620.63	-2.00982	0.170577	-11.7825	4.80632e-32	4.10268e-31
Psmb8	3531.79	2.44119	0.207194	11.7822	4.82339e-32	4.11505e-31
Tec	336.147	8.76336	0.743825	11.7815	4.86309e-32	4.14671e-31
Slc35g1	367.945	3.85478	0.327206	11.7809	4.89656e-32	4.17303e-31
Tmem116	124.009	-5.37448	0.45629	-11.7787	5.02904e-32	4.28365e-31
Nlk	516.027	5.91189	0.502217	11.7716	5.46777e-32	4.65488e-31
Trim67	284.222	-8.67062	0.736597	-11.7712	5.49426e-32	4.67494e-31
Ttc12	422.484	-6.99906	0.594706	-11.7689	5.64259e-32	4.7986e-31
Pnn	1582.67	13.4008	1.13954	11.7598	6.28495e-32	5.34204e-31
Spata9	216.475	-7.9928	0.67988	-11.7562	6.56306e-32	5.57547e-31
Slc25a12	794.536	2.55253	0.217151	11.7546	6.68483e-32	5.6759e-31
Retn	349.48	-9.3416	0.794928	-11.7515	6.93764e-32	5.88743e-31
Mbd3l1	1405.57	-13.3979	1.14035	-11.7489	7.1541e-32	6.06791e-31
Prex2	239.233	-8.42438	0.71741	-11.7428	7.69181e-32	6.52052e-31
Hnrnpa1	471.783	2.00224	0.170576	11.7381	8.13003e-32	6.88836e-31
Plekhb2	735.279	1.88877	0.160918	11.7375	8.18772e-32	6.93357e-31
Nfkbiz	3653.66	3.7786	0.32194	11.737	8.23771e-32	6.97221e-31
Napepld	873.796	-4.55502	0.38813	-11.7358	8.35064e-32	7.06405e-31
Puf60	1591.75	13.4053	1.14254	11.7329	8.63972e-32	7.30474e-31
Tab2	1619.5	13.427	1.14467	11.73	8.94601e-32	7.55971e-31
Xirp2	1487.59	-13.4677	1.14854	-11.726	9.3838e-32	7.92548e-31
Tcirg1	1633.62	13.4376	1.14599	11.7257	9.40779e-32	7.93736e-31
Zrsr2	619.397	2.76898	0.236144	11.7258	9.40309e-32	7.93736e-31
Papola	1646.9	13.447	1.14763	11.7171	1.0414e-31	8.78166e-31
Skida1	159.243	-7.30596	0.623623	-11.7153	1.06353e-31	8.96353e-31
Zfp39	533.932	-2.15745	0.184171	-11.7144	1.0758e-31	9.06218e-31
Zdhhc22	2116.58	-13.0449	1.11382	-11.7119	1.10738e-31	9.32335e-31
Mtcl1	697	-10.7866	0.921228	-11.7089	1.14778e-31	9.65834e-31
Tspan6	119.187	-6.18388	0.528158	-11.7084	1.15451e-31	9.70988e-31
Sltm	1507.73	13.3344	1.1389	11.7081	1.15819e-31	9.73571e-31
Serpina10	1471.3	-13.4515	1.14899	-11.7072	1.17071e-31	9.83581e-31
Uxs1	643.152	-2.78822	0.238199	-11.7054	1.19611e-31	1.00439e-30
Pde6d	145.565	4.30066	0.3677	11.6961	1.33434e-31	1.11988e-30
Pacrg	1372.32	-13.3627	1.14264	-11.6946	1.35834e-31	1.13943e-30
Tsga10	166.665	-2.77109	0.23701	-11.6919	1.40259e-31	1.17593e-30
Srpk2	1193.95	1.46652	0.125449	11.6902	1.43061e-31	1.1988e-30
Rnf138	1557.15	13.3729	1.14438	11.6858	1.5073e-31	1.2624e-30
Phrf1	1511.39	13.3354	1.14117	11.6857	1.50847e-31	1.26271e-30
Xrcc6bp1	394.039	-2.37124	0.202924	-11.6854	1.51382e-31	1.26652e-30
Nudc	881.517	4.29024	0.36735	11.6789	1.63367e-31	1.36608e-30
Reg1	1390.75	-13.3781	1.1455	-11.6789	1.63491e-31	1.36641e-30
Odc1	2667.01	8.63311	0.739259	11.6781	1.6503e-31	1.37856e-30
Mpp6	172.42	6.64969	0.569491	11.6766	1.67969e-31	1.40237e-30
Tram1l1	1458.03	-13.4371	1.151	-11.6743	1.72431e-31	1.43887e-30
Synj2	132.464	6.34168	0.543231	11.674	1.73095e-31	1.44366e-30
Rela	1736.59	13.5095	1.15725	11.6739	1.73392e-31	1.44539e-30
Usp26	1945.62	-13.7993	1.18243	-11.6703	1.80681e-31	1.50536e-30
Mtf1	486.793	1.8734	0.160555	11.6683	1.85159e-31	1.54187e-30
Rhbdf2	603.919	2.62977	0.225399	11.6672	1.87545e-31	1.56093e-30
Pik3cb	904.243	-2.33071	0.199769	-11.667	1.8792e-31	1.56323e-30
Sppl2c	1334.49	-13.3243	1.1421	-11.6665	1.88974e-31	1.57118e-30
Tatdn2	1780.39	13.5401	1.16065	11.666	1.90134e-31	1.58e-30
Ppp1r3fos	102.786	-4.09787	0.351372	-11.6625	1.98152e-31	1.64579e-30
Parvg	1665.84	13.4555	1.1542	11.6579	2.09185e-31	1.73652e-30
Ptrf	230.841	-8.07742	0.693103	-11.654	2.1896e-31	1.81672e-30
Trmt10c	446.023	2.26045	0.193965	11.6539	2.19189e-31	1.81723e-30
Polr2i	542.227	-2.05473	0.176313	-11.6539	2.19248e-31	1.81723e-30
Wee2	230.003	-8.37327	0.718558	-11.6529	2.21835e-31	1.83772e-30
Usp50	180.368	-6.63775	0.569691	-11.6515	2.25484e-31	1.86698e-30
Rpl38	5206.62	1.84549	0.15847	11.6456	2.41496e-31	1.99852e-30
Reps1	687.023	10.6227	0.912172	11.6455	2.41916e-31	2.00096e-30
Myo1f	2808.6	6.42146	0.551438	11.6449	2.43475e-31	2.01282e-30
Ube2ql1	1365.24	-13.3507	1.14718	-11.6379	2.64553e-31	2.18594e-30
Socs5	1840.11	-3.82075	0.328439	-11.6331	2.79896e-31	2.31152e-30
Rgma	1291.78	-13.28	1.14172	-11.6316	2.84735e-31	2.35028e-30
Pdlim3	611.238	-10.613	0.912572	-11.6298	2.90901e-31	2.39993e-30
Ociad1	1411.82	13.2436	1.13889	11.6285	2.95382e-31	2.43565e-30
Pkd1l3	2008.18	-2.45846	0.211481	-11.625	3.07707e-31	2.53597e-30
Ubox5	1767.51	-4.0978	0.352518	-11.6244	3.09868e-31	2.55247e-30
Slc25a26	925.782	-3.73277	0.321144	-11.6234	3.13567e-31	2.58161e-30
Ncoa4	1891.34	-2.70012	0.232406	-11.6181	3.33486e-31	2.74419e-30
Tcp10a	1246.15	-13.2328	1.13927	-11.6151	3.45254e-31	2.83956e-30
Mterfd1	280.145	2.52679	0.217569	11.6138	3.50836e-31	2.88399e-30
Pih1d1	331.989	2.48355	0.213879	11.612	3.58213e-31	2.94312e-30
Nucb1	1902.32	1.66406	0.143375	11.6063	3.829e-31	3.14433e-30
Tcf23	1765.23	-13.6709	1.17792	-11.606	3.84283e-31	3.15408e-30
Tfdp1	675.749	2.47778	0.213546	11.6031	3.9762e-31	3.26187e-30
Ranbp6	1228.28	-1.64849	0.142112	-11.5999	4.12456e-31	3.38184e-30
Pgpep1l	207.022	-2.88157	0.248443	-11.5985	4.19372e-31	3.43679e-30
Trpm7	1411.65	13.2398	1.14222	11.5913	4.56367e-31	3.73805e-30
Zcchc13	1509.58	-13.4723	1.16232	-11.5909	4.58294e-31	3.75192e-30
Nptn	1448.22	13.2718	1.14544	11.5867	4.81446e-31	3.9378e-30
Zfp51	246.181	8.30967	0.717175	11.5867	4.81492e-31	3.9378e-30
Scara3	1234.69	-13.2184	1.14095	-11.5854	4.88716e-31	3.99484e-30
Ttc37	371.649	9.26978	0.800519	11.5797	5.22259e-31	4.26685e-30
Nuggc	228.379	-8.3607	0.722202	-11.5767	5.41064e-31	4.41823e-30
Tmcc2	1467.93	-8.02163	0.692923	-11.5765	5.42136e-31	4.42473e-30
Sqstm1	2675.73	5.00049	0.431974	11.5759	5.45883e-31	4.45304e-30
Pou6f1	1418.8	13.2448	1.14417	11.5758	5.46324e-31	4.45437e-30
Rltpr	1362.89	13.1939	1.13981	11.5756	5.48044e-31	4.46611e-30
Zdhhc20	1487.93	13.3045	1.14964	11.5727	5.66557e-31	4.61463e-30
Pan3	1733.57	12.6184	1.09036	11.5727	5.66938e-31	4.61538e-30
Ppara	309.894	-9.16872	0.792317	-11.572	5.71139e-31	4.64722e-30
Serhl	649.872	-2.51508	0.217364	-11.5708	5.79328e-31	4.71145e-30
Npepl1	1416.22	13.2419	1.14446	11.5705	5.8157e-31	4.72729e-30
Rufy4	590.874	-5.93362	0.513021	-11.566	6.12483e-31	4.97604e-30
Srrm3	1207.49	-13.1881	1.14026	-11.5659	6.13688e-31	4.9833e-30
Ndufa12	853.49	-1.96109	0.16957	-11.5651	6.19435e-31	5.02741e-30
Pacs1	1756.17	12.6298	1.09225	11.5632	6.33232e-31	5.13679e-30
Smco1	1280.8	-13.2626	1.14711	-11.5617	6.44003e-31	5.22151e-30
Ninl	106.509	-5.88667	0.50924	-11.5597	6.59292e-31	5.34277e-30
Tcap	119.222	-5.1956	0.449528	-11.5579	6.73336e-31	5.45382e-30
Timp1	144.987	-5.95751	0.51562	-11.5541	7.04012e-31	5.6994e-30
Parl	263.916	8.4336	0.729986	11.5531	7.12112e-31	5.76206e-30
Ptf1a	1228.5	-13.2087	1.14338	-11.5523	7.18383e-31	5.80987e-30
Ttc39d	2128.56	-13.0304	1.12812	-11.5505	7.33763e-31	5.93125e-30
Rad23b	1350.43	13.1792	1.1416	11.5445	7.87018e-31	6.35852e-30
Syne1	1355.88	13.1843	1.14212	11.5438	7.93744e-31	6.40639e-30
Zfp27	652.024	-3.24375	0.280995	-11.5438	7.93597e-31	6.40639e-30
Twist2	1178.43	-13.1552	1.13966	-11.543	8.00699e-31	6.45927e-30
Znf41-ps	138.517	-3.81224	0.330295	-11.5419	8.10777e-31	6.53727e-30
Pabpn1	1694.27	12.5831	1.09024	11.5416	8.13976e-31	6.55976e-30
Ppp3r2	1509.8	-13.4679	1.16695	-11.5411	8.18524e-31	6.59309e-30
Tcp10b	1884.81	-12.883	1.11628	-11.541	8.19754e-31	6.59968e-30
Nfyc	1137.37	-1.53898	0.13335	-11.5409	8.20996e-31	6.60635e-30
Mtfr2	407.505	-4.06544	0.352419	-11.5358	8.70495e-31	7.00114e-30
Mlec	1404.21	13.2278	1.14671	11.5355	8.74146e-31	7.02698e-30
Thrsp	1299.38	-13.2776	1.15105	-11.5353	8.76212e-31	7.04004e-30
Mta1	1423.95	13.2452	1.14836	11.534	8.88983e-31	7.13907e-30
Tnfsf18	276.427	-8.30116	0.719757	-11.5333	8.96684e-31	7.19731e-30
Rab25	104.192	-5.05846	0.438702	-11.5305	9.25851e-31	7.42769e-30
Sprn	146.125	-7.19282	0.62391	-11.5286	9.46399e-31	7.58874e-30
Nfkb1	2623.39	3.38116	0.29333	11.5268	9.66449e-31	7.74563e-30
Oaz2	110.472	5.64882	0.490091	11.5261	9.74966e-31	7.80997e-30
Zfp85	415.926	-2.98089	0.258652	-11.5247	9.90557e-31	7.9309e-30
[truncated: 22,061 more rows]

## Sheet: Sheet1
	-11.3608	7.92792
	-5.49307	3.22015
	-4.12523	12.685
	-9.81182	2.19751
	-7.91833	12.3831
	-4.77914	5.68561
	-3.49675	7.40582
	-8.52954	7.71611
	-13.9902	2.88953
	-2.53787	4.03062
	-3.13031	2.32132
	-6.6403	2.63722
	-3.91813	2.02506
	-4.24586	2.44731
	-3.29368	2.03602
	-2.05357	2.32959
	-4.54204	3.51602
	-4.06284	3.93594
	-2.18422	5.40977
	-2.53787	2.06541
	-2.86891	2.56552
	-2.24616	2.59951
	-2.89582	2.01258
	-2.1345	2.4837
	-2.92132	2.73699
	-2.33685	2.78958
	-2.53787	2.75084
	-3.0006	2.46202
	-3.04716	4.77013
	-2.15589	2.13444
	-5.79476	2.52862
	-2.68158	2.0718
	-2.08237	2.411
	-2.37713	2.58942
	-2.35196	3.27841
	-2.24822	2.6364
	-3.71614	4.69276
	-3.26785	2.83548
	-2.62647	4.22517
	-12.0892	4.85649
	-2.05421	2.00369
	-2.0078	2.18749
	-2.5123	2.18224
	-2.09464	3.4267
	-2.31412	3.54165
	-2.2803	2.37269
	-2.1587	2.27171
	-3.1642	2.80333
	-2.5737	2.14295
	-2.31561	2.5748
	-4.30953	2.86715
	-4.02768	2.03608
	-4.30379	2.0052
	-2.28148	2.55456
	-2.46768	3.18062
	-2.55979	2.3181
	-4.08398	4.47581
	-2.2708	2.33702
	-2.62617	3.1585
	-2.49318	5.00753
	-2.01107	2.59798
	-5.38647	2.13499
	-2.79545	2.32784
	-2.68205	2.21394
	-2.06306	3.02255
	-3.6614	2.39513
	-2.71143	5.48508
	-2.26549	2.18877
	-2.57354	2.37349
	-3.18534	2.08949
	-3.39272	2.0438
	-5.15929	2.55994
	-7.53391	3.59685
	-2.04546	2.07047
	-3.53208	2.31513
	-5.61	3.45824
	-3.16402	2.21915
	-2.01265	2.40853
	-3.92468	2.09895
	-6.07667	2.02041
	-3.49772	4.44413
	-2.36695	2.31721
	-3.44478	2.25742
	-2.70015	2.36004
	-3.90862	2.4748
	-2.81639	2.66451
	-2.34883	6.02975
	-2.72685	2.15322
	-2.19076	2.82935
	-8.21247	2.72806
	-5.67202	2.94104
	-6.49517	2.17882
	-4.36194	2.3392
	-2.02867	3.90873
	-4.30914	4.44535
	-2.69645	2.16006
	-5.36893	2.09523
	-2.65689	2.57868
	-2.59327	4.22806
	-2.96629	3.59088
	-3.73617	2.00827
	-2.09452	4.83029
	-2.1971	2.45411
	-2.05357	2.52899
	-2.96162	2.13905
	-2.52523	2.26767
	-2.85984	2.613
	-2.60413	3.91244
	-4.85954	2.32741
	-5.87878	2.75137
	-8.14833	2.07373
	-2.59458	2.67343
	-5.43126	3.20985
	-3.63884	3.31657
	-2.22212	2.20303
	-2.46689	2.61295
	-2.17427	2.42419
	-2.66705	2.43366
	-3.3598	2.67697
	-2.05357	2.18749
	-3.23927	3.02871
	-2.17611	2.05828
	-2.06836	2.71949
	-2.68848	2.45534
	-2.35088	2.23153
	-3.1104	3.61748
	-2.2637	2.49387
	-2.53787	3.83683
	-2.47162	2.11204
	-2.34114	4.23538
	-5.09249	2.75347
	-3.59862	2.21336
	-2.05834	3.34566
	-2.55631	2.67401
	-2.93481	2.18498
	-2.35607	2.62535
	-2.29977	2.35198
	-2.78121	2.6558
	-4.35693	3.68297
	-2.33248	2.07957
	-4.56924	2.07904
	-4.00642	2.29242
	-3.07216	3.49277
	-2.27049	4.00597
	-2.83798	2.76637
	-4.07231	3.15069
	-4.06791	2.1541
	-2.02533	5.606
	-4.5469	2.88617
	-6.05531	2.54414
	-2.4652	2.06166
	-2.07196	3.07715
	-3.17016	3.29255
	-2.70901	2.45937
	-6.00041	2.21704
	-5.24602	2.33244
	-3.93327	2.38245
	-2.50418	4.27805
	-4.90584	4.63269
	-3.70639	5.23237
	-4.76808	3.30738
	-2.16663	3.16914
	-3.38801	2.18877
	-2.81639	2.59573
	-2.15817	3.85437
	-2.24892	4.24806
	-3.00503	2.80333
	-5.85932	2.10398
	-2.67029	2.17831
	-4.50254	4.40625
	-2.56792	4.66743
	-5.48714	2.24089
	-2.59881	4.59037
	-2.28162	3.35283
	-4.42814	4.57038
	-3.56254	2.05485
	-3.90123	2.07411
	-3.19573	2.56552
	-6.35188	2.97887
	-4.41159	2.84409
	-2.21248	2.06797
	-2.15029	2.43317
	-2.1202	2.18255
	-7.4891	2.86091
	-2.86588	3.24515
	-2.48652	2.82566
	-4.87327	4.08095
	-2.38317	2.13444
	-2.61369	2.52079
	-2.59134	2.35147
	-3.19983	2.86148
	-3.05792	2.35942
	-2.11456	2.4246
	-3.85333	2.22099
	-2.65689	3.44949
	-2.14845	2.58942
	-4.30952	2.90345
	-2.20328	2.15341
	-2.49279	2.9617
	-2.64582	2.76937
	-3.03585	3.33202
	-3.27633	3.99548
	-2.84518	3.59515
	-3.2564	2.50491
	-5.52002	5.1253
	-6.39997	2.41367
	-4.59441	5.7454
	-3.74567	5.50474
	-6.13527	2.93703
	-2.55916	2.29221
	-2.97034	2.05311
	-2.0915	2.62949
	-2.13593	2.49167
	-2.28162	3.47031
	-2.05985	4.47553
	-2.28048	2.83783
	-2.11727	2.37645
	-2.01183	2.29477
	-2.66889	2.05906
	-3.67149	3.2761
	-2.56534	3.14983
	-5.51604	3.51225
	-3.66723	2.42172
	-3.80194	3.44973
	-5.07101	2.91358
	-3.6614	2.57169
	-3.45626	3.06349
	-2.70177	2.59097
	-2.22315	2.59393
	-2.58264	5.88133
	-4.91459	2.69274
	-2.88173	2.57901
	-2.10266	2.27517
	-2.67882	3.52739
	-2.80491	2.21765
	-3.73027	3.73343
	-2.01735	3.19496
	-3.07776	2.61554
	-6.16627	5.15435
	-2.14822	6.91147
	-2.45085	5.42695
	-2.34794	2.5654
	-3.52043	2.11023
	-2.55631	2.21672
	-2.02852	2.21249
	-2.96985	3.09748
	-2.19618	3.52651
	-2.13763	5.28438
	-2.16452	2.11343
	-2.44317	4.79112
	-4.00344	5.05141
	-2.04432	2.34572
	-2.23365	3.2528
	-3.39308	2.41628
	-2.427	2.75608
	-3.80382	3.31277
	-3.56477	2.44792
	-2.71632	2.26139
	-3.70003	2.07914
	-2.61792	2.28173
	-8.32386	2.269
	-9.29085	2.30586
	-2.6202	2.21765
	-2.3445	2.14096
	-2.03408	2.16532
	-2.36103	2.00019
	-2.44317	2.17403
	-2.55631	2.11596
	-2.58518	2.24766
	-2.43077	2.03682
	-2.50222	2.00944
	-2.42338	2.21214
	-2.15549	2.08247
	-2.04613	2.18749
	-2.01046	2.23693
	-2.86031	5.60693
	-3.75501	3.46857
	-3.04864	2.04339
	-4.67678	2.04306
	-5.93234	2.30995
	-3.63499	2.71061
	-2.20129	2.31294
	-3.1199	3.43476
	-4.05666	2.047
	-2.60414	2.05555
	-2.29813	3.28787
	-3.31988	2.09697
	-3.65502	2.86816
	-2.07362	2.04645
	-2.52632	2.65621
	-2.41444	3.44708
	-5.40517	2.18031
	-5.78365	2.182
	-3.31078	2.15487
	-2.60413	5.82658
	-2.2187	2.21214
	-6.88975	3.03469
	-2.74917	5.56222
	-2.71904	2.047
	-2.25315	4.78805
	-2.21014	3.40281
	-3.25062	2.60752
	-3.19887	3.25968
	-2.45779	2.20199
	-2.11456	3.65826
	-2.16416	2.58709
	-2.33248	2.00904
	-3.07415	2.27138
	-2.0778	3.37528
	-3.26842	2.37948
	-3.8223	2.33291
	-7.59161	2.11063
	-4.20464	2.48275
	-4.53937	2.41958
	-3.92161	2.18943
	-2.14646	2.34485
	-4.07154	3.82233
	-2.13805	3.04938
	-5.10605	2.89313
	-2.00785	2.33913
	-3.91368	4.24291
	-3.2173	3.81898
	-6.0144	2.00224
	-3.37473	2.3567
	-3.71318	8.64194
	-4.29551	2.64647
	-5.21561	2.65736
	-2.20232	7.85928
	-2.44627	7.93709
	-2.60234	2.93623
	-3.93031	2.87456
	-2.77528	2.08256
	-2.10784	2.03608
	-3.07668	4.31399
	-2.31561	4.18149
	-4.66708	3.9447
	-4.00348	2.78614
	-3.30687	2.23087
	-3.83957	2.59824
	-2.9432	3.23241
	-2.01134	2.71788
	-2.22837	2.3567
	-3.17563	3.77233
	-3.12376	2.31277
	-3.38048	4.33177
	-2.43339	2.21405
	-5.03647	2.59551
	-3.78936	2.37974
	-2.01235	3.12793
	-2.68598	2.40229
	-4.16331	2.93703
	-3.40736	2.24453
	-4.96492	2.90979
	-2.58835	2.9891
	-3.34518	2.56767
	-4.31112	3.39036
	-2.57678	2.17203
	-5.97714	6.98377
	-2.18899	3.13635
	-4.30607	3.27463
	-2.97728	2.19639
	-2.86521	6.90239
	-2.427	3.86096
	-2.28234	2.06188
	-2.74298	2.89425
	-2.1299	3.37245
	-3.0172	2.6962
	-2.0041	2.20387
	-2.62639	2.93165
	-4.16123	2.73699
	-4.69245	2.14112
	-3.03585	3.09302
	-2.60842	3.64806
	-3.06032	3.10663
	-4.77811	3.94825
	-3.48057	2.30084
	-3.25213	2.04529
	-3.03585	3.27425
	-6.04137	3.16091
	-3.43693	2.08935
	-2.57174	4.85124
	-3.30163	3.50009
	-2.26697	3.28412
	-4.56607	2.09697
	-5.32554	2.72751
	-3.77763	3.20647
	-4.72162	3.19949
	-3.30056	4.67193
	-3.79571	3.96643
	-4.84939	2.63894
	-3.53001	2.47761
	-2.41889	2.49164
	-2.10006	6.07497
	-3.33835	2.33806
	-2.0401	3.24652
	-4.14902	2.47532
	-3.54837	2.54505
	-2.50557	2.89652
	-2.57719	3.54699
	-2.14927	2.06237
	-4.86787	6.26769
	-3.21814	2.0487
	-4.21916	2.26924
	-3.89704	2.03608
	-2.11196	2.24222
	-3.78921	2.80765
	-3.60306	2.91207
	-2.75927	10.917
	-2.78443	7.67073
	-2.50312	2.56162
	-4.39928	7.52541
	-2.09852	9.31492
	-4.2124	6.62287
	-2.15073	4.26744
	-2.26901	12.5634
	-2.90118	12.4805
	-2.69455	13.9122
	-3.59349	2.72831
	-3.74858	13.5628
	-2.10488	9.38824
	-2.43672	9.8982
	-3.47114	2.92839
	-2.08406	4.2399
	-3.33103	9.02431
	-4.94692	10.0605
	-2.16079	4.21529
	-2.21448	7.94037
	-2.44595	8.43563
	-2.03704	8.32024
	-4.11035	4.62879
	-5.11047	7.6294
	-2.25223	15.4286
	-5.30483	8.90957
	-3.41149	2.22763
	-2.21042	3.95363
	-2.75481	10.7694
	-3.41149	8.13182
	-2.8482	5.10098
	-2.96212	7.44722
	-3.49603	4.1488
	-6.12729	3.77395
	-2.08845	2.33495
	-2.2284	12.4139
	-2.73275	7.24251
	-3.45261	5.70425
	-4.16398	3.72652
	-3.08685	2.11697
	-4.3871	10.3037
	-4.97482	2.40901
	-6.46034	8.27071
	-4.04743	2.49016
	-3.67542	3.31396
	-5.29783	3.2022
	-3.141	2.69259
	-2.26449	12.2271
	-2.28162	5.26537
	-3.23951	9.45302
	-5.5799	4.21824
	-4.15968	8.91375
	-4.04746	2.71256
	-3.51292	7.13062
	-2.10151	7.83132
	-2.79462	13.1744
	-2.6385	10.7011
	-2.23662	3.54537
	-2.09114	6.38898
	-2.89446	6.15966
	-4.33556	2.64756
	-3.18029	4.69354
	-2.3298	10.9069
	-3.8747	2.64177
	-4.093	6.66785
	-2.90882	11.5997
	-7.12176	11.5135
	-3.83204	10.9324
	-2.51463	11.1712
	-2.60747	2.80379
	-2.37059	2.96606
	-2.70371	2.57968
	-2.27132	10.8399
	-4.86679	10.0583
	-2.427	11.9953
	-3.90797	2.1383
	-2.86887	11.3662
	-3.41178	2.83385
	-2.70601	9.32348
	-2.55381	3.0825
	-2.00815	2.93383
	-3.01857	9.53672
	-3.03585	11.0023
	-2.31561	8.43937
	-3.79729	4.24169
	-2.13017	3.66008
	-4.97615	7.20888
	-2.08845	4.48608
	-3.57065	6.83073
	-2.93946	11.5007
	-2.01235	3.78041
	-2.64582	6.23243
	-3.80045	2.81806
	-3.83776	3.01987
	-6.00658	4.50293
	-2.46817	2.11253
	-2.79217	5.93863
	-6.51202	3.11787
	-2.07776	8.99024
	-2.00149	7.50204
	-2.23035	5.46763
	-2.43685	10.0729
	-2.33139	5.102
	-2.55495	4.65047
	-2.08406	3.50419
	-4.02505	2.04339
	-3.41086	3.96895
	-4.7724	2.97887
	-5.71521	2.63466
	-2.9916	8.21614
	-2.62286	2.34618
	-5.00879	3.77687
	-2.19121	5.02066
	-2.06066	4.7436
	-5.66022	3.24631
	-2.39018	3.06855
	-2.15673	3.01096
	-3.08783	3.79862
	-2.36739	3.35201
	-2.07991	5.2542
	-2.06988	2.15963
	-4.8497	2.62949
	-5.96208	5.76713
	-3.88974	3.72556
	-2.35241	4.5272
	-4.11081	2.59579
	-2.87376	9.33006
	-2.55631	5.43515
	-4.8926	3.17639
	-2.22922	5.56631
	-2.28162	5.64428
	-2.96411	3.7185
	-3.54748	3.3554
	-4.02632	3.90873
	-2.26649	4.87248
	-2.54559	8.80623
	-3.44164	3.65221
	-3.25062	6.69997
	-2.21179	7.2641
	-2.28234	4.08095
	-2.22173	5.00594
	-4.68263	2.23468
	-2.11582	6.49217
	-2.38056	3.56056
	-8.21866	5.42649
	-3.24268	5.22442
	-4.12612	2.76913
	-2.11419	2.45988
	-5.16145	2.04339
	-3.01198	2.80692
	-3.66581	3.52958
	-5.51236	12.5572
	-10.0548	4.61327
	-8.21393	5.70189
	-4.56804	3.01493
	-2.80266	5.69642
	-2.06473	5.9345
	-11.3209	3.30946
	-6.80565	4.62053
	-3.29732	2.04339
	-6.71083	2.33567
	-8.69656	4.99658
	-5.08028	2.0596
	-8.195	2.36289
	-3.95197	2.32959
	-3.16614	3.23165
	-2.7823	4.30165
	-12.7865	6.76397
	-3.5139	5.22071
	-13.3979	3.56575
	-12.4763	3.98091
	-13.102	3.30008
	-10.6159	3.05316
	-5.18679	4.69155
	-8.82995	5.36978
	-3.48683	2.59798
	-10.9554	2.33451
	-10.9147	2.6396
	-4.74002	3.92425
	-8.51614	2.81216
	-2.50897	3.78268
	-10.171	2.56552
	-2.22041	2.61422
	-5.64641	3.66969
	-2.16163	4.46688
	-7.44689	7.24879
	-3.43058	3.50448
	-5.39673	4.73828
	-6.96815	2.23024
	-2.33248	4.64628
	-2.80347	2.24453
	-7.0128	4.01034
	-3.45142	4.81347
	-11.0781	3.1327
	-3.95643	6.8751
	-15.0584	3.73115
	-2.33161	3.01303
	-10.0529	4.63438
	-2.15772	2.57071
	-2.12333	2.48761
	-2.65602	2.03608
	-2.23677	5.84381
	-10.6499	2.824
	-9.24835	2.72321
	-2.87238	5.50391
	-13.1241	3.11477
	-5.04151	7.16384
	-6.47454	3.21427
	-4.22468	4.78089
	-5.44093	6.42123
	-11.2604	2.7646
	-12.0965	2.29817
	-9.06754	4.16872
	-10.9579	3.93641
	-11.6839	4.62474
	-9.42199	4.76606
	-2.32299	2.56552
	-2.39006	6.35768
	-9.43708	5.62241
	-9.83515	2.80333
	-7.6429	5.40554
	-2.11579	3.92537
	-2.16937	2.80333
	-10.7946	10.8458
	-8.01884	10.4078
	-7.43486	6.95835
	-12.3281	5.3181
	-3.91373	10.3299
	-10.3064	13.3635
	-11.6301	13.2278
	-2.14823	4.53886
	-2.05847	4.06366
	-7.46971	12.6833
	-5.45509	4.69605
	-9.80673	3.52082
	-11.8195	11.7478
	-12.5796	3.63239
	-8.12232	5.57449
	-3.20336	10.3813
	-8.5367	6.69888
	-6.73748	2.3943
	-8.20172	6.99149
	-2.5647	3.80979
	-4.53243	4.44166
	-3.95065	8.8624
	-6.96442	11.2792
	-2.15031	7.08809
	-3.71837	6.30773
	-6.59167	13.1109
	-2.48449	3.8181
	-2.541	12.7302
	-11.9001	7.48146
	-10.2555	3.37607
	-3.0994	11.106
	-11.374	2.08868
	-9.38174	5.48493
	-10.0393	9.94686
	-8.11753	8.95856
	-4.32663	2.26716
	-2.31561	10.8064
	-4.26803	9.84761
	-8.75548	9.89853
	-9.91486	8.81589
	-5.2544	8.96173
	-5.57605	2.67451
	-4.98106	9.71254
	-3.81847	2.56981
	-3.54143	8.05929
	-3.17453	9.80508
	-3.51467	6.64969
	-2.99861	2.55507
	-8.13025	12.7415
	-2.81094	8.5396
	-5.4856	10.3
	-4.79104	5.02858
	-3.41535	5.24454
	-3.0302	5.88193
	-4.1064	2.51109
	-5.50246	4.29691
	-9.00548	5.25659
	-2.11456	6.59071
	-3.41683	12.0896
	-6.83584	10.2632
	-2.88675	4.74359
	-3.99697	4.88505
	-2.97776	5.05443
	-2.60414	11.5949
	-4.66914	2.90728
	-2.76235	3.32372
	-4.6671	2.27983
	-4.46567	2.78455
	-2.97776	2.55789
	-4.44747	2.04092
	-13.6587	4.50059
	-4.49199	8.58307
	-2.95101	10.4992
	-4.81939	8.76737
	-2.3217	7.86513
	-5.5704	10.9861
	-4.08492	2.33383
	-4.40336	6.18071
	-2.26697	9.91896
	-4.435	9.51493
	-2.73275	11.5029
	-2.31561	12.0962
	-2.31561	7.28376
	-3.32148	5.92971
	-6.14534	5.13964
	-2.26697	5.49413
	-4.56258	5.91522
	-5.01634	6.5904
	-3.4244	7.93368
	-3.73687	6.28493
	-5.214	13.2452
	-2.76235	14.4224
	-6.11886	2.047
	-3.90699	8.97087
	-6.07318	10.5284
	-2.43917	2.52679
	-2.66522	2.39973
	-2.95385	4.97568
	-2.37346	2.76548
	-2.1314	2.80416
	-2.31561	2.19118
	-5.7617	4.00137
	-2.0968	10.3337
	-3.07727	3.62767
	-3.04406	4.59532
	-7.21242	2.33162
	-2.75922	10.4733
	-2.17904	12.3
	-4.29664	2.24264
	-5.07481	3.4009
	-2.77585	5.06526
	-2.70177	3.66732
	-4.24308	4.29021
	-3.77068	4.96049
	-3.22156	2.87824
	-2.17613	3.59118
	-4.20681	10.2746
	-2.53787	12.5182
	-7.01538	10.6219
	-6.26383	10.5195
	-2.35283	4.17977
	-2.1207	2.53122
	-2.17904	2.52955
	-3.76212	7.79567
	-2.50009	13.0454
	-3.10387	3.72451
	-8.29651	14.215
	-11.3279	8.90159
	-7.29671	2.59995
	-4.10722	12.5788
	-11.7085	5.85223
	-4.30953	11.1561
	-10.7378	2.02224
	-2.83736	4.7454
	-11.0612	13.7383
	-2.18783	13.7189
	-3.50542	11.334
	-11.0488	7.09472
	-4.15158	13.7362
	-9.97146	12.4359
	-3.19226	2.16851
	-11.1823	11.5382
	-10.674	7.77876
	-10.9571	5.79219
	-6.06087	7.43017
	-6.40951	6.42146
	-6.49165	5.87095
	-5.92007	4.95525
	-2.8757	11.1541
	-3.2254	7.69549
	-2.427	4.98071
	-6.80279	14.7844
	-6.46882	7.73319
	-8.74833	4.21654
	-9.96514	9.19362
	-10.2839	10.9248
	-7.24154	3.40749
	-2.3314	8.23456
	-2.87746	2.92097
	-10.6562	6.26822
	-3.10274	8.99121
	-10.4012	11.3833
	-4.50733	3.67902
	-12.4135	9.29638
	-7.64031	4.93132
	-6.87404	2.0715
	-2.65247	2.24149
	-5.16324	2.78004
	-3.57667	6.90529
	-8.81637	7.51271
	-11.7123	2.04339
	-10.3553	2.51017
	-11.1845	10.0325
	-3.79428	7.74527
	-10.6408	13.6046
	-6.21217	4.1979
	-2.61012	3.21851
	-10.2821	2.5199
	-12.6983	6.7256
	-13.2011	8.78203
	-10.5612	2.00432
	-4.16563	4.33594
	-5.68838	8.66266
	-7.57778	9.63948
	-8.51761	12.1792
	-12.0768	12.7116
	-9.13914	2.35964
	-2.19274	3.10796
	-7.49761	8.11878
	-7.88447	4.81774
	-12.3891	3.7932
	-4.71385	12.2738
	-2.05357	2.10197
	-2.21017	2.01939
	-2.01847	2.86785
	-2.99994	4.70251
	-8.66526	8.40676
	-10.8748	2.62979
	-11.6867	8.55186
	-12.0002	3.1846
	-5.08093	8.09463
	-10.0083	3.82448
	-3.53638	5.00086
	-2.59782	10.3518
	-7.29903	11.6364
	-11.3139	2.11442
	-3.53181	11.3168
	-7.80918	3.25074
	-2.09596	3.71338
	-6.1359	2.59749
	-12.1619	3.16321
	-4.34125	2.42796
	-5.57513	11.5969
	-2.25446	2.5401
	-10.546	5.09855
	-2.11181	9.76849
	-9.61994	5.50118
	-9.9957	2.20736
	-4.93649	10.5475
	-6.70973	4.23524
	-14.3059	3.79512
	-10.7866	5.69856
	-2.66044	7.51843
	-3.06765	10.3905
	-6.59445	2.66746
	-2.31461	12.3141
	-4.23583	7.14115
	-4.06544	8.21811
	-6.20056	12.2245
	-7.84436	6.01484
	-6.21114	6.02134
	-7.28913	5.5187
	-2.52382	6.48469
	-6.39581	3.04398
	-11.3775	2.62949
	-6.4296	9.77557
	-4.56727	9.91071
	-2.21066	3.18355
	-6.16496	9.4063
	-3.86104	12.6552
	-3.29978	2.94293
	-6.92437	4.0905
	-4.01749	12.0674
	-2.94823	3.38116
	-3.58298	4.78484
	-9.28695	3.7786
	-12.3112	3.25869
	-3.48193	2.28273
	-4.22511	5.57511
	-2.51449	10.7794
	-4.66841	7.93637
	-8.46307	2.57517
	-5.22905	7.05902
	-4.85251	11.246
	-2.57277	4.00675
	-2.22581	2.19252
	-5.49458	6.29463
	-8.56602	10.2166
	-3.03186	3.96596
	-3.35422	3.56142
	-8.79025	2.91021
	-8.61167	6.34211
	-8.33227	7.02128
	-3.19433	3.01159
	-10.338	3.26972
	-10.1539	7.07396
	-2.51979	14.3819
	-9.96938	10.3113
	-2.35983	8.90058
	-4.00713	4.44074
	-8.20236	10.8899
	-12.5746	11.8269
	-13.5814	6.96569
	-12.7989	5.91189
	-7.1044	2.74257
	-3.98599	2.25056
	-13.094	7.38199
	-2.50939	3.79511
	-2.5129	9.63695
	-7.28417	8.74871
	-5.18811	4.08425
	-2.13555	13.1837
	-6.32305	2.75682
	-2.10799	5.67437
	-8.58591	11.783
	-14.5496	7.64596
	-5.75011	3.36381
	-8.00046	10.7402
	-14.107	11.7401
	-9.08326	4.034
	-14.4172	2.97887
	-2.10548	4.32915
	-4.9713	11.8082
	-7.17515	2.31922
	-8.36126	2.63312
	-4.29536	10.7873
	-12.1276	3.08322
	-9.34363	9.95903
	-3.16439	11.5871
	-2.49096	11.5844
	-9.34497	12.5949
	-3.17085	3.84773
	-2.82597	2.32218
	-2.13947	9.90654
	-9.57082	2.87808
	-7.12031	8.40597
	-3.77524	8.14642
	-2.05642	4.94325
	-9.51249	11.362
	-2.18586	6.45561
	-5.45544	3.17639
	-9.20172	13.2419
	-8.72283	5.73693
	-2.28828	4.31126
	-6.99527	7.4529
	-13.1694	2.29306
	-9.75444	3.79417
	-4.55502	11.5483
	-3.2393	11.1799
	-10.0099	2.01258
	-3.93308	9.00345
	-7.82222	10.9836
	-3.57276	13.2718
	-10.0641	2.16809
	-7.95218	4.71204
	-4.73383	9.71586
	-7.57246	10.0502
	-11.0404	12.1036
	-2.02977	5.21321
	-3.6248	2.26767
	-3.14693	9.85967
	-4.33046	9.38448
	-8.94799	9.83351
	-2.39698	11.1614
	-12.5366	4.87186
	-2.70012	5.03029
	-4.9112	9.75814
	-8.49752	7.87215
	-4.38637	8.98882
	-3.61281	10.2829
	-13.0359	7.25778
	-5.17123	5.68245
	-10.8029	4.95437
	-3.11359	11.0584
	-5.15042	4.41377
	-11.4884	8.06895
	-11.425	4.41435
	-10.9149	4.1615
	-2.21661	10.9667
	-2.86357	13.949
	-2.39172	3.36848
	-11.1844	6.32182
	-2.39411	2.62017
	-9.16699	11.1635
	-9.21791	11.777
	-9.99961	6.01194
	-12.3617	7.96545
	-9.97186	2.0823
	-2.08429	4.48793
	-9.25908	10.3664
	-8.25488	10.5028
	-2.6164	6.67828
	-7.36262	4.44584
	-2.63745	10.63
	-11.6517	8.52176
	-10.4977	4.29024
	-10.834	2.6645
	-7.10193	9.73749
	-6.24314	5.32924
	-4.00762	5.00476
	-10.4984	4.53309
	-4.07254	2.29256
	-7.30716	3.61947
	-13.9848	7.47648
	-12.7202	2.43924
	-3.89957	2.65899
	-12.6458	2.47379
	-2.84729	3.31225
	-11.3523	6.97292
	-5.0117	11.4241
	-7.87227	7.16435
	-4.94048	8.58771
	-5.51333	11.6789
	-3.99008	2.78395
	-2.09315	13.4912
	-7.40743	3.07608
	-2.64523	10.2787
	-11.88	6.32223
	-3.26576	10.1735
	-9.64216	10.1684
	-7.3766	8.61738
	-11.5768	5.31551
	-11.3179	9.91613
	-3.71608	3.76564
	-7.46336	6.53366
	-4.3892	12.5011
	-10.5743	2.89046
	-5.88667	5.64882
	-10.9117	2.60811
	-14.2106	5.38498
	-4.29696	8.67106
	-5.56486	13.2436
	-9.71213	7.19117
	-9.34693	2.66742
	-5.9633	8.63311
	-5.80042	8.37251
	-10.3744	9.89822
	-14.2767	13.7415
	-3.30795	6.46236
	-2.59945	2.69603
	-7.71478	4.79174
	-7.94004	3.49546
	-2.17468	12.152
	-8.29202	4.5623
	-7.36543	2.32461
	-9.16427	7.96966
	-2.6906	5.01208
	-5.14515	3.22988
	-8.89669	2.03608
	-8.15477	3.82117
	-8.67479	2.13444
	-2.27643	6.83156
	-2.96894	2.03608
	-6.7575	4.1175
	-9.64087	4.45443
	-12.4721	2.23024
	-10.3321	4.48482
	-11.477	3.05316
	-2.89474	6.66877
	-14.3814	8.76673
	-8.07956	6.44969
	-8.42855	4.67672
	-10.426	3.0034
	-12.7933	3.40873
	-5.3751	11.1873
	-12.2513	11.16
	-6.80067	9.81682
	-2.70177	6.25497
	-7.41232	6.26225
	-6.42537	10.9008
	-4.68176	5.19996
	-11.9335	3.46307
	-4.78898	2.11196
	-9.08609	2.50765
	-4.46593	4.64625
	-10.155	10.7456
	-7.64643	4.98293
	-7.08704	4.5165
	-7.10697	8.89426
	-9.35805	7.94294
	-2.22468	7.78335
	-10.8011	4.99602
	-2.41174	11.3285
	-4.56718	11.7605
	-11.188	3.03549
	-10.9492	9.75125
	-13.3378	3.51753
	-3.40159	11.8927
	-6.46397	8.32723
	-10.5365	3.30164
	-6.05974	5.17687
	-13.1472	12.3774
	-8.18643	9.82855
	-12.9865	5.47039
	-5.61089	12.0436
	-4.43024	9.71238
	-6.51062	5.86688
	-8.84311	9.82391
	-5.34402	4.36167
	-4.13711	7.1434
	-11.8958	7.80712
	-13.0522	3.69526
	-5.97299	6.01364
	-4.66564	5.79556
	-6.22985	2.18709
	-6.68329	11.559
	-6.48662	8.81897
	-6.69144	6.71411
	-4.94209	10.3026
	-12.6974	6.59803
	-13.2042	12.5831
	-2.15422	2.21704
	-2.39731	6.53857
	-9.12884	12.6298
	-4.33388	4.89078
	-3.46568	6.8738
	-9.04281	5.92206
	-2.427	13.6179
	-12.1514	4.49916
	-5.02173	3.91335
	-2.82109	11.455
	-9.48236	5.65671
	-11.1059	9.82504
	-9.34183	8.28895
	-2.07171	3.77666
	-2.31561	8.9374
	-6.36589	4.42435
	-9.39205	12.6184
	-8.77455	3.33015
	-8.60401	4.99596
	-3.25872	11.4139
	-2.83168	6.02655
	-12.7718	13.447
	-9.15257	10.8788
	-3.52072	7.33578
	-4.90191	7.42706
	-2.23496	5.47851
	-2.99605	3.17907
	-8.3607	4.34952
	-6.73731	8.4336
	-2.58854	10.8148
	-4.49884	13.4555
	-2.50959	11.7538
	-3.86686	2.37349
	-6.93102	9.19568
	-12.3512	3.06855
	-4.45226	5.26184
	-4.93771	11.6062
	-5.79267	9.58647
	-5.54278	7.87537
	-11.6458	11.9362
	-2.91811	4.32167
	-11.1039	12.5293
	-14.4834	5.71075
	-2.88675	5.2692
	-7.43229	2.55956
	-2.6825	7.82107
	-5.43631	9.9649
	-8.42673	2.6839
	-5.03196	2.30493
	-4.41205	2.34992
	-9.47506	4.25073
	-2.2236	2.48653
	-3.06032	3.33849
	-10.7998	9.98076
	-6.20323	11.515
	-3.02568	5.30093
	-6.05453	4.78318
	-12.2508	4.53987
	-10.5789	11.6096
	-4.8356	4.9065
	-5.93496	4.00171
	-13.5045	4.67668
	-3.0078	11.1313
	-10.3067	9.51347
	-11.8445	3.93803
	-3.35535	9.18105
	-7.59284	6.20204
	-2.9987	4.30066
	-3.05448	3.15146
	-3.16621	10.0535
	-9.67058	4.18787
	-15.3248	4.888
	-7.90722	9.50283
	-2.26697	9.523
	-12.5811	5.19669
	-2.59388	6.80807
	-4.70414	3.17801
	-5.58202	2.90492
	-2.53787	8.22341
	-2.19274	10.3375
	-5.93359	11.8425
	-4.41159	12.0729
	-4.30274	2.27587
	-2.31561	2.92001
	-4.03643	11.7154
	-3.23951	7.84729
	-3.7921	5.32778
	-4.25512	7.10826
	-5.10514	12.2313
	-3.07536	7.27493
	-5.7472	8.43662
	-4.6485	12.2833
	-7.93253	6.41937
	-4.03443	5.4678
	-4.97324	7.52225
	-5.95004	4.99295
	-2.44158	3.73751
	-4.4098	4.78562
	-12.7038	7.56885
	-10.9527	4.7858
	-2.31561	3.97755
	-7.89829	10.3817
	-5.34947	8.79515
	-2.44487	2.87212
	-2.34123	3.2272
	-2.91402	3.43471
	-2.25619	10.1691
	-5.37705	4.66082
	-4.00814	2.68844
	-12.2385	5.27054
	-12.0571	6.50416
	-6.61087	10.8827
	-12.7096	8.17421
	-7.21996	2.34435
	-2.32858	11.2923
	-8.63435	3.03325
	-11.1124	11.7073
	-14.1542	11.0216
	-12.4908	11.0477
	-3.25389	9.74146
	-5.29934	7.22772
	-5.04403	11.533
	-12.329	10.809
	-3.14988	2.11511
	-11.9196	3.09244
	-12.0637	8.043
	-6.76376	2.71572
	-2.91091	2.65348
	-9.7061	8.04612
	-11.7455	3.50326
	-7.75443	4.86874
	-11.5814	3.6178
	-9.07024	2.84697
	-2.67576	6.96606
	-8.19291	6.2524
	-9.4475	4.43341
	-3.40735	2.00911
	-10.6006	5.19853
	-6.6888	10.203
	-15.9378	13.3354
	-12.5765	2.58895
	-13.3627	6.22667
	-2.97548	2.55658
	-2.53389	11.9789
	-9.11555	3.76973
	-2.33442	2.78803
	-5.69495	3.47256
	-4.52413	6.39347
	-14.099	4.37442
	-5.11107	2.0072
	-12.1016	2.97174
	-4.53864	9.79952
	-9.79433	2.48355
	-7.02289	6.62128
	-2.19274	11.3203
	-10.7325	2.56967
	-4.72525	12.5353
	-9.35207	3.59428
	-12.2754	7.07346
	-12.8285	2.56743
	-6.44016	6.74138
	-2.8581	5.63445
	-12.2216	3.82526
	-4.89937	3.23391
	-6.56695	12.9804
	-9.46104	3.99688
	-7.30665	5.43452
	-4.28313	2.63224
	-4.0589	14.0177
	-9.83419	13.6345
	-2.7174	2.60507
	-2.58813	12.1688
	-4.87063	6.80971
	-4.13843	6.99971
	-8.14487	10.8722
	-2.36767	4.93308
	-12.4363	4.23971
	-9.75673	7.85618
	-3.73479	5.82143
	-8.55734	2.28985
	-5.37728	2.37821
	-7.62875	11.0796
	-4.88694	8.91396
	-8.53796	7.83933
	-3.82488	11.9429
	-2.0968	2.94104
	-4.90132	6.78928
	-4.81541	4.04581
	-5.06627	5.90904
	-5.31161	8.3879
	-7.79707	3.43825
	-5.12032	6.24204
	-7.46549	4.19734
	-10.2032	5.15551
	-3.10921	3.31623
	-2.246	8.18638
	-2.65148	2.6698
	-3.76774	6.24775
	-5.51711	2.28644
	-4.17201	8.52028
	-3.59693	6.95745
	-2.84489	10.9753
	-2.02536	2.14138
	-3.14129	7.06815
	-4.37089	8.98126
	-4.52333	4.38146
	-3.43045	14.3044
	-3.13473	13.7435
	-10.117	7.34627
	-2.8208	4.01099
	-7.71926	6.38978
	-7.56805	10.1789
	-9.63697	6.12168
	-4.14169	2.9127
	-2.32813	10.1756
	-6.44346	5.34839
	-8.89179	3.02876
	-2.36921	11.6725
	-4.00998	9.93002
	-11.8197	6.44146
	-5.45688	8.94268
	-3.75017	3.22916
	-2.32074	2.32959
	-3.85389	4.74281
	-10.3204	3.738
	-9.43132	2.18578
	-3.62237	3.77684
	-5.81357	3.45174
	-2.42569	3.60963
	-2.00923	5.42164
	-5.50519	4.31412
	-9.48493	4.91036
	-4.63751	2.54416
	-10.4391	6.85751
	-4.59699	5.25322
	-8.76119	9.74186
	-11.6792	5.05355
	-5.13481	12.5236
	-8.15014	10.1675
	-8.8485	11.946
	-12.8909	9.54699
	-2.37992	4.38525
	-8.67289	6.98049
	-10.613	5.42648
	-4.27696	13.4008
	-2.61572	11.1972
	-8.4045	3.54997
	-3.61457	6.55794
	-5.20144	8.13011
	-4.25573	12.773
	-8.30829	3.53032
	-7.30862	2.85205
	-3.25125	11.7027
	-4.56747	11.1043
	-4.07684	2.47521
	-6.0765	2.03131
	-6.62715	2.51106
	-2.47926	5.78904
	-11.4088	2.35608
	-5.76219	2.4577
	-9.75931	4.64265
	-2.76402	3.26345
	-11.4829	2.61743
	-10.9265	6.03312
	-2.78771	10.6248
	-4.95623	2.25069
	-2.82549	4.45157
	-10.3365	5.85211
	-2.8266	3.3297
	-8.98012	6.8337
	-9.41778	2.07904
	-7.04071	8.59416
	-10.6158	10.2396
	-12.0759	11.6106
	-7.99086	11.494
	-15.7127	5.40653
	-5.04264	13.2448
	-4.84995	11.5164
	-9.11481	6.77783
	-5.67387	2.04719
	-9.92349	10.2909
	-11.5643	10.8412
	-12.6807	4.67803
	-12.279	4.18044
	-2.88157	10.7821
	-8.34147	7.85291
	-7.66307	5.51196
	-11.4832	2.84415
	-3.65666	7.78013
	-10.1002	6.48441
	-4.79723	2.02537
	-4.20006	7.70082
	-3.49611	5.86174
	-12.6134	7.46553
	-2.44627	6.9049
	-6.56115	3.18161
	-7.69842	2.03553
	-6.2663	3.36053
	-5.53384	5.58634
	-4.77941	15.5932
	-11.0702	13.1736
	-9.75996	5.8549
	-5.7969	9.88119
	-7.99468	11.8819
	-8.97774	2.02462
	-7.5269	10.1709
	-7.00457	8.00127
	-10.5293	3.38463
	-5.80504	11.2538
	-2.61284	11.9399
	-6.00026	3.7653
	-6.02261	9.93792
	-2.25996	4.36832
	-10.7596	7.10521
	-2.43611	3.05007
	-11.4554	4.48719
	-2.33071	12.2255
	-2.28075	7.07451
	-2.02028	2.69305
	-6.91234	2.04392
	-3.41982	2.34756
	-3.74567	9.84869
	-2.29215	11.6427
	-2.32748	9.74289
	-10.9793	12.1451
	-4.29809	2.24453
	-6.00834	11.7802
	-9.97248	5.971
	-4.58822	2.97548
	-14.011	5.43152
	-14.5283	10.0362
	-11.3424	8.56928
	-6.94119	2.29179
	-2.88675	3.35414
	-5.14372	12.8865
	-2.45846	4.01894
	-2.49604	7.87554
	-9.92139	3.56949
	-9.80893	5.20768
	-6.19927	6.72738
	-3.63118	7.9383
	-6.9304	10.9566
	-4.45723	8.29163
	-12.6138	3.82569
	-10.5495	10.9436
	-12.1641	3.37288
	-2.26697	2.66898
	-9.70816	3.17155
	-12.3928	3.40954
	-6.7225	2.65661
	-5.04788	2.96084
	-7.23401	4.65469
	-8.19929	12.7149
	-12.415	4.61401
	-4.95765	9.90974
	-4.71847	4.54591
	-3.86277	2.64083
	-8.33093	4.29079
	-3.71911	12.846
	-4.56018	10.8672
	-10.9424	2.86953
	-7.6455	6.49165
	-3.73973	5.74397
	-7.81256	2.01407
	-12.8211	5.44093
	-13.6826	6.35901
	-9.84322	2.59798
	-11.8638	7.11632
	-2.73695	9.00916
	-7.38228	2.42448
	-3.48791	4.22972
	-4.24437	8.11774
	-6.06112	3.50332
	-12.352	13.6103
	-7.7991	2.1675
	-2.46788	2.3178
	-6.36425	3.50146
	-5.63106	11.0212
	-7.77552	4.09326
	-11.6393	9.91293
	-2.30807	3.23865
	-6.20749	2.88802
	-8.25192	3.95049
	-9.69755	9.87524
	-6.11416	8.22804
	-8.52502	3.56097
	-7.18939	15.2811
	-4.07863	3.93657
	-8.90345	9.5623
	-2.05357	10.1911
	-5.91959	6.38333
	-3.8074	5.84061
	-11.102	10.7363
	-6.49604	4.04016
	-2.00116	7.37856
	-10.1103	5.50441
	-10.4901	10.2371
	-9.40102	9.53116
	-12.15	12.7209
	-2.32932	8.3568
	-7.9181	6.22506
	-3.6756	6.03796
	-11.9132	12.7345
	-5.27978	11.2361
	-4.85782	8.61703
	-13.767	12.072
	-4.90684	2.44119
	-12.5606	4.54118
	-5.28096	3.50728
	-2.21681	3.04357
	-9.31859	7.7609
	-7.54735	6.26651
	-6.44032	4.71829
	-2.80375	2.44829
	-2.17046	8.89014
	-2.1592	11.9767
	-2.79962	9.35093
	-3.96375	4.68473
	-2.68351	5.61913
	-3.99904	7.42251
	-2.05473	3.07766
	-11.8059	8.38026
	-12.7537	6.30829
	-2.10122	5.49594
	-9.19125	9.33653
	-2.17312	14.3462
	-7.10598	11.4584
	-9.794	7.148
	-11.8824	8.64677
	-11.3029	4.01777
	-10.5659	5.72827
	-12.4119	3.5257
	-4.01444	2.78252
	-6.1064	2.88885
	-11.6587	4.17561
	-5.77521	3.67554
	-6.39356	5.0703
	-6.66465	4.96503
	-8.12973	14.969
	-9.16872	2.87064
	-5.89225	7.58144
	-8.89212	5.06073
	-9.70361	9.36869
	-4.45019	4.14196
	-5.25744	8.33414
	-10.0954	3.2551
	-8.6723	4.13895
	-6.08226	11.4232
	-2.20612	4.56495
	-3.41837	10.7374
	-5.83001	7.36346
	-3.07474	5.74282
	-4.50533	3.16721
	-3.59683	13.4053
	-2.80098	13.5822
	-6.37535	3.60068
	-11.8146	2.16345
	-3.80386	5.52589
	-10.6602	6.54077
	-10.7292	6.23343
	-14.1477	2.06171
	-3.42522	5.20604
	-11.1885	2.65403
	-9.76597	6.07675
	-4.98699	9.77066
	-2.64763	5.14483
	-4.09787	4.00018
	-9.57619	12.8147
	-10.3389	13.6424
	-2.67989	11.86
	-12.2473	2.11135
	-12.1962	6.67925
	-2.53374	4.65473
	-13.4679	2.31174
	-3.98917	2.57052
	-5.19977	12.5753
	-2.08429	7.67441
	-12.6367	2.57459
	-3.40482	2.5388
	-9.53105	10.1475
	-8.23285	2.34797
	-3.23814	9.45697
	-11.1727	9.29396
	-3.43469	2.6117
	-10.442	2.09458
	-7.8715	7.50153
	-11.6685	3.10743
	-11.7955	3.39336
	-2.79824	2.29138
	-11.5928	2.69173
	-4.67148	10.0917
	-12.9562	12.2263
	-8.42438	9.64425
	-2.77774	4.45189
	-11.0932	5.5201
	-2.3157	2.05623
	-2.2284	2.11519
	-11.3185	3.25527
	-10.6596	3.15378
	-3.02937	11.9377
	-8.23329	2.84679
	-11.1894	5.71356
	-3.50654	5.18796
	-13.2634	4.03301
	-2.19989	4.05658
	-5.69095	2.5328
	-12.5729	13.1792
	-11.7306	7.22037
	-12.5845	3.76163
	-12.6785	2.10138
	-13.1342	2.50092
	-4.31641	2.54664
	-3.83229	4.819
	-2.74837	12.512
	-10.9498	4.55353
	-11.1419	12.7108
	-8.67559	5.30093
	-3.63659	4.72999
	-5.91232	8.56156
	-5.74935	3.52388
	-7.67251	4.84699
	-9.48202	2.824
	-8.76251	11.5268
	-7.95353	10.3452
	-3.11425	8.21838
	-10.7263	7.88984
	-13.5944	8.1135
	-4.37481	5.7584
	-9.89877	5.34666
	-10.7335	10.6979
	-10.7104	10.4935
	-8.33266	2.29327
	-8.76206	5.86143
	-7.51552	3.60749
	-8.20164	9.91035
	-2.01872	3.27842
	-5.37944	13.2453
	-4.09843	9.28358
	-4.31494	3.02021
	-4.94268	8.1209
	-4.85602	4.9232
	-6.62894	2.33248
	-5.8573	11.2983
	-8.60749	2.9524
	-5.79534	7.96857
	-2.79244	12.2008
	-5.17666	3.77054
	-4.29993	11.8987
	-8.14795	14.0049
	-3.58129	2.66721
	-2.36192	3.8863
	-2.89367	11.6874
	-2.18207	4.32457
	-11.1663	5.00641
	-10.4488	11.6204
	-10.1723	2.04708
	-10.4988	12.191
	-2.13089	11.3334
	-5.13485	4.05085
	-2.12715	4.43899
	-5.23514	5.919
	-2.37411	6.48753
	-2.44164	10.4636
	-6.18373	2.50887
	-6.75575	3.52281
	-2.91485	2.70086
	-4.64933	9.39432
	-4.56717	4.93189
	-8.7942	10.8311
	-8.56041	2.3482
	-2.0968	9.19361
	-3.52995	10.9776
	-7.09997	2.30927
	-13.2087	7.66511
	-5.26741	10.0222
	-6.28913	6.61944
	-2.24495	6.93556
	-11.3581	4.08012
	-8.14542	9.96237
	-4.25805	7.57217
	-7.8896	5.45232
	-4.75619	6.43025
	-4.16319	4.70079
	-7.91561	11.9144
	-10.3847	13.5095
	-13.9821	5.05549
	-2.25871	6.91205
	-6.82174	10.6227
	-9.57265	7.86817
	-2.80305	11.1837
	-4.48552	3.99969
	-5.61814	10.1049
	-12.6664	8.77654
	-3.26632	4.09094
	-9.37965	12.5266
	-2.86523	7.06482
	-9.97125	12.5968
	-17.5366	2.27924
	-2.53911	2.31612
	-7.6136	9.90018
	-9.69868	9.87068
	-4.98321	3.48231
	-7.77936	5.76837
	-9.58577	3.39536
	-2.6761	11.1818
	-8.07742	2.27941
	-10.9251	7.30411
	-12.8357	11.9505
	-4.21914	6.75253
	-2.31273	12.9643
	-10.1802	3.19768
	-6.82191	6.43663
	-5.75959	2.56552
	-3.73216	9.20781
	-3.05794	2.62977
	-7.48028	2.5684
	-2.70535	4.70986
	-7.398	10.0833
	-7.4894	3.24436
	-3.77085	13.0142
	-11.9625	3.81576
	-3.60294	9.08011
	-5.40241	8.3518
	-6.94951	5.46555
	-8.93685	13.1194
	-4.43187	8.91792
	-2.99795	2.68702
	-9.04803	8.08123
	-2.75564	4.81269
	-12.6355	5.00148
	-7.07142	7.36972
	-2.4351	6.36766
	-2.37917	3.89062
	-2.5305	2.33567
	-8.98203	10.7527
	-11.898	2.30995
	-2.43735	5.08468
	-3.89095	10.5605
	-11.5469	13.1939
	-2.14187	4.42938
	-3.4344	2.40092
	-5.05846	8.84273
	-7.81467	15.5029
	-2.74267	3.04548
	-6.68618	6.71621
	-5.74297	8.10221
	-6.81181	11.0573
	-6.44378	7.89402
	-7.40518	2.11212
	-7.50699	11.2723
	-2.01072	3.68107
	-6.78685	2.07653
	-5.47269	11.0958
	-4.22083	5.35169
	-3.7941	2.03903
	-13.5504	3.36897
	-4.61074	3.34758
	-3.45886	13.3729
	-8.10093	11.987
	-2.42631	2.32425
	-2.95155	3.44272
	-10.5625	5.54228
	-2.06454	10.6843
	-4.65561	9.61362
	-3.98654	2.39868
	-10.761	10.6761
	-3.2479	2.69734
	-4.26582	10.4313
	-3.65219	2.06335
	-11.8912	10.9975
	-12.303	7.03418
	-11.294	11.3312
	-12.4122	5.19936
	-4.50751	9.85418
	-9.65377	2.25701
	-4.53995	6.6043
	-9.78942	6.6202
	-9.62493	2.85076
	-4.86708	6.9108
	-7.12824	2.90341
	-2.72863	6.57957
	-8.41918	10.8154
	-5.4928	10.0306
	-2.79312	9.18534
	-3.32921	10.3799
	-5.24149	10.9462
	-7.48893	2.07637
	-5.41276	10.8393
	-4.63293	10.7371
	-14.4346	5.37964
	-8.39093	3.75041
	-4.518	16.4436
	-3.23757	2.89935
	-5.34128	2.46415
	-7.03397	10.3877
	-3.36556	2.90995
	-3.25679	2.62242
	-2.1207	3.8968
	-2.95769	15.4594
	-6.06808	3.40599
	-5.62552	3.02785
	-9.0792	8.63905
	-2.75889	7.12684
	-2.21994	14.5522
	-11.1656	3.77623
	-2.19274	17.6619
	-11.6455	11.5453
	-3.11897	2.98371
	-13.8004	2.63141
	-7.97062	4.29331
	-11.5113	2.06177
	-2.01874	13.8192
	-10.7139	9.3582
	-4.99608	2.42922
	-3.74281	2.80459
	-13.1915	15.6177
	-3.95134	15.9328
	-8.09741	2.04889
	-10.2287	2.13639
	-5.86538	12.106
	-11.5218	11.0198
	-13.2254	2.25611
	-2.30133	11.0957
	-9.75485	6.61623
	-9.99364	2.21862
	-3.24406	3.31863
	-3.99044	4.033
	-4.09678	14.774
	-12.6116	4.86412
	-4.26407	3.11246
	-9.84961	14.9409
	-8.58707	5.32046
	-2.38317	6.70846
	-9.97548	6.70999
	-9.76992	9.9185
	-8.15618	4.62945
	-4.81779	4.74851
	-4.60422	3.62897
	-7.71944	3.20104
	-9.07705	3.38901
	-7.81438	9.82774
	-13.3781	7.57268
	-5.82579	3.89435
	-2.52638	7.72027
	-9.47994	2.01058
	-3.2552	2.37015
	-7.1276	2.60414
	-3.83964	11.4048
	-7.14608	10.4749
	-12.21	3.74785
	-13.1366	9.74549
	-9.3416	12.5503
	-4.46107	6.14741
	-10.3385	6.52132
	-2.87355	7.71721
	-2.22267	10.4649
	-11.4288	10.1779
	-10.4841	11.347
	-2.02435	4.87585
	-10.4857	13.5532
	-2.64695	8.00887
	-10.5332	11.238
	-3.29524	12.0739
	-8.02167	5.9067
	-13.28	8.65161
	-10.3114	5.81049
	-13.1606	4.73053
	-11.0172	9.83846
	-12.2444	12.58
	-14.2233	9.13734
	-2.05357	4.23994
	-8.07277	7.00962
	-2.98398	3.34974
	-11.2841	3.3858
	-4.92461	3.42029
	-8.30503	5.12714
	-9.00209	9.9058
	-10.5896	4.06469
	-3.40232	3.3643
	-4.53686	10.8519
	-6.33728	10.2699
	-2.24528	3.0034
	-4.39586	4.34926
	-6.36764	11.1583
	-3.41584	12.5162
	-2.11456	4.48689
	-3.39424	12.2801
	-10.8254	9.83868
	-8.60812	11.3828
	-6.84953	9.03253
	-7.72674	2.80442
	-2.34125	9.5363
	-6.87772	5.19101
	-2.01703	2.41141
	-2.84244	2.52585
	-6.1922	4.03476
	-11.6109	3.58718
	-3.6614	7.47293
	-3.25062	9.53719
	-2.5113	5.12934
	-13.3347	8.83508
	-8.7762	9.37024
	-5.41063	7.79965
	-5.31959	5.53208
	-10.1726	3.32465
	-11.9833	7.91262
	-7.48526	2.30324
	-16.3223	5.46561
	-2.26697	7.85562
	-5.76945	11.098
	-11.3237	11.3351
	-4.81694	3.74174
	-3.88196	2.59579
	-2.79503	3.88796
	-11.0902	9.9165
	-4.38757	5.48749
	-3.19614	2.11997
	-2.07122	8.44069
	-6.49569	8.53454
	-12.2443	4.68018
	-3.12214	3.99247
	-7.8809	5.45906
	-2.07534	5.4084
	-4.65883	3.75348
	-13.8719	4.84903
	-8.15251	4.72366
	-2.79001	5.88234
	-2.66992	7.47617
	-9.74623	6.37678
	-2.96633	10.0442
	-4.04103	12.087
	-8.67279	3.88016
	-10.0576	10.3092
	-10.3075	8.25184
	-5.53989	3.01303
	-10.4727	4.79375
	-8.6044	11.204
	-3.22889	6.59162
	-2.08486	5.12876
	-2.71534	2.3349
	-2.52836	3.503
	-4.95532	2.40098
	-4.33328	3.38
	-5.7803	3.44816
	-9.35068	11.7857
	-7.8435	8.45545
	-5.01967	2.047
	-4.23258	11.7256
	-10.6468	11.1824
	-4.55946	13.5408
	-3.75778	4.16845
	-4.82673	6.67326
	-2.66406	2.10209
	-4.66118	2.15382
	-10.3785	11.8253
	-2.50115	12.3509
	-2.0839	7.78675
	-8.83695	5.79309
	-14.3745	3.29845
	-12.2714	15.7619
	-15.0138	3.09779
	-5.4566	5.06071
	-3.66054	6.9932
	-14.7033	2.39379
	-10.4567	10.4117
	-9.77478	10.9905
	-3.23918	3.62357
	-15.3853	6.87165
	-2.71991	7.96513
	-3.16842	4.41316
	-7.60366	2.17785
	-2.07918	4.31716
	-3.34273	3.94476
	-12.1366	2.76424
	-12.752	2.78976
	-11.2894	5.58629
	-10.9894	3.88703
	-9.19141	8.11425
	-4.61521	5.86098
	-4.31559	6.39959
	-14.0641	12.1132
	-12.2012	7.7854
	-2.32834	10.7868
	-6.4926	9.49191
	-3.77348	12.3098
	-12.2949	5.25808
	-2.67488	10.721
	-4.34186	4.28603
	-15.4375	2.7646
[truncated: 1,546 more rows]
