# Supplementary material for: HOXA9 Cooperates with Activated JAK/STAT Signaling to Drive Leukemia Development
Source: Oxford University Press journal article supplement (doi:10.1158/2159-8290.cd-17-0583), 2018-03-01
Supplement: 21598290cd170583-sup-183828_2_supp_4577672_p4shkc.xlsx [file 21598290cd170583-sup-183828_2_supp_4577672_p4shkc.xlsx]

## Sheet: JAK3_vs_CD8
NAME	GeneSet	SIZE	ES	NES	NOM p-val	FDR q-val	FWER p-val	RANK AT MAX	LEADING EDGE
1	OLFACTORY TRANSDUCTION%KEGG%HSA04740	330	0.79	1.85	0	0	0	678	tags=2%, list=4%, signal=2%
2	CYTOKINE-CYTOKINE RECEPTOR INTERACTION%KEGG%HSA04060	221	0.8	1.8	0	0	0.001	966	tags=16%, list=6%, signal=17%
3	NATURAL KILLER CELL MEDIATED CYTOTOXICITY%KEGG%HSA04650	95	0.84	1.72	0	0.002	0.005	960	tags=28%, list=6%, signal=30%
4	OSTEOCLAST DIFFERENTIATION%KEGG%HSA04380	114	0.78	1.65	0.001	0.022	0.075	1166	tags=25%, list=7%, signal=26%
5	CALCIUM SIGNALING PATHWAY%KEGG%HSA04020	155	0.75	1.62	0	0.039	0.162	1972	tags=21%, list=11%, signal=24%
6	B CELL RECEPTOR SIGNALING PATHWAY%KEGG%HSA04662	74	0.8	1.59	0.003	0.069	0.311	1383	tags=31%, list=8%, signal=34%
7	TUBERCULOSIS%KEGG%HSA05152	148	0.74	1.58	0.001	0.075	0.373	1814	tags=33%, list=10%, signal=37%
8	STARCH AND SUCROSE METABOLISM%KEGG%HSA00500	44	0.85	1.58	0.007	0.067	0.377	1523	tags=23%, list=9%, signal=25%
9	STEROID BIOSYNTHESIS%KEGG%HSA00100	16	0.93	1.54	0.005	0.142	0.682	3	tags=6%, list=0%, signal=6%
10	COMPLEMENT AND COAGULATION CASCADES%KEGG%HSA04610	62	0.78	1.53	0.017	0.148	0.728	2085	tags=18%, list=12%, signal=20%
11	MALARIA%KEGG%HSA05144	45	0.81	1.53	0.016	0.139	0.74	2219	tags=42%, list=13%, signal=48%
12	NEUROACTIVE LIGAND-RECEPTOR INTERACTION%KEGG%HSA04080	252	0.68	1.53	0.002	0.135	0.758	2065	tags=11%, list=12%, signal=12%
13	JAK-STAT SIGNALING PATHWAY%KEGG%HSA04630	131	0.72	1.53	0.007	0.135	0.78	1313	tags=22%, list=8%, signal=24%
14	STAPHYLOCOCCUS AUREUS INFECTION%KEGG%HSA05150	39	0.8	1.51	0.025	0.174	0.877	1152	tags=28%, list=7%, signal=30%
15	AMYOTROPHIC LATERAL SCLEROSIS (ALS)%KEGG%HSA05014	50	0.79	1.5	0.013	0.171	0.892	1233	tags=18%, list=7%, signal=19%
16	APOPTOSIS%KEGG%HSA04210	75	0.74	1.49	0.015	0.182	0.919	1753	tags=35%, list=10%, signal=38%
17	GRAFT-VERSUS-HOST DISEASE%KEGG%HSA05332	21	0.87	1.49	0.025	0.182	0.928	617	tags=38%, list=4%, signal=39%
18	CHAGAS DISEASE (AMERICAN TRYPANOSOMIASIS)%KEGG%HSA05142	92	0.73	1.49	0.018	0.179	0.937	1753	tags=36%, list=10%, signal=40%
19	NOD-LIKE RECEPTOR SIGNALING PATHWAY%KEGG%HSA04621	51	0.77	1.47	0.026	0.199	0.962	696	tags=18%, list=4%, signal=18%
20	LEUKOCYTE TRANSENDOTHELIAL MIGRATION%KEGG%HSA04670	104	0.71	1.46	0.021	0.214	0.973	943	tags=17%, list=5%, signal=18%
21	RHEUMATOID ARTHRITIS%KEGG%HSA05323	78	0.73	1.46	0.024	0.227	0.982	1753	tags=28%, list=10%, signal=31%
22	TOXOPLASMOSIS%KEGG%HSA05145	113	0.68	1.43	0.033	0.294	0.998	2457	tags=33%, list=14%, signal=38%
23	EPITHELIAL CELL SIGNALING IN HELICOBACTER PYLORI INFECTION%KEGG%HSA05120	66	0.72	1.42	0.053	0.298	0.998	1746	tags=26%, list=10%, signal=29%
24	GLYCOSAMINOGLYCAN BIOSYNTHESIS - CHONDROITIN SULFATE%KEGG%HSA00532	20	0.83	1.42	0.063	0.296	0.998	1389	tags=35%, list=8%, signal=38%
25	LEISHMANIASIS%KEGG%HSA05140	59	0.73	1.41	0.039	0.314	0.998	2366	tags=42%, list=14%, signal=49%
26	CYTOSOLIC DNA-SENSING PATHWAY%KEGG%HSA04623	47	0.73	1.4	0.066	0.313	0.999	1912	tags=28%, list=11%, signal=31%
27	CELL ADHESION MOLECULES (CAMS)%KEGG%HSA04514	112	0.68	1.4	0.047	0.317	0.999	1263	tags=16%, list=7%, signal=17%
28	ASTHMA%KEGG%HSA05310	20	0.81	1.4	0.072	0.309	0.999	2650	tags=40%, list=15%, signal=47%
29	RIBOSOME%KEGG%HSA03010	73	0.7	1.4	0.046	0.299	0.999	3925	tags=74%, list=23%, signal=95%
30	CHEMOKINE SIGNALING PATHWAY%KEGG%HSA04062	169	0.64	1.39	0.024	0.308	0.999	1802	tags=20%, list=10%, signal=22%
31	AXON GUIDANCE%KEGG%HSA04360	116	0.65	1.37	0.036	0.346	1	1368	tags=16%, list=8%, signal=17%
32	GLYCOSPHINGOLIPID BIOSYNTHESIS - LACTO AND NEOLACTO SERIES%KEGG%HSA00601	22	0.79	1.37	0.106	0.342	1	1454	tags=36%, list=8%, signal=40%
33	T CELL RECEPTOR SIGNALING PATHWAY%KEGG%HSA04660	106	0.66	1.37	0.053	0.345	1	1444	tags=19%, list=8%, signal=20%
34	ANTIGEN PROCESSING AND PRESENTATION%KEGG%HSA04612	48	0.73	1.36	0.087	0.349	1	598	tags=15%, list=3%, signal=15%
35	SPHINGOLIPID METABOLISM%KEGG%HSA00600	39	0.73	1.36	0.106	0.339	1	2172	tags=23%, list=13%, signal=26%
36	INSULIN SIGNALING PATHWAY%KEGG%HSA04910	135	0.63	1.36	0.048	0.332	1	1131	tags=14%, list=7%, signal=15%
37	TYROSINE METABOLISM%KEGG%HSA00350	39	0.73	1.36	0.093	0.33	1	794	tags=5%, list=5%, signal=5%
38	MATURITY ONSET DIABETES OF THE YOUNG%KEGG%HSA04950	25	0.78	1.36	0.099	0.323	1	736	tags=4%, list=4%, signal=4%
39	FC EPSILON RI SIGNALING PATHWAY%KEGG%HSA04664	76	0.67	1.35	0.085	0.324	1	943	tags=16%, list=5%, signal=17%
40	TYPE II DIABETES MELLITUS%KEGG%HSA04930	41	0.73	1.35	0.101	0.328	1	943	tags=20%, list=5%, signal=21%
41	HEMATOPOIETIC CELL LINEAGE%KEGG%HSA04640	76	0.68	1.35	0.087	0.32	1	733	tags=22%, list=4%, signal=23%
42	MTOR SIGNALING PATHWAY%KEGG%HSA04150	52	0.69	1.34	0.104	0.333	1	1164	tags=13%, list=7%, signal=14%
43	ALLOGRAFT REJECTION%KEGG%HSA05330	23	0.77	1.33	0.14	0.336	1	1085	tags=26%, list=6%, signal=28%
44	RENIN-ANGIOTENSIN SYSTEM%KEGG%HSA04614	17	0.79	1.33	0.137	0.343	1	1920	tags=29%, list=11%, signal=33%
45	TOLL-LIKE RECEPTOR SIGNALING PATHWAY%KEGG%HSA04620	84	0.65	1.32	0.089	0.355	1	2454	tags=40%, list=14%, signal=47%
46	STEROID HORMONE BIOSYNTHESIS%KEGG%HSA00140	40	0.71	1.32	0.126	0.358	1	3849	tags=18%, list=22%, signal=22%
47	TYPE I DIABETES MELLITUS%KEGG%HSA04940	29	0.72	1.3	0.157	0.383	1	617	tags=21%, list=4%, signal=21%
48	AUTOIMMUNE THYROID DISEASE%KEGG%HSA05320	25	0.73	1.3	0.161	0.383	1	1085	tags=20%, list=6%, signal=21%
49	REGULATION OF AUTOPHAGY%KEGG%HSA04140	20	0.76	1.29	0.181	0.404	1	1505	tags=25%, list=9%, signal=27%
50	GALACTOSE METABOLISM%KEGG%HSA00052	27	0.72	1.28	0.183	0.404	1	1454	tags=22%, list=8%, signal=24%
51	OTHER GLYCAN DEGRADATION%KEGG%HSA00511	17	0.76	1.28	0.181	0.403	1	2210	tags=47%, list=13%, signal=54%
52	GLYCOSAMINOGLYCAN DEGRADATION%KEGG%HSA00531	17	0.76	1.27	0.197	0.423	1	2207	tags=29%, list=13%, signal=34%
53	PHENYLALANINE METABOLISM%KEGG%HSA00360	17	0.76	1.26	0.191	0.44	1	85	tags=6%, list=0%, signal=6%
54	AMINO SUGAR AND NUCLEOTIDE SUGAR METABOLISM%KEGG%HSA00520	42	0.67	1.25	0.176	0.443	1	2925	tags=36%, list=17%, signal=43%
55	PANCREATIC SECRETION%KEGG%HSA04972	92	0.61	1.25	0.154	0.45	1	793	tags=10%, list=5%, signal=10%
56	LYSOSOME%KEGG%HSA04142	111	0.59	1.25	0.135	0.447	1	2493	tags=43%, list=14%, signal=50%
57	NEUROTROPHIN SIGNALING PATHWAY%KEGG%HSA04722	125	0.58	1.24	0.145	0.452	1	2280	tags=28%, list=13%, signal=32%
58	VEGF SIGNALING PATHWAY%KEGG%HSA04370	74	0.61	1.24	0.181	0.45	1	2457	tags=27%, list=14%, signal=31%
59	FC GAMMA R-MEDIATED PHAGOCYTOSIS%KEGG%HSA04666	88	0.61	1.24	0.162	0.446	1	1820	tags=19%, list=11%, signal=21%
60	GLIOMA%KEGG%HSA05214	62	0.63	1.23	0.18	0.454	1	1164	tags=23%, list=7%, signal=24%
61	SMALL CELL LUNG CANCER%KEGG%HSA05222	82	0.61	1.22	0.181	0.46	1	1383	tags=16%, list=8%, signal=17%
62	PRION DISEASES%KEGG%HSA05020	33	0.67	1.21	0.258	0.497	1	678	tags=21%, list=4%, signal=22%
63	PHAGOSOME%KEGG%HSA04145	125	0.57	1.2	0.19	0.51	1	2093	tags=30%, list=12%, signal=33%
64	PRIMARY BILE ACID BIOSYNTHESIS%KEGG%HSA00120	16	0.71	1.18	0.284	0.542	1	1712	tags=19%, list=10%, signal=21%
65	NICOTINATE AND NICOTINAMIDE METABOLISM%KEGG%HSA00760	16	0.7	1.18	0.295	0.541	1	1881	tags=31%, list=11%, signal=35%
66	ERBB SIGNALING PATHWAY%KEGG%HSA04012	86	0.58	1.18	0.234	0.541	1	972	tags=15%, list=6%, signal=16%
67	TRYPTOPHAN METABOLISM%KEGG%HSA00380	39	0.63	1.17	0.265	0.535	1	1455	tags=13%, list=8%, signal=14%
68	GASTRIC ACID SECRETION%KEGG%HSA04971	66	0.59	1.17	0.234	0.546	1	1693	tags=21%, list=10%, signal=23%
69	HISTIDINE METABOLISM%KEGG%HSA00340	29	0.66	1.17	0.281	0.54	1	1562	tags=14%, list=9%, signal=15%
70	VIRAL MYOCARDITIS%KEGG%HSA05416	55	0.6	1.16	0.267	0.553	1	1233	tags=18%, list=7%, signal=20%
71	AFRICAN TRYPANOSOMIASIS%KEGG%HSA05143	32	0.63	1.16	0.296	0.551	1	894	tags=28%, list=5%, signal=30%
72	CHOLINERGIC SYNAPSE%KEGG%HSA04725	94	0.57	1.15	0.261	0.556	1	1815	tags=20%, list=10%, signal=22%
73	LONG-TERM POTENTIATION%KEGG%HSA04720	64	0.58	1.15	0.272	0.554	1	1878	tags=23%, list=11%, signal=26%
74	AMOEBIASIS%KEGG%HSA05146	93	0.55	1.14	0.251	0.56	1	1940	tags=19%, list=11%, signal=22%
75	OTHER TYPES OF O-GLYCAN BIOSYNTHESIS%KEGG%HSA00514	37	0.62	1.14	0.32	0.563	1	1454	tags=11%, list=8%, signal=12%
76	CARBOHYDRATE DIGESTION AND ABSORPTION%KEGG%HSA04973	38	0.61	1.11	0.336	0.61	1	2454	tags=21%, list=14%, signal=24%
77	FRUCTOSE AND MANNOSE METABOLISM%KEGG%HSA00051	35	0.6	1.11	0.328	0.617	1	3837	tags=43%, list=22%, signal=55%
78	RENAL CELL CARCINOMA%KEGG%HSA05211	69	0.56	1.11	0.322	0.614	1	2691	tags=26%, list=16%, signal=31%
79	PATHWAYS IN CANCER%KEGG%HSA05200	317	0.48	1.1	0.258	0.619	1	1492	tags=14%, list=9%, signal=15%
80	REGULATION OF ACTIN CYTOSKELETON%KEGG%HSA04810	205	0.49	1.1	0.299	0.62	1	1068	tags=12%, list=6%, signal=13%
81	PANCREATIC CANCER%KEGG%HSA05212	69	0.55	1.08	0.345	0.647	1	2280	tags=32%, list=13%, signal=37%
82	MAPK SIGNALING PATHWAY%KEGG%HSA04010	245	0.48	1.08	0.301	0.643	1	2203	tags=17%, list=13%, signal=19%
83	FOCAL ADHESION%KEGG%HSA04510	193	0.49	1.07	0.331	0.654	1	1164	tags=12%, list=7%, signal=13%
84	ALDOSTERONE-REGULATED SODIUM REABSORPTION%KEGG%HSA04960	42	0.57	1.07	0.375	0.651	1	1164	tags=19%, list=7%, signal=20%
85	GNRH SIGNALING PATHWAY%KEGG%HSA04912	88	0.52	1.05	0.39	0.678	1	2203	tags=25%, list=13%, signal=29%
86	GLYCOSYLPHOSPHATIDYLINOSITOL(GPI)-ANCHOR BIOSYNTHESIS%KEGG%HSA00563	25	0.6	1.05	0.415	0.674	1	2244	tags=40%, list=13%, signal=46%
87	MINERAL ABSORPTION%KEGG%HSA04978	44	0.56	1.05	0.422	0.673	1	1002	tags=16%, list=6%, signal=17%
88	PROTEASOME%KEGG%HSA03050	43	0.56	1.04	0.423	0.68	1	383	tags=9%, list=2%, signal=9%
89	BLADDER CANCER%KEGG%HSA05219	41	0.56	1.04	0.426	0.688	1	2283	tags=29%, list=13%, signal=34%
90	INFLUENZA A%KEGG%HSA05164	135	0.48	1.02	0.439	0.724	1	1396	tags=19%, list=8%, signal=21%
91	PRIMARY IMMUNODEFICIENCY%KEGG%HSA05340	34	0.56	1.01	0.446	0.72	1	2533	tags=35%, list=15%, signal=41%
92	ENDOCYTOSIS%KEGG%HSA04144	185	0.46	1.01	0.432	0.72	1	2547	tags=21%, list=15%, signal=24%
93	ADIPOCYTOKINE SIGNALING PATHWAY%KEGG%HSA04920	69	0.51	1	0.469	0.743	1	2855	tags=30%, list=17%, signal=36%
94	SALIVARY SECRETION%KEGG%HSA04970	72	0.5	1	0.479	0.738	1	1638	tags=21%, list=9%, signal=23%
95	INTESTINAL IMMUNE NETWORK FOR IGA PRODUCTION%KEGG%HSA04672	39	0.55	0.99	0.496	0.74	1	2442	tags=23%, list=14%, signal=27%
96	SNARE INTERACTIONS IN VESICULAR TRANSPORT%KEGG%HSA04130	29	0.54	0.98	0.503	0.758	1	3883	tags=48%, list=22%, signal=62%
97	NON-SMALL CELL LUNG CANCER%KEGG%HSA05223	53	0.5	0.97	0.505	0.775	1	2454	tags=28%, list=14%, signal=33%
98	PROTEIN PROCESSING IN ENDOPLASMIC RETICULUM%KEGG%HSA04141	146	0.44	0.95	0.549	0.797	1	2006	tags=20%, list=12%, signal=22%
99	ECM-RECEPTOR INTERACTION%KEGG%HSA04512	83	0.47	0.95	0.535	0.792	1	329	tags=6%, list=2%, signal=6%
100	SYSTEMIC LUPUS ERYTHEMATOSUS%KEGG%HSA05322	100	0.46	0.95	0.552	0.795	1	2105	tags=17%, list=12%, signal=19%
101	TGF-BETA SIGNALING PATHWAY%KEGG%HSA04350	82	0.46	0.94	0.542	0.796	1	1077	tags=9%, list=6%, signal=9%
102	AMINOACYL-TRNA BIOSYNTHESIS%KEGG%HSA00970	39	0.51	0.94	0.541	0.79	1	4336	tags=56%, list=25%, signal=75%
103	P53 SIGNALING PATHWAY%KEGG%HSA04115	62	0.48	0.94	0.543	0.783	1	1233	tags=16%, list=7%, signal=17%
104	DRUG METABOLISM - OTHER ENZYMES%KEGG%HSA00983	39	0.51	0.94	0.56	0.779	1	710	tags=8%, list=4%, signal=8%
105	DILATED CARDIOMYOPATHY%KEGG%HSA05414	79	0.47	0.94	0.566	0.779	1	895	tags=11%, list=5%, signal=12%
106	PORPHYRIN AND CHLOROPHYLL METABOLISM%KEGG%HSA00860	37	0.51	0.93	0.579	0.778	1	2362	tags=22%, list=14%, signal=25%
107	ARACHIDONIC ACID METABOLISM%KEGG%HSA00590	54	0.49	0.93	0.565	0.781	1	1682	tags=13%, list=10%, signal=14%
108	CHRONIC MYELOID LEUKEMIA%KEGG%HSA05220	71	0.47	0.93	0.567	0.774	1	2103	tags=24%, list=12%, signal=27%
109	COLLECTING DUCT ACID SECRETION%KEGG%HSA04966	27	0.52	0.93	0.55	0.77	1	2473	tags=33%, list=14%, signal=39%
110	HYPERTROPHIC CARDIOMYOPATHY (HCM)%KEGG%HSA05410	74	0.46	0.93	0.566	0.764	1	977	tags=12%, list=6%, signal=13%
111	GLYCOLYSIS / GLUCONEOGENESIS%KEGG%HSA00010	58	0.48	0.92	0.574	0.764	1	1523	tags=14%, list=9%, signal=15%
112	VIBRIO CHOLERAE INFECTION%KEGG%HSA05110	51	0.49	0.92	0.584	0.763	1	1628	tags=27%, list=9%, signal=30%
113	ALANINE, ASPARTATE AND GLUTAMATE METABOLISM%KEGG%HSA00250	31	0.51	0.92	0.576	0.763	1	2018	tags=16%, list=12%, signal=18%
114	PENTOSE AND GLUCURONATE INTERCONVERSIONS%KEGG%HSA00040	26	0.51	0.91	0.581	0.761	1	2067	tags=15%, list=12%, signal=17%
115	ALZHEIMER'S DISEASE%KEGG%HSA05010	144	0.42	0.9	0.64	0.785	1	2342	tags=20%, list=14%, signal=23%
116	MELANOMA%KEGG%HSA05218	70	0.44	0.87	0.662	0.832	1	1164	tags=11%, list=7%, signal=12%
117	PHOTOTRANSDUCTION%KEGG%HSA04744	21	0.51	0.87	0.666	0.828	1	3834	tags=29%, list=22%, signal=37%
118	MEASLES%KEGG%HSA05162	112	0.41	0.87	0.689	0.823	1	1462	tags=19%, list=8%, signal=20%
119	SELENOCOMPOUND METABOLISM%KEGG%HSA00450	16	0.52	0.86	0.677	0.831	1	3469	tags=56%, list=20%, signal=70%
120	N-GLYCAN BIOSYNTHESIS%KEGG%HSA00510	45	0.46	0.86	0.688	0.829	1	2617	tags=31%, list=15%, signal=37%
121	RIG-I-LIKE RECEPTOR SIGNALING PATHWAY%KEGG%HSA04622	56	0.44	0.85	0.687	0.832	1	1753	tags=18%, list=10%, signal=20%
122	FATTY ACID METABOLISM%KEGG%HSA00071	40	0.45	0.84	0.677	0.835	1	3689	tags=40%, list=21%, signal=51%
123	PATHOGENIC ESCHERICHIA COLI INFECTION%KEGG%HSA05130	51	0.44	0.84	0.698	0.83	1	2813	tags=41%, list=16%, signal=49%
124	PENTOSE PHOSPHATE PATHWAY%KEGG%HSA00030	27	0.47	0.84	0.689	0.837	1	4195	tags=30%, list=24%, signal=39%
125	GAP JUNCTION%KEGG%HSA04540	78	0.4	0.81	0.77	0.882	1	1638	tags=17%, list=9%, signal=18%
126	RNA POLYMERASE%KEGG%HSA03020	28	0.46	0.8	0.735	0.878	1	4301	tags=54%, list=25%, signal=71%
127	COLORECTAL CANCER%KEGG%HSA05210	61	0.41	0.8	0.757	0.873	1	972	tags=18%, list=6%, signal=19%
128	PROTEIN DIGESTION AND ABSORPTION%KEGG%HSA04974	76	0.39	0.78	0.805	0.903	1	436	tags=4%, list=3%, signal=4%
129	PURINE METABOLISM%KEGG%HSA00230	156	0.36	0.78	0.848	0.896	1	784	tags=8%, list=5%, signal=8%
130	PROGESTERONE-MEDIATED OOCYTE MATURATION%KEGG%HSA04914	71	0.39	0.78	0.805	0.893	1	2088	tags=17%, list=12%, signal=19%
131	GLYCOSAMINOGLYCAN BIOSYNTHESIS - HEPARAN SULFATE%KEGG%HSA00534	25	0.44	0.77	0.778	0.898	1	3204	tags=28%, list=19%, signal=34%
132	OOCYTE MEIOSIS%KEGG%HSA04114	98	0.37	0.76	0.87	0.908	1	1164	tags=13%, list=7%, signal=14%
133	ENDOCRINE AND OTHER FACTOR-REGULATED CALCIUM REABSORPTION%KEGG%HSA04961	45	0.39	0.74	0.829	0.928	1	1581	tags=13%, list=9%, signal=15%
134	PROPANOATE METABOLISM%KEGG%HSA00640	30	0.42	0.74	0.818	0.925	1	3506	tags=33%, list=20%, signal=42%
135	LONG-TERM DEPRESSION%KEGG%HSA04730	57	0.37	0.71	0.884	0.953	1	2074	tags=18%, list=12%, signal=20%
136	PYRIMIDINE METABOLISM%KEGG%HSA00240	95	0.35	0.71	0.919	0.951	1	2698	tags=21%, list=16%, signal=25%
137	VASCULAR SMOOTH MUSCLE CONTRACTION%KEGG%HSA04270	103	0.34	0.71	0.938	0.945	1	1682	tags=13%, list=10%, signal=14%
138	HUNTINGTON'S DISEASE%KEGG%HSA05016	156	0.32	0.7	0.967	0.943	1	1734	tags=12%, list=10%, signal=13%
139	OXIDATIVE PHOSPHORYLATION%KEGG%HSA00190	112	0.33	0.68	0.954	0.963	1	1628	tags=13%, list=9%, signal=14%
140	CIRCADIAN RHYTHM - MAMMAL%KEGG%HSA04710	22	0.39	0.68	0.891	0.961	1	1191	tags=23%, list=7%, signal=24%
141	VASOPRESSIN-REGULATED WATER REABSORPTION%KEGG%HSA04962	42	0.34	0.64	0.932	0.98	1	2913	tags=26%, list=17%, signal=31%
142	VITAMIN DIGESTION AND ABSORPTION%KEGG%HSA04977	23	0.37	0.64	0.918	0.979	1	2159	tags=13%, list=12%, signal=15%
143	PYRUVATE METABOLISM%KEGG%HSA00620	37	0.34	0.62	0.946	0.98	1	1833	tags=11%, list=11%, signal=12%
144	GLYOXYLATE AND DICARBOXYLATE METABOLISM%KEGG%HSA00630	18	0.35	0.59	0.943	0.989	1	1155	tags=11%, list=7%, signal=12%
145	PROTEIN EXPORT%KEGG%HSA03060	23	0.33	0.57	0.975	0.989	1	4916	tags=43%, list=28%, signal=61%

## Sheet: JAK3_vs JAK3HOXA9
NAME	GeneSet	SIZE	ES	NES	NOM p-val	FDR q-val	FWER p-val	RANK AT MAX	LEADING EDGE
RIBOSOME%KEGG%HSA03010	RIBOSOME%KEGG%HSA03010	73	0.748826	1.91957	0.00562852	0.461152	0.35	2958	tags=88%, list=17%, signal=105%
STARCH AND SUCROSE METABOLISM%KEGG%HSA00500	STARCH AND SUCROSE METABOLISM%KEGG%HSA00500	44	0.795742	1.87518	0.00823045	0.283233	0.411	383	tags=14%, list=2%, signal=14%
ASTHMA%KEGG%HSA05310	ASTHMA%KEGG%HSA05310	20	0.90193	1.85354	0.00416667	0.205474	0.439	716	tags=45%, list=4%, signal=47%
ARACHIDONIC ACID METABOLISM%KEGG%HSA00590	ARACHIDONIC ACID METABOLISM%KEGG%HSA00590	54	0.7457	1.82986	0.00389864	0.165783	0.462	2234	tags=22%, list=13%, signal=25%
ALLOGRAFT REJECTION%KEGG%HSA05330	ALLOGRAFT REJECTION%KEGG%HSA05330	23	0.83636	1.77295	0.00399202	0.156518	0.518	1300	tags=43%, list=8%, signal=47%
AUTOIMMUNE THYROID DISEASE%KEGG%HSA05320	AUTOIMMUNE THYROID DISEASE%KEGG%HSA05320	25	0.806288	1.7349	0.00606061	0.146339	0.554	1278	tags=28%, list=7%, signal=30%
ADIPOCYTOKINE SIGNALING PATHWAY%KEGG%HSA04920	ADIPOCYTOKINE SIGNALING PATHWAY%KEGG%HSA04920	69	0.683906	1.72769	0.0112782	0.127728	0.565	2818	tags=38%, list=16%, signal=45%
GRAFT-VERSUS-HOST DISEASE%KEGG%HSA05332	GRAFT-VERSUS-HOST DISEASE%KEGG%HSA05332	21	0.807517	1.71731	0.00201207	0.115578	0.575	1919	tags=43%, list=11%, signal=48%
RHEUMATOID ARTHRITIS%KEGG%HSA05323	RHEUMATOID ARTHRITIS%KEGG%HSA05323	78	0.658505	1.69688	0.0139165	0.110694	0.604	1845	tags=28%, list=11%, signal=31%
OSTEOCLAST DIFFERENTIATION%KEGG%HSA04380	OSTEOCLAST DIFFERENTIATION%KEGG%HSA04380	114	0.627873	1.6733	0.0167286	0.109397	0.641	2124	tags=43%, list=12%, signal=49%
INTESTINAL IMMUNE NETWORK FOR IGA PRODUCTION%KEGG%HSA04672	INTESTINAL IMMUNE NETWORK FOR IGA PRODUCTION%KEGG%HSA04672	39	0.719867	1.67269	0.00399202	0.0997376	0.642	1845	tags=41%, list=11%, signal=46%
JAK-STAT SIGNALING PATHWAY%KEGG%HSA04630	JAK-STAT SIGNALING PATHWAY%KEGG%HSA04630	131	0.601481	1.65944	0.0180505	0.097773	0.674	2358	tags=27%, list=14%, signal=31%
TYPE I DIABETES MELLITUS%KEGG%HSA04940	TYPE I DIABETES MELLITUS%KEGG%HSA04940	29	0.754268	1.65832	0.0125523	0.0907416	0.676	2825	tags=48%, list=16%, signal=58%
TOXOPLASMOSIS%KEGG%HSA05145	TOXOPLASMOSIS%KEGG%HSA05145	113	0.608524	1.64807	0.00753296	0.0883664	0.695	1378	tags=26%, list=8%, signal=28%
B CELL RECEPTOR SIGNALING PATHWAY%KEGG%HSA04662	B CELL RECEPTOR SIGNALING PATHWAY%KEGG%HSA04662	74	0.636904	1.64642	0.00996016	0.0830222	0.695	1977	tags=39%, list=11%, signal=44%
GALACTOSE METABOLISM%KEGG%HSA00052	GALACTOSE METABOLISM%KEGG%HSA00052	27	0.753253	1.6267	0.0140281	0.0862032	0.727	1495	tags=26%, list=9%, signal=28%
CYTOKINE-CYTOKINE RECEPTOR INTERACTION%KEGG%HSA04060	CYTOKINE-CYTOKINE RECEPTOR INTERACTION%KEGG%HSA04060	221	0.561492	1.62458	0.0126126	0.0818914	0.732	2684	tags=29%, list=16%, signal=33%
LEISHMANIASIS%KEGG%HSA05140	LEISHMANIASIS%KEGG%HSA05140	59	0.677952	1.62407	0.0191939	0.0774033	0.733	1318	tags=39%, list=8%, signal=42%
MATURITY ONSET DIABETES OF THE YOUNG%KEGG%HSA04950	MATURITY ONSET DIABETES OF THE YOUNG%KEGG%HSA04950	25	0.751994	1.62177	0.0138889	0.0742289	0.739	214	tags=4%, list=1%, signal=4%
FAT DIGESTION AND ABSORPTION%KEGG%HSA04975	FAT DIGESTION AND ABSORPTION%KEGG%HSA04975	44	0.681447	1.6208	0.00556586	0.071201	0.745	1305	tags=16%, list=8%, signal=17%
INFLUENZA A%KEGG%HSA05164	INFLUENZA A%KEGG%HSA05164	135	0.577113	1.58974	0.0233813	0.0809359	0.806	1378	tags=26%, list=8%, signal=28%
NOD-LIKE RECEPTOR SIGNALING PATHWAY%KEGG%HSA04621	NOD-LIKE RECEPTOR SIGNALING PATHWAY%KEGG%HSA04621	51	0.658672	1.58974	0.0117417	0.077257	0.806	1949	tags=41%, list=11%, signal=46%
HEMATOPOIETIC CELL LINEAGE%KEGG%HSA04640	HEMATOPOIETIC CELL LINEAGE%KEGG%HSA04640	76	0.623422	1.58866	0.00724638	0.0742155	0.806	2627	tags=37%, list=15%, signal=43%
CELL ADHESION MOLECULES (CAMS)%KEGG%HSA04514	CELL ADHESION MOLECULES (CAMS)%KEGG%HSA04514	112	0.577329	1.55159	0.0189036	0.0904114	0.889	1713	tags=21%, list=10%, signal=24%
ANTIGEN PROCESSING AND PRESENTATION%KEGG%HSA04612	ANTIGEN PROCESSING AND PRESENTATION%KEGG%HSA04612	48	0.644036	1.53755	0.0204082	0.0948004	0.915	2005	tags=42%, list=12%, signal=47%
MALARIA%KEGG%HSA05144	MALARIA%KEGG%HSA05144	45	0.646047	1.52038	0.0325048	0.101695	0.938	3081	tags=56%, list=18%, signal=67%
STAPHYLOCOCCUS AUREUS INFECTION%KEGG%HSA05150	STAPHYLOCOCCUS AUREUS INFECTION%KEGG%HSA05150	39	0.65443	1.51969	0.024	0.0982869	0.94	1531	tags=31%, list=9%, signal=34%
VIRAL MYOCARDITIS%KEGG%HSA05416	VIRAL MYOCARDITIS%KEGG%HSA05416	55	0.63477	1.51341	0.0191571	0.0996125	0.949	1531	tags=18%, list=9%, signal=20%
EPITHELIAL CELL SIGNALING IN HELICOBACTER PYLORI INFECTION%KEGG%HSA05120	EPITHELIAL CELL SIGNALING IN HELICOBACTER PYLORI INFECTION%KEGG%HSA05120	66	0.60212	1.50432	0.0335968	0.101913	0.956	1458	tags=27%, list=8%, signal=30%
PHAGOSOME%KEGG%HSA04145	PHAGOSOME%KEGG%HSA04145	125	0.545134	1.47405	0.0276753	0.122944	0.97	2463	tags=31%, list=14%, signal=36%
MAPK SIGNALING PATHWAY%KEGG%HSA04010	MAPK SIGNALING PATHWAY%KEGG%HSA04010	245	0.497149	1.45921	0.0244755	0.131378	0.983	2124	tags=25%, list=12%, signal=28%
PHOSPHATIDYLINOSITOL SIGNALING SYSTEM%KEGG%HSA04070	PHOSPHATIDYLINOSITOL SIGNALING SYSTEM%KEGG%HSA04070	76	0.566418	1.45006	0.0307692	0.135026	0.989	2730	tags=37%, list=16%, signal=44%
TUBERCULOSIS%KEGG%HSA05152	TUBERCULOSIS%KEGG%HSA05152	148	0.522767	1.44961	0.0221402	0.1312	0.99	2848	tags=43%, list=16%, signal=51%
FC EPSILON RI SIGNALING PATHWAY%KEGG%HSA04664	FC EPSILON RI SIGNALING PATHWAY%KEGG%HSA04664	76	0.559369	1.43394	0.0315399	0.142052	0.994	1958	tags=25%, list=11%, signal=28%
NITROGEN METABOLISM%KEGG%HSA00910	NITROGEN METABOLISM%KEGG%HSA00910	22	0.681523	1.43195	0.0533881	0.139853	0.995	3294	tags=36%, list=19%, signal=45%
TYPE II DIABETES MELLITUS%KEGG%HSA04930	TYPE II DIABETES MELLITUS%KEGG%HSA04930	41	0.613827	1.42723	0.04	0.140147	0.995	1958	tags=27%, list=11%, signal=30%
LYSOSOME%KEGG%HSA04142	LYSOSOME%KEGG%HSA04142	111	0.526866	1.42353	0.026738	0.139791	0.995	2579	tags=34%, list=15%, signal=40%
TOLL-LIKE RECEPTOR SIGNALING PATHWAY%KEGG%HSA04620	TOLL-LIKE RECEPTOR SIGNALING PATHWAY%KEGG%HSA04620	84	0.534004	1.37244	0.0366089	0.190674	1	3045	tags=46%, list=18%, signal=56%
NEUROACTIVE LIGAND-RECEPTOR INTERACTION%KEGG%HSA04080	NEUROACTIVE LIGAND-RECEPTOR INTERACTION%KEGG%HSA04080	252	0.461279	1.35612	0.0174825	0.205682	1	2198	tags=10%, list=13%, signal=11%
INOSITOL PHOSPHATE METABOLISM%KEGG%HSA00562	INOSITOL PHOSPHATE METABOLISM%KEGG%HSA00562	56	0.555379	1.35051	0.0718232	0.207885	1	3051	tags=38%, list=18%, signal=45%
VITAMIN DIGESTION AND ABSORPTION%KEGG%HSA04977	VITAMIN DIGESTION AND ABSORPTION%KEGG%HSA04977	23	0.631358	1.31897	0.121857	0.245509	1	1933	tags=22%, list=11%, signal=24%
RIG-I-LIKE RECEPTOR SIGNALING PATHWAY%KEGG%HSA04622	RIG-I-LIKE RECEPTOR SIGNALING PATHWAY%KEGG%HSA04622	56	0.533732	1.31085	0.0849421	0.251309	1	1723	tags=23%, list=10%, signal=26%
GLYCOSAMINOGLYCAN BIOSYNTHESIS - CHONDROITIN SULFATE%KEGG%HSA00532	GLYCOSAMINOGLYCAN BIOSYNTHESIS - CHONDROITIN SULFATE%KEGG%HSA00532	20	0.641165	1.30623	0.114398	0.252014	1	2905	tags=40%, list=17%, signal=48%
SHIGELLOSIS%KEGG%HSA05131	SHIGELLOSIS%KEGG%HSA05131	61	0.527263	1.29776	0.110895	0.258756	1	3005	tags=39%, list=17%, signal=47%
AFRICAN TRYPANOSOMIASIS%KEGG%HSA05143	AFRICAN TRYPANOSOMIASIS%KEGG%HSA05143	32	0.582554	1.29309	0.116232	0.260721	1	3126	tags=53%, list=18%, signal=65%
GLYCOLYSIS / GLUCONEOGENESIS%KEGG%HSA00010	GLYCOLYSIS / GLUCONEOGENESIS%KEGG%HSA00010	58	0.520608	1.2898	0.0856031	0.259695	1	899	tags=16%, list=5%, signal=16%
FRUCTOSE AND MANNOSE METABOLISM%KEGG%HSA00051	FRUCTOSE AND MANNOSE METABOLISM%KEGG%HSA00051	35	0.568049	1.28753	0.104536	0.257543	1	2556	tags=29%, list=15%, signal=33%
CARBOHYDRATE DIGESTION AND ABSORPTION%KEGG%HSA04973	CARBOHYDRATE DIGESTION AND ABSORPTION%KEGG%HSA04973	38	0.559489	1.2812	0.126789	0.261498	1	998	tags=13%, list=6%, signal=14%
NATURAL KILLER CELL MEDIATED CYTOTOXICITY%KEGG%HSA04650	NATURAL KILLER CELL MEDIATED CYTOTOXICITY%KEGG%HSA04650	95	0.482524	1.27638	0.0605469	0.263348	1	3140	tags=36%, list=18%, signal=43%
GLYCEROLIPID METABOLISM%KEGG%HSA00561	GLYCEROLIPID METABOLISM%KEGG%HSA00561	48	0.528983	1.26748	0.135659	0.27151	1	3400	tags=31%, list=20%, signal=39%
MINERAL ABSORPTION%KEGG%HSA04978	MINERAL ABSORPTION%KEGG%HSA04978	44	0.53418	1.25389	0.142857	0.286815	1	3103	tags=30%, list=18%, signal=36%
PRIMARY IMMUNODEFICIENCY%KEGG%HSA05340	PRIMARY IMMUNODEFICIENCY%KEGG%HSA05340	34	0.559754	1.25314	0.148776	0.282728	1	1682	tags=32%, list=10%, signal=36%
BACTERIAL INVASION OF EPITHELIAL CELLS%KEGG%HSA05100	BACTERIAL INVASION OF EPITHELIAL CELLS%KEGG%HSA05100	65	0.504146	1.24622	0.126812	0.288945	1	3139	tags=43%, list=18%, signal=52%
ENDOCYTOSIS%KEGG%HSA04144	ENDOCYTOSIS%KEGG%HSA04144	185	0.438808	1.22741	0.0892532	0.314622	1	2860	tags=35%, list=17%, signal=42%
RENIN-ANGIOTENSIN SYSTEM%KEGG%HSA04614	RENIN-ANGIOTENSIN SYSTEM%KEGG%HSA04614	17	0.611881	1.22645	0.201629	0.31052	1	2655	tags=29%, list=15%, signal=35%
MEASLES%KEGG%HSA05162	MEASLES%KEGG%HSA05162	112	0.459552	1.21694	0.115596	0.321421	1	3265	tags=39%, list=19%, signal=48%
AMYOTROPHIC LATERAL SCLEROSIS (ALS)%KEGG%HSA05014	AMYOTROPHIC LATERAL SCLEROSIS (ALS)%KEGG%HSA05014	50	0.501435	1.21447	0.170588	0.320258	1	2345	tags=24%, list=14%, signal=28%
LINOLEIC ACID METABOLISM%KEGG%HSA00591	LINOLEIC ACID METABOLISM%KEGG%HSA00591	23	0.568784	1.2067	0.193548	0.32783	1	1114	tags=9%, list=6%, signal=9%
CIRCADIAN RHYTHM - MAMMAL%KEGG%HSA04710	CIRCADIAN RHYTHM - MAMMAL%KEGG%HSA04710	22	0.584762	1.20533	0.20284	0.324552	1	406	tags=14%, list=2%, signal=14%
RETINOL METABOLISM%KEGG%HSA00830	RETINOL METABOLISM%KEGG%HSA00830	47	0.49302	1.20209	0.179842	0.32444	1	2460	tags=9%, list=14%, signal=10%
PPAR SIGNALING PATHWAY%KEGG%HSA03320	PPAR SIGNALING PATHWAY%KEGG%HSA03320	70	0.480929	1.20204	0.140816	0.319238	1	1657	tags=11%, list=10%, signal=13%
GLUTAMATERGIC SYNAPSE%KEGG%HSA04724	GLUTAMATERGIC SYNAPSE%KEGG%HSA04724	113	0.438751	1.18871	0.158379	0.336201	1	2297	tags=16%, list=13%, signal=18%
NICOTINATE AND NICOTINAMIDE METABOLISM%KEGG%HSA00760	NICOTINATE AND NICOTINAMIDE METABOLISM%KEGG%HSA00760	16	0.600692	1.17933	0.219665	0.347366	1	1427	tags=19%, list=8%, signal=20%
INSULIN SIGNALING PATHWAY%KEGG%HSA04910	INSULIN SIGNALING PATHWAY%KEGG%HSA04910	135	0.426188	1.17161	0.149281	0.35612	1	3425	tags=34%, list=20%, signal=42%
CHAGAS DISEASE (AMERICAN TRYPANOSOMIASIS)%KEGG%HSA05142	CHAGAS DISEASE (AMERICAN TRYPANOSOMIASIS)%KEGG%HSA05142	92	0.451686	1.1627	0.159851	0.366998	1	2543	tags=38%, list=15%, signal=44%
CHEMOKINE SIGNALING PATHWAY%KEGG%HSA04062	CHEMOKINE SIGNALING PATHWAY%KEGG%HSA04062	169	0.404466	1.13833	0.17037	0.407217	1	3398	tags=34%, list=20%, signal=42%
FC GAMMA R-MEDIATED PHAGOCYTOSIS%KEGG%HSA04666	FC GAMMA R-MEDIATED PHAGOCYTOSIS%KEGG%HSA04666	88	0.432306	1.13367	0.20696	0.410525	1	3005	tags=39%, list=17%, signal=47%
GLYCOSAMINOGLYCAN DEGRADATION%KEGG%HSA00531	GLYCOSAMINOGLYCAN DEGRADATION%KEGG%HSA00531	17	0.573225	1.13277	0.292473	0.406006	1	2400	tags=29%, list=14%, signal=34%
NEUROTROPHIN SIGNALING PATHWAY%KEGG%HSA04722	NEUROTROPHIN SIGNALING PATHWAY%KEGG%HSA04722	125	0.41145	1.13071	0.191651	0.404884	1	1966	tags=22%, list=11%, signal=25%
GLYCEROPHOSPHOLIPID METABOLISM%KEGG%HSA00564	GLYCEROPHOSPHOLIPID METABOLISM%KEGG%HSA00564	79	0.431804	1.11885	0.220036	0.421402	1	3688	tags=30%, list=21%, signal=38%
AMINO SUGAR AND NUCLEOTIDE SUGAR METABOLISM%KEGG%HSA00520	AMINO SUGAR AND NUCLEOTIDE SUGAR METABOLISM%KEGG%HSA00520	42	0.472941	1.10686	0.296443	0.440928	1	1792	tags=14%, list=10%, signal=16%
ARGININE AND PROLINE METABOLISM%KEGG%HSA00330	ARGININE AND PROLINE METABOLISM%KEGG%HSA00330	50	0.459318	1.1038	0.305927	0.441005	1	3057	tags=30%, list=18%, signal=36%
SYSTEMIC LUPUS ERYTHEMATOSUS%KEGG%HSA05322	SYSTEMIC LUPUS ERYTHEMATOSUS%KEGG%HSA05322	100	0.415122	1.10104	0.239766	0.440679	1	1421	tags=16%, list=8%, signal=17%
VIBRIO CHOLERAE INFECTION%KEGG%HSA05110	VIBRIO CHOLERAE INFECTION%KEGG%HSA05110	51	0.451066	1.0907	0.28972	0.456581	1	1458	tags=18%, list=8%, signal=19%
ALDOSTERONE-REGULATED SODIUM REABSORPTION%KEGG%HSA04960	ALDOSTERONE-REGULATED SODIUM REABSORPTION%KEGG%HSA04960	42	0.464544	1.08904	0.30303	0.454115	1	998	tags=14%, list=6%, signal=15%
PANCREATIC SECRETION%KEGG%HSA04972	PANCREATIC SECRETION%KEGG%HSA04972	92	0.409865	1.08308	0.295367	0.460846	1	1725	tags=13%, list=10%, signal=14%
CYTOSOLIC DNA-SENSING PATHWAY%KEGG%HSA04623	CYTOSOLIC DNA-SENSING PATHWAY%KEGG%HSA04623	47	0.45561	1.07894	0.305927	0.463237	1	1845	tags=26%, list=11%, signal=29%
ECM-RECEPTOR INTERACTION%KEGG%HSA04512	ECM-RECEPTOR INTERACTION%KEGG%HSA04512	83	0.411884	1.07871	0.295688	0.457748	1	2965	tags=24%, list=17%, signal=29%
COLLECTING DUCT ACID SECRETION%KEGG%HSA04966	COLLECTING DUCT ACID SECRETION%KEGG%HSA04966	27	0.496433	1.06484	0.361522	0.480794	1	1458	tags=19%, list=8%, signal=20%
TGF-BETA SIGNALING PATHWAY%KEGG%HSA04350	TGF-BETA SIGNALING PATHWAY%KEGG%HSA04350	82	0.414179	1.06435	0.317491	0.475783	1	2374	tags=22%, list=14%, signal=25%
ETHER LIPID METABOLISM%KEGG%HSA00565	ETHER LIPID METABOLISM%KEGG%HSA00565	35	0.467187	1.05411	0.372951	0.491488	1	1706	tags=20%, list=10%, signal=22%
ABC TRANSPORTERS%KEGG%HSA02010	ABC TRANSPORTERS%KEGG%HSA02010	43	0.447499	1.04972	0.348089	0.495101	1	1933	tags=26%, list=11%, signal=29%
HEPATITIS C%KEGG%HSA05160	HEPATITIS C%KEGG%HSA05160	116	0.384148	1.04093	0.352399	0.507646	1	3045	tags=26%, list=18%, signal=31%
PROTEIN PROCESSING IN ENDOPLASMIC RETICULUM%KEGG%HSA04141	PROTEIN PROCESSING IN ENDOPLASMIC RETICULUM%KEGG%HSA04141	146	0.372589	1.03338	0.369115	0.517964	1	2005	tags=20%, list=12%, signal=22%
VEGF SIGNALING PATHWAY%KEGG%HSA04370	VEGF SIGNALING PATHWAY%KEGG%HSA04370	74	0.402849	1.02645	0.393411	0.526616	1	3236	tags=32%, list=19%, signal=40%
T CELL RECEPTOR SIGNALING PATHWAY%KEGG%HSA04660	T CELL RECEPTOR SIGNALING PATHWAY%KEGG%HSA04660	106	0.379871	1.02428	0.362007	0.525309	1	2970	tags=29%, list=17%, signal=35%
PATHWAYS IN CANCER%KEGG%HSA05200	PATHWAYS IN CANCER%KEGG%HSA05200	317	0.341098	1.00933	0.369863	0.551812	1	2874	tags=22%, list=17%, signal=26%
PROXIMAL TUBULE BICARBONATE RECLAMATION%KEGG%HSA04964	PROXIMAL TUBULE BICARBONATE RECLAMATION%KEGG%HSA04964	21	0.49137	1.00854	0.410208	0.547271	1	998	tags=14%, list=6%, signal=15%
DRUG METABOLISM - OTHER ENZYMES%KEGG%HSA00983	DRUG METABOLISM - OTHER ENZYMES%KEGG%HSA00983	39	0.438779	1.0052	0.462926	0.548289	1	3623	tags=21%, list=21%, signal=26%
LEUKOCYTE TRANSENDOTHELIAL MIGRATION%KEGG%HSA04670	LEUKOCYTE TRANSENDOTHELIAL MIGRATION%KEGG%HSA04670	104	0.380913	1.00382	0.396584	0.545241	1	1958	tags=25%, list=11%, signal=28%
SALIVARY SECRETION%KEGG%HSA04970	SALIVARY SECRETION%KEGG%HSA04970	72	0.394933	0.999367	0.438247	0.548826	1	1725	tags=15%, list=10%, signal=17%
REGULATION OF AUTOPHAGY%KEGG%HSA04140	REGULATION OF AUTOPHAGY%KEGG%HSA04140	20	0.488455	0.985703	0.484277	0.572843	1	3634	tags=45%, list=21%, signal=57%
CALCIUM SIGNALING PATHWAY%KEGG%HSA04020	CALCIUM SIGNALING PATHWAY%KEGG%HSA04020	155	0.350836	0.979751	0.471591	0.580332	1	2338	tags=18%, list=14%, signal=21%
AMOEBIASIS%KEGG%HSA05146	AMOEBIASIS%KEGG%HSA05146	93	0.36878	0.978059	0.459813	0.577915	1	2518	tags=30%, list=15%, signal=35%
DRUG METABOLISM - CYTOCHROME P450%KEGG%HSA00982	DRUG METABOLISM - CYTOCHROME P450%KEGG%HSA00982	54	0.397648	0.976538	0.478682	0.575333	1	2388	tags=9%, list=14%, signal=11%
P53 SIGNALING PATHWAY%KEGG%HSA04115	P53 SIGNALING PATHWAY%KEGG%HSA04115	62	0.380488	0.96238	0.500911	0.59997	1	1203	tags=15%, list=7%, signal=16%
GLUTATHIONE METABOLISM%KEGG%HSA00480	GLUTATHIONE METABOLISM%KEGG%HSA00480	45	0.388374	0.941191	0.532819	0.641002	1	2682	tags=24%, list=16%, signal=29%
APOPTOSIS%KEGG%HSA04210	APOPTOSIS%KEGG%HSA04210	75	0.369547	0.934962	0.567273	0.648018	1	2971	tags=28%, list=17%, signal=34%
BILE SECRETION%KEGG%HSA04976	BILE SECRETION%KEGG%HSA04976	65	0.369456	0.919516	0.589595	0.677619	1	2112	tags=15%, list=12%, signal=17%
COMPLEMENT AND COAGULATION CASCADES%KEGG%HSA04610	COMPLEMENT AND COAGULATION CASCADES%KEGG%HSA04610	62	0.364785	0.913265	0.598802	0.685127	1	2528	tags=19%, list=15%, signal=23%
FOCAL ADHESION%KEGG%HSA04510	FOCAL ADHESION%KEGG%HSA04510	193	0.319476	0.903459	0.675579	0.700604	1	2981	tags=26%, list=17%, signal=31%
PORPHYRIN AND CHLOROPHYLL METABOLISM%KEGG%HSA00860	PORPHYRIN AND CHLOROPHYLL METABOLISM%KEGG%HSA00860	37	0.393937	0.89057	0.614068	0.7226	1	2018	tags=14%, list=12%, signal=15%
SMALL CELL LUNG CANCER%KEGG%HSA05222	SMALL CELL LUNG CANCER%KEGG%HSA05222	82	0.339851	0.889661	0.641544	0.717864	1	3139	tags=27%, list=18%, signal=33%
PRION DISEASES%KEGG%HSA05020	PRION DISEASES%KEGG%HSA05020	33	0.386654	0.88076	0.642045	0.731663	1	1854	tags=21%, list=11%, signal=24%
TASTE TRANSDUCTION%KEGG%HSA04742	TASTE TRANSDUCTION%KEGG%HSA04742	38	0.376562	0.876112	0.634429	0.735432	1	911	tags=5%, list=5%, signal=6%
ACUTE MYELOID LEUKEMIA%KEGG%HSA05221	ACUTE MYELOID LEUKEMIA%KEGG%HSA05221	56	0.356059	0.873829	0.673267	0.734288	1	2987	tags=32%, list=17%, signal=39%
RENAL CELL CARCINOMA%KEGG%HSA05211	RENAL CELL CARCINOMA%KEGG%HSA05211	69	0.349831	0.872886	0.693387	0.72962	1	2970	tags=29%, list=17%, signal=35%
GLYCOSAMINOGLYCAN BIOSYNTHESIS - HEPARAN SULFATE%KEGG%HSA00534	GLYCOSAMINOGLYCAN BIOSYNTHESIS - HEPARAN SULFATE%KEGG%HSA00534	25	0.393342	0.831075	0.724696	0.815159	1	2538	tags=16%, list=15%, signal=19%
NOTCH SIGNALING PATHWAY%KEGG%HSA04330	NOTCH SIGNALING PATHWAY%KEGG%HSA04330	47	0.326103	0.780161	0.831395	0.908696	1	3240	tags=40%, list=19%, signal=50%
PATHOGENIC ESCHERICHIA COLI INFECTION%KEGG%HSA05130	PATHOGENIC ESCHERICHIA COLI INFECTION%KEGG%HSA05130	51	0.322804	0.774309	0.879612	0.910735	1	1557	tags=20%, list=9%, signal=21%
AXON GUIDANCE%KEGG%HSA04360	AXON GUIDANCE%KEGG%HSA04360	116	0.277622	0.758114	0.973734	0.927887	1	2207	tags=13%, list=13%, signal=15%
DORSO-VENTRAL AXIS FORMATION%KEGG%HSA04320	DORSO-VENTRAL AXIS FORMATION%KEGG%HSA04320	22	0.359748	0.734419	0.860996	0.950519	1	3398	tags=36%, list=20%, signal=45%
RIBOSOME BIOGENESIS IN EUKARYOTES%KEGG%HSA03008	RIBOSOME BIOGENESIS IN EUKARYOTES%KEGG%HSA03008	70	0.278921	0.686582	0.976048	0.983808	1	1288	tags=11%, list=7%, signal=12%
BETA-ALANINE METABOLISM%KEGG%HSA00410	BETA-ALANINE METABOLISM%KEGG%HSA00410	27	0.285697	0.617935	0.98646	1	1	2977	tags=22%, list=17%, signal=27%
PANTOTHENATE AND COA BIOSYNTHESIS%KEGG%HSA00770	PANTOTHENATE AND COA BIOSYNTHESIS%KEGG%HSA00770	16	0.302905	0.610247	0.969819	0.993654	1	2126	tags=19%, list=12%, signal=21%
